# Supplementary material for: MaRAP2‐4, a waterlogging‐responsive ERF from Mentha, regulates bidirectional sugar transporter AtSWEET10 to modulate stress response in Arabidopsis
Source: PubMed Central journal article supplement (PMC5785340; doi:10.1111/pbi.12762), 2017-07-25
Supplement: PBI-16-221-s001.pdf [file PBI-16-221-s001.pdf]

## Supplementary figure 1

ctaactcgactcgatctgatgctcagacactgagagttattgtgcttggaatcacttacg  
ctttaacgttacttatgtagaacagtcgattagctttttctcatcttaagttattatata  
catcatcttacgtactcgatttcgaagtagaatggcagcagctacaaagattatgtagca  
gcacttttagtagtagtttaatgtgatctttatatatacagatcatttagagagagttgat  
gcaagcacttgaacttttattcataacagtgcttctacaacttctccttgttcattttct  
ttatcttcatcttcatctcctccatcatcgatctttctcatcttcttcttctcctttt  
tctttatcttcaacttcttcatcttcacagcctgattttgggtaccagatttttggtca  
acatcttctacaggtacccaa  
atgttttctcaagggtattttagtaattatgagcaattatcatcagctggttcttgattct  
Met F S Q G Y F S N Y E Q L S S A V L D S  
tcatctccttcttcttcaatcttaatcatcttaccttagctcagattcaacaacttcaa  
S S P S S F N L N H L T L A Q I Q Q L Q  
caacagattcttcttcaacaacaacagaattcatacgtgaacatgatttcacaacatcaa  
Q Q I L L Q Q Q N S Y V N M I S Q H Q  
acaaccagaattcatacctaagtccaaaatcaattccaatgaaagcagtggtttatca  
T T Q N S Y L S P K S I P M K A V G L S  
tcacagacagccaaaccacaaagctatacaggggagttagacagagacattggggaaaa  
S Q T A K P T K L Y R G V R Q R H W G K  
tgggttgagagatcagactaccaagaaacaggacaaggctttgggttaggtacttttgac  
W V A E I R L P R N R T R L W L G T F D  
actgctgaggaagctgccatggcttatgacagagctgcttacaagctaagaggtgatttt  
T A E E A A M A Y D R A A Y K L R G D F  
gccagactcaatgtcccacatctgaagcaccaattatcaagtgctggtgatgggaaattt  
A R L N V P H L K H Q L S S A G D G K F  
ggagatgaacaaaataaacctcttcttcatctggtgatgcaaagcttgaagctatttgt  
G D E Q N K P L P S S V D A K L E A I C  
cagagtttggctattaataactctgcctctcagaaacaaggaagatttccaaaccagtt  
Q S L A I N N S A S Q K Q G K I S K P V  
agagtttctagtaagaagactaagaaaatcatggctactgaagctgctgctggttggat  
R V S S K K T K K I M V T E A A A V V D  
tcaactccatcagtggttagttccagagaaggattcgtcatcatcaaaatgtgaaatgggt  
S T P S V V V P E K D S S S S K C E M G  
tttctgggttcatcacattcagaggtttacaaagtggagaattcgttgctcaccaccatta  
F L G S S H S E V Y K V E N S L S P P L  
agcagtagtgatgatgtatcagttttatcatattcttcacctgaatcttgcattgagatc  
S S S D D V S V L S Y S S P E S C I E I  
ccagatttcacagaacaagcatggaacaatgattggttcttcatcagagaattttatggtg  
P D F T E Q A W N N D C S S S E N F M L  
cagaaatatccttcttatgaggttgattgggctgctatcctttcttag  
Q K Y P S Y E V D W A A I L S Stop  
ggtctagaatggcagctacaaaatattagggtgctatcctttcttagggatccccgagg  
gctgctatcctttcttaggatccccca

Supplementary figure 1: Full length assembled alignment of MaRAP2-4 nucleotide and amino acid sequence with 5' and 3' UTRs. Blue colour indicates 58 amino acid long DBD.

## Supplementary figure 2

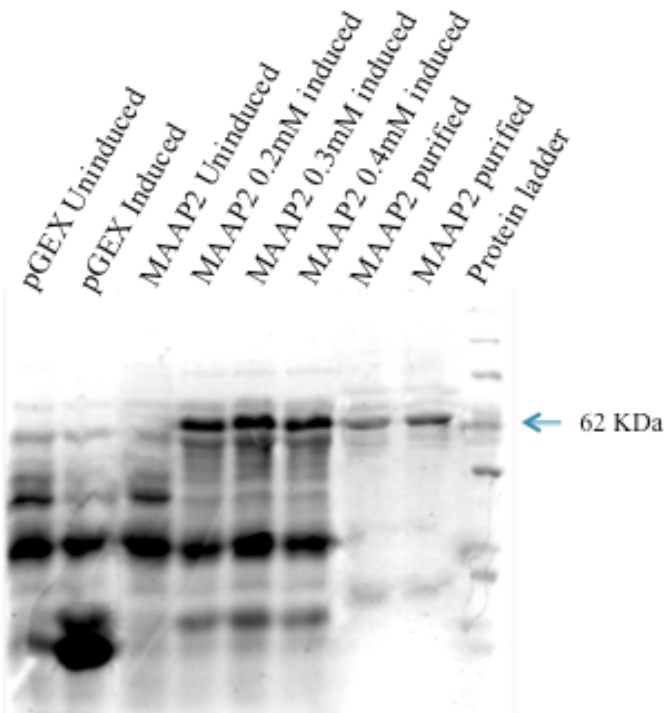

Supplementary figure 2: Induction of MaRAP2-4-GST with different concentration of IPTG and its purification with Sepharose GST beads (Amersham).

## Supplementary figure 3

DRE1: AGA**GCCGAC**AGAT**GCCGACTGGCCGACCT**  
DRE1(M): AGA**GCCTAC**AGAT**GCCTACTGGCCTACCT**  
DRE2: AGA**TACCGACAT**AGAT**TACCGACATTGTACCGACATCT**  
DRE2(M): AGA**TACTGACAT**AGAT**TACTGACATTGTACTGACATCT**  
GCC: AGA**AGCCGCC**AGAT**AGCCGCCTGAGCCGCCCT**  
GCC(M): AGA**AGCCACC**AGAT**AGCCACCTGAGCCACCCT**  
JARE: AGA**CATGAATT**AGAT**CATGAATTGCATGAATTCT**  
JARE(M): AGA**CATGCATT**AGAT**CATGCATTGCATGCATTCT**

Supplementary figure 3: Sequences of probes used for EMSA. Red colour indicates *cis*-element and blue colour indicates substitution in *cis*-element.

## Supplementary figure 4

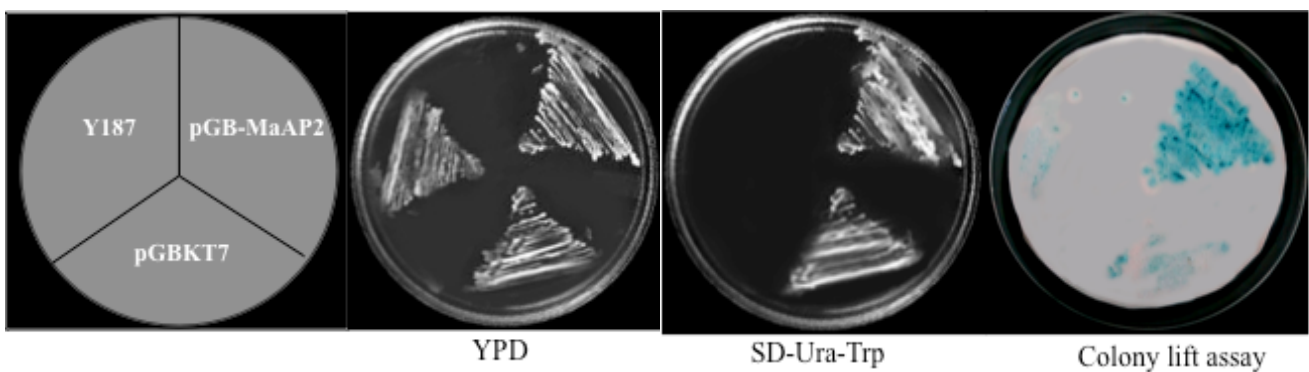

Supplementary figure 4: Transactivation/ $\beta$ -Galactosidase colony lift assay in which MaRAP2-4-GAL4-DBD activates target gene LacZ to produce blue colour.

## Supplementary figure 5

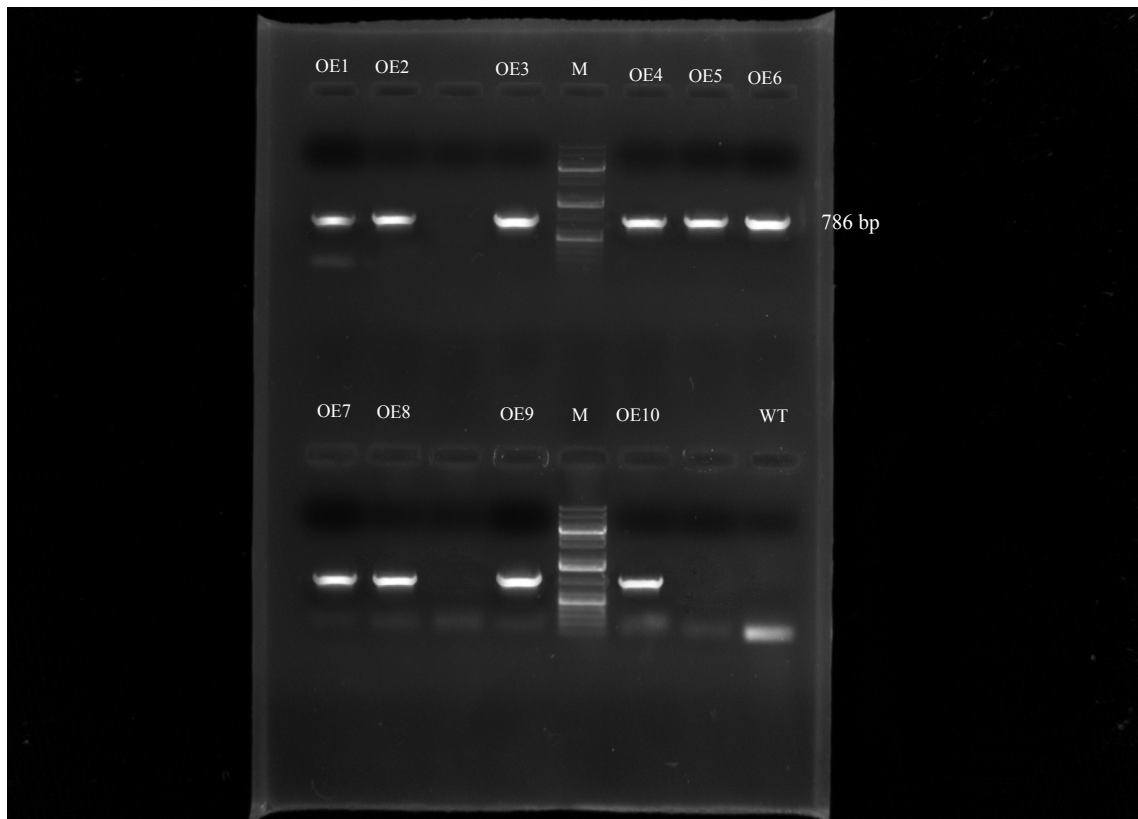

Supplementary figure 5: Genomic DNA PCR with NPT2 (Kan<sup>R</sup>) primers for confirmation of MaRAP2-4 transformation in *Arabidopsis*

## Supplementary figure 6

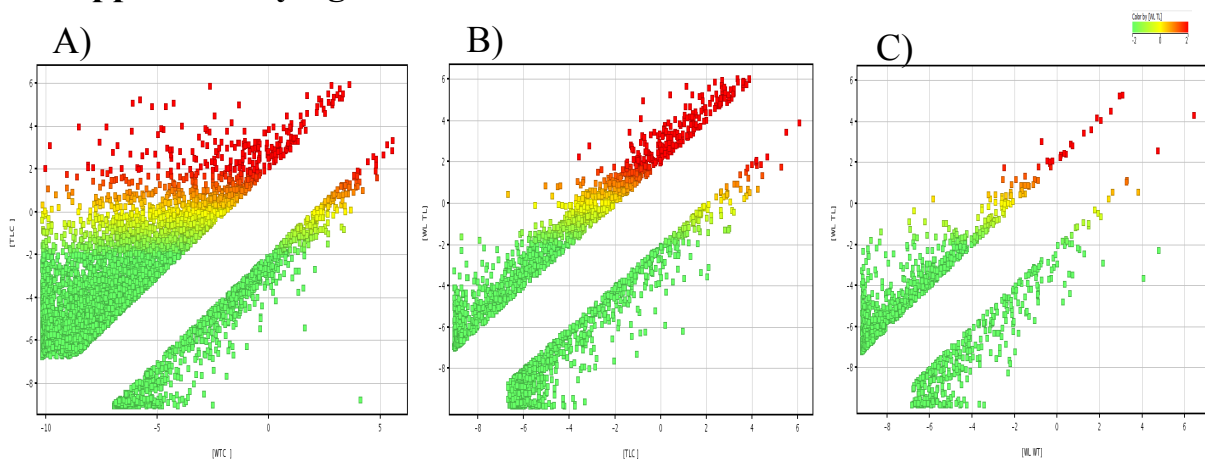

Supplementary figure 6: The Scatter Plot shows a 2-D scatter of differentially regulated probes for fold change  $>2$  and  $<-2$  above of the active entity. The axes of the scatter plot is based on intensity in terms of log to the base 10 in each group. Red colour represents up-regulation and green represents down-regulation. A) RAP2-4OE vs WT under control condition. B) OE-6D-WL vs RAP2-4OE. C) OE-6D-WL vs WT-6D-WL.

## Supplementary figure 7

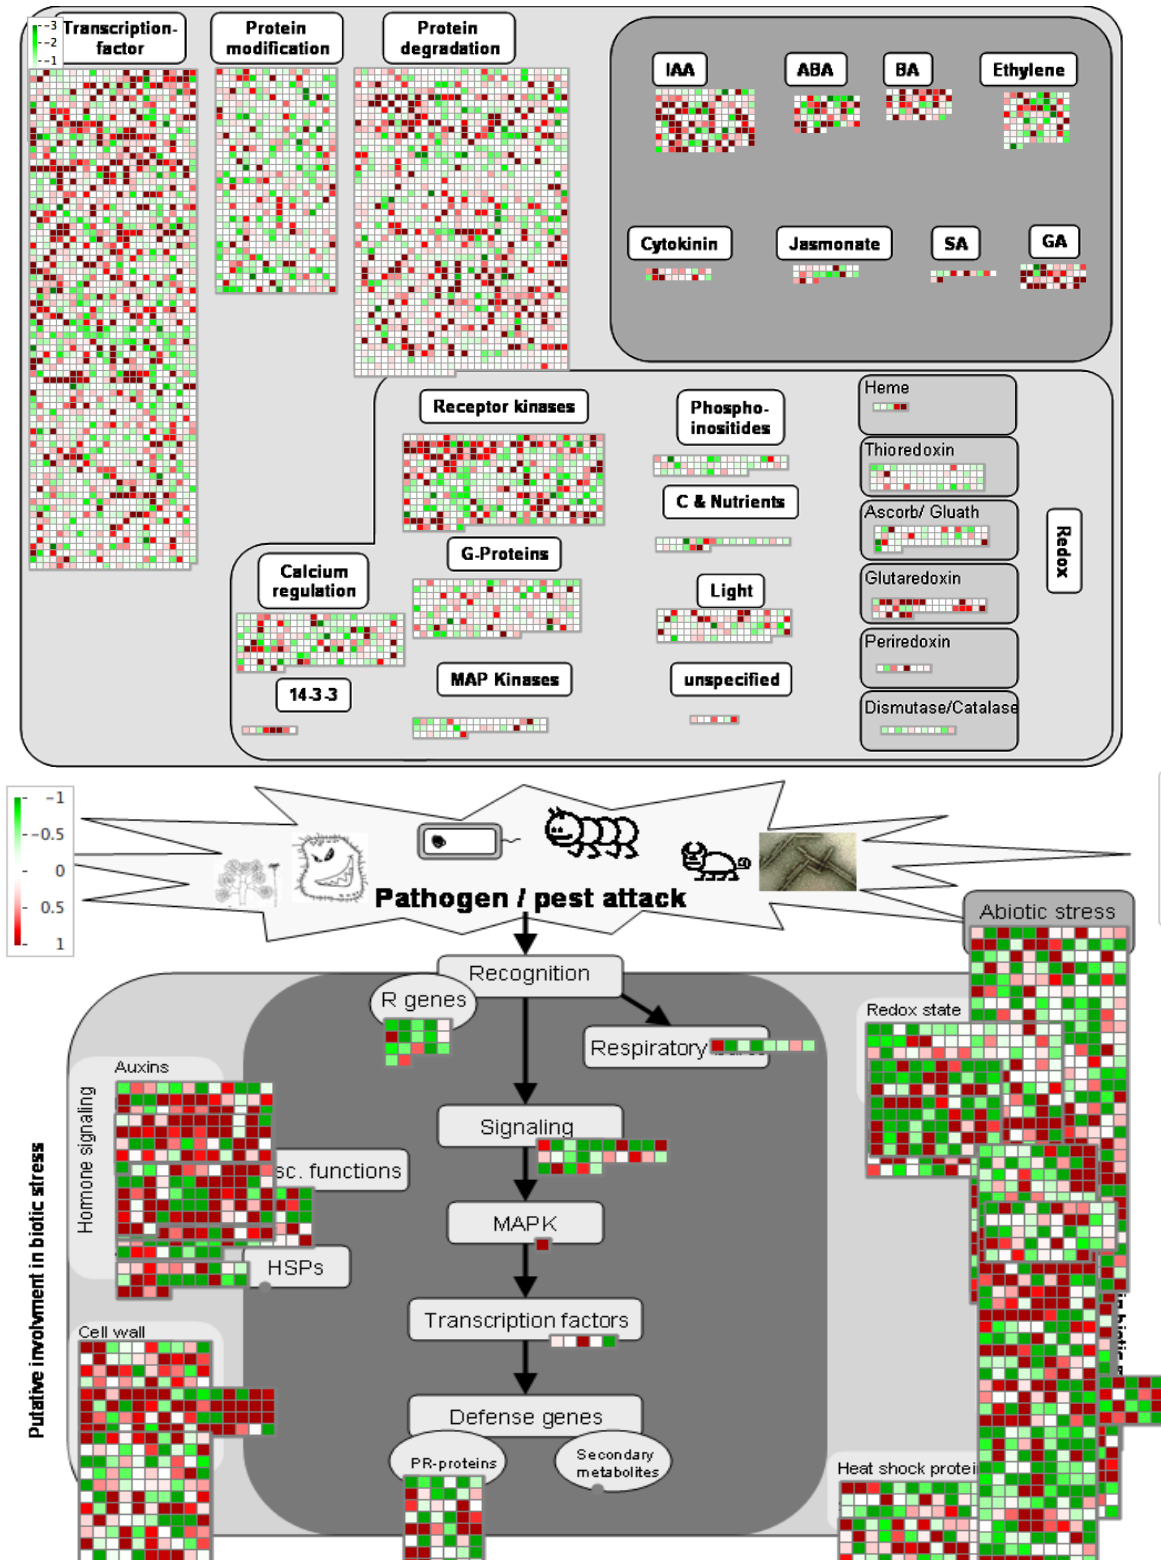

Supplementary figure 7: Normalized log<sub>2</sub> expression values for up- and down-regulated genes of MaRAP2-4 vs WT under control condition are plotted onto boxes corresponding to their putative functional annotation using Mapman 3.6. Color intensity reflects the extent of increase in expression level, with more intense color (red- up-regulation, green- down-regulation) means more up- or down-regulation.

## Supplementary figure 8

### *Arabidopsis thaliana* Sweet 10 promoter- 9.34 fold

```
ATTGATGAAACCAAAGCAAAAAATTAACGAACGAAATGAAATCATCTTGCAAATGAAGAAGAAGGGGA
ATAGTAAAAACAGAGTTTCAGATTTGTGGCAGATCTGCAATCGAGTATTCGAAATCAAAGCTTTTCAATAAT
CATTGCGTCCTCACTATTCACCATTAATGATATTTGTTTATTGGAAGAGAATCCATTCAAAAACATAACC
CTAATGATTATTGTAAGGGGAACCCAAGCAAAAAAATCAAACGCACATTGATAAGTTTCTGAGATAGAAT
CTGATGATAAAGAGGAAGATCAGAGAAAAGAAAAAGAACTGAGCCATCTCTCTCATGATTACAGG
CCGCCGACGCCGTTTCGTACCATTGAAGGAGCTCATCTTAAGGGACACAACCAATCAACTATC
GTCACCGGAGCTAGCCCCGCTCAATCACGTTGTAATAAATCAATTGATCTGCAGAGAGAGAAAGAGATT
GATGGAACGGAGACAGATCCAGTTGTTAATGGCGATGATGATGGCGTCGGTACGTTACGTTG
GTGATGATGATGAGGGTTGATAACGACGACGACGACAACAAAAAATCATACAATTTTTATTG
TTTTCTCAAATGATGAATCAAGGGTAATAGCGTCATTTCAAATAAGTAAAAGTACCTGATTCGTAAGCCAT
CTAAAAGTACCGGATTCTATAAATTTTTATGTTTTTGTGGTTTTTAGACAAATAAGTCTCTGTAATTTCTTT
GATTATGCACTGGTTGAACATATATATTTGGCAACTTAAATATAAAGAAATCATATAAGGGTTTTGAAAAATTT
TAGAGCATTATGGAGTGGTATTTCAAAATATCAGCTCTGCGAGAAAAACAAGACAATAGCGTTACGAGTG
GATTTTTGTTCTGAAAGTATCTAATAGAACAGTGGATGCAAACTTATATGAAATATAGAATTTACTATAA
GTACTATTTAACGAGAAAGATATATAAATAAAATTTCCGCTTATAAGTTTTGTAAAAGTTGACATGGTTCAAT
AGATATGCAGACTAATCCAAAAGTCACCCAATACCTATAGCAAACATAAAAAATAAATATTTATAAAAAGAA
GAACCAAAAACCTATAAAAAGTTAAGAACTATAGAAATTCGTGATGAGATACATGTGAATTACCAACGAGA
GACTCGATTACATGAGTTTCTTAACTAGTTTAACAAAAACATGGTTTCATCTTATACTACAAAAAATAAGCC
AATCTAGACATGATTAACAAATAGTGTATATTACAAAAAGTTCCCTCAAAAAAACACATTTTGAGG
AAGCTAATCATGTCTAAACAAAGTAAATTCATTACATCACAAAAATTGTGGAAAAGAGCAAGATGTAGTATAT
CTGTAATCAAATATGTTCAAACGAGCATCAAAATTCACCTAAACAACCTTCTGAACACTATGATAATATCTTC
AATCTGTTTAGTATATCTTTACAATCGTGATTATCTTCTTTGGTTCCCGGCTCGCTCCATTGAATAGGACT
AATTTATATTGTTCAATTGCGGATTACCTACTGGAAGTGTAAGAGTTAATGCAGCCAACCTCATTTTTTCC
AGAGAGATTACATAAAGACCTAAATAAAAATTTGGGAAACATATATCTTTTCTTTCTTTTGTAAATATGTT
GGCGGAAAAGATTTCAAAAAGGGGATTTCCCTAAATGATAGCTTACATTTAGAAAACGAACATGAGCATGA
CAATTCGGTTTAGGTAAAAGACCAACTTGCTCTCATTGCACCTGTA AAAACCTAAGCAAGAGAGTTGAAAA
CAGTAAACGTCTAAGCACCTACTTGTTGGTGACACGTCGGAAAGGCCAAAATTTGGTCCACTAGAATGT
ACCAGAATGGTACTTGCAAGATTTTAAAGTTTGTAGTCTCATAAGTTGCTGAGCTGGATAGATACCCACCC
ACATTTTAGGTTTATAGGTTTTGATTATCCCCACAAATTTATGAGATAAGATTTAGGTTAATTTCCGAT
GCCGACATCAATGTGCGCACAACAATCATTTCATTGATGAACAAAAAATAAATG
GTGAAATTACCTTCTCATCAAAGATATTATTATAGAGTGAACATTATGTGAATTTCTTGAAATGGAGAGAA
TTCTATCCTCACGATATATCTAGATTATATATATATTTTTTAAATATATATCTAGAATATATATTTCTATCAAG
AGTCACTGATTTATATTGGTCAACCAAAATTTGATCTTACCAATTCATACACAATTACATTATTTGCTAAAAC
TTATACACGATTATGCTAATAAAAACAGTAATATGACTCGTATATGCTATATAGAGTGACCACTGACCAT
ACATTTCTTTGAGGAAACTAGTATTCGAGAAAACTTAGTCATGTTTCTGATATGCAGATCTAAAAGCTCATA
AAAATTAACGGTTTAAACCATTACATAAACACACAAAAAACTATGTATAAATTGAGTACATGATGCATATAAAA
TCGATAGATGGGTAAGATCATTATGCTTAGGTGAAAGAAAAAAGGGAAACCTTCCGAGGCAATGGGGCAT
GAAGTATACAACTGTAAAGTAAGAGATAATGCTCTTTGATTCTTTTTTCCCACTATAACATCCCATTGAGTTC
AAACTCTTCTCTCTCTCTCTCTCTCTCTCTCTCTCTCTCTCTCTCTCTCTCTCTCTCTCTCTCTCTCTCT
TCTTCTCTCTATATAAATCACTACTCTCAATCAAAAAATTGT
```

Supplementary figure 8: Promoter sequence of AtSWEET10 with MaRAP2-4 interacting *cis*-motifs

## Supplementary figure 9

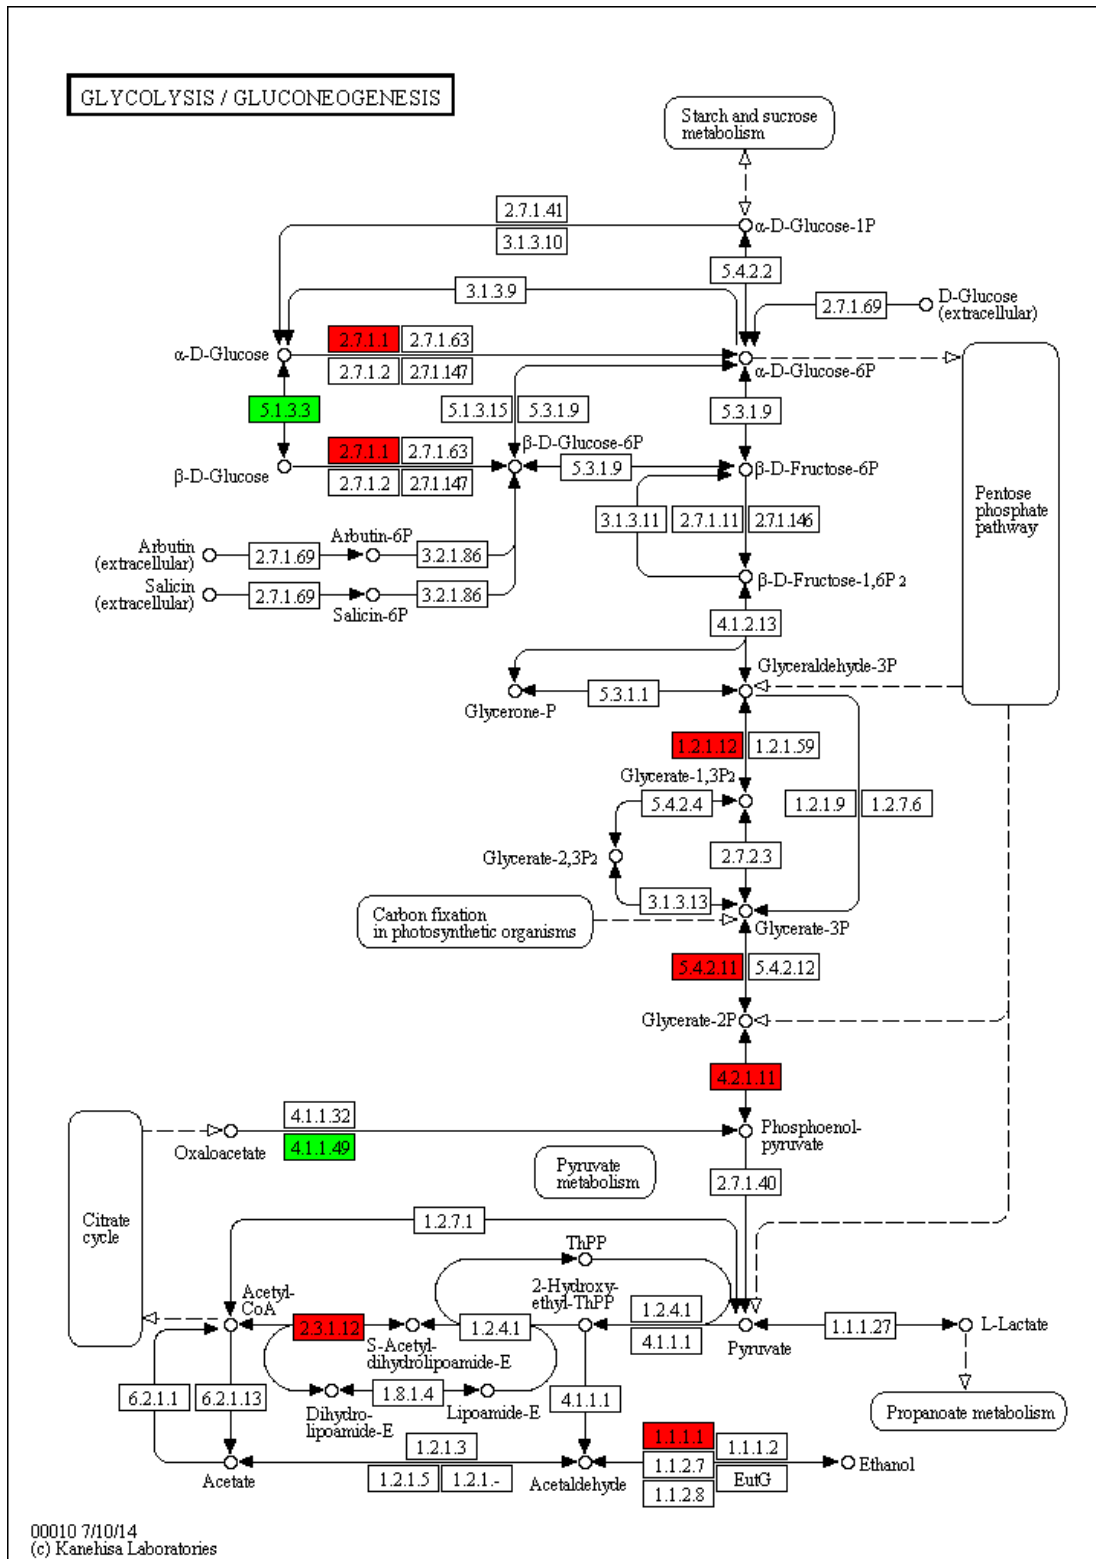

Supplementary figure 9: Up- and down-regulated genes in Glycolysis/ Gluconeogenesis. Red colour represents up-regulation and green colour represents down-regulation.





**Supplementary material 1: List of primers with their sequences used in this study.**

| Designation                            | IDs       | Sequence                                                    | T <sub>m</sub> °C | Category                                                |
|----------------------------------------|-----------|-------------------------------------------------------------|-------------------|---------------------------------------------------------|
| APRACE3'                               |           | TTGACTTGGTACCTGCCCCG                                        | 63.94             | RACE                                                    |
| APRACE5'                               |           | TTTCCAGTGGTTATTACCGG                                        | 56.03             |                                                         |
| RAP-RTF                                |           | TCACCTGAATCTTGCATTGAGATC                                    | 61.28             | qRT-PCR<br><i>Mentha</i>                                |
| RAP-RTR                                |           | TAGCAGCCCAATCAACCTCAT                                       | 60.42             |                                                         |
| MACTINF                                |           | GGATATTCAGCCCCTCGTCT                                        | 58.95             |                                                         |
| MACTINR                                |           | GTAGAAGGTATGATGCCAAA                                        | 51.31             |                                                         |
| RAP-pGEXF                              |           | GGGATCCTCTTCTACAGGTACCCAA                                   | 63.43             |                                                         |
| RAP-pGEXR                              |           | TCTCGAGCTAAGAAAGGATAGCAGCCCA                                | 69.26             |                                                         |
| RAP-pBIF                               |           | GTCTAGATCTTCTACAGGTACCCAA                                   | 55.87             | for pBI121<br>cloning and<br>transgenic<br>confirmation |
| RAP-pBIR                               |           | TGGATCCCTAAGAAAGGATAGCAGCCCA                                | 70.32             |                                                         |
| NPT2F                                  |           | GAACAAGATGGATTGCACGC                                        | 60.05             |                                                         |
| NPT2R                                  |           | GAAGAACTCGTCAAGAAGGC                                        | 55.17             |                                                         |
| RAP-pGBF                               |           | GCATATGTCTTCTACAGGTACCCAA                                   | 59.31             | for pGBKT7<br>cloning                                   |
| RAP-pGBR                               |           | TGGATCCCTAAGAAAGGATAGCAGCCCA                                | 70.32             |                                                         |
| RAP-pGB5D                              |           | GCCCCGATCCCTAAGCCCAATCAACCTCATA                             | 76.03             | for cloning of<br>different<br>truncations in<br>pGBKT7 |
| RAP-pGB10D                             |           | GCCCCGATCCCTACTGCAACATAAAAATTCTC                            | 71.72             |                                                         |
| RAP-pGB30D                             |           | GCCCCGATCCCTATTGTTCTGTGAAATCTGG                             | 74.07             |                                                         |
| RAP-pGB45D                             |           | TGGATCCCTAATATGATAAAACTGATGC                                | 62.18             |                                                         |
| RAP-pGB60D                             |           | TGGATCCCTACAACGAATTCTCCACTTTG                               | 69.02             |                                                         |
| RAP-pGB75D                             |           | TGGATCCCTAAAAACCATTTACATTTTG                                | 68.96             |                                                         |
| RAP-pGB90D                             |           | TGGATCCCTATACACTGATGGAGTTGAATC                              | 68.83             |                                                         |
| RAP-pGB105D                            |           | TGGATCCCTACATGATTTTCTTAGTCTTC                               | 62.69             |                                                         |
| RAP-pGB138D                            |           | TGGATCCACTATTCAAGCTTTGCATCAAC                               | 68.29             |                                                         |
| D1F                                    |           | AGACTCAATTTCCCACCTCTTCCTTCATCTGTT                           | 70.2              |                                                         |
| D1R                                    |           | AGATGAAGGAAGAGGTGGGAAATTGAGTCTGGC                           | 73.31             |                                                         |
| D2F                                    |           | GATGAACAAAATAAAAACCTGCCTCTCAGAAA                            | 66.67             |                                                         |
| D2R                                    |           | CTGAGAGGCAGAGTTTTTATTTTGTTCATCTCC                           | 67.87             |                                                         |
| D3F                                    |           | AGTTTGGCTATTAATACTAAGAAAATCATGGTC                           | 62.07             |                                                         |
| D3R                                    |           | CATGATTTTCTTAGTATTAATAGCCAAACTCTG                           | 61.7              |                                                         |
| RAP-pGADF                              |           | GGGATCCTCTTCTACAGGTACCCAA                                   | 63.43             | for pGAD<br>cloning                                     |
| RAP-pGADR                              |           | TCATATGCTAAGAAAGGATAGCAGCCCA                                | 66.33             |                                                         |
| PHISW3F                                |           | TGAATTCATAAAGCCAATCTAGACATG                                 | 60.48             | For cloning<br>promoter<br>fragments in<br>pHIS2.0      |
| PHISW3R                                |           | TGAGCTCAATTCACATAATGTTCACTC                                 | 61.46             |                                                         |
| PHISW1F                                |           | TACGCGTATTGATGAAACCAAAGCAA                                  | 66.71             |                                                         |
| PHISW1R                                |           | TACTAGTCGACGCCATCATCATCGCCA                                 | 71.51             |                                                         |
| TPPB trehalose-6-phosphate phosphatase | AT1G78090 | CCAAGGTAGAAAGGTAAGTACTTGAATCC<br>TGAGTGCCCTGGCCCTTGT        | 60.38<br>61.24    | Sugar<br>metabolism/trans<br>port responsive<br>genes   |
| cwINV4 beta-fructofuranosidase         | AT2G36190 | TTCTCATGTGCTCCGATGCTA<br>TGCGAGTAAACCGTGTCTTG               | 60.34<br>61.92    |                                                         |
| STP5 sugar transport protein 5         | AT1G34580 | TGACGATATTCGTCATCATGTTCTT<br>TGCTTCTCCCAAACCTTGATACATAGA    | 60.54<br>61.07    |                                                         |
| STP14 sugar transport protein 14       | AT1G77210 | TGTGGTGTGCGTGAACCTTT<br>CACAGCGACACCAGGAAACA                | 60.99<br>61.71    |                                                         |
| SUS1 sucrose synthase 1                | AT5G20830 | TCGAACCTTGACCGTCTTGAG<br>ATGGGCGATACTTCAATGCAT              | 61.15<br>60.14    |                                                         |
| adh like                               | AT1G09510 | CAGTTTTGAATGCATTGGTTTAGC<br>CCCCGGCGAGTACTCTTGA             | 60.65<br>62.06    |                                                         |
| Sucrose synthase 3                     | AT4G02280 | AATCCGCGACTTGGTGA<br>GCTGAACCGGGTCAGTCATC                   | 61.32<br>61.44    |                                                         |
| Pyruvate, phosphate dikinase 1         | AT4G15530 | GTCGGCAAGTTTCTACCGATTT<br>TCAAAAGGGTCTGTCTGTAAGA            | 60.3<br>60.6      |                                                         |
| Sugar transporter ERD6-like 12/ERD6    | AT3G05400 | TTTCCAGTCGTTTGGCATTCT<br>CGCCGATGCAAGTGAAGA                 | 60.44<br>60.49    |                                                         |
| Glutamate decarboxylase 3/GAD3         | AT2G02000 | GTGGCCGAAATGCTTCGT<br>ATCCGCAGGCATCGTGTAG                   | 60.59<br>60.62    |                                                         |
| Sweet10                                | AT5G50790 | AGCTTTTAACTATCAAATGTCGATGTG<br>GACCCAAATAAAAACATTAACCCCTATC | 59.81<br>60.21    |                                                         |



|                                            |           |                                |       |                                    |
|--------------------------------------------|-----------|--------------------------------|-------|------------------------------------|
| Sweet1                                     | AT1G21460 | TGGGTTTGGATGTGCATTAGG          | 61.43 |                                    |
|                                            |           | TGCAGATTTCTCTCCTTTGTTCC        | 61.66 |                                    |
| Pyruvate decarboxylase<br>1/ PDC1          | AT4G33070 | GGAGAAGAAAGATTGTCTATGTTTCATAGA | 60.47 |                                    |
|                                            |           | GCGTGAGCCCCACTCAAG             | 61.39 |                                    |
| Peroxidase9/PERX9                          | AT5G42180 | AGCCTCTCCTGCAAGATTCG           | 60.45 |                                    |
|                                            |           | CAATAAGCCTTTGCCCCATAGA         | 61.05 |                                    |
| Catalase 3/CAT3                            | AT1G20620 | TGGTCGCTTGGTTCTGAACA           | 61.21 | antioxidant<br>responsive<br>genes |
|                                            |           | GCAAGCTGCTCAGTTTCATTGA         | 61.39 |                                    |
| L-ascorbate peroxidase<br>2/APX2           | AT3G09640 | GCCACAAGGAGCGTTCA              | 60.98 |                                    |
|                                            |           | CAAAAATGAGCGGGTTTGGT           | 60.66 |                                    |
| Iron/manganese SOD<br>family protein/FSD1  | AT3G56350 | GGGAAGCTGTAAGTGCCAGACT         | 60.62 |                                    |
|                                            |           | CAAATTGTTTCAGAAATTTGCTTAAGC    | 60.29 |                                    |
| ERF transcription factor<br>ERF071/HRE2    | AT2G47520 | CAAATGGGCAGCGGAGAT             | 60.55 | TFs                                |
|                                            |           | TGTGCCAAGCCAGACACGTA           | 62.25 |                                    |
| ERF transcription factor<br>ERF113/RAP2.6L | AT5G13330 | TTTCAACGCCTTCTTCATCTTCT        | 60.18 |                                    |
|                                            |           | TGTAACCATAATTCTTCTTCTTCTTCA    | 59.89 |                                    |
| NAC domain containing<br>protein 47/SHYG   | AT3G04070 | TTGGATCAGAAGTTACCGCAGTT        | 60.81 |                                    |
|                                            |           | CTTCCGATGCCGCTTGTC             | 61.3  |                                    |
| <i>Arabidopsis</i> Actin 1                 | AT2G37620 | CTTGGCCTCCCTCAGTACCTT          | 60.44 | actin                              |
|                                            |           | TGAACAATCGATGGACCTGACT         | 60.33 |                                    |

**Supplementary material 2: List of differentially expressed ESTs after SSH analysis of *M. arvensis* and *M. piperita* (red colour indicates the gene of study)**

| SI No. | Gene bank accession | Annotation                                                         |
|--------|---------------------|--------------------------------------------------------------------|
| 1      | JZ468944            | 17.9 kDa class II heat shock protein                               |
| 2      | JZ468946            | syntaxin-43-like                                                   |
| 3      | JZ468947            | Integrase-type DNA-binding superfamily protein                     |
| 4      | JZ468948            | dehydration responsive element binding protein                     |
| 5      | <b>JZ468949</b>     | <b>ethylene-responsive transcription factor RAP2-4-like</b>        |
| 6      | JZ468950            | AP2 4, putative                                                    |
| 7      | JZ468951            | AP2/ERF domain-containing transcription factor                     |
| 8      | JZ468952            | hypothetical protein VITISV_026680                                 |
| 9      | JZ468953            | uncharacterized protein LOC100839475                               |
| 10     | JZ468954            | No significant similarity                                          |
| 11     | JZ468955            | ribulose biphosphate carboxylase small chain 1, chloroplastic-like |
| 12     | JZ468957            | Cysteine-rich RLK (RECEPTOR-like protein kinase) 29                |
| 13     | JZ468958            | beta-carotene isomerase D27, chloroplastic-like                    |
| 14     | JZ468960            | predicted protein                                                  |
| 15     | JZ468961            | SGT1, putative isoform 1                                           |
| 16     | JZ468962            | uncharacterized protein LOC101246360 isoform 1                     |
| 17     | JZ468963            | acetohydroxyacid synthase                                          |
| 18     | JZ468964            | acetolactate synthase protein                                      |
| 19     | JZ468965            | hypothetical protein CL192Contig1_03                               |
| 20     | JZ468966            | vacuolar protein 8-like                                            |
| 21     | JZ468967            | peptidyl-prolyl cis-trans isomerase FKBP16-4, chloroplastic-like   |
| 22     | JZ468968            | rubisco activase                                                   |
| 23     | JZ468969            | fructose-1,6-bisphosphatase                                        |
| 24     | JZ468970            | No significant similarity                                          |
| 25     | JZ468971            | No significant similarity                                          |
| 26     | JZ468972            | No significant similarity                                          |
| 27     | JZ468973            | hypothetical protein VITISV_009255                                 |
| 28     | JZ468974            | hypothetical protein VITISV_009561                                 |
| 29     | JZ468975            | leukocyte receptor cluster (lrc) member, putative                  |
| 30     | JZ468976            | hypothetical protein VITISV_010970                                 |
| 31     | JZ468977            | predicted protein                                                  |
| 32     | JZ468978            | cysteine-rich receptor-like protein kinase 15-like, partial        |
| 33     | JZ468979            | hypothetical protein OsJ_30144                                     |
| 34     | JZ468980            | predicted protein                                                  |
| 35     | JZ468981            | 17.9 kDa class II heat shock protein                               |
| 36     | JZ468982            | No significant similarity                                          |
| 37     | JZ468983            | unnamed protein product                                            |

**Supplementary material 3: List of up- and down-regulated genes (HE vs WT) with their normalized fold induction and adjusted p value**

| Normalized Fold WT | Fold RAP2-4OE 1 | Fold RAP2-4OE 2 | Normalized Fold RAP2-4OE | Adjusted P value | Gene ID   |
|--------------------|-----------------|-----------------|--------------------------|------------------|-----------|
| 0.00               | 12.51           | 12.54           | 12.52                    | 0.0008           | AT1G56100 |
| 0.00               | 12.95           | 11.69           | 12.32                    | 0.0325           | AT4G15750 |
| 0.00               | 12.10           | 11.70           | 11.90                    | 0.0107           | AT2G42840 |
| 0.00               | 11.04           | 12.30           | 11.67                    | 0.0343           | AT5G20630 |
| 0.00               | 11.29           | 10.83           | 11.06                    | 0.0132           | AT3G20210 |
| 0.00               | 10.21           | 11.52           | 10.86                    | 0.0383           | AT5G07530 |
| 0.00               | 10.32           | 11.03           | 10.67                    | 0.0212           | AT5G45670 |
| 0.00               | 11.21           | 10.08           | 10.64                    | 0.0338           | AT3G08770 |
| 0.00               | 10.87           | 10.35           | 10.61                    | 0.0156           | AT4G29030 |
| 0.00               | 10.21           | 10.74           | 10.47                    | 0.0161           | AT1G24020 |
| 0.00               | 10.28           | 10.07           | 10.18                    | 0.0066           | AT1G72260 |
| 0.00               | 10.50           | 9.64            | 10.07                    | 0.0272           | AT1G06080 |
| 0.00               | 10.37           | 9.57            | 9.97                     | 0.0255           | AT1G61720 |
| 0.00               | 10.15           | 9.50            | 9.82                     | 0.0211           | AT5G33370 |
| 0.00               | 9.34            | 10.29           | 9.81                     | 0.0308           | AT4G12870 |
| 0.00               | 9.90            | 9.14            | 9.52                     | 0.0254           | AT5G47500 |
| 0.00               | 9.81            | 9.17            | 9.49                     | 0.0215           | AT5G49180 |
| 0.00               | 10.06           | 8.87            | 9.46                     | 0.0400           | AT5G39220 |
| 0.00               | 9.75            | 9.14            | 9.44                     | 0.0206           | AT1G11850 |
| 0.00               | 9.34            | 9.40            | 9.37                     | 0.0020           | AT4G14730 |
| 0.00               | 9.77            | 8.93            | 9.35                     | 0.0286           | AT1G16390 |
| 0.00               | 9.32            | 9.29            | 9.30                     | 0.0010           | AT5G50790 |
| 0.00               | 9.22            | 9.35            | 9.29                     | 0.0045           | AT1G71680 |
| 0.00               | 9.95            | 8.54            | 9.25                     | 0.0485           | AT1G13710 |
| 0.00               | 9.64            | 8.85            | 9.24                     | 0.0272           | AT3G54340 |
| 0.00               | 9.37            | 8.81            | 9.09                     | 0.0196           | AT4G12960 |
| 0.00               | 8.54            | 9.41            | 8.97                     | 0.0308           | AT5G42235 |
| 0.00               | 9.61            | 8.28            | 8.95                     | 0.0472           | AT1G11600 |
| 0.00               | 8.75            | 9.13            | 8.94                     | 0.0135           | AT5G21150 |
| 0.00               | 9.19            | 8.69            | 8.94                     | 0.0178           | AT5G22430 |
| 0.00               | 9.18            | 8.60            | 8.89                     | 0.0208           | AT1G19320 |
| 0.00               | 8.88            | 8.86            | 8.87                     | 0.0007           | AT1G53130 |
| 0.00               | 8.74            | 8.85            | 8.79                     | 0.0040           | AT2G38540 |
| 0.00               | 9.16            | 8.34            | 8.75                     | 0.0298           | AT4G33145 |
| 0.00               | 9.05            | 8.43            | 8.74                     | 0.0226           | AT1G72290 |
| 0.00               | 8.40            | 9.09            | 8.74                     | 0.0251           | AT5G01075 |
| 0.00               | 8.63            | 8.80            | 8.72                     | 0.0062           | AT2G10940 |
| 0.00               | 8.40            | 9.02            | 8.71                     | 0.0226           | AT1G71690 |
| 0.00               | 8.46            | 8.94            | 8.70                     | 0.0176           | AT5G08000 |
| 0.00               | 8.08            | 9.17            | 8.63                     | 0.0402           | AT3G04280 |
| 0.00               | 8.66            | 8.56            | 8.61                     | 0.0037           | AT5G51950 |
| 0.00               | 8.38            | 8.76            | 8.57                     | 0.0141           | AT5G09370 |
| 0.00               | 7.98            | 9.14            | 8.56                     | 0.0431           | AT4G12890 |
| 0.00               | 8.94            | 8.18            | 8.56                     | 0.0282           | AT2G46960 |
| 0.00               | 9.02            | 7.93            | 8.47                     | 0.0409           | AT1G26945 |
| 0.00               | 8.44            | 8.46            | 8.45                     | 0.0008           | AT3G16370 |
| 0.00               | 8.46            | 8.35            | 8.41                     | 0.0042           | AT5G24910 |
| 0.00               | 8.15            | 8.53            | 8.34                     | 0.0145           | AT5G55720 |
| 0.00               | 8.21            | 8.42            | 8.32                     | 0.0080           | AT1G10540 |
| 0.00               | 8.49            | 8.08            | 8.29                     | 0.0157           | AT5G47600 |
| 0.00               | 8.62            | 7.91            | 8.27                     | 0.0273           | AT4G22880 |

|      |      |      |      |        |           |
|------|------|------|------|--------|-----------|
| 0.00 | 8.16 | 8.34 | 8.25 | 0.0069 | AT3G25260 |
| 0.00 | 8.60 | 7.89 | 8.25 | 0.0274 | AT5G50335 |
| 0.00 | 8.34 | 8.11 | 8.22 | 0.0089 | AT1G23205 |
| 0.00 | 7.94 | 8.48 | 8.21 | 0.0209 | AT4G32490 |
| 0.00 | 8.06 | 8.31 | 8.18 | 0.0097 | AT3G17600 |
| 0.00 | 7.96 | 8.39 | 8.17 | 0.0167 | AT5G07550 |
| 0.00 | 8.67 | 7.64 | 8.16 | 0.0402 | AT1G71691 |
| 0.00 | 7.70 | 8.58 | 8.14 | 0.0344 | AT2G14247 |
| 0.00 | 8.32 | 7.92 | 8.12 | 0.0157 | AT1G55260 |
| 0.00 | 7.84 | 8.32 | 8.08 | 0.0189 | AT3G12610 |
| 0.00 | 7.80 | 8.34 | 8.07 | 0.0213 | AT5G25460 |
| 0.00 | 8.63 | 7.48 | 8.05 | 0.0454 | AT5G63230 |
| 0.00 | 7.87 | 8.20 | 8.04 | 0.0131 | AT1G73620 |
| 0.00 | 8.00 | 8.02 | 8.01 | 0.0008 | AT3G26140 |
| 0.00 | 7.99 | 7.98 | 7.98 | 0.0004 | AT5G51490 |
| 0.00 | 7.86 | 8.10 | 7.98 | 0.0096 | AT4G11320 |
| 0.00 | 7.54 | 8.41 | 7.97 | 0.0347 | AT4G22870 |
| 0.00 | 7.91 | 8.02 | 7.97 | 0.0044 | AT2G32370 |
| 0.00 | 8.04 | 7.90 | 7.97 | 0.0056 | AT4G29305 |
| 0.00 | 8.10 | 7.72 | 7.91 | 0.0153 | AT1G10640 |
| 0.00 | 7.29 | 8.52 | 7.90 | 0.0494 | AT2G47900 |
| 0.00 | 7.95 | 7.82 | 7.88 | 0.0052 | AT2G04034 |
| 0.00 | 8.28 | 7.43 | 7.86 | 0.0344 | AT4G32170 |
| 0.00 | 8.15 | 7.49 | 7.82 | 0.0268 | AT4G22050 |
| 0.00 | 8.09 | 7.52 | 7.81 | 0.0232 | AT2G42990 |
| 0.00 | 7.98 | 7.60 | 7.79 | 0.0155 | AT4G15160 |
| 0.00 | 7.47 | 8.10 | 7.79 | 0.0257 | AT2G27385 |
| 0.00 | 7.56 | 8.00 | 7.78 | 0.0180 | AT3G14210 |
| 0.00 | 8.19 | 7.37 | 7.78 | 0.0335 | AT4G21080 |
| 0.00 | 7.18 | 8.20 | 7.69 | 0.0422 | AT5G56300 |
| 0.00 | 7.87 | 7.48 | 7.68 | 0.0162 | AT1G51000 |
| 0.00 | 7.67 | 7.68 | 7.67 | 0.0004 | AT4G28365 |
| 0.00 | 7.32 | 7.94 | 7.63 | 0.0259 | AT1G27080 |
| 0.00 | 7.76 | 7.49 | 7.63 | 0.0113 | AT5G24900 |
| 0.00 | 7.14 | 8.06 | 7.60 | 0.0385 | AT2G02147 |
| 0.00 | 8.10 | 7.10 | 7.60 | 0.0418 | AT5G55320 |
| 0.00 | 7.84 | 7.33 | 7.59 | 0.0214 | AT4G16590 |
| 0.00 | 7.66 | 7.49 | 7.57 | 0.0071 | AT5G60140 |
| 0.00 | 7.91 | 7.20 | 7.56 | 0.0299 | AT4G39330 |
| 0.00 | 7.20 | 7.91 | 7.56 | 0.0299 | AT4G09960 |
| 0.00 | 7.91 | 7.19 | 7.55 | 0.0303 | AT3G25750 |
| 0.00 | 7.25 | 7.83 | 7.54 | 0.0245 | AT1G61095 |
| 0.00 | 7.39 | 7.68 | 7.54 | 0.0122 | AT4G26590 |
| 0.00 | 7.98 | 7.09 | 7.53 | 0.0376 | AT1G26796 |
| 0.00 | 8.00 | 7.06 | 7.53 | 0.0397 | AT2G33880 |
| 0.00 | 7.61 | 7.42 | 7.51 | 0.0080 | AT1G23240 |
| 0.00 | 7.69 | 7.32 | 7.50 | 0.0157 | AT2G35310 |
| 0.00 | 7.25 | 7.73 | 7.49 | 0.0204 | AT4G35725 |
| 0.00 | 7.21 | 7.76 | 7.49 | 0.0234 | AT1G80660 |
| 0.00 | 7.32 | 7.64 | 7.48 | 0.0136 | AT4G22400 |
| 0.00 | 7.66 | 7.29 | 7.48 | 0.0158 | AT1G49800 |
| 0.00 | 6.98 | 7.97 | 7.48 | 0.0421 | AT5G46950 |
| 0.00 | 7.15 | 7.79 | 7.47 | 0.0273 | AT1G12570 |
| 0.00 | 7.66 | 7.27 | 7.47 | 0.0166 | AT2G27880 |
| 0.00 | 7.52 | 7.41 | 7.46 | 0.0047 | AT1G50310 |
| 0.00 | 7.57 | 7.34 | 7.46 | 0.0098 | AT5G44440 |
| 0.00 | 7.32 | 7.54 | 7.43 | 0.0094 | AT1G51035 |
| 0.00 | 6.90 | 7.95 | 7.42 | 0.0449 | AT3G60670 |
| 0.00 | 7.91 | 6.94 | 7.42 | 0.0415 | AT4G14750 |

|      |      |      |      |        |           |
|------|------|------|------|--------|-----------|
| 0.00 | 7.81 | 7.01 | 7.41 | 0.0343 | AT1G48195 |
| 0.00 | 7.49 | 7.32 | 7.41 | 0.0073 | AT2G42830 |
| 0.00 | 7.14 | 7.62 | 7.38 | 0.0207 | AT4G36740 |
| 0.00 | 6.93 | 7.82 | 7.37 | 0.0384 | AT1G04645 |
| 0.00 | 7.85 | 6.85 | 7.35 | 0.0432 | AT5G19700 |
| 0.00 | 7.22 | 7.48 | 7.35 | 0.0113 | AT5G01790 |
| 0.00 | 7.76 | 6.86 | 7.31 | 0.0391 | AT3G52780 |
| 0.00 | 7.41 | 7.20 | 7.31 | 0.0091 | AT5G07160 |
| 0.00 | 7.07 | 7.53 | 7.30 | 0.0201 | AT3G24280 |
| 0.00 | 7.61 | 6.96 | 7.29 | 0.0284 | AT1G20730 |
| 0.00 | 7.62 | 6.95 | 7.28 | 0.0293 | AT4G27420 |
| 0.00 | 7.77 | 6.77 | 7.27 | 0.0437 | AT1G15360 |
| 0.00 | 7.60 | 6.90 | 7.25 | 0.0307 | AT1G70560 |
| 0.00 | 7.31 | 7.13 | 7.22 | 0.0079 | AT1G52695 |
| 0.00 | 7.25 | 7.18 | 7.22 | 0.0031 | AT2G04925 |
| 0.00 | 6.96 | 7.43 | 7.20 | 0.0208 | AT1G43710 |
| 0.00 | 7.26 | 7.13 | 7.19 | 0.0058 | AT3G05600 |
| 0.00 | 7.19 | 7.16 | 7.18 | 0.0013 | AT4G00870 |
| 0.00 | 6.91 | 7.42 | 7.16 | 0.0226 | AT5G24780 |
| 0.00 | 6.60 | 7.71 | 7.15 | 0.0493 | AT2G41990 |
| 0.00 | 7.18 | 7.09 | 7.13 | 0.0040 | AT4G32714 |
| 0.00 | 6.98 | 7.29 | 7.13 | 0.0138 | AT1G43666 |
| 0.00 | 6.75 | 7.50 | 7.12 | 0.0335 | AT3G10570 |
| 0.00 | 7.25 | 6.99 | 7.12 | 0.0116 | AT5G49170 |
| 0.00 | 7.10 | 7.13 | 7.12 | 0.0013 | AT2G34700 |
| 0.00 | 6.67 | 7.56 | 7.12 | 0.0398 | AT1G62500 |
| 0.00 | 7.26 | 6.97 | 7.11 | 0.0130 | AT5G58400 |
| 0.00 | 7.36 | 6.83 | 7.09 | 0.0238 | AT2G42885 |
| 0.00 | 7.00 | 7.15 | 7.08 | 0.0067 | AT5G22460 |
| 0.00 | 6.53 | 7.62 | 7.08 | 0.0489 | AT5G27200 |
| 0.00 | 7.28 | 6.79 | 7.04 | 0.0222 | AT1G04150 |
| 0.00 | 6.51 | 7.56 | 7.03 | 0.0474 | AT2G12480 |
| 0.00 | 7.40 | 6.60 | 7.00 | 0.0287 | AT1G34580 |
| 0.00 | 6.64 | 7.29 | 6.97 | 0.0297 | AT5G63180 |
| 0.00 | 6.50 | 7.42 | 6.96 | 0.0420 | AT2G19802 |
| 0.00 | 7.23 | 6.66 | 6.95 | 0.0261 | AT5G24355 |
| 0.00 | 6.95 | 6.93 | 6.94 | 0.0009 | AT2G25060 |
| 0.00 | 7.47 | 6.41 | 6.94 | 0.0485 | AT1G77780 |
| 0.00 | 6.96 | 6.91 | 6.94 | 0.0023 | AT5G47150 |
| 0.00 | 6.71 | 7.14 | 6.93 | 0.0198 | AT3G21860 |
| 0.00 | 6.41 | 7.44 | 6.93 | 0.0473 | AT5G63250 |
| 0.00 | 7.21 | 6.63 | 6.92 | 0.0267 | AT5G61412 |
| 0.00 | 7.06 | 6.78 | 6.92 | 0.0129 | AT1G26799 |
| 0.00 | 6.89 | 6.93 | 6.91 | 0.0018 | AT1G61090 |
| 0.00 | 6.65 | 7.13 | 6.89 | 0.0222 | AT5G38180 |
| 0.00 | 7.42 | 6.35 | 6.89 | 0.0494 | AT5G15720 |
| 0.00 | 7.26 | 6.51 | 6.88 | 0.0346 | AT2G42110 |
| 0.00 | 6.59 | 7.16 | 6.88 | 0.0264 | AT5G60553 |
| 0.00 | 7.00 | 6.74 | 6.87 | 0.0120 | AT2G40610 |
| 0.00 | 6.78 | 6.95 | 6.86 | 0.0079 | AT4G15210 |
| 0.00 | 7.38 | 6.34 | 6.86 | 0.0482 | AT5G44630 |
| 0.00 | 6.91 | 6.80 | 6.85 | 0.0051 | AT1G15150 |
| 0.00 | 6.52 | 7.18 | 6.85 | 0.0306 | AT4G26790 |
| 0.00 | 6.37 | 7.32 | 6.84 | 0.0441 | AT5G07540 |
| 0.00 | 7.11 | 6.50 | 6.81 | 0.0285 | AT3G10780 |
| 0.00 | 7.16 | 6.46 | 6.81 | 0.0327 | AT4G30130 |
| 0.00 | 6.90 | 6.69 | 6.79 | 0.0098 | AT4G26420 |
| 0.00 | 6.96 | 6.60 | 6.78 | 0.0169 | AT4G12825 |
| 0.00 | 6.28 | 7.27 | 6.77 | 0.0464 | AT1G65450 |

|      |      |      |      |        |           |
|------|------|------|------|--------|-----------|
| 0.00 | 6.66 | 6.88 | 6.77 | 0.0103 | AT1G12845 |
| 0.00 | 6.66 | 6.86 | 6.76 | 0.0094 | AT3G60700 |
| 0.00 | 6.91 | 6.58 | 6.75 | 0.0156 | AT5G08460 |
| 0.00 | 6.45 | 7.03 | 6.74 | 0.0274 | AT1G09790 |
| 0.00 | 6.80 | 6.66 | 6.73 | 0.0066 | AT2G21465 |
| 0.00 | 6.72 | 6.74 | 6.73 | 0.0009 | AT5G50740 |
| 0.00 | 7.15 | 6.25 | 6.70 | 0.0427 | AT4G28780 |
| 0.00 | 6.95 | 6.43 | 6.69 | 0.0247 | AT3G20750 |
| 0.00 | 6.40 | 6.95 | 6.68 | 0.0262 | AT3G12000 |
| 0.00 | 6.41 | 6.93 | 6.67 | 0.0248 | AT5G15230 |
| 0.00 | 6.72 | 6.60 | 6.66 | 0.0057 | AT5G18000 |
| 0.00 | 6.24 | 7.06 | 6.65 | 0.0392 | AT5G24410 |
| 0.00 | 6.89 | 6.40 | 6.64 | 0.0235 | AT1G31310 |
| 0.00 | 6.76 | 6.53 | 6.64 | 0.0110 | AT4G33790 |
| 0.00 | 6.75 | 6.50 | 6.63 | 0.0120 | AT3G43960 |
| 0.00 | 6.91 | 6.32 | 6.61 | 0.0284 | AT1G17200 |
| 0.00 | 6.73 | 6.49 | 6.61 | 0.0116 | AT5G07030 |
| 0.00 | 6.14 | 7.07 | 6.61 | 0.0496 | AT2G02000 |
| 0.00 | 6.52 | 6.68 | 6.60 | 0.0077 | AT5G38970 |
| 0.00 | 6.26 | 6.93 | 6.59 | 0.0323 | AT5G15780 |
| 0.00 | 6.70 | 6.48 | 6.59 | 0.0106 | AT2G24310 |
| 0.00 | 6.31 | 6.86 | 6.59 | 0.0266 | AT3G23130 |
| 0.00 | 6.91 | 6.26 | 6.58 | 0.0314 | AT4G17480 |
| 0.00 | 7.01 | 6.15 | 6.58 | 0.0415 | AT3G19200 |
| 0.00 | 6.55 | 6.58 | 6.56 | 0.0015 | AT1G21395 |
| 0.00 | 6.33 | 6.77 | 6.55 | 0.0214 | AT1G28170 |
| 0.00 | 6.89 | 6.20 | 6.54 | 0.0335 | AT3G62610 |
| 0.00 | 6.76 | 6.32 | 6.54 | 0.0214 | AT5G38960 |
| 0.00 | 6.14 | 6.92 | 6.53 | 0.0380 | AT5G43760 |
| 0.00 | 6.62 | 6.42 | 6.52 | 0.0098 | AT5G13930 |
| 0.00 | 6.02 | 7.01 | 6.52 | 0.0483 | AT3G05980 |
| 0.00 | 6.42 | 6.60 | 6.51 | 0.0088 | AT5G48100 |
| 0.00 | 6.31 | 6.70 | 6.51 | 0.0191 | AT1G78950 |
| 0.00 | 6.90 | 6.08 | 6.49 | 0.0402 | AT4G14695 |
| 0.00 | 6.33 | 6.64 | 6.48 | 0.0152 | AT3G42830 |
| 0.00 | 6.32 | 6.64 | 6.48 | 0.0157 | AT4G22105 |
| 0.00 | 6.80 | 6.16 | 6.48 | 0.0314 | AT2G20870 |
| 0.00 | 6.88 | 6.08 | 6.48 | 0.0392 | AT1G05280 |
| 0.00 | 6.06 | 6.87 | 6.47 | 0.0398 | AT1G09370 |
| 0.00 | 6.54 | 6.38 | 6.46 | 0.0079 | AT3G13370 |
| 0.00 | 6.77 | 6.10 | 6.44 | 0.0331 | AT1G43640 |
| 0.00 | 6.46 | 6.40 | 6.43 | 0.0030 | AT1G12170 |
| 0.00 | 6.20 | 6.65 | 6.43 | 0.0223 | AT3G13540 |
| 0.00 | 6.18 | 6.67 | 6.42 | 0.0243 | AT1G58430 |
| 0.00 | 6.60 | 6.24 | 6.42 | 0.0178 | AT1G49770 |
| 0.00 | 5.97 | 6.87 | 6.42 | 0.0446 | AT1G48930 |
| 0.00 | 6.55 | 6.27 | 6.41 | 0.0139 | AT1G66100 |
| 0.00 | 6.18 | 6.63 | 6.40 | 0.0224 | AT5G49100 |
| 0.00 | 6.33 | 6.47 | 6.40 | 0.0070 | AT5G23212 |
| 0.00 | 6.24 | 6.56 | 6.40 | 0.0159 | AT3G50870 |
| 0.00 | 6.70 | 6.09 | 6.40 | 0.0303 | AT1G13130 |
| 0.00 | 6.49 | 6.29 | 6.39 | 0.0100 | AT5G25090 |
| 0.00 | 6.13 | 6.64 | 6.38 | 0.0254 | AT2G41240 |
| 0.00 | 6.43 | 6.30 | 6.37 | 0.0065 | AT3G21800 |
| 0.00 | 6.35 | 6.38 | 6.37 | 0.0015 | AT4G31840 |
| 0.00 | 6.01 | 6.73 | 6.37 | 0.0359 | AT5G17090 |
| 0.00 | 6.26 | 6.46 | 6.36 | 0.0100 | AT4G23600 |
| 0.00 | 6.19 | 6.52 | 6.36 | 0.0165 | AT2G41225 |
| 0.00 | 5.95 | 6.76 | 6.36 | 0.0405 | AT3G12870 |



|      |      |      |      |        |           |
|------|------|------|------|--------|-----------|
| 0.00 | 6.11 | 6.60 | 6.35 | 0.0245 | AT5G48900 |
| 0.00 | 5.94 | 6.75 | 6.35 | 0.0406 | AT3G06868 |
| 0.00 | 5.97 | 6.72 | 6.35 | 0.0376 | AT5G11360 |
| 0.00 | 6.49 | 6.19 | 6.34 | 0.0151 | AT3G50990 |
| 0.00 | 6.17 | 6.50 | 6.34 | 0.0166 | AT1G75580 |
| 0.00 | 6.76 | 5.91 | 6.34 | 0.0426 | AT1G06360 |
| 0.00 | 6.42 | 6.25 | 6.34 | 0.0085 | AT3G01323 |
| 0.00 | 5.87 | 6.76 | 6.32 | 0.0448 | AT5G50480 |
| 0.00 | 6.70 | 5.92 | 6.31 | 0.0393 | AT1G47990 |
| 0.00 | 6.52 | 6.09 | 6.31 | 0.0217 | AT4G10603 |
| 0.00 | 6.53 | 6.07 | 6.30 | 0.0232 | AT2G42720 |
| 0.00 | 5.93 | 6.67 | 6.30 | 0.0373 | AT3G03850 |
| 0.00 | 6.21 | 6.37 | 6.29 | 0.0081 | AT3G61950 |
| 0.00 | 6.41 | 6.14 | 6.28 | 0.0137 | AT5G53390 |
| 0.00 | 6.21 | 6.34 | 6.28 | 0.0066 | AT1G28590 |
| 0.00 | 5.84 | 6.69 | 6.26 | 0.0431 | AT5G61850 |
| 0.00 | 6.57 | 5.95 | 6.26 | 0.0315 | AT5G46690 |
| 0.00 | 5.91 | 6.60 | 6.25 | 0.0351 | AT2G02515 |
| 0.00 | 6.22 | 6.25 | 6.24 | 0.0015 | AT2G02990 |
| 0.00 | 6.29 | 6.16 | 6.23 | 0.0066 | AT5G20740 |
| 0.00 | 5.78 | 6.66 | 6.22 | 0.0450 | AT5G19730 |
| 0.00 | 6.12 | 6.30 | 6.21 | 0.0092 | AT1G53520 |
| 0.00 | 6.55 | 5.86 | 6.21 | 0.0354 | AT5G15530 |
| 0.00 | 6.42 | 5.99 | 6.21 | 0.0220 | AT4G10850 |
| 0.00 | 6.37 | 6.03 | 6.20 | 0.0175 | AT5G54067 |
| 0.00 | 6.58 | 5.81 | 6.20 | 0.0395 | AT3G01327 |
| 0.00 | 5.83 | 6.55 | 6.19 | 0.0370 | AT3G17155 |
| 0.00 | 6.08 | 6.29 | 6.19 | 0.0108 | AT2G47930 |
| 0.00 | 6.29 | 6.07 | 6.18 | 0.0113 | AT3G16895 |
| 0.00 | 6.39 | 5.96 | 6.18 | 0.0222 | AT4G33355 |
| 0.00 | 5.91 | 6.44 | 6.18 | 0.0273 | AT3G05960 |
| 0.00 | 5.91 | 6.44 | 6.17 | 0.0273 | AT1G49640 |
| 0.00 | 6.11 | 6.24 | 6.17 | 0.0067 | AT3G20520 |
| 0.00 | 6.19 | 6.15 | 6.17 | 0.0021 | AT4G39510 |
| 0.00 | 5.75 | 6.60 | 6.17 | 0.0437 | AT1G16705 |
| 0.00 | 6.20 | 6.14 | 6.17 | 0.0031 | AT5G07990 |
| 0.00 | 6.08 | 6.22 | 6.15 | 0.0072 | AT1G78760 |
| 0.00 | 5.96 | 6.33 | 6.15 | 0.0192 | AT4G39917 |
| 0.00 | 5.88 | 6.40 | 6.14 | 0.0269 | AT5G59845 |
| 0.00 | 5.93 | 6.35 | 6.14 | 0.0218 | AT2G04570 |
| 0.00 | 6.16 | 6.11 | 6.13 | 0.0026 | AT5G12940 |
| 0.00 | 6.00 | 6.27 | 6.13 | 0.0140 | AT4G18970 |
| 0.00 | 5.76 | 6.51 | 6.13 | 0.0389 | AT4G22115 |
| 0.00 | 6.05 | 6.21 | 6.13 | 0.0083 | AT1G09380 |
| 0.00 | 6.53 | 5.72 | 6.12 | 0.0420 | AT3G29152 |
| 0.00 | 5.86 | 6.38 | 6.12 | 0.0270 | AT1G17190 |
| 0.00 | 6.51 | 5.73 | 6.12 | 0.0405 | AT3G20030 |
| 0.00 | 5.67 | 6.56 | 6.11 | 0.0462 | AT3G17130 |
| 0.00 | 6.08 | 6.11 | 6.10 | 0.0016 | AT4G18960 |
| 0.00 | 5.64 | 6.55 | 6.10 | 0.0474 | AT2G37640 |
| 0.00 | 6.49 | 5.69 | 6.09 | 0.0418 | AT1G61097 |
| 0.00 | 6.46 | 5.72 | 6.09 | 0.0386 | AT3G12970 |
| 0.00 | 5.91 | 6.26 | 6.09 | 0.0183 | AT3G18470 |
| 0.00 | 6.48 | 5.69 | 6.09 | 0.0413 | AT3G05470 |
| 0.00 | 6.40 | 5.76 | 6.08 | 0.0335 | AT3G12880 |
| 0.00 | 6.50 | 5.66 | 6.08 | 0.0439 | AT1G67775 |
| 0.00 | 5.70 | 6.43 | 6.07 | 0.0383 | AT5G45950 |
| 0.00 | 6.52 | 5.61 | 6.06 | 0.0477 | AT4G20670 |
| 0.00 | 5.68 | 6.42 | 6.05 | 0.0389 | AT5G01420 |

|      |      |      |      |        |           |
|------|------|------|------|--------|-----------|
| 0.00 | 6.41 | 5.67 | 6.04 | 0.0389 | AT3G61970 |
| 0.00 | 6.06 | 5.96 | 6.01 | 0.0053 | AT2G29790 |
| 0.00 | 6.34 | 5.68 | 6.01 | 0.0349 | AT2G30810 |
| 0.00 | 6.34 | 5.64 | 5.99 | 0.0372 | AT1G80100 |
| 0.00 | 5.50 | 6.44 | 5.97 | 0.0500 | AT1G12064 |
| 0.00 | 6.24 | 5.70 | 5.97 | 0.0288 | AT4G21040 |
| 0.00 | 5.93 | 6.00 | 5.97 | 0.0037 | AT3G22142 |
| 0.00 | 6.27 | 5.64 | 5.96 | 0.0336 | AT1G22090 |
| 0.00 | 5.97 | 5.94 | 5.95 | 0.0016 | AT2G37380 |
| 0.00 | 6.15 | 5.68 | 5.92 | 0.0253 | AT1G60987 |
| 0.00 | 6.04 | 5.76 | 5.90 | 0.0151 | AT1G31040 |
| 0.00 | 6.03 | 5.77 | 5.90 | 0.0140 | AT3G54550 |
| 0.00 | 6.09 | 5.70 | 5.90 | 0.0211 | AT2G38995 |
| 0.00 | 6.15 | 5.64 | 5.89 | 0.0275 | AT2G40475 |
| 0.00 | 5.80 | 5.94 | 5.87 | 0.0076 | AT5G08640 |
| 0.00 | 5.77 | 5.97 | 5.87 | 0.0108 | AT1G75900 |
| 0.00 | 6.07 | 5.65 | 5.86 | 0.0228 | AT1G78170 |
| 0.00 | 6.16 | 5.55 | 5.86 | 0.0331 | AT5G38197 |
| 0.00 | 6.25 | 5.44 | 5.85 | 0.0440 | AT4G22430 |
| 0.00 | 5.56 | 6.12 | 5.84 | 0.0305 | AT2G20825 |
| 0.00 | 5.62 | 6.01 | 5.81 | 0.0213 | AT1G02810 |
| 0.00 | 6.13 | 5.50 | 5.81 | 0.0345 | AT3G24690 |
| 0.00 | 5.62 | 6.01 | 5.81 | 0.0213 | AT5G13170 |
| 0.00 | 6.23 | 5.38 | 5.81 | 0.0465 | AT1G59670 |
| 0.00 | 5.68 | 5.92 | 5.80 | 0.0132 | AT2G28040 |
| 0.00 | 5.96 | 5.62 | 5.79 | 0.0187 | AT1G75930 |
| 0.00 | 5.41 | 6.16 | 5.78 | 0.0412 | AT5G01180 |
| 0.00 | 6.10 | 5.45 | 5.78 | 0.0358 | AT1G52030 |
| 0.00 | 5.62 | 5.92 | 5.77 | 0.0165 | AT2G38530 |
| 0.00 | 5.35 | 6.18 | 5.76 | 0.0457 | AT4G10290 |
| 0.00 | 5.70 | 5.82 | 5.76 | 0.0066 | AT3G05800 |
| 0.00 | 6.15 | 5.35 | 5.75 | 0.0442 | AT1G45191 |
| 0.00 | 5.37 | 6.11 | 5.74 | 0.0410 | AT4G02830 |
| 0.00 | 6.13 | 5.34 | 5.74 | 0.0438 | AT1G08985 |
| 0.00 | 5.86 | 5.61 | 5.74 | 0.0139 | AT3G23450 |
| 0.00 | 5.48 | 5.96 | 5.72 | 0.0267 | AT3G22000 |
| 0.00 | 5.74 | 5.69 | 5.72 | 0.0028 | AT2G28790 |
| 0.00 | 5.49 | 5.95 | 5.72 | 0.0256 | AT5G26250 |
| 0.00 | 5.64 | 5.78 | 5.71 | 0.0078 | AT1G67750 |
| 0.00 | 6.05 | 5.36 | 5.71 | 0.0385 | AT2G16220 |
| 0.00 | 5.78 | 5.60 | 5.69 | 0.0101 | AT4G03945 |
| 0.00 | 5.55 | 5.83 | 5.69 | 0.0157 | AT4G11140 |
| 0.00 | 6.13 | 5.26 | 5.69 | 0.0485 | AT4G13380 |
| 0.00 | 5.73 | 5.63 | 5.68 | 0.0056 | AT4G20940 |
| 0.00 | 5.51 | 5.85 | 5.68 | 0.0190 | AT5G12270 |
| 0.00 | 5.46 | 5.89 | 5.68 | 0.0241 | AT2G41340 |
| 0.00 | 5.24 | 6.11 | 5.68 | 0.0487 | AT3G22120 |
| 0.00 | 6.10 | 5.23 | 5.67 | 0.0488 | AT3G05460 |
| 0.00 | 5.40 | 5.91 | 5.65 | 0.0287 | AT3G48300 |
| 0.00 | 6.06 | 5.22 | 5.64 | 0.0473 | AT1G68500 |
| 0.00 | 5.43 | 5.84 | 5.63 | 0.0231 | AT1G65060 |
| 0.00 | 5.90 | 5.36 | 5.63 | 0.0305 | AT1G28360 |
| 0.00 | 5.80 | 5.45 | 5.62 | 0.0198 | AT1G44110 |
| 0.00 | 5.38 | 5.84 | 5.61 | 0.0261 | AT3G29370 |
| 0.00 | 5.91 | 5.31 | 5.61 | 0.0340 | AT5G61120 |
| 0.00 | 5.62 | 5.59 | 5.61 | 0.0017 | AT3G48510 |
| 0.00 | 5.28 | 5.93 | 5.60 | 0.0369 | AT4G30610 |
| 0.00 | 5.69 | 5.51 | 5.60 | 0.0102 | AT5G53840 |
| 0.00 | 5.23 | 5.96 | 5.60 | 0.0415 | AT5G14000 |

|      |      |      |      |        |           |
|------|------|------|------|--------|-----------|
| 0.00 | 5.70 | 5.50 | 5.60 | 0.0114 | AT5G62110 |
| 0.00 | 5.83 | 5.36 | 5.59 | 0.0267 | AT2G34870 |
| 0.00 | 5.43 | 5.76 | 5.59 | 0.0188 | AT3G53530 |
| 0.00 | 5.45 | 5.74 | 5.59 | 0.0165 | AT5G47590 |
| 0.00 | 5.21 | 5.97 | 5.59 | 0.0432 | AT4G29580 |
| 0.00 | 5.59 | 5.58 | 5.58 | 0.0006 | AT1G79840 |
| 0.00 | 5.15 | 6.01 | 5.58 | 0.0490 | AT2G42590 |
| 0.00 | 5.65 | 5.51 | 5.58 | 0.0080 | AT3G10720 |
| 0.00 | 5.19 | 5.97 | 5.58 | 0.0444 | AT5G66700 |
| 0.00 | 5.37 | 5.79 | 5.58 | 0.0239 | AT1G20240 |
| 0.00 | 5.46 | 5.69 | 5.57 | 0.0131 | AT2G02540 |
| 0.00 | 5.87 | 5.26 | 5.57 | 0.0349 | AT2G17310 |
| 0.00 | 5.73 | 5.40 | 5.57 | 0.0189 | AT5G12460 |
| 0.00 | 5.39 | 5.72 | 5.55 | 0.0189 | AT1G67040 |
| 0.00 | 5.68 | 5.42 | 5.55 | 0.0149 | AT2G45470 |
| 0.00 | 5.54 | 5.55 | 5.55 | 0.0006 | AT3G54940 |
| 0.00 | 5.34 | 5.75 | 5.55 | 0.0235 | AT5G39560 |
| 0.00 | 5.64 | 5.43 | 5.54 | 0.0121 | AT3G58100 |
| 0.00 | 5.37 | 5.65 | 5.51 | 0.0162 | AT1G44760 |
| 0.00 | 5.42 | 5.60 | 5.51 | 0.0104 | AT1G58055 |
| 0.00 | 5.76 | 5.25 | 5.50 | 0.0295 | AT5G07280 |
| 0.00 | 5.72 | 5.28 | 5.50 | 0.0255 | AT1G65710 |
| 0.00 | 5.28 | 5.71 | 5.49 | 0.0249 | AT3G60000 |
| 0.00 | 5.76 | 5.22 | 5.49 | 0.0313 | AT2G36724 |
| 0.00 | 5.54 | 5.43 | 5.48 | 0.0064 | AT5G57920 |
| 0.00 | 5.16 | 5.80 | 5.48 | 0.0371 | AT5G07260 |
| 0.00 | 5.69 | 5.24 | 5.46 | 0.0262 | AT1G27220 |
| 0.00 | 5.80 | 5.10 | 5.45 | 0.0408 | AT3G29040 |
| 0.00 | 5.51 | 5.39 | 5.45 | 0.0070 | AT3G01140 |
| 0.00 | 5.45 | 5.45 | 5.45 | 0.0000 | AT1G51030 |
| 0.00 | 5.72 | 5.16 | 5.44 | 0.0327 | AT1G04380 |
| 0.00 | 5.34 | 5.53 | 5.44 | 0.0111 | AT2G23800 |
| 0.00 | 5.19 | 5.63 | 5.41 | 0.0259 | AT1G77525 |
| 0.00 | 5.71 | 5.09 | 5.40 | 0.0365 | AT5G17430 |
| 0.00 | 5.30 | 5.49 | 5.40 | 0.0112 | AT1G74670 |
| 0.00 | 5.51 | 5.29 | 5.40 | 0.0130 | AT1G71250 |
| 0.00 | 5.31 | 5.46 | 5.39 | 0.0089 | AT5G18290 |
| 0.00 | 5.34 | 5.41 | 5.37 | 0.0041 | AT5G23530 |
| 0.00 | 5.40 | 5.34 | 5.37 | 0.0036 | AT5G22580 |
| 0.00 | 5.23 | 5.50 | 5.36 | 0.0160 | AT1G23200 |
| 0.00 | 5.41 | 5.30 | 5.36 | 0.0065 | AT5G09970 |
| 0.00 | 5.59 | 5.12 | 5.35 | 0.0279 | AT1G04520 |
| 0.00 | 5.23 | 5.47 | 5.35 | 0.0143 | AT5G07200 |
| 0.00 | 5.70 | 4.97 | 5.34 | 0.0435 | AT5G47920 |
| 0.00 | 5.14 | 5.53 | 5.33 | 0.0233 | AT1G12030 |
| 0.00 | 5.11 | 5.55 | 5.33 | 0.0263 | AT4G09090 |
| 0.00 | 5.20 | 5.46 | 5.33 | 0.0155 | AT1G44830 |
| 0.00 | 5.55 | 5.11 | 5.33 | 0.0263 | AT2G30432 |
| 0.00 | 5.50 | 5.15 | 5.32 | 0.0209 | AT1G05490 |
| 0.00 | 5.21 | 5.43 | 5.32 | 0.0132 | AT4G01500 |
| 0.00 | 5.71 | 4.92 | 5.32 | 0.0472 | AT2G22620 |
| 0.00 | 5.21 | 5.39 | 5.30 | 0.0108 | AT3G02480 |
| 0.00 | 5.33 | 5.26 | 5.30 | 0.0042 | AT5G66590 |
| 0.00 | 5.61 | 4.98 | 5.30 | 0.0378 | AT2G20463 |
| 0.00 | 5.34 | 5.25 | 5.30 | 0.0054 | AT5G43020 |
| 0.00 | 5.58 | 5.01 | 5.30 | 0.0342 | AT5G66330 |
| 0.00 | 5.63 | 4.95 | 5.29 | 0.0409 | AT2G42860 |
| 0.00 | 5.24 | 5.33 | 5.29 | 0.0054 | AT1G70720 |
| 0.00 | 5.17 | 5.40 | 5.28 | 0.0139 | AT5G37810 |

|      |      |      |      |        |           |
|------|------|------|------|--------|-----------|
| 0.00 | 5.00 | 5.57 | 5.28 | 0.0343 | AT5G63240 |
| 0.00 | 5.33 | 5.23 | 5.28 | 0.0060 | AT5G51210 |
| 0.00 | 5.37 | 5.19 | 5.28 | 0.0109 | AT3G20395 |
| 0.00 | 5.32 | 5.24 | 5.28 | 0.0048 | AT3G27835 |
| 0.00 | 5.44 | 5.11 | 5.28 | 0.0199 | AT5G45960 |
| 0.00 | 5.08 | 5.46 | 5.27 | 0.0229 | AT5G03120 |
| 0.00 | 5.57 | 4.97 | 5.27 | 0.0362 | AT4G01080 |
| 0.00 | 5.02 | 5.52 | 5.27 | 0.0302 | AT5G40040 |
| 0.00 | 4.88 | 5.66 | 5.27 | 0.0470 | AT3G48231 |
| 0.00 | 5.38 | 5.16 | 5.27 | 0.0133 | AT4G02290 |
| 0.00 | 5.24 | 5.29 | 5.26 | 0.0030 | AT1G01600 |
| 0.00 | 4.93 | 5.59 | 5.26 | 0.0399 | AT1G24010 |
| 0.00 | 5.02 | 5.49 | 5.26 | 0.0285 | AT4G27550 |
| 0.00 | 5.41 | 5.10 | 5.25 | 0.0188 | AT1G78220 |
| 0.00 | 5.49 | 5.01 | 5.25 | 0.0291 | AT4G00400 |
| 0.00 | 5.05 | 5.42 | 5.24 | 0.0225 | AT4G05630 |
| 0.00 | 5.25 | 5.22 | 5.24 | 0.0018 | AT1G64670 |
| 0.00 | 5.07 | 5.40 | 5.24 | 0.0201 | AT5G02580 |
| 0.00 | 4.85 | 5.61 | 5.23 | 0.0462 | AT3G17010 |
| 0.00 | 5.40 | 5.07 | 5.23 | 0.0201 | AT1G68905 |
| 0.00 | 4.92 | 5.54 | 5.23 | 0.0377 | AT3G42725 |
| 0.00 | 5.51 | 4.95 | 5.23 | 0.0341 | AT3G23140 |
| 0.00 | 4.90 | 5.56 | 5.23 | 0.0401 | AT2G01520 |
| 0.00 | 5.17 | 5.27 | 5.22 | 0.0061 | AT3G21420 |
| 0.00 | 4.93 | 5.50 | 5.22 | 0.0348 | AT3G25670 |
| 0.00 | 5.20 | 5.22 | 5.21 | 0.0012 | AT5G56430 |
| 0.00 | 5.23 | 5.16 | 5.19 | 0.0043 | AT1G02070 |
| 0.00 | 5.33 | 5.03 | 5.18 | 0.0184 | AT4G17810 |
| 0.00 | 5.01 | 5.35 | 5.18 | 0.0209 | AT4G24275 |
| 0.00 | 5.15 | 5.20 | 5.18 | 0.0031 | AT3G14760 |
| 0.00 | 5.07 | 5.27 | 5.17 | 0.0123 | AT5G55132 |
| 0.00 | 5.24 | 5.10 | 5.17 | 0.0086 | AT5G09730 |
| 0.00 | 5.22 | 5.11 | 5.17 | 0.0068 | AT1G12090 |
| 0.00 | 5.35 | 4.96 | 5.15 | 0.0241 | AT1G13755 |
| 0.00 | 4.99 | 5.32 | 5.15 | 0.0204 | AT4G13790 |
| 0.00 | 5.31 | 4.98 | 5.15 | 0.0204 | AT2G40170 |
| 0.00 | 5.39 | 4.91 | 5.15 | 0.0296 | AT4G28310 |
| 0.00 | 5.23 | 5.05 | 5.14 | 0.0111 | AT5G42800 |
| 0.00 | 5.17 | 5.10 | 5.13 | 0.0043 | AT5G50360 |
| 0.00 | 5.41 | 4.86 | 5.13 | 0.0341 | AT3G06840 |
| 0.00 | 5.23 | 5.04 | 5.13 | 0.0118 | AT3G21410 |
| 0.00 | 4.80 | 5.43 | 5.12 | 0.0392 | AT5G19175 |
| 0.00 | 5.09 | 5.13 | 5.11 | 0.0025 | AT1G30920 |
| 0.00 | 5.49 | 4.73 | 5.11 | 0.0473 | AT5G32619 |
| 0.00 | 4.97 | 5.25 | 5.11 | 0.0174 | AT2G13610 |
| 0.00 | 4.80 | 5.40 | 5.10 | 0.0374 | AT4G12900 |
| 0.00 | 4.98 | 5.23 | 5.10 | 0.0156 | AT4G29285 |
| 0.00 | 4.96 | 5.24 | 5.10 | 0.0175 | AT4G02330 |
| 0.00 | 4.89 | 5.30 | 5.09 | 0.0256 | AT1G01110 |
| 0.00 | 5.10 | 5.08 | 5.09 | 0.0013 | AT5G42223 |
| 0.00 | 4.91 | 5.25 | 5.08 | 0.0213 | AT3G14190 |
| 0.00 | 4.89 | 5.27 | 5.08 | 0.0238 | AT5G44680 |
| 0.00 | 5.34 | 4.81 | 5.08 | 0.0332 | AT4G14120 |
| 0.00 | 5.28 | 4.88 | 5.08 | 0.0251 | AT4G34510 |
| 0.00 | 5.21 | 4.94 | 5.08 | 0.0169 | AT1G68460 |
| 0.00 | 4.99 | 5.14 | 5.06 | 0.0094 | AT5G67110 |
| 0.00 | 5.32 | 4.81 | 5.06 | 0.0320 | AT1G30795 |
| 0.00 | 5.26 | 4.85 | 5.06 | 0.0258 | AT2G03770 |
| 0.00 | 4.97 | 5.14 | 5.05 | 0.0107 | AT1G72970 |

|      |      |      |      |        |           |
|------|------|------|------|--------|-----------|
| 0.00 | 4.69 | 5.41 | 5.05 | 0.0453 | AT4G14330 |
| 0.00 | 4.68 | 5.41 | 5.05 | 0.0460 | AT3G56520 |
| 0.00 | 5.21 | 4.88 | 5.04 | 0.0208 | AT5G60970 |
| 0.00 | 5.06 | 5.03 | 5.04 | 0.0019 | AT5G39860 |
| 0.00 | 5.18 | 4.89 | 5.04 | 0.0183 | AT1G79060 |
| 0.00 | 5.08 | 4.97 | 5.03 | 0.0070 | AT1G50110 |
| 0.00 | 4.91 | 5.14 | 5.02 | 0.0146 | AT4G15480 |
| 0.00 | 5.02 | 5.01 | 5.01 | 0.0006 | AT2G42540 |
| 0.00 | 5.11 | 4.91 | 5.01 | 0.0127 | AT5G05220 |
| 0.00 | 5.16 | 4.84 | 5.00 | 0.0204 | AT4G33220 |
| 0.00 | 4.76 | 5.23 | 4.99 | 0.0299 | AT3G21620 |
| 0.00 | 4.95 | 5.00 | 4.98 | 0.0032 | AT3G17760 |
| 0.00 | 4.64 | 5.31 | 4.97 | 0.0428 | AT1G61255 |
| 0.00 | 4.71 | 5.23 | 4.97 | 0.0333 | AT5G62170 |
| 0.00 | 4.97 | 4.97 | 4.97 | 0.0000 | AT4G29150 |
| 0.00 | 4.86 | 5.06 | 4.96 | 0.0128 | AT3G63430 |
| 0.00 | 4.96 | 4.96 | 4.96 | 0.0000 | AT5G66580 |
| 0.00 | 5.00 | 4.92 | 4.96 | 0.0051 | AT4G00180 |
| 0.00 | 5.29 | 4.62 | 4.96 | 0.0430 | AT3G21840 |
| 0.00 | 5.01 | 4.90 | 4.95 | 0.0071 | AT5G13140 |
| 0.00 | 4.96 | 4.94 | 4.95 | 0.0013 | AT3G25980 |
| 0.00 | 4.93 | 4.97 | 4.95 | 0.0026 | AT1G18250 |
| 0.00 | 5.24 | 4.66 | 4.95 | 0.0373 | AT1G23410 |
| 0.00 | 4.84 | 5.05 | 4.95 | 0.0135 | AT4G29360 |
| 0.00 | 4.84 | 5.04 | 4.94 | 0.0129 | AT5G17340 |
| 0.00 | 4.81 | 5.06 | 4.94 | 0.0161 | AT2G14620 |
| 0.00 | 4.63 | 5.24 | 4.93 | 0.0393 | AT1G53282 |
| 0.00 | 5.13 | 4.71 | 4.92 | 0.0272 | AT1G52690 |
| 0.00 | 5.25 | 4.58 | 4.91 | 0.0433 | AT3G21500 |
| 0.00 | 4.67 | 5.16 | 4.91 | 0.0317 | AT4G27330 |
| 0.00 | 4.69 | 5.14 | 4.91 | 0.0291 | AT3G01325 |
| 0.00 | 5.06 | 4.77 | 4.91 | 0.0188 | AT4G10490 |
| 0.00 | 4.62 | 5.20 | 4.91 | 0.0376 | AT3G18360 |
| 0.00 | 5.25 | 4.56 | 4.91 | 0.0447 | AT5G42230 |
| 0.00 | 4.71 | 5.09 | 4.90 | 0.0247 | AT2G31980 |
| 0.00 | 4.63 | 5.17 | 4.90 | 0.0350 | AT2G18500 |
| 0.00 | 5.12 | 4.67 | 4.89 | 0.0292 | AT4G37810 |
| 0.00 | 5.11 | 4.66 | 4.89 | 0.0293 | AT4G37950 |
| 0.00 | 5.16 | 4.61 | 4.88 | 0.0358 | AT2G37720 |
| 0.00 | 4.81 | 4.96 | 4.88 | 0.0098 | AT5G59040 |
| 0.00 | 4.97 | 4.80 | 4.88 | 0.0111 | AT5G56120 |
| 0.00 | 4.93 | 4.83 | 4.88 | 0.0065 | AT5G41720 |
| 0.00 | 5.17 | 4.59 | 4.88 | 0.0378 | AT5G46795 |
| 0.00 | 4.92 | 4.84 | 4.88 | 0.0052 | AT1G24590 |
| 0.00 | 4.51 | 5.24 | 4.87 | 0.0476 | AT1G28030 |
| 0.00 | 4.93 | 4.82 | 4.87 | 0.0072 | AT3G48540 |
| 0.00 | 5.23 | 4.51 | 4.87 | 0.0470 | AT1G20500 |
| 0.00 | 5.02 | 4.71 | 4.87 | 0.0203 | AT5G02890 |
| 0.00 | 4.83 | 4.90 | 4.87 | 0.0046 | AT5G06020 |
| 0.00 | 5.11 | 4.62 | 4.87 | 0.0320 | AT1G05260 |
| 0.00 | 4.53 | 5.19 | 4.86 | 0.0432 | AT4G19940 |
| 0.00 | 4.67 | 5.05 | 4.86 | 0.0249 | AT5G18030 |
| 0.00 | 5.12 | 4.59 | 4.86 | 0.0347 | AT1G70270 |
| 0.00 | 4.89 | 4.81 | 4.85 | 0.0053 | AT5G16250 |
| 0.00 | 4.49 | 5.19 | 4.84 | 0.0460 | AT1G23590 |
| 0.00 | 4.94 | 4.73 | 4.84 | 0.0138 | AT3G03820 |
| 0.00 | 5.21 | 4.46 | 4.84 | 0.0493 | AT3G16670 |
| 0.00 | 5.15 | 4.52 | 4.84 | 0.0414 | AT4G13968 |
| 0.00 | 4.62 | 5.04 | 4.83 | 0.0277 | AT3G02640 |

|      |      |      |      |        |           |
|------|------|------|------|--------|-----------|
| 0.00 | 4.88 | 4.78 | 4.83 | 0.0066 | AT5G20240 |
| 0.00 | 5.17 | 4.47 | 4.82 | 0.0461 | AT5G54400 |
| 0.00 | 4.93 | 4.71 | 4.82 | 0.0145 | AT1G08560 |
| 0.00 | 5.16 | 4.47 | 4.81 | 0.0455 | AT5G60630 |
| 0.00 | 4.61 | 5.01 | 4.81 | 0.0265 | AT5G62850 |
| 0.00 | 4.90 | 4.72 | 4.81 | 0.0119 | AT4G32717 |
| 0.00 | 5.01 | 4.60 | 4.81 | 0.0271 | AT3G17520 |
| 0.00 | 4.69 | 4.91 | 4.80 | 0.0146 | AT5G14690 |
| 0.00 | 4.88 | 4.71 | 4.80 | 0.0113 | AT4G25830 |
| 0.00 | 4.44 | 5.14 | 4.79 | 0.0464 | AT2G45050 |
| 0.00 | 4.70 | 4.88 | 4.79 | 0.0120 | AT5G56320 |
| 0.00 | 4.53 | 5.04 | 4.79 | 0.0339 | AT3G06220 |
| 0.00 | 4.99 | 4.57 | 4.78 | 0.0280 | AT1G05540 |
| 0.00 | 4.67 | 4.88 | 4.78 | 0.0140 | AT5G23940 |
| 0.00 | 4.87 | 4.68 | 4.77 | 0.0127 | AT3G56220 |
| 0.00 | 4.47 | 5.07 | 4.77 | 0.0400 | AT4G32540 |
| 0.00 | 4.59 | 4.95 | 4.77 | 0.0240 | AT1G67265 |
| 0.00 | 4.87 | 4.65 | 4.76 | 0.0147 | AT1G13607 |
| 0.00 | 4.56 | 4.95 | 4.76 | 0.0261 | AT4G09500 |
| 0.00 | 5.12 | 4.39 | 4.76 | 0.0488 | AT4G35670 |
| 0.00 | 4.93 | 4.58 | 4.75 | 0.0234 | AT1G49190 |
| 0.00 | 5.01 | 4.49 | 4.75 | 0.0348 | AT5G06150 |
| 0.00 | 4.48 | 5.01 | 4.75 | 0.0355 | AT3G46320 |
| 0.00 | 4.64 | 4.85 | 4.74 | 0.0141 | AT3G27810 |
| 0.00 | 4.44 | 5.04 | 4.74 | 0.0402 | AT5G37940 |
| 0.00 | 4.68 | 4.80 | 4.74 | 0.0081 | AT3G56370 |
| 0.00 | 4.56 | 4.91 | 4.73 | 0.0235 | AT5G48360 |
| 0.00 | 4.89 | 4.55 | 4.72 | 0.0229 | AT5G17220 |
| 0.00 | 4.94 | 4.49 | 4.72 | 0.0304 | AT3G61172 |
| 0.00 | 4.48 | 4.95 | 4.71 | 0.0317 | AT1G62340 |
| 0.00 | 4.74 | 4.68 | 4.71 | 0.0041 | AT1G73550 |
| 0.00 | 5.00 | 4.42 | 4.71 | 0.0391 | AT1G73325 |
| 0.00 | 4.46 | 4.94 | 4.70 | 0.0325 | AT3G51290 |
| 0.00 | 4.70 | 4.69 | 4.70 | 0.0007 | AT2G16630 |
| 0.00 | 4.80 | 4.59 | 4.70 | 0.0142 | AT2G05790 |
| 0.00 | 4.38 | 5.01 | 4.69 | 0.0426 | AT3G48350 |
| 0.00 | 4.43 | 4.94 | 4.69 | 0.0346 | AT3G48550 |
| 0.00 | 4.67 | 4.71 | 4.69 | 0.0027 | AT1G60590 |
| 0.00 | 4.72 | 4.63 | 4.68 | 0.0061 | AT4G39070 |
| 0.00 | 4.60 | 4.74 | 4.67 | 0.0095 | AT5G18010 |
| 0.00 | 4.42 | 4.92 | 4.67 | 0.0340 | AT1G54840 |
| 0.00 | 4.86 | 4.48 | 4.67 | 0.0259 | AT3G11160 |
| 0.00 | 4.50 | 4.84 | 4.67 | 0.0232 | AT5G18050 |
| 0.00 | 4.38 | 4.95 | 4.67 | 0.0388 | AT2G22345 |
| 0.00 | 4.60 | 4.74 | 4.67 | 0.0095 | AT4G16165 |
| 0.00 | 4.73 | 4.60 | 4.66 | 0.0089 | AT3G25050 |
| 0.00 | 4.39 | 4.93 | 4.66 | 0.0368 | AT4G39650 |
| 0.00 | 4.97 | 4.34 | 4.65 | 0.0430 | AT1G13230 |
| 0.00 | 4.92 | 4.39 | 4.65 | 0.0362 | AT1G03710 |
| 0.00 | 4.29 | 5.01 | 4.65 | 0.0492 | AT5G15580 |
| 0.00 | 4.74 | 4.56 | 4.65 | 0.0123 | AT4G36350 |
| 0.00 | 4.75 | 4.55 | 4.65 | 0.0137 | AT1G24650 |
| 0.00 | 4.38 | 4.91 | 4.65 | 0.0363 | AT1G53070 |
| 0.00 | 4.69 | 4.59 | 4.64 | 0.0069 | AT1G02730 |
| 0.00 | 4.57 | 4.71 | 4.64 | 0.0096 | AT2G40670 |
| 0.00 | 4.86 | 4.42 | 4.64 | 0.0302 | AT1G75890 |
| 0.00 | 4.68 | 4.59 | 4.63 | 0.0062 | AT1G32780 |
| 0.00 | 4.70 | 4.57 | 4.63 | 0.0089 | AT4G38000 |
| 0.00 | 4.91 | 4.36 | 4.63 | 0.0377 | AT4G27890 |



|      |      |      |      |        |           |
|------|------|------|------|--------|-----------|
| 0.00 | 4.59 | 4.66 | 4.63 | 0.0048 | AT3G28290 |
| 0.00 | 4.72 | 4.54 | 4.63 | 0.0124 | AT3G51280 |
| 0.00 | 4.59 | 4.65 | 4.62 | 0.0041 | AT1G14900 |
| 0.00 | 4.66 | 4.57 | 4.62 | 0.0062 | AT1G65090 |
| 0.00 | 4.60 | 4.64 | 4.62 | 0.0028 | AT5G66230 |
| 0.00 | 4.44 | 4.79 | 4.62 | 0.0241 | AT3G01490 |
| 0.00 | 4.95 | 4.29 | 4.62 | 0.0454 | AT2G34210 |
| 0.00 | 4.59 | 4.63 | 4.61 | 0.0028 | AT1G77520 |
| 0.00 | 4.87 | 4.33 | 4.60 | 0.0373 | AT2G26695 |
| 0.00 | 4.32 | 4.88 | 4.60 | 0.0387 | AT2G37700 |
| 0.00 | 4.50 | 4.70 | 4.60 | 0.0138 | AT2G16580 |
| 0.00 | 4.36 | 4.82 | 4.59 | 0.0319 | AT3G09950 |
| 0.00 | 4.75 | 4.43 | 4.59 | 0.0222 | AT5G59870 |
| 0.00 | 4.46 | 4.71 | 4.59 | 0.0174 | AT4G37980 |
| 0.00 | 4.26 | 4.91 | 4.59 | 0.0451 | AT1G68450 |
| 0.00 | 4.28 | 4.89 | 4.58 | 0.0423 | AT5G36710 |
| 0.00 | 4.50 | 4.66 | 4.58 | 0.0111 | AT1G29195 |
| 0.00 | 4.67 | 4.49 | 4.58 | 0.0125 | AT5G17500 |
| 0.00 | 4.90 | 4.26 | 4.58 | 0.0444 | AT2G21420 |
| 0.00 | 4.68 | 4.46 | 4.57 | 0.0153 | AT4G18570 |
| 0.00 | 4.35 | 4.79 | 4.57 | 0.0306 | AT1G29490 |
| 0.00 | 4.86 | 4.25 | 4.56 | 0.0426 | AT4G13840 |
| 0.00 | 4.42 | 4.68 | 4.55 | 0.0182 | AT1G47395 |
| 0.00 | 4.32 | 4.78 | 4.55 | 0.0322 | AT5G51560 |
| 0.00 | 4.60 | 4.50 | 4.55 | 0.0070 | AT2G14900 |
| 0.00 | 4.33 | 4.74 | 4.54 | 0.0288 | AT5G38170 |
| 0.00 | 4.45 | 4.61 | 4.53 | 0.0112 | AT5G19060 |
| 0.00 | 5.17 | 3.89 | 4.53 | 0.0347 | AT1G09510 |
| 0.00 | 4.27 | 4.79 | 4.53 | 0.0365 | AT3G27710 |
| 0.00 | 4.43 | 4.63 | 4.53 | 0.0141 | AT4G25480 |
| 0.00 | 4.22 | 4.83 | 4.52 | 0.0428 | AT2G03190 |
| 0.00 | 4.50 | 4.54 | 4.52 | 0.0028 | AT5G18080 |
| 0.00 | 4.46 | 4.58 | 4.52 | 0.0085 | AT5G13400 |
| 0.00 | 4.39 | 4.64 | 4.51 | 0.0176 | AT5G02540 |
| 0.00 | 4.55 | 4.46 | 4.51 | 0.0064 | AT1G70710 |
| 0.00 | 4.81 | 4.20 | 4.51 | 0.0430 | AT1G63100 |
| 0.00 | 4.25 | 4.75 | 4.50 | 0.0353 | AT2G22000 |
| 0.00 | 4.72 | 4.28 | 4.50 | 0.0311 | AT3G17480 |
| 0.00 | 4.45 | 4.55 | 4.50 | 0.0071 | AT1G80370 |
| 0.00 | 4.68 | 4.30 | 4.49 | 0.0269 | AT5G55730 |
| 0.00 | 4.76 | 4.22 | 4.49 | 0.0382 | AT3G01324 |
| 0.00 | 4.23 | 4.73 | 4.48 | 0.0355 | AT5G11130 |
| 0.00 | 4.48 | 4.47 | 4.47 | 0.0007 | AT5G18060 |
| 0.00 | 4.59 | 4.35 | 4.47 | 0.0171 | AT5G15000 |
| 0.00 | 4.21 | 4.73 | 4.47 | 0.0370 | AT3G03130 |
| 0.00 | 4.20 | 4.74 | 4.47 | 0.0384 | AT4G02800 |
| 0.00 | 4.75 | 4.18 | 4.47 | 0.0406 | AT4G23290 |
| 0.00 | 4.17 | 4.76 | 4.46 | 0.0420 | AT3G42473 |
| 0.00 | 4.51 | 4.41 | 4.46 | 0.0071 | AT1G76500 |
| 0.00 | 4.54 | 4.37 | 4.45 | 0.0121 | AT5G42910 |
| 0.00 | 4.11 | 4.79 | 4.45 | 0.0485 | AT4G12617 |
| 0.00 | 4.78 | 4.12 | 4.45 | 0.0471 | AT2G03290 |
| 0.00 | 4.35 | 4.54 | 4.45 | 0.0136 | AT4G17280 |
| 0.00 | 4.21 | 4.65 | 4.43 | 0.0316 | AT5G46940 |
| 0.00 | 4.25 | 4.59 | 4.42 | 0.0245 | AT3G11520 |
| 0.00 | 4.75 | 4.08 | 4.42 | 0.0482 | AT4G37490 |
| 0.00 | 4.68 | 4.15 | 4.42 | 0.0382 | AT1G27250 |
| 0.00 | 4.10 | 4.72 | 4.41 | 0.0447 | AT1G23570 |
| 0.00 | 4.17 | 4.64 | 4.41 | 0.0339 | AT3G61177 |

|      |      |      |      |        |           |
|------|------|------|------|--------|-----------|
| 0.00 | 4.70 | 4.10 | 4.40 | 0.0433 | AT2G16270 |
| 0.00 | 4.67 | 4.13 | 4.40 | 0.0390 | AT2G03933 |
| 0.00 | 4.08 | 4.72 | 4.40 | 0.0462 | AT3G26010 |
| 0.00 | 4.17 | 4.61 | 4.39 | 0.0319 | AT2G25270 |
| 0.00 | 4.33 | 4.43 | 4.38 | 0.0073 | AT3G10510 |
| 0.00 | 4.06 | 4.70 | 4.38 | 0.0464 | AT5G55340 |
| 0.00 | 4.23 | 4.53 | 4.38 | 0.0218 | AT3G05180 |
| 0.00 | 4.38 | 4.38 | 4.38 | 0.0000 | AT3G04300 |
| 0.00 | 4.38 | 4.36 | 4.37 | 0.0015 | AT3G63200 |
| 0.00 | 4.41 | 4.33 | 4.37 | 0.0058 | AT5G35550 |
| 0.00 | 4.20 | 4.53 | 4.36 | 0.0241 | AT2G17620 |
| 0.00 | 4.32 | 4.39 | 4.36 | 0.0051 | AT5G19172 |
| 0.00 | 4.10 | 4.61 | 4.36 | 0.0372 | AT5G41900 |
| 0.00 | 4.07 | 4.63 | 4.35 | 0.0409 | AT3G48240 |
| 0.00 | 4.63 | 4.07 | 4.35 | 0.0409 | AT4G12910 |
| 0.00 | 4.16 | 4.53 | 4.34 | 0.0271 | AT3G11825 |
| 0.00 | 4.23 | 4.46 | 4.34 | 0.0168 | AT5G56369 |
| 0.00 | 4.50 | 4.18 | 4.34 | 0.0235 | AT3G61550 |
| 0.00 | 4.65 | 4.03 | 4.34 | 0.0454 | AT4G12140 |
| 0.00 | 4.35 | 4.32 | 4.34 | 0.0022 | AT1G34245 |
| 0.00 | 4.56 | 4.10 | 4.33 | 0.0338 | AT2G45130 |
| 0.00 | 4.49 | 4.18 | 4.33 | 0.0228 | AT5G06030 |
| 0.00 | 4.17 | 4.47 | 4.32 | 0.0221 | AT3G20820 |
| 0.00 | 4.00 | 4.64 | 4.32 | 0.0471 | AT2G33690 |
| 0.00 | 4.39 | 4.25 | 4.32 | 0.0103 | AT3G21310 |
| 0.00 | 4.15 | 4.48 | 4.32 | 0.0243 | AT5G23400 |
| 0.00 | 4.43 | 4.19 | 4.31 | 0.0177 | AT3G54060 |
| 0.00 | 4.19 | 4.43 | 4.31 | 0.0177 | AT3G03450 |
| 0.00 | 3.97 | 4.62 | 4.30 | 0.0481 | AT5G65390 |
| 0.00 | 4.05 | 4.54 | 4.29 | 0.0363 | AT2G33850 |
| 0.00 | 4.45 | 4.14 | 4.29 | 0.0230 | AT1G47610 |
| 0.00 | 4.11 | 4.46 | 4.28 | 0.0260 | AT4G19980 |
| 0.00 | 4.14 | 4.42 | 4.28 | 0.0208 | AT4G29650 |
| 0.00 | 4.07 | 4.49 | 4.28 | 0.0312 | AT1G07610 |
| 0.00 | 4.11 | 4.45 | 4.28 | 0.0253 | AT4G33270 |
| 0.00 | 3.97 | 4.58 | 4.28 | 0.0453 | AT3G11180 |
| 0.00 | 4.52 | 4.03 | 4.28 | 0.0364 | AT5G22940 |
| 0.00 | 4.30 | 4.24 | 4.27 | 0.0045 | AT2G36050 |
| 0.00 | 3.95 | 4.58 | 4.27 | 0.0469 | AT3G12470 |
| 0.00 | 4.01 | 4.52 | 4.27 | 0.0380 | AT2G14365 |
| 0.00 | 4.11 | 4.41 | 4.26 | 0.0224 | AT3G20260 |
| 0.00 | 4.21 | 4.30 | 4.26 | 0.0067 | AT5G64080 |
| 0.00 | 4.08 | 4.44 | 4.26 | 0.0269 | AT2G41230 |
| 0.00 | 4.39 | 4.08 | 4.23 | 0.0233 | AT4G24973 |
| 0.00 | 4.51 | 3.93 | 4.22 | 0.0437 | AT4G39630 |
| 0.00 | 4.35 | 4.08 | 4.21 | 0.0204 | AT3G02110 |
| 0.00 | 4.35 | 4.07 | 4.21 | 0.0212 | AT4G00210 |
| 0.00 | 3.92 | 4.50 | 4.21 | 0.0438 | AT5G51480 |
| 0.00 | 4.01 | 4.40 | 4.20 | 0.0295 | AT2G20515 |
| 0.00 | 4.42 | 3.99 | 4.20 | 0.0325 | AT2G23260 |
| 0.00 | 4.20 | 4.20 | 4.20 | 0.0000 | AT3G61175 |
| 0.00 | 4.13 | 4.26 | 4.20 | 0.0099 | AT3G25290 |
| 0.00 | 4.03 | 4.36 | 4.19 | 0.0250 | AT5G40630 |
| 0.00 | 4.01 | 4.37 | 4.19 | 0.0273 | AT5G13060 |
| 0.00 | 4.10 | 4.27 | 4.19 | 0.0129 | AT2G32765 |
| 0.00 | 4.60 | 3.77 | 4.19 | 0.0267 | AT2G36190 |
| 0.00 | 4.18 | 4.18 | 4.18 | 0.0000 | AT5G63085 |
| 0.00 | 4.13 | 4.20 | 4.16 | 0.0053 | AT2G17723 |
| 0.00 | 4.43 | 3.90 | 4.16 | 0.0405 | AT3G46490 |

|      |      |      |      |        |           |
|------|------|------|------|--------|-----------|
| 0.00 | 4.15 | 4.17 | 4.16 | 0.0015 | AT5G57123 |
| 0.00 | 4.24 | 4.07 | 4.16 | 0.0130 | AT1G18370 |
| 0.00 | 3.97 | 4.34 | 4.15 | 0.0283 | AT4G33550 |
| 0.00 | 4.17 | 4.14 | 4.15 | 0.0023 | AT1G78500 |
| 0.00 | 4.36 | 3.94 | 4.15 | 0.0322 | AT2G36270 |
| 0.00 | 4.39 | 3.91 | 4.15 | 0.0368 | AT1G34355 |
| 0.00 | 4.03 | 4.26 | 4.15 | 0.0177 | AT3G50620 |
| 0.00 | 4.31 | 3.99 | 4.15 | 0.0245 | AT1G79720 |
| 0.00 | 3.97 | 4.32 | 4.14 | 0.0269 | AT3G55646 |
| 0.00 | 4.07 | 4.22 | 4.14 | 0.0115 | AT4G29280 |
| 0.00 | 4.17 | 4.10 | 4.13 | 0.0054 | AT3G09930 |
| 0.00 | 4.01 | 4.25 | 4.13 | 0.0185 | AT4G31890 |
| 0.00 | 4.04 | 4.22 | 4.13 | 0.0139 | AT2G36560 |
| 0.00 | 4.13 | 4.12 | 4.13 | 0.0008 | AT3G10590 |
| 0.00 | 3.86 | 4.39 | 4.13 | 0.0408 | AT2G45400 |
| 0.00 | 4.17 | 4.07 | 4.12 | 0.0077 | AT5G50750 |
| 0.00 | 4.20 | 4.04 | 4.12 | 0.0124 | AT3G28860 |
| 0.00 | 4.06 | 4.17 | 4.11 | 0.0085 | AT5G65730 |
| 0.00 | 3.85 | 4.38 | 4.11 | 0.0409 | AT4G37800 |
| 0.00 | 4.23 | 3.99 | 4.11 | 0.0186 | AT3G50740 |
| 0.00 | 4.35 | 3.87 | 4.11 | 0.0371 | AT5G23650 |
| 0.00 | 4.21 | 4.00 | 4.11 | 0.0163 | AT4G27260 |
| 0.00 | 4.16 | 4.05 | 4.10 | 0.0085 | AT1G49475 |
| 0.00 | 4.22 | 3.99 | 4.10 | 0.0178 | AT3G55660 |
| 0.00 | 4.05 | 4.14 | 4.10 | 0.0070 | AT1G49430 |
| 0.00 | 3.86 | 4.33 | 4.09 | 0.0365 | AT4G16230 |
| 0.00 | 4.11 | 4.08 | 4.09 | 0.0023 | AT3G54180 |
| 0.00 | 4.07 | 4.11 | 4.09 | 0.0031 | AT1G05440 |
| 0.00 | 4.41 | 3.77 | 4.09 | 0.0497 | AT4G18310 |
| 0.00 | 4.00 | 4.17 | 4.09 | 0.0132 | AT3G21945 |
| 0.00 | 3.99 | 4.18 | 4.09 | 0.0148 | AT2G37390 |
| 0.00 | 3.79 | 4.38 | 4.09 | 0.0459 | AT5G18430 |
| 0.00 | 4.22 | 3.94 | 4.08 | 0.0218 | AT5G50490 |
| 0.00 | 3.86 | 4.29 | 4.07 | 0.0336 | AT3G02120 |
| 0.00 | 4.36 | 3.79 | 4.07 | 0.0445 | AT2G30730 |
| 0.00 | 3.79 | 4.35 | 4.07 | 0.0437 | AT1G34640 |
| 0.00 | 3.90 | 4.24 | 4.07 | 0.0266 | AT1G19970 |
| 0.00 | 3.96 | 4.17 | 4.07 | 0.0164 | AT4G16447 |
| 0.00 | 3.77 | 4.34 | 4.06 | 0.0447 | AT4G11810 |
| 0.00 | 4.18 | 3.92 | 4.05 | 0.0204 | AT3G50020 |
| 0.00 | 3.84 | 4.26 | 4.05 | 0.0330 | AT2G32990 |
| 0.00 | 4.27 | 3.82 | 4.05 | 0.0354 | AT4G32980 |
| 0.00 | 4.12 | 3.96 | 4.04 | 0.0126 | AT1G68907 |
| 0.00 | 4.05 | 4.03 | 4.04 | 0.0016 | AT4G18920 |
| 0.00 | 3.93 | 4.14 | 4.04 | 0.0166 | AT1G10190 |
| 0.00 | 4.24 | 3.83 | 4.03 | 0.0323 | AT4G13080 |
| 0.00 | 4.16 | 3.91 | 4.03 | 0.0197 | AT1G33811 |
| 0.00 | 4.22 | 3.83 | 4.03 | 0.0308 | AT2G22200 |
| 0.00 | 3.82 | 4.23 | 4.03 | 0.0324 | AT3G59890 |
| 0.00 | 4.04 | 4.01 | 4.02 | 0.0024 | AT1G17560 |
| 0.00 | 3.80 | 4.23 | 4.01 | 0.0341 | AT4G03965 |
| 0.00 | 3.92 | 4.11 | 4.01 | 0.0151 | AT5G57780 |
| 0.00 | 3.90 | 4.13 | 4.01 | 0.0182 | AT5G48480 |
| 0.00 | 3.96 | 4.07 | 4.01 | 0.0087 | AT5G18020 |
| 0.00 | 4.19 | 3.83 | 4.01 | 0.0286 | AT1G23500 |
| 0.00 | 3.71 | 4.32 | 4.01 | 0.0483 | AT4G23496 |
| 0.00 | 4.02 | 4.00 | 4.01 | 0.0016 | AT5G08730 |
| 0.00 | 3.99 | 4.03 | 4.01 | 0.0032 | AT3G55710 |
| 0.00 | 4.05 | 3.96 | 4.01 | 0.0072 | AT5G55520 |

|      |      |      |      |        |           |
|------|------|------|------|--------|-----------|
| 0.00 | 4.05 | 3.95 | 4.00 | 0.0080 | AT5G44640 |
| 0.00 | 4.13 | 3.87 | 4.00 | 0.0207 | AT2G43870 |
| 0.00 | 4.08 | 3.91 | 4.00 | 0.0135 | AT2G37300 |
| 0.00 | 3.74 | 4.25 | 4.00 | 0.0406 | AT1G22330 |
| 0.00 | 4.15 | 3.83 | 3.99 | 0.0255 | AT4G32890 |
| 0.00 | 3.68 | 4.30 | 3.99 | 0.0494 | AT3G45140 |
| 0.00 | 3.89 | 4.08 | 3.99 | 0.0152 | AT5G01015 |
| 0.00 | 4.03 | 3.94 | 3.98 | 0.0072 | AT1G48990 |
| 0.00 | 3.94 | 4.02 | 3.98 | 0.0064 | AT1G65900 |
| 0.00 | 4.27 | 3.68 | 3.98 | 0.0472 | AT3G17680 |
| 0.00 | 4.07 | 3.89 | 3.98 | 0.0144 | AT2G47880 |
| 0.00 | 4.11 | 3.84 | 3.98 | 0.0216 | AT5G03860 |
| 0.00 | 3.67 | 4.28 | 3.98 | 0.0488 | AT5G62340 |
| 0.00 | 3.73 | 4.21 | 3.97 | 0.0384 | AT4G29570 |
| 0.00 | 4.17 | 3.76 | 3.97 | 0.0329 | AT2G18420 |
| 0.00 | 4.12 | 3.82 | 3.97 | 0.0240 | AT4G02700 |
| 0.00 | 4.00 | 3.94 | 3.97 | 0.0048 | AT1G58270 |
| 0.00 | 4.06 | 3.87 | 3.97 | 0.0153 | AT4G10630 |
| 0.00 | 3.74 | 4.17 | 3.96 | 0.0346 | AT1G29440 |
| 0.00 | 3.75 | 4.14 | 3.95 | 0.0314 | AT3G43083 |
| 0.00 | 4.05 | 3.83 | 3.94 | 0.0178 | AT4G22390 |
| 0.00 | 3.91 | 3.98 | 3.94 | 0.0056 | AT4G14770 |
| 0.00 | 3.75 | 4.13 | 3.94 | 0.0307 | AT3G15357 |
| 0.00 | 3.86 | 4.02 | 3.94 | 0.0129 | AT5G62280 |
| 0.00 | 3.81 | 4.07 | 3.94 | 0.0210 | AT5G26230 |
| 0.00 | 3.69 | 4.17 | 3.93 | 0.0388 | AT5G66780 |
| 0.00 | 3.93 | 3.93 | 3.93 | 0.0000 | AT2G29290 |
| 0.00 | 3.78 | 4.07 | 3.93 | 0.0235 | AT1G72670 |
| 0.00 | 4.03 | 3.82 | 3.92 | 0.0170 | AT5G03870 |
| 0.00 | 3.66 | 4.18 | 3.92 | 0.0422 | AT3G61898 |
| 0.00 | 3.69 | 4.14 | 3.92 | 0.0365 | AT3G46940 |
| 0.00 | 3.62 | 4.21 | 3.92 | 0.0479 | AT5G38160 |
| 0.00 | 3.77 | 4.07 | 3.92 | 0.0243 | AT4G03010 |
| 0.00 | 3.67 | 4.16 | 3.92 | 0.0398 | AT5G04150 |
| 0.00 | 4.11 | 3.72 | 3.91 | 0.0317 | AT5G45850 |
| 0.00 | 3.70 | 4.13 | 3.91 | 0.0349 | AT3G09870 |
| 0.00 | 4.11 | 3.71 | 3.91 | 0.0325 | AT2G44000 |
| 0.00 | 3.75 | 4.07 | 3.91 | 0.0260 | AT3G13175 |
| 0.00 | 3.97 | 3.85 | 3.91 | 0.0098 | AT5G58500 |
| 0.00 | 4.19 | 3.62 | 3.90 | 0.0464 | AT5G26850 |
| 0.00 | 3.83 | 3.94 | 3.88 | 0.0090 | AT1G72210 |
| 0.00 | 3.99 | 3.77 | 3.88 | 0.0180 | AT5G44950 |
| 0.00 | 3.68 | 4.06 | 3.87 | 0.0312 | AT4G11290 |
| 0.00 | 3.67 | 4.07 | 3.87 | 0.0329 | AT4G20240 |
| 0.00 | 3.68 | 4.05 | 3.87 | 0.0304 | AT3G25100 |
| 0.00 | 3.79 | 3.94 | 3.87 | 0.0124 | AT1G27030 |
| 0.00 | 3.84 | 3.89 | 3.86 | 0.0041 | AT4G29610 |
| 0.00 | 3.98 | 3.75 | 3.86 | 0.0189 | AT1G23600 |
| 0.00 | 3.94 | 3.78 | 3.86 | 0.0132 | AT4G24130 |
| 0.00 | 3.91 | 3.80 | 3.86 | 0.0091 | AT1G56580 |
| 0.00 | 3.79 | 3.93 | 3.86 | 0.0115 | AT2G26180 |
| 0.00 | 3.70 | 4.01 | 3.85 | 0.0256 | AT5G39240 |
| 0.00 | 3.92 | 3.79 | 3.85 | 0.0107 | AT1G48940 |
| 0.00 | 3.88 | 3.82 | 3.85 | 0.0050 | AT2G38760 |
| 0.00 | 3.80 | 3.90 | 3.85 | 0.0083 | AT4G28430 |
| 0.00 | 3.84 | 3.86 | 3.85 | 0.0017 | AT4G23870 |
| 0.00 | 3.94 | 3.76 | 3.85 | 0.0149 | AT3G61490 |
| 0.00 | 4.01 | 3.69 | 3.85 | 0.0264 | AT2G10535 |
| 0.00 | 3.78 | 3.91 | 3.84 | 0.0108 | AT2G04170 |

|      |      |      |      |        |           |
|------|------|------|------|--------|-----------|
| 0.00 | 3.85 | 3.82 | 3.84 | 0.0025 | AT3G01960 |
| 0.00 | 3.62 | 4.05 | 3.83 | 0.0357 | AT2G18890 |
| 0.00 | 3.78 | 3.88 | 3.83 | 0.0083 | AT5G45650 |
| 0.00 | 3.94 | 3.72 | 3.83 | 0.0183 | AT4G35690 |
| 0.00 | 4.01 | 3.65 | 3.83 | 0.0299 | AT2G45420 |
| 0.00 | 3.61 | 4.04 | 3.83 | 0.0357 | AT4G31290 |
| 0.00 | 4.10 | 3.55 | 3.83 | 0.0457 | AT5G08505 |
| 0.00 | 3.89 | 3.75 | 3.82 | 0.0117 | AT2G36570 |
| 0.00 | 3.96 | 3.68 | 3.82 | 0.0233 | AT2G37740 |
| 0.00 | 3.98 | 3.65 | 3.82 | 0.0275 | AT5G50760 |
| 0.00 | 3.90 | 3.72 | 3.81 | 0.0150 | AT1G12010 |
| 0.00 | 3.63 | 3.99 | 3.81 | 0.0301 | AT5G46540 |
| 0.00 | 3.94 | 3.66 | 3.80 | 0.0234 | AT1G07795 |
| 0.00 | 3.52 | 4.08 | 3.80 | 0.0468 | AT5G51600 |
| 0.00 | 4.09 | 3.51 | 3.80 | 0.0485 | AT5G59105 |
| 0.00 | 3.99 | 3.60 | 3.80 | 0.0327 | AT5G39160 |
| 0.00 | 3.80 | 3.79 | 3.80 | 0.0008 | AT5G63140 |
| 0.00 | 4.01 | 3.58 | 3.79 | 0.0360 | AT3G52810 |
| 0.00 | 3.71 | 3.86 | 3.79 | 0.0126 | AT3G09190 |
| 0.00 | 3.63 | 3.94 | 3.79 | 0.0261 | AT3G54710 |
| 0.00 | 3.53 | 4.04 | 3.79 | 0.0428 | AT3G52630 |
| 0.00 | 3.60 | 3.97 | 3.79 | 0.0311 | AT5G24790 |
| 0.00 | 3.59 | 3.98 | 3.78 | 0.0328 | AT3G58070 |
| 0.00 | 3.72 | 3.84 | 3.78 | 0.0101 | AT2G42460 |
| 0.00 | 3.57 | 4.00 | 3.78 | 0.0361 | AT5G02550 |
| 0.00 | 3.78 | 3.78 | 3.78 | 0.0000 | AT2G29980 |
| 0.00 | 3.62 | 3.94 | 3.78 | 0.0269 | AT4G34220 |
| 0.00 | 3.75 | 3.81 | 3.78 | 0.0051 | AT2G02100 |
| 0.00 | 3.93 | 3.63 | 3.78 | 0.0252 | AT4G10895 |
| 0.00 | 3.72 | 3.83 | 3.78 | 0.0093 | AT2G19910 |
| 0.00 | 3.65 | 3.90 | 3.77 | 0.0211 | AT4G24260 |
| 0.00 | 3.48 | 4.06 | 3.77 | 0.0489 | AT2G27535 |
| 0.00 | 3.73 | 3.81 | 3.77 | 0.0068 | AT5G59970 |
| 0.00 | 3.77 | 3.77 | 3.77 | 0.0000 | AT1G52190 |
| 0.00 | 3.73 | 3.81 | 3.77 | 0.0068 | AT3G28007 |
| 0.00 | 3.47 | 4.06 | 3.77 | 0.0498 | AT1G26770 |
| 0.00 | 3.88 | 3.65 | 3.77 | 0.0194 | AT4G37840 |
| 0.00 | 3.95 | 3.58 | 3.76 | 0.0313 | AT1G23520 |
| 0.00 | 3.66 | 3.86 | 3.76 | 0.0169 | AT5G64330 |
| 0.00 | 3.55 | 3.97 | 3.76 | 0.0355 | AT4G21270 |
| 0.00 | 3.62 | 3.90 | 3.76 | 0.0237 | AT1G53140 |
| 0.00 | 3.79 | 3.73 | 3.76 | 0.0051 | AT4G23750 |
| 0.00 | 3.67 | 3.84 | 3.76 | 0.0144 | AT2G36026 |
| 0.00 | 4.00 | 3.51 | 3.76 | 0.0415 | AT1G66290 |
| 0.00 | 3.75 | 3.76 | 3.75 | 0.0008 | AT3G55120 |
| 0.00 | 3.83 | 3.66 | 3.75 | 0.0144 | AT1G75710 |
| 0.00 | 3.55 | 3.95 | 3.75 | 0.0339 | AT1G66430 |
| 0.00 | 3.46 | 4.02 | 3.74 | 0.0476 | AT4G17160 |
| 0.00 | 3.73 | 3.75 | 3.74 | 0.0017 | AT1G72810 |
| 0.00 | 3.56 | 3.91 | 3.73 | 0.0298 | AT3G18050 |
| 0.00 | 3.81 | 3.66 | 3.73 | 0.0128 | AT4G33260 |
| 0.00 | 3.88 | 3.58 | 3.73 | 0.0256 | AT2G38170 |
| 0.00 | 3.51 | 3.95 | 3.73 | 0.0375 | AT5G24580 |
| 0.00 | 3.76 | 3.70 | 3.73 | 0.0051 | AT4G12880 |
| 0.00 | 3.65 | 3.80 | 3.73 | 0.0128 | AT1G80280 |
| 0.00 | 3.48 | 3.97 | 3.73 | 0.0418 | AT3G05190 |
| 0.00 | 3.76 | 3.68 | 3.72 | 0.0068 | AT3G43720 |
| 0.00 | 3.82 | 3.62 | 3.72 | 0.0171 | AT5G67270 |
| 0.00 | 3.80 | 3.64 | 3.72 | 0.0137 | AT1G27461 |

|      |      |      |      |        |           |
|------|------|------|------|--------|-----------|
| 0.00 | 3.58 | 3.84 | 3.71 | 0.0223 | AT5G03960 |
| 0.00 | 3.79 | 3.62 | 3.71 | 0.0146 | AT3G23890 |
| 0.00 | 3.96 | 3.45 | 3.70 | 0.0437 | AT5G59320 |
| 0.00 | 3.74 | 3.67 | 3.70 | 0.0060 | AT3G58780 |
| 0.00 | 3.75 | 3.64 | 3.70 | 0.0095 | AT1G31760 |
| 0.00 | 3.73 | 3.66 | 3.69 | 0.0060 | AT1G01250 |
| 0.00 | 3.71 | 3.67 | 3.69 | 0.0035 | AT1G17140 |
| 0.00 | 3.51 | 3.87 | 3.69 | 0.0310 | AT4G15820 |
| 0.00 | 3.74 | 3.63 | 3.69 | 0.0095 | AT1G48480 |
| 0.00 | 3.70 | 3.68 | 3.69 | 0.0017 | AT2G21650 |
| 0.00 | 3.59 | 3.78 | 3.68 | 0.0164 | AT1G19460 |
| 0.00 | 3.51 | 3.85 | 3.68 | 0.0294 | AT4G11310 |
| 0.00 | 3.94 | 3.41 | 3.68 | 0.0458 | AT3G15270 |
| 0.00 | 3.45 | 3.90 | 3.68 | 0.0389 | AT1G15757 |
| 0.00 | 3.65 | 3.70 | 3.67 | 0.0043 | AT3G10520 |
| 0.00 | 3.55 | 3.79 | 3.67 | 0.0208 | AT3G02210 |
| 0.00 | 3.71 | 3.61 | 3.66 | 0.0087 | AT4G39000 |
| 0.00 | 3.53 | 3.79 | 3.66 | 0.0226 | AT4G35620 |
| 0.00 | 3.70 | 3.62 | 3.66 | 0.0070 | AT1G71695 |
| 0.00 | 3.73 | 3.59 | 3.66 | 0.0122 | AT1G12080 |
| 0.00 | 3.72 | 3.60 | 3.66 | 0.0104 | AT2G07170 |
| 0.00 | 3.89 | 3.42 | 3.66 | 0.0409 | AT4G38660 |
| 0.00 | 3.72 | 3.59 | 3.66 | 0.0113 | AT4G39590 |
| 0.00 | 3.57 | 3.74 | 3.66 | 0.0148 | AT1G01610 |
| 0.00 | 3.53 | 3.78 | 3.65 | 0.0218 | AT5G63225 |
| 0.00 | 3.67 | 3.64 | 3.65 | 0.0026 | AT3G59220 |
| 0.00 | 3.65 | 3.65 | 3.65 | 0.0000 | AT1G45010 |
| 0.00 | 3.58 | 3.73 | 3.65 | 0.0131 | AT2G46680 |
| 0.00 | 3.58 | 3.72 | 3.65 | 0.0122 | AT1G61070 |
| 0.00 | 3.78 | 3.52 | 3.65 | 0.0227 | AT2G15440 |
| 0.00 | 3.54 | 3.76 | 3.65 | 0.0192 | AT5G04160 |
| 0.00 | 3.36 | 3.93 | 3.64 | 0.0497 | AT5G42232 |
| 0.00 | 3.50 | 3.79 | 3.64 | 0.0253 | AT3G03341 |
| 0.00 | 3.51 | 3.77 | 3.64 | 0.0227 | AT5G10100 |
| 0.00 | 3.91 | 3.36 | 3.64 | 0.0481 | AT3G54410 |
| 0.00 | 3.62 | 3.63 | 3.63 | 0.0009 | AT2G28950 |
| 0.00 | 3.83 | 3.43 | 3.63 | 0.0350 | AT4G19905 |
| 0.00 | 3.50 | 3.75 | 3.62 | 0.0219 | AT3G57510 |
| 0.00 | 3.41 | 3.84 | 3.62 | 0.0377 | AT2G44450 |
| 0.00 | 3.58 | 3.67 | 3.62 | 0.0079 | AT1G07473 |
| 0.00 | 3.44 | 3.81 | 3.62 | 0.0325 | AT4G34790 |
| 0.00 | 3.40 | 3.85 | 3.62 | 0.0395 | AT5G58830 |
| 0.00 | 3.64 | 3.60 | 3.62 | 0.0035 | AT3G24340 |
| 0.00 | 3.64 | 3.60 | 3.62 | 0.0035 | AT4G02810 |
| 0.00 | 3.38 | 3.85 | 3.62 | 0.0413 | AT3G26742 |
| 0.00 | 3.77 | 3.47 | 3.62 | 0.0264 | AT1G04670 |
| 0.00 | 3.80 | 3.43 | 3.62 | 0.0326 | AT1G76310 |
| 0.00 | 3.68 | 3.55 | 3.61 | 0.0114 | AT4G05475 |
| 0.00 | 3.39 | 3.82 | 3.60 | 0.0379 | AT4G26770 |
| 0.00 | 3.64 | 3.57 | 3.60 | 0.0062 | AT4G14310 |
| 0.00 | 3.54 | 3.66 | 3.60 | 0.0106 | AT3G22820 |
| 0.00 | 3.60 | 3.58 | 3.59 | 0.0018 | AT4G23490 |
| 0.00 | 3.75 | 3.42 | 3.59 | 0.0293 | AT1G65180 |
| 0.00 | 3.46 | 3.70 | 3.58 | 0.0213 | AT4G00220 |
| 0.00 | 3.59 | 3.58 | 3.58 | 0.0009 | AT4G12690 |
| 0.00 | 3.71 | 3.46 | 3.58 | 0.0222 | AT2G45570 |
| 0.00 | 3.64 | 3.53 | 3.58 | 0.0098 | AT3G05480 |
| 0.00 | 3.67 | 3.50 | 3.58 | 0.0151 | AT4G36700 |
| 0.00 | 3.67 | 3.50 | 3.58 | 0.0151 | AT2G26250 |



|      |      |      |      |        |           |
|------|------|------|------|--------|-----------|
| 0.00 | 3.79 | 3.37 | 3.58 | 0.0373 | AT2G46720 |
| 0.00 | 3.55 | 3.59 | 3.57 | 0.0036 | AT4G36380 |
| 0.00 | 3.78 | 3.36 | 3.57 | 0.0374 | AT4G26660 |
| 0.00 | 3.34 | 3.79 | 3.57 | 0.0401 | AT4G16980 |
| 0.00 | 3.68 | 3.45 | 3.57 | 0.0205 | AT1G01370 |
| 0.00 | 3.58 | 3.54 | 3.56 | 0.0036 | AT2G16750 |
| 0.00 | 3.54 | 3.57 | 3.56 | 0.0027 | AT1G26540 |
| 0.00 | 3.42 | 3.69 | 3.56 | 0.0242 | AT1G14430 |
| 0.00 | 3.43 | 3.67 | 3.55 | 0.0215 | AT5G14410 |
| 0.00 | 3.39 | 3.71 | 3.55 | 0.0287 | AT5G43990 |
| 0.00 | 3.55 | 3.55 | 3.55 | 0.0000 | AT5G47530 |
| 0.00 | 3.61 | 3.49 | 3.55 | 0.0108 | AT3G49670 |
| 0.00 | 3.41 | 3.67 | 3.54 | 0.0234 | AT3G51230 |
| 0.00 | 3.47 | 3.61 | 3.54 | 0.0126 | AT5G03260 |
| 0.00 | 3.61 | 3.47 | 3.54 | 0.0126 | AT4G16515 |
| 0.00 | 3.68 | 3.38 | 3.53 | 0.0270 | AT1G74420 |
| 0.00 | 3.55 | 3.50 | 3.53 | 0.0045 | AT2G34190 |
| 0.00 | 3.25 | 3.80 | 3.52 | 0.0496 | AT1G54820 |
| 0.00 | 3.66 | 3.38 | 3.52 | 0.0253 | AT5G39130 |
| 0.00 | 3.29 | 3.75 | 3.52 | 0.0415 | AT5G66005 |
| 0.00 | 3.66 | 3.36 | 3.51 | 0.0272 | AT5G39520 |
| 0.00 | 3.60 | 3.42 | 3.51 | 0.0163 | AT1G20590 |
| 0.00 | 3.43 | 3.59 | 3.51 | 0.0145 | AT5G10400 |
| 0.00 | 3.51 | 3.49 | 3.50 | 0.0018 | AT1G08465 |
| 0.00 | 3.57 | 3.43 | 3.50 | 0.0127 | AT2G28470 |
| 0.00 | 3.65 | 3.35 | 3.50 | 0.0273 | AT4G33280 |
| 0.00 | 3.37 | 3.63 | 3.50 | 0.0236 | AT1G58360 |
| 0.00 | 3.50 | 3.49 | 3.50 | 0.0009 | AT4G28680 |
| 0.00 | 3.23 | 3.77 | 3.50 | 0.0490 | AT2G16210 |
| 0.00 | 3.70 | 3.30 | 3.50 | 0.0363 | AT5G60220 |
| 0.00 | 3.44 | 3.55 | 3.50 | 0.0100 | AT5G26120 |
| 0.00 | 3.23 | 3.76 | 3.49 | 0.0482 | AT5G55480 |
| 0.00 | 3.57 | 3.42 | 3.49 | 0.0137 | AT5G11550 |
| 0.00 | 3.46 | 3.53 | 3.49 | 0.0064 | AT3G07010 |
| 0.00 | 3.35 | 3.64 | 3.49 | 0.0264 | AT1G27770 |
| 0.00 | 3.42 | 3.56 | 3.49 | 0.0128 | AT5G65010 |
| 0.00 | 3.67 | 3.31 | 3.49 | 0.0328 | AT3G53380 |
| 0.00 | 3.64 | 3.33 | 3.48 | 0.0283 | AT4G05190 |
| 0.00 | 3.52 | 3.44 | 3.48 | 0.0073 | AT1G02205 |
| 0.00 | 3.47 | 3.49 | 3.48 | 0.0018 | AT4G34250 |
| 0.00 | 3.60 | 3.36 | 3.48 | 0.0219 | AT3G18850 |
| 0.00 | 3.34 | 3.61 | 3.47 | 0.0247 | AT1G31290 |
| 0.00 | 3.42 | 3.53 | 3.47 | 0.0101 | AT3G29030 |
| 0.00 | 3.24 | 3.70 | 3.47 | 0.0421 | AT1G19830 |
| 0.00 | 3.40 | 3.54 | 3.47 | 0.0128 | AT2G35950 |
| 0.00 | 3.66 | 3.27 | 3.47 | 0.0358 | AT3G62070 |
| 0.00 | 3.50 | 3.44 | 3.47 | 0.0055 | AT1G24130 |
| 0.00 | 3.22 | 3.71 | 3.47 | 0.0449 | AT2G23200 |
| 0.00 | 3.37 | 3.55 | 3.46 | 0.0166 | AT3G50890 |
| 0.00 | 3.55 | 3.36 | 3.46 | 0.0175 | AT5G24420 |
| 0.00 | 3.51 | 3.40 | 3.45 | 0.0101 | AT5G56510 |
| 0.00 | 3.47 | 3.44 | 3.45 | 0.0028 | AT4G28720 |
| 0.00 | 3.31 | 3.60 | 3.45 | 0.0267 | AT3G04290 |
| 0.00 | 3.58 | 3.33 | 3.45 | 0.0230 | AT2G45970 |
| 0.00 | 3.58 | 3.32 | 3.45 | 0.0240 | AT5G09210 |
| 0.00 | 3.41 | 3.49 | 3.45 | 0.0074 | AT5G05810 |
| 0.00 | 3.26 | 3.64 | 3.45 | 0.0350 | AT1G29500 |
| 0.00 | 3.48 | 3.41 | 3.45 | 0.0065 | AT5G20790 |
| 0.00 | 3.55 | 3.34 | 3.44 | 0.0194 | AT4G35190 |

|      |      |      |      |        |           |
|------|------|------|------|--------|-----------|
| 0.00 | 3.51 | 3.37 | 3.44 | 0.0130 | AT1G22250 |
| 0.00 | 3.27 | 3.60 | 3.43 | 0.0306 | AT1G19640 |
| 0.00 | 3.38 | 3.49 | 3.43 | 0.0102 | AT4G28556 |
| 0.00 | 3.30 | 3.56 | 3.43 | 0.0241 | AT3G10190 |
| 0.00 | 3.34 | 3.52 | 3.43 | 0.0167 | AT3G19270 |
| 0.00 | 3.67 | 3.18 | 3.43 | 0.0455 | AT1G75920 |
| 0.00 | 3.53 | 3.32 | 3.43 | 0.0195 | AT2G39060 |
| 0.00 | 3.33 | 3.52 | 3.43 | 0.0177 | AT4G15680 |
| 0.00 | 3.28 | 3.56 | 3.42 | 0.0260 | AT4G16140 |
| 0.00 | 3.42 | 3.41 | 3.41 | 0.0009 | AT3G28220 |
| 0.00 | 3.32 | 3.50 | 3.41 | 0.0168 | AT3G45930 |
| 0.00 | 3.18 | 3.63 | 3.40 | 0.0420 | AT2G23050 |
| 0.00 | 3.37 | 3.43 | 3.40 | 0.0056 | AT3G27360 |
| 0.00 | 3.51 | 3.29 | 3.40 | 0.0206 | AT5G27330 |
| 0.00 | 3.52 | 3.27 | 3.39 | 0.0234 | AT3G01328 |
| 0.00 | 3.28 | 3.50 | 3.39 | 0.0207 | AT3G18485 |
| 0.00 | 3.05 | 3.72 | 3.38 | 0.0467 | AT3G56350 |
| 0.00 | 3.48 | 3.29 | 3.38 | 0.0179 | AT2G27040 |
| 0.00 | 3.36 | 3.40 | 3.38 | 0.0038 | AT5G40310 |
| 0.00 | 3.39 | 3.37 | 3.38 | 0.0019 | AT1G67035 |
| 0.00 | 3.26 | 3.49 | 3.38 | 0.0217 | AT1G31140 |
| 0.00 | 3.19 | 3.56 | 3.38 | 0.0349 | AT1G80540 |
| 0.00 | 3.32 | 3.42 | 3.37 | 0.0094 | AT3G59420 |
| 0.00 | 3.47 | 3.27 | 3.37 | 0.0189 | AT5G43590 |
| 0.00 | 3.29 | 3.44 | 3.37 | 0.0142 | AT2G18328 |
| 0.00 | 3.26 | 3.46 | 3.36 | 0.0189 | AT2G34490 |
| 0.00 | 3.48 | 3.23 | 3.35 | 0.0237 | AT4G23380 |
| 0.00 | 3.18 | 3.52 | 3.35 | 0.0323 | AT5G27220 |
| 0.00 | 3.23 | 3.47 | 3.35 | 0.0228 | AT1G60060 |
| 0.00 | 3.41 | 3.29 | 3.35 | 0.0114 | AT3G52820 |
| 0.00 | 3.37 | 3.33 | 3.35 | 0.0038 | AT2G35760 |
| 0.00 | 3.38 | 3.32 | 3.35 | 0.0057 | AT5G14610 |
| 0.00 | 3.46 | 3.23 | 3.35 | 0.0219 | AT2G24610 |
| 0.00 | 3.46 | 3.22 | 3.34 | 0.0229 | AT4G11400 |
| 0.00 | 3.22 | 3.46 | 3.34 | 0.0229 | AT4G28250 |
| 0.00 | 3.40 | 3.28 | 3.34 | 0.0114 | AT5G61570 |
| 0.00 | 3.29 | 3.39 | 3.34 | 0.0095 | AT5G37790 |
| 0.00 | 3.16 | 3.52 | 3.34 | 0.0343 | AT5G47610 |
| 0.00 | 3.61 | 3.07 | 3.34 | 0.0312 | AT1G77210 |
| 0.00 | 3.30 | 3.37 | 3.34 | 0.0067 | AT4G23820 |
| 0.00 | 3.28 | 3.39 | 3.33 | 0.0105 | AT1G75750 |
| 0.00 | 3.13 | 3.53 | 3.33 | 0.0382 | AT3G16240 |
| 0.00 | 3.43 | 3.23 | 3.33 | 0.0191 | AT1G10680 |
| 0.00 | 3.21 | 3.45 | 3.33 | 0.0229 | AT5G28000 |
| 0.00 | 3.23 | 3.42 | 3.33 | 0.0182 | AT4G17215 |
| 0.00 | 3.33 | 3.32 | 3.32 | 0.0010 | AT5G65360 |
| 0.00 | 3.36 | 3.28 | 3.32 | 0.0077 | AT2G46290 |
| 0.00 | 3.38 | 3.25 | 3.31 | 0.0125 | AT2G38180 |
| 0.00 | 3.53 | 3.09 | 3.31 | 0.0423 | AT4G10190 |
| 0.00 | 3.27 | 3.35 | 3.31 | 0.0077 | AT2G04160 |
| 0.00 | 3.21 | 3.40 | 3.31 | 0.0183 | AT4G33160 |
| 0.00 | 3.32 | 3.29 | 3.31 | 0.0029 | AT1G01900 |
| 0.00 | 3.18 | 3.43 | 3.31 | 0.0241 | AT1G10780 |
| 0.00 | 3.07 | 3.54 | 3.31 | 0.0452 | AT1G07370 |
| 0.00 | 3.42 | 3.19 | 3.30 | 0.0221 | AT3G29050 |
| 0.00 | 3.40 | 3.21 | 3.30 | 0.0183 | AT2G30424 |
| 0.00 | 3.22 | 3.39 | 3.30 | 0.0164 | AT1G06660 |
| 0.00 | 3.55 | 3.06 | 3.30 | 0.0471 | AT3G53075 |
| 0.00 | 3.29 | 3.31 | 3.30 | 0.0019 | AT5G52330 |

|      |      |      |      |        |           |
|------|------|------|------|--------|-----------|
| 0.00 | 3.19 | 3.41 | 3.30 | 0.0212 | AT4G28650 |
| 0.00 | 3.28 | 3.31 | 3.30 | 0.0029 | AT2G47010 |
| 0.00 | 3.30 | 3.30 | 3.30 | 0.0000 | AT2G43360 |
| 0.00 | 3.13 | 3.46 | 3.29 | 0.0319 | AT1G70985 |
| 0.00 | 3.09 | 3.49 | 3.29 | 0.0387 | AT5G12050 |
| 0.00 | 3.51 | 3.07 | 3.29 | 0.0425 | AT5G67360 |
| 0.00 | 3.18 | 3.40 | 3.29 | 0.0213 | AT1G16750 |
| 0.00 | 3.31 | 3.27 | 3.29 | 0.0039 | AT1G22370 |
| 0.00 | 3.20 | 3.37 | 3.29 | 0.0165 | AT5G39493 |
| 0.00 | 3.11 | 3.46 | 3.29 | 0.0339 | AT5G67070 |
| 0.00 | 3.51 | 3.05 | 3.28 | 0.0446 | AT3G48160 |
| 0.00 | 3.28 | 3.28 | 3.28 | 0.0000 | AT1G02460 |
| 0.00 | 3.11 | 3.45 | 3.28 | 0.0330 | AT1G29460 |
| 0.00 | 3.41 | 3.14 | 3.28 | 0.0262 | AT1G22110 |
| 0.00 | 3.17 | 3.38 | 3.28 | 0.0204 | AT1G26100 |
| 0.00 | 3.17 | 3.38 | 3.28 | 0.0204 | AT4G01410 |
| 0.00 | 3.48 | 3.06 | 3.27 | 0.0408 | AT4G29700 |
| 0.00 | 3.13 | 3.41 | 3.27 | 0.0272 | AT3G50660 |
| 0.00 | 3.26 | 3.27 | 3.26 | 0.0010 | AT4G24510 |
| 0.00 | 3.32 | 3.20 | 3.26 | 0.0117 | AT5G48950 |
| 0.00 | 3.19 | 3.32 | 3.26 | 0.0127 | AT2G04780 |
| 0.00 | 3.03 | 3.48 | 3.26 | 0.0439 | AT4G13710 |
| 0.00 | 3.16 | 3.34 | 3.25 | 0.0176 | AT3G15550 |
| 0.00 | 3.23 | 3.27 | 3.25 | 0.0039 | AT3G45230 |
| 0.00 | 3.04 | 3.44 | 3.24 | 0.0392 | AT2G33330 |
| 0.00 | 3.43 | 3.04 | 3.24 | 0.0383 | AT5G37010 |
| 0.00 | 3.47 | 3.00 | 3.24 | 0.0462 | AT4G31760 |
| 0.00 | 3.17 | 3.30 | 3.23 | 0.0128 | AT1G06830 |
| 0.00 | 3.08 | 3.38 | 3.23 | 0.0295 | AT2G02130 |
| 0.00 | 3.20 | 3.26 | 3.23 | 0.0059 | AT4G08630 |
| 0.00 | 3.07 | 3.39 | 3.23 | 0.0315 | AT1G33170 |
| 0.00 | 3.29 | 3.17 | 3.23 | 0.0118 | AT2G24615 |
| 0.00 | 3.41 | 3.04 | 3.22 | 0.0365 | AT5G42280 |
| 0.00 | 3.02 | 3.42 | 3.22 | 0.0395 | AT4G09984 |
| 0.00 | 3.23 | 3.22 | 3.22 | 0.0010 | AT3G24220 |
| 0.00 | 3.33 | 3.11 | 3.22 | 0.0217 | AT1G17770 |
| 0.00 | 3.35 | 3.08 | 3.22 | 0.0267 | AT1G15260 |
| 0.00 | 3.20 | 3.24 | 3.22 | 0.0040 | AT3G54560 |
| 0.00 | 3.06 | 3.37 | 3.21 | 0.0307 | AT3G49220 |
| 0.00 | 3.17 | 3.26 | 3.21 | 0.0089 | AT2G47780 |
| 0.00 | 3.31 | 3.11 | 3.21 | 0.0198 | AT2G17630 |
| 0.00 | 3.07 | 3.35 | 3.21 | 0.0277 | AT3G51470 |
| 0.00 | 3.12 | 3.28 | 3.20 | 0.0159 | AT4G18760 |
| 0.00 | 3.06 | 3.34 | 3.20 | 0.0278 | AT2G42900 |
| 0.00 | 3.03 | 3.37 | 3.20 | 0.0338 | AT4G25490 |
| 0.00 | 3.36 | 3.04 | 3.20 | 0.0318 | AT2G41540 |
| 0.00 | 3.44 | 2.94 | 3.19 | 0.0498 | AT3G30180 |
| 0.00 | 3.19 | 3.19 | 3.19 | 0.0000 | AT1G77270 |
| 0.00 | 2.99 | 3.38 | 3.19 | 0.0389 | AT5G50375 |
| 0.00 | 3.24 | 3.12 | 3.18 | 0.0120 | AT4G33130 |
| 0.00 | 3.32 | 3.05 | 3.18 | 0.0270 | AT1G21880 |
| 0.00 | 2.98 | 3.38 | 3.18 | 0.0400 | AT4G39700 |
| 0.00 | 3.14 | 3.23 | 3.18 | 0.0090 | AT4G26760 |
| 0.00 | 3.21 | 3.14 | 3.18 | 0.0070 | AT4G24040 |
| 0.00 | 3.39 | 2.96 | 3.17 | 0.0430 | AT4G31370 |
| 0.00 | 3.26 | 3.07 | 3.16 | 0.0191 | AT2G44190 |
| 0.00 | 2.98 | 3.35 | 3.16 | 0.0372 | AT3G12170 |
| 0.00 | 2.99 | 3.34 | 3.16 | 0.0352 | AT3G14530 |
| 0.00 | 3.04 | 3.29 | 3.16 | 0.0251 | AT5G66800 |

|      |      |      |      |        |           |
|------|------|------|------|--------|-----------|
| 0.00 | 3.32 | 3.00 | 3.16 | 0.0322 | AT4G00160 |
| 0.00 | 3.07 | 3.24 | 3.16 | 0.0171 | AT1G52400 |
| 0.00 | 3.10 | 3.21 | 3.16 | 0.0111 | AT2G16850 |
| 0.00 | 3.15 | 3.16 | 3.15 | 0.0010 | AT1G14490 |
| 0.00 | 2.95 | 3.36 | 3.15 | 0.0413 | AT5G03795 |
| 0.00 | 3.36 | 2.94 | 3.15 | 0.0424 | AT1G77580 |
| 0.00 | 3.23 | 3.08 | 3.15 | 0.0151 | AT1G13590 |
| 0.00 | 3.09 | 3.19 | 3.14 | 0.0101 | AT1G62370 |
| 0.00 | 2.98 | 3.31 | 3.14 | 0.0334 | AT3G53080 |
| 0.00 | 3.18 | 3.10 | 3.14 | 0.0081 | AT5G56580 |
| 0.00 | 3.14 | 3.13 | 3.14 | 0.0010 | AT1G09540 |
| 0.00 | 3.32 | 2.95 | 3.14 | 0.0375 | AT2G15090 |
| 0.00 | 3.14 | 3.13 | 3.13 | 0.0010 | AT4G36180 |
| 0.00 | 3.09 | 3.17 | 3.13 | 0.0081 | AT2G36080 |
| 0.00 | 3.35 | 2.91 | 3.13 | 0.0447 | AT5G55370 |
| 0.00 | 2.92 | 3.34 | 3.13 | 0.0426 | AT1G71770 |
| 0.00 | 2.95 | 3.30 | 3.12 | 0.0356 | AT3G60220 |
| 0.00 | 3.22 | 3.02 | 3.12 | 0.0204 | AT4G10950 |
| 0.00 | 2.92 | 3.32 | 3.12 | 0.0408 | AT1G54040 |
| 0.00 | 3.17 | 3.06 | 3.12 | 0.0112 | AT2G45490 |
| 0.00 | 3.16 | 3.07 | 3.11 | 0.0092 | AT1G74160 |
| 0.00 | 3.04 | 3.18 | 3.11 | 0.0143 | AT3G21460 |
| 0.00 | 2.95 | 3.26 | 3.11 | 0.0318 | AT4G26320 |
| 0.00 | 2.89 | 3.32 | 3.10 | 0.0440 | AT1G76830 |
| 0.00 | 3.22 | 2.99 | 3.10 | 0.0236 | AT1G02040 |
| 0.00 | 3.08 | 3.13 | 3.10 | 0.0051 | AT1G68120 |
| 0.00 | 2.87 | 3.33 | 3.10 | 0.0471 | AT1G71320 |
| 0.00 | 2.90 | 3.29 | 3.10 | 0.0401 | AT2G06850 |
| 0.00 | 3.00 | 3.19 | 3.09 | 0.0195 | AT1G72250 |
| 0.00 | 3.25 | 2.93 | 3.09 | 0.0329 | AT5G03840 |
| 0.00 | 3.20 | 2.98 | 3.09 | 0.0227 | AT4G23800 |
| 0.00 | 3.23 | 2.95 | 3.09 | 0.0288 | AT1G03170 |
| 0.00 | 3.06 | 3.11 | 3.09 | 0.0052 | AT2G34170 |
| 0.00 | 3.22 | 2.95 | 3.09 | 0.0278 | AT3G48410 |
| 0.00 | 3.03 | 3.14 | 3.08 | 0.0113 | AT1G25450 |
| 0.00 | 3.13 | 3.03 | 3.08 | 0.0103 | AT3G52970 |
| 0.00 | 3.15 | 3.00 | 3.08 | 0.0155 | AT1G05210 |
| 0.00 | 3.01 | 3.14 | 3.08 | 0.0135 | AT1G11220 |
| 0.00 | 3.28 | 2.87 | 3.08 | 0.0424 | AT3G10910 |
| 0.00 | 3.10 | 3.05 | 3.07 | 0.0052 | AT2G17300 |
| 0.00 | 2.97 | 3.17 | 3.07 | 0.0207 | AT2G25880 |
| 0.00 | 3.05 | 3.09 | 3.07 | 0.0041 | AT4G14713 |
| 0.00 | 3.07 | 3.07 | 3.07 | 0.0000 | AT2G34650 |
| 0.00 | 3.01 | 3.12 | 3.07 | 0.0114 | AT5G13790 |
| 0.00 | 2.87 | 3.26 | 3.07 | 0.0404 | AT1G04680 |
| 0.00 | 3.05 | 3.07 | 3.06 | 0.0021 | AT4G25960 |
| 0.00 | 2.99 | 3.14 | 3.06 | 0.0156 | AT3G12145 |
| 0.00 | 3.06 | 3.06 | 3.06 | 0.0000 | AT5G10390 |
| 0.00 | 3.14 | 2.98 | 3.06 | 0.0166 | AT5G49800 |
| 0.00 | 3.03 | 3.08 | 3.06 | 0.0052 | AT1G68570 |
| 0.00 | 3.03 | 3.08 | 3.05 | 0.0052 | AT1G09470 |
| 0.00 | 3.12 | 2.99 | 3.05 | 0.0135 | AT5G61730 |
| 0.00 | 3.13 | 2.96 | 3.04 | 0.0178 | AT5G01910 |
| 0.00 | 3.05 | 3.03 | 3.04 | 0.0021 | AT2G43820 |
| 0.00 | 3.21 | 2.86 | 3.04 | 0.0367 | AT4G01730 |
| 0.00 | 3.00 | 3.07 | 3.04 | 0.0073 | AT4G13990 |
| 0.00 | 3.16 | 2.92 | 3.04 | 0.0251 | AT3G18630 |
| 0.00 | 3.13 | 2.94 | 3.04 | 0.0199 | AT5G44110 |
| 0.00 | 2.89 | 3.18 | 3.03 | 0.0304 | AT2G18260 |

|      |      |      |      |        |           |
|------|------|------|------|--------|-----------|
| 0.00 | 3.14 | 2.92 | 3.03 | 0.0231 | AT5G25470 |
| 0.00 | 2.98 | 3.07 | 3.02 | 0.0095 | AT1G68250 |
| 0.00 | 3.18 | 2.86 | 3.02 | 0.0337 | AT3G57860 |
| 0.00 | 3.08 | 2.95 | 3.01 | 0.0137 | AT4G10860 |
| 0.00 | 3.00 | 3.01 | 3.01 | 0.0011 | AT5G35390 |
| 0.00 | 2.82 | 3.19 | 3.00 | 0.0391 | AT1G51190 |
| 0.00 | 3.20 | 2.79 | 3.00 | 0.0435 | AT1G63850 |
| 0.00 | 3.04 | 2.95 | 3.00 | 0.0096 | AT2G27145 |
| 0.00 | 2.84 | 3.16 | 3.00 | 0.0339 | AT5G20850 |
| 0.00 | 2.79 | 3.20 | 3.00 | 0.0435 | AT2G36400 |
| 0.00 | 3.07 | 2.91 | 2.99 | 0.0170 | AT1G70380 |
| 0.00 | 3.23 | 2.76 | 2.99 | 0.0498 | AT4G16620 |
| 0.00 | 2.76 | 3.23 | 2.99 | 0.0498 | AT5G10430 |
| 0.00 | 2.94 | 3.04 | 2.99 | 0.0106 | AT5G65410 |
| 0.00 | 2.85 | 3.12 | 2.99 | 0.0288 | AT5G14920 |
| 0.00 | 3.06 | 2.91 | 2.98 | 0.0160 | AT4G33467 |
| 0.00 | 2.88 | 3.08 | 2.98 | 0.0214 | AT1G65920 |
| 0.00 | 2.88 | 3.08 | 2.98 | 0.0214 | AT1G09350 |
| 0.00 | 2.80 | 3.16 | 2.98 | 0.0384 | AT4G11211 |
| 0.00 | 2.87 | 3.08 | 2.98 | 0.0225 | AT3G27330 |
| 0.00 | 2.83 | 3.13 | 2.98 | 0.0320 | AT5G07500 |
| 0.00 | 2.85 | 3.11 | 2.98 | 0.0278 | AT3G47295 |
| 0.00 | 3.20 | 2.76 | 2.98 | 0.0469 | AT2G31985 |
| 0.00 | 2.92 | 3.03 | 2.98 | 0.0118 | AT1G68170 |
| 0.00 | 3.13 | 2.82 | 2.97 | 0.0331 | AT5G15660 |
| 0.00 | 2.83 | 3.12 | 2.97 | 0.0349 | AT1G78090 |
| 0.00 | 2.98 | 2.97 | 2.97 | 0.0011 | AT2G22230 |
| 0.00 | 2.78 | 3.16 | 2.97 | 0.0407 | AT3G22020 |
| 0.00 | 2.97 | 2.97 | 2.97 | 0.0000 | AT3G14240 |
| 0.00 | 3.03 | 2.91 | 2.97 | 0.0129 | AT3G54250 |
| 0.00 | 2.83 | 3.11 | 2.97 | 0.0300 | AT3G49580 |
| 0.00 | 3.06 | 2.87 | 2.96 | 0.0204 | AT5G12910 |
| 0.00 | 3.08 | 2.85 | 2.96 | 0.0247 | AT3G03280 |
| 0.00 | 2.95 | 2.98 | 2.96 | 0.0032 | AT5G54190 |
| 0.00 | 3.14 | 2.79 | 2.96 | 0.0375 | AT1G74055 |
| 0.00 | 2.81 | 3.11 | 2.96 | 0.0322 | AT1G71830 |
| 0.00 | 2.85 | 3.05 | 2.95 | 0.0216 | AT3G52340 |
| 0.00 | 3.14 | 2.74 | 2.94 | 0.0432 | AT2G03090 |
| 0.00 | 2.81 | 3.07 | 2.94 | 0.0281 | AT5G62700 |
| 0.00 | 2.81 | 3.06 | 2.94 | 0.0271 | AT1G09450 |
| 0.00 | 2.72 | 3.15 | 2.94 | 0.0466 | AT1G10380 |
| 0.00 | 2.74 | 3.12 | 2.93 | 0.0412 | AT3G19850 |
| 0.00 | 2.89 | 2.97 | 2.93 | 0.0087 | AT1G23080 |
| 0.00 | 2.83 | 3.02 | 2.93 | 0.0207 | AT3G57160 |
| 0.00 | 2.79 | 3.05 | 2.92 | 0.0283 | AT1G04250 |
| 0.00 | 2.76 | 3.08 | 2.92 | 0.0348 | AT5G49215 |
| 0.00 | 2.93 | 2.90 | 2.91 | 0.0033 | AT1G62640 |
| 0.00 | 3.02 | 2.80 | 2.91 | 0.0241 | AT2G05990 |
| 0.00 | 2.81 | 3.02 | 2.91 | 0.0229 | AT3G23670 |
| 0.00 | 2.99 | 2.83 | 2.91 | 0.0175 | AT3G60840 |
| 0.00 | 2.80 | 3.02 | 2.91 | 0.0241 | AT3G01410 |
| 0.00 | 3.06 | 2.74 | 2.90 | 0.0351 | AT2G35640 |
| 0.00 | 2.92 | 2.88 | 2.90 | 0.0044 | AT3G03826 |
| 0.00 | 2.94 | 2.85 | 2.90 | 0.0099 | AT1G16850 |
| 0.00 | 2.92 | 2.87 | 2.90 | 0.0055 | AT3G05020 |
| 0.00 | 2.91 | 2.88 | 2.89 | 0.0033 | AT4G02060 |
| 0.00 | 2.75 | 3.03 | 2.89 | 0.0308 | AT1G21090 |
| 0.00 | 2.88 | 2.89 | 2.89 | 0.0011 | AT4G12730 |
| 0.00 | 2.88 | 2.89 | 2.89 | 0.0011 | AT1G64640 |

|      |      |      |      |        |           |
|------|------|------|------|--------|-----------|
| 0.00 | 2.75 | 3.02 | 2.89 | 0.0298 | AT4G15700 |
| 0.00 | 2.73 | 3.04 | 2.89 | 0.0342 | AT2G43261 |
| 0.00 | 2.96 | 2.81 | 2.88 | 0.0165 | AT3G13520 |
| 0.00 | 2.83 | 2.93 | 2.88 | 0.0111 | AT4G15970 |
| 0.00 | 2.83 | 2.93 | 2.88 | 0.0111 | AT4G25850 |
| 0.00 | 2.80 | 2.95 | 2.88 | 0.0166 | AT3G51680 |
| 0.00 | 2.89 | 2.86 | 2.88 | 0.0033 | AT1G57750 |
| 0.00 | 2.79 | 2.95 | 2.87 | 0.0177 | AT3G57500 |
| 0.00 | 3.08 | 2.67 | 2.87 | 0.0453 | AT1G17060 |
| 0.00 | 2.82 | 2.93 | 2.87 | 0.0122 | AT3G27060 |
| 0.00 | 2.66 | 3.08 | 2.87 | 0.0465 | AT2G24630 |
| 0.00 | 3.09 | 2.65 | 2.87 | 0.0487 | AT1G72130 |
| 0.00 | 3.08 | 2.65 | 2.87 | 0.0477 | AT3G30842 |
| 0.00 | 2.74 | 3.00 | 2.87 | 0.0288 | AT1G21460 |
| 0.00 | 2.93 | 2.80 | 2.87 | 0.0144 | AT2G29890 |
| 0.00 | 2.68 | 3.04 | 2.86 | 0.0400 | AT1G20650 |
| 0.00 | 2.76 | 2.96 | 2.86 | 0.0223 | AT3G10080 |
| 0.00 | 3.01 | 2.70 | 2.86 | 0.0345 | AT5G38080 |
| 0.00 | 2.82 | 2.89 | 2.86 | 0.0078 | AT4G21480 |
| 0.00 | 2.66 | 3.04 | 2.85 | 0.0424 | AT1G55740 |
| 0.00 | 2.98 | 2.72 | 2.85 | 0.0290 | AT4G21820 |
| 0.00 | 2.87 | 2.83 | 2.85 | 0.0045 | AT1G09750 |
| 0.00 | 3.01 | 2.67 | 2.84 | 0.0381 | AT2G38810 |
| 0.00 | 2.72 | 2.96 | 2.84 | 0.0269 | AT5G42180 |
| 0.00 | 2.66 | 3.02 | 2.84 | 0.0403 | AT3G58650 |
| 0.00 | 2.80 | 2.88 | 2.84 | 0.0090 | AT5G59510 |
| 0.00 | 2.86 | 2.82 | 2.84 | 0.0045 | AT5G22791 |
| 0.00 | 2.77 | 2.90 | 2.84 | 0.0146 | AT5G59020 |
| 0.00 | 2.76 | 2.89 | 2.83 | 0.0146 | AT2G24280 |
| 0.00 | 2.61 | 3.04 | 2.83 | 0.0484 | AT3G53900 |
| 0.00 | 2.68 | 2.97 | 2.83 | 0.0326 | AT1G76240 |
| 0.00 | 2.78 | 2.86 | 2.82 | 0.0090 | AT5G15950 |
| 0.00 | 2.78 | 2.85 | 2.81 | 0.0079 | AT1G12460 |
| 0.00 | 2.93 | 2.69 | 2.81 | 0.0272 | AT3G22880 |
| 0.00 | 3.03 | 2.60 | 2.81 | 0.0485 | AT1G43800 |
| 0.00 | 2.79 | 2.83 | 2.81 | 0.0045 | AT3G16150 |
| 0.00 | 2.60 | 3.01 | 2.81 | 0.0464 | AT5G10720 |
| 0.00 | 2.65 | 2.96 | 2.80 | 0.0351 | AT1G49470 |
| 0.00 | 2.83 | 2.78 | 2.80 | 0.0057 | AT4G17680 |
| 0.00 | 2.66 | 2.94 | 2.80 | 0.0318 | AT1G06260 |
| 0.00 | 2.87 | 2.72 | 2.79 | 0.0171 | AT1G03440 |
| 0.00 | 2.73 | 2.84 | 2.79 | 0.0126 | AT1G13608 |
| 0.00 | 2.94 | 2.63 | 2.79 | 0.0354 | AT1G48180 |
| 0.00 | 2.96 | 2.61 | 2.79 | 0.0400 | AT2G26330 |
| 0.00 | 2.63 | 2.94 | 2.79 | 0.0354 | AT1G02180 |
| 0.00 | 2.72 | 2.85 | 2.79 | 0.0149 | AT3G55360 |
| 0.00 | 2.87 | 2.69 | 2.78 | 0.0206 | AT1G70680 |
| 0.00 | 2.84 | 2.73 | 2.78 | 0.0126 | AT5G65710 |
| 0.00 | 2.76 | 2.79 | 2.78 | 0.0034 | AT4G33820 |
| 0.00 | 2.56 | 2.99 | 2.77 | 0.0492 | AT5G40155 |
| 0.00 | 2.82 | 2.71 | 2.77 | 0.0127 | AT2G35490 |
| 0.00 | 2.65 | 2.87 | 2.76 | 0.0254 | AT3G12700 |
| 0.00 | 2.73 | 2.80 | 2.76 | 0.0081 | AT1G13250 |
| 0.00 | 2.67 | 2.84 | 2.75 | 0.0196 | AT5G57260 |
| 0.00 | 2.84 | 2.67 | 2.75 | 0.0196 | AT1G23130 |
| 0.00 | 2.63 | 2.88 | 2.75 | 0.0289 | AT3G23060 |
| 0.00 | 2.83 | 2.67 | 2.75 | 0.0185 | AT1G45130 |
| 0.00 | 2.85 | 2.66 | 2.75 | 0.0219 | AT1G55360 |
| 0.00 | 2.78 | 2.71 | 2.75 | 0.0081 | AT5G60490 |



|      |      |      |      |        |           |
|------|------|------|------|--------|-----------|
| 0.00 | 2.77 | 2.72 | 2.74 | 0.0058 | AT2G34060 |
| 0.00 | 2.57 | 2.91 | 2.74 | 0.0394 | AT1G70990 |
| 0.00 | 2.87 | 2.61 | 2.74 | 0.0302 | AT3G01350 |
| 0.00 | 2.73 | 2.74 | 2.73 | 0.0012 | AT1G80640 |
| 0.00 | 2.64 | 2.83 | 2.73 | 0.0221 | AT3G24450 |
| 0.00 | 2.76 | 2.70 | 2.73 | 0.0070 | AT1G30600 |
| 0.00 | 2.61 | 2.85 | 2.73 | 0.0280 | AT3G28960 |
| 0.00 | 2.59 | 2.87 | 2.73 | 0.0326 | AT3G22770 |
| 0.00 | 2.64 | 2.81 | 2.73 | 0.0199 | AT5G63090 |
| 0.00 | 2.81 | 2.64 | 2.73 | 0.0199 | AT3G23727 |
| 0.00 | 2.82 | 2.63 | 2.73 | 0.0222 | AT1G12805 |
| 0.00 | 2.74 | 2.71 | 2.73 | 0.0035 | AT4G14690 |
| 0.00 | 2.67 | 2.78 | 2.72 | 0.0128 | AT1G75090 |
| 0.00 | 2.68 | 2.76 | 2.72 | 0.0094 | AT3G56260 |
| 0.00 | 2.64 | 2.79 | 2.72 | 0.0176 | AT4G28190 |
| 0.00 | 2.85 | 2.58 | 2.71 | 0.0316 | AT4G36600 |
| 0.00 | 2.52 | 2.90 | 2.71 | 0.0446 | AT1G09240 |
| 0.00 | 2.66 | 2.76 | 2.71 | 0.0117 | AT3G05890 |
| 0.00 | 2.55 | 2.87 | 2.71 | 0.0375 | AT2G38060 |
| 0.00 | 2.67 | 2.75 | 2.71 | 0.0094 | AT3G04960 |
| 0.00 | 2.80 | 2.61 | 2.71 | 0.0223 | AT2G16890 |
| 0.00 | 2.72 | 2.68 | 2.70 | 0.0047 | AT2G42570 |
| 0.00 | 2.66 | 2.73 | 2.70 | 0.0083 | AT1G10100 |
| 0.00 | 2.76 | 2.64 | 2.70 | 0.0141 | AT4G19430 |
| 0.00 | 2.79 | 2.61 | 2.70 | 0.0212 | AT2G28620 |
| 0.00 | 2.53 | 2.87 | 2.70 | 0.0400 | AT5G62960 |
| 0.00 | 2.85 | 2.54 | 2.70 | 0.0321 | AT4G15530 |
| 0.00 | 2.68 | 2.71 | 2.69 | 0.0035 | AT1G27670 |
| 0.00 | 2.57 | 2.82 | 2.69 | 0.0295 | AT1G29980 |
| 0.00 | 2.58 | 2.81 | 2.69 | 0.0271 | AT1G19440 |
| 0.00 | 2.80 | 2.58 | 2.69 | 0.0260 | AT1G05370 |
| 0.00 | 2.74 | 2.65 | 2.69 | 0.0106 | AT1G15760 |
| 0.00 | 2.67 | 2.71 | 2.69 | 0.0047 | AT5G14130 |
| 0.00 | 2.55 | 2.82 | 2.69 | 0.0320 | AT3G48460 |
| 0.00 | 2.56 | 2.81 | 2.69 | 0.0296 | AT4G16460 |
| 0.00 | 2.69 | 2.68 | 2.69 | 0.0012 | AT4G26960 |
| 0.00 | 2.53 | 2.84 | 2.68 | 0.0367 | AT4G03210 |
| 0.00 | 2.59 | 2.77 | 2.68 | 0.0214 | AT3G05400 |
| 0.00 | 2.80 | 2.56 | 2.68 | 0.0285 | AT1G22170 |
| 0.00 | 2.62 | 2.74 | 2.68 | 0.0143 | AT5G65420 |
| 0.00 | 2.74 | 2.61 | 2.68 | 0.0155 | AT2G27770 |
| 0.00 | 2.69 | 2.66 | 2.68 | 0.0036 | AT5G40150 |
| 0.00 | 2.80 | 2.56 | 2.68 | 0.0285 | AT1G72600 |
| 0.00 | 2.60 | 2.75 | 2.67 | 0.0178 | AT5G22740 |
| 0.00 | 2.53 | 2.82 | 2.67 | 0.0345 | AT4G13700 |
| 0.00 | 2.66 | 2.69 | 2.67 | 0.0036 | AT2G22900 |
| 0.00 | 2.74 | 2.59 | 2.67 | 0.0179 | AT4G27980 |
| 0.00 | 2.54 | 2.79 | 2.67 | 0.0298 | AT1G35310 |
| 0.00 | 2.63 | 2.70 | 2.67 | 0.0084 | AT2G27060 |
| 0.00 | 2.55 | 2.79 | 2.67 | 0.0286 | AT1G78390 |
| 0.00 | 2.55 | 2.78 | 2.66 | 0.0275 | AT4G13230 |
| 0.00 | 2.63 | 2.69 | 2.66 | 0.0072 | AT1G80160 |
| 0.00 | 2.64 | 2.68 | 2.66 | 0.0048 | AT3G59550 |
| 0.00 | 2.48 | 2.85 | 2.66 | 0.0441 | AT4G37580 |
| 0.00 | 2.50 | 2.81 | 2.66 | 0.0371 | AT5G12900 |
| 0.00 | 2.49 | 2.82 | 2.66 | 0.0395 | AT2G13820 |
| 0.00 | 2.53 | 2.77 | 2.65 | 0.0288 | AT3G26445 |
| 0.00 | 2.67 | 2.63 | 2.65 | 0.0048 | AT1G09200 |
| 0.00 | 2.64 | 2.66 | 2.65 | 0.0024 | AT1G29640 |

|      |      |      |      |        |           |
|------|------|------|------|--------|-----------|
| 0.00 | 2.45 | 2.85 | 2.65 | 0.0480 | AT3G56480 |
| 0.00 | 2.83 | 2.47 | 2.65 | 0.0432 | AT1G27120 |
| 0.00 | 2.50 | 2.78 | 2.64 | 0.0337 | AT5G20270 |
| 0.00 | 2.65 | 2.63 | 2.64 | 0.0024 | AT1G14580 |
| 0.00 | 2.59 | 2.69 | 2.64 | 0.0121 | AT4G15690 |
| 0.00 | 2.53 | 2.75 | 2.64 | 0.0265 | AT2G02780 |
| 0.00 | 2.47 | 2.80 | 2.63 | 0.0398 | AT2G38110 |
| 0.00 | 2.74 | 2.53 | 2.63 | 0.0254 | AT1G75390 |
| 0.00 | 2.57 | 2.70 | 2.63 | 0.0157 | AT5G51890 |
| 0.00 | 2.66 | 2.60 | 2.63 | 0.0073 | AT3G11600 |
| 0.00 | 2.60 | 2.67 | 2.63 | 0.0085 | AT3G43160 |
| 0.00 | 2.47 | 2.79 | 2.63 | 0.0387 | AT5G10310 |
| 0.00 | 2.55 | 2.71 | 2.63 | 0.0194 | AT4G20430 |
| 0.00 | 2.56 | 2.70 | 2.63 | 0.0169 | AT2G01660 |
| 0.00 | 2.60 | 2.64 | 2.62 | 0.0049 | AT4G33330 |
| 0.00 | 2.55 | 2.69 | 2.62 | 0.0170 | AT1G03010 |
| 0.00 | 2.48 | 2.76 | 2.62 | 0.0340 | AT5G22140 |
| 0.00 | 2.48 | 2.76 | 2.62 | 0.0340 | AT4G36770 |
| 0.00 | 2.54 | 2.69 | 2.61 | 0.0183 | AT5G24570 |
| 0.00 | 2.52 | 2.70 | 2.61 | 0.0219 | AT5G67230 |
| 0.00 | 2.53 | 2.69 | 2.61 | 0.0195 | AT2G30766 |
| 0.00 | 2.53 | 2.69 | 2.61 | 0.0195 | AT3G26770 |
| 0.00 | 2.56 | 2.65 | 2.61 | 0.0110 | AT4G35783 |
| 0.00 | 2.59 | 2.62 | 2.61 | 0.0037 | AT2G28330 |
| 0.00 | 2.72 | 2.49 | 2.60 | 0.0281 | AT1G53230 |
| 0.00 | 2.59 | 2.61 | 2.60 | 0.0024 | AT5G39320 |
| 0.00 | 2.58 | 2.62 | 2.60 | 0.0049 | AT1G77590 |
| 0.00 | 2.65 | 2.55 | 2.60 | 0.0122 | AT3G46770 |
| 0.00 | 2.52 | 2.67 | 2.60 | 0.0184 | AT2G16440 |
| 0.00 | 2.48 | 2.71 | 2.59 | 0.0282 | AT1G19940 |
| 0.00 | 2.51 | 2.68 | 2.59 | 0.0208 | AT2G27130 |
| 0.00 | 2.65 | 2.54 | 2.59 | 0.0135 | AT1G49580 |
| 0.00 | 2.52 | 2.67 | 2.59 | 0.0184 | AT1G15870 |
| 0.00 | 2.64 | 2.55 | 2.59 | 0.0110 | AT1G20870 |
| 0.00 | 2.63 | 2.56 | 2.59 | 0.0086 | AT1G66730 |
| 0.00 | 2.73 | 2.45 | 2.59 | 0.0344 | AT1G10370 |
| 0.00 | 2.51 | 2.66 | 2.59 | 0.0185 | AT4G28703 |
| 0.00 | 2.56 | 2.61 | 2.58 | 0.0062 | AT5G05965 |
| 0.00 | 2.58 | 2.58 | 2.58 | 0.0000 | AT2G33560 |
| 0.00 | 2.66 | 2.50 | 2.58 | 0.0197 | AT5G59690 |
| 0.00 | 2.57 | 2.58 | 2.58 | 0.0012 | AT4G37295 |
| 0.00 | 2.48 | 2.68 | 2.58 | 0.0247 | AT3G28917 |
| 0.00 | 2.48 | 2.67 | 2.58 | 0.0235 | AT1G29660 |
| 0.00 | 2.42 | 2.72 | 2.57 | 0.0371 | AT4G38050 |
| 0.00 | 2.72 | 2.42 | 2.57 | 0.0371 | AT5G07720 |
| 0.00 | 2.41 | 2.73 | 2.57 | 0.0396 | AT4G11180 |
| 0.00 | 2.64 | 2.50 | 2.57 | 0.0173 | AT1G72270 |
| 0.00 | 2.39 | 2.75 | 2.57 | 0.0445 | AT1G62870 |
| 0.00 | 2.62 | 2.51 | 2.57 | 0.0136 | AT3G13000 |
| 0.00 | 2.42 | 2.70 | 2.56 | 0.0348 | AT5G15310 |
| 0.00 | 2.68 | 2.44 | 2.56 | 0.0298 | AT1G12330 |
| 0.00 | 2.66 | 2.45 | 2.56 | 0.0261 | AT4G30800 |
| 0.00 | 2.67 | 2.45 | 2.56 | 0.0273 | AT1G75550 |
| 0.00 | 2.44 | 2.67 | 2.56 | 0.0286 | AT2G24230 |
| 0.00 | 2.51 | 2.60 | 2.55 | 0.0112 | AT5G11460 |
| 0.00 | 1.24 | 3.86 | 2.55 | 0.0076 | AT2G47520 |
| 0.00 | 2.45 | 2.65 | 2.55 | 0.0250 | AT5G07590 |
| 0.00 | 2.45 | 2.66 | 2.55 | 0.0261 | AT2G29130 |
| 0.00 | 2.58 | 2.52 | 2.55 | 0.0075 | AT4G33400 |

|      |      |      |      |        |           |
|------|------|------|------|--------|-----------|
| 0.00 | 2.45 | 2.66 | 2.55 | 0.0261 | AT3G22830 |
| 0.00 | 2.60 | 2.51 | 2.55 | 0.0112 | AT3G14890 |
| 0.00 | 2.61 | 2.49 | 2.55 | 0.0150 | AT1G60390 |
| 0.00 | 2.35 | 2.75 | 2.55 | 0.0498 | AT1G19060 |
| 0.00 | 2.70 | 2.40 | 2.55 | 0.0374 | AT4G09510 |
| 0.00 | 2.38 | 2.72 | 2.55 | 0.0424 | AT3G08030 |
| 0.00 | 2.49 | 2.61 | 2.55 | 0.0150 | AT2G37560 |
| 0.00 | 2.35 | 2.74 | 2.55 | 0.0487 | AT5G23780 |
| 0.00 | 2.44 | 2.64 | 2.54 | 0.0251 | AT1G68800 |
| 0.00 | 2.50 | 2.58 | 2.54 | 0.0100 | AT1G77760 |
| 0.00 | 2.64 | 2.44 | 2.54 | 0.0251 | AT5G18600 |
| 0.00 | 2.59 | 2.48 | 2.54 | 0.0138 | AT2G22190 |
| 0.00 | 2.56 | 2.51 | 2.54 | 0.0063 | AT4G17180 |
| 0.00 | 2.45 | 2.61 | 2.53 | 0.0201 | AT1G29395 |
| 0.00 | 2.61 | 2.45 | 2.53 | 0.0201 | AT2G43800 |
| 0.00 | 2.51 | 2.55 | 2.53 | 0.0050 | AT3G06140 |
| 0.00 | 2.64 | 2.41 | 2.53 | 0.0290 | AT4G25433 |
| 0.00 | 2.37 | 2.69 | 2.53 | 0.0402 | AT5G09980 |
| 0.00 | 2.56 | 2.49 | 2.53 | 0.0088 | AT2G33400 |
| 0.00 | 2.46 | 2.59 | 2.53 | 0.0164 | AT5G08260 |
| 0.00 | 2.55 | 2.50 | 2.52 | 0.0063 | AT1G69480 |
| 0.00 | 2.62 | 2.43 | 2.52 | 0.0239 | AT5G27450 |
| 0.00 | 2.52 | 2.52 | 2.52 | 0.0000 | AT2G25530 |
| 0.00 | 2.63 | 2.41 | 2.52 | 0.0278 | AT1G66760 |
| 0.00 | 2.44 | 2.60 | 2.52 | 0.0202 | AT4G22470 |
| 0.00 | 2.59 | 2.45 | 2.52 | 0.0177 | AT2G16060 |
| 0.00 | 2.45 | 2.58 | 2.52 | 0.0164 | AT4G32290 |
| 0.00 | 2.62 | 2.41 | 2.51 | 0.0266 | AT5G63650 |
| 0.00 | 2.39 | 2.63 | 2.51 | 0.0304 | AT3G52940 |
| 0.00 | 2.64 | 2.38 | 2.51 | 0.0329 | AT3G60530 |
| 0.00 | 2.34 | 2.67 | 2.51 | 0.0419 | AT1G56670 |
| 0.00 | 2.63 | 2.38 | 2.51 | 0.0317 | AT5G27550 |
| 0.00 | 2.66 | 2.35 | 2.50 | 0.0393 | AT5G10020 |
| 0.00 | 2.58 | 2.42 | 2.50 | 0.0204 | AT5G58960 |
| 0.00 | 2.40 | 2.60 | 2.50 | 0.0255 | AT1G78370 |
| 0.00 | 2.39 | 2.60 | 2.49 | 0.0268 | AT1G62050 |
| 0.00 | 2.53 | 2.46 | 2.49 | 0.0089 | AT3G49250 |
| 0.00 | 2.35 | 2.64 | 2.49 | 0.0370 | AT1G11740 |
| 0.00 | 2.45 | 2.53 | 2.49 | 0.0102 | AT4G35100 |
| 0.00 | 2.36 | 2.62 | 2.49 | 0.0332 | AT3G05330 |
| 0.00 | 2.63 | 2.35 | 2.49 | 0.0358 | AT3G66656 |
| 0.00 | 2.68 | 2.29 | 2.48 | 0.0499 | AT1G03120 |
| 0.00 | 2.57 | 2.39 | 2.48 | 0.0231 | AT3G48980 |
| 0.00 | 2.62 | 2.34 | 2.48 | 0.0359 | AT3G22790 |
| 0.00 | 2.52 | 2.44 | 2.48 | 0.0103 | AT4G04460 |
| 0.00 | 2.37 | 2.59 | 2.48 | 0.0282 | AT2G40085 |
| 0.00 | 2.59 | 2.36 | 2.48 | 0.0296 | AT3G25860 |
| 0.00 | 2.45 | 2.50 | 2.48 | 0.0064 | AT1G58340 |
| 0.00 | 2.64 | 2.31 | 2.48 | 0.0424 | AT2G35730 |
| 0.00 | 2.55 | 2.40 | 2.48 | 0.0193 | AT5G05240 |
| 0.00 | 2.28 | 2.66 | 2.47 | 0.0489 | AT1G48100 |
| 0.00 | 2.43 | 2.52 | 2.47 | 0.0116 | AT1G21150 |
| 0.00 | 2.30 | 2.64 | 2.47 | 0.0437 | AT2G28710 |
| 0.00 | 2.55 | 2.40 | 2.47 | 0.0193 | AT5G23910 |
| 0.00 | 2.32 | 2.62 | 2.47 | 0.0386 | AT1G19450 |
| 0.00 | 2.58 | 2.35 | 2.47 | 0.0297 | AT5G22200 |
| 0.00 | 2.32 | 2.61 | 2.46 | 0.0374 | AT5G52900 |
| 0.00 | 2.54 | 2.38 | 2.46 | 0.0207 | AT1G76740 |
| 0.00 | 2.60 | 2.32 | 2.46 | 0.0362 | AT1G67630 |

|      |      |      |      |        |           |
|------|------|------|------|--------|-----------|
| 0.00 | 2.51 | 2.41 | 2.46 | 0.0129 | AT3G47600 |
| 0.00 | 2.47 | 2.45 | 2.46 | 0.0026 | AT1G08810 |
| 0.00 | 2.32 | 2.60 | 2.46 | 0.0362 | AT5G10620 |
| 0.00 | 2.52 | 2.39 | 2.46 | 0.0169 | AT1G80850 |
| 0.00 | 2.56 | 2.35 | 2.45 | 0.0272 | AT5G15210 |
| 0.00 | 2.33 | 2.57 | 2.45 | 0.0312 | AT3G24630 |
| 0.00 | 2.33 | 2.57 | 2.45 | 0.0312 | AT4G27730 |
| 0.00 | 2.44 | 2.46 | 2.45 | 0.0026 | AT1G35780 |
| 0.00 | 2.28 | 2.61 | 2.45 | 0.0429 | AT4G14200 |
| 0.00 | 2.58 | 2.32 | 2.45 | 0.0337 | AT1G10550 |
| 0.00 | 2.53 | 2.36 | 2.45 | 0.0221 | AT3G63110 |
| 0.00 | 2.36 | 2.53 | 2.45 | 0.0221 | AT4G22250 |
| 0.00 | 2.50 | 2.38 | 2.44 | 0.0157 | AT5G45630 |
| 0.00 | 2.54 | 2.34 | 2.44 | 0.0261 | AT3G61930 |
| 0.00 | 2.25 | 2.63 | 2.44 | 0.0495 | AT3G46660 |
| 0.00 | 2.51 | 2.36 | 2.44 | 0.0196 | AT4G12440 |
| 0.00 | 2.36 | 2.51 | 2.44 | 0.0196 | AT2G47485 |
| 0.00 | 2.29 | 2.58 | 2.44 | 0.0379 | AT5G23420 |
| 0.00 | 2.42 | 2.46 | 2.44 | 0.0052 | AT5G11510 |
| 0.00 | 2.26 | 2.61 | 2.44 | 0.0457 | AT5G08150 |
| 0.00 | 2.33 | 2.53 | 2.43 | 0.0262 | AT4G28180 |
| 0.00 | 2.55 | 2.30 | 2.43 | 0.0328 | AT3G14740 |
| 0.00 | 2.56 | 2.29 | 2.42 | 0.0354 | AT4G10910 |
| 0.00 | 2.38 | 2.46 | 2.42 | 0.0105 | AT3G03170 |
| 0.00 | 2.42 | 2.42 | 2.42 | 0.0000 | AT1G10030 |
| 0.00 | 2.53 | 2.29 | 2.41 | 0.0317 | AT5G24280 |
| 0.00 | 2.37 | 2.46 | 2.41 | 0.0119 | AT3G54750 |
| 0.00 | 2.30 | 2.52 | 2.41 | 0.0290 | AT4G36360 |
| 0.00 | 2.29 | 2.53 | 2.41 | 0.0317 | AT2G41940 |
| 0.00 | 2.26 | 2.55 | 2.41 | 0.0383 | AT4G25845 |
| 0.00 | 2.43 | 2.38 | 2.41 | 0.0066 | AT3G19820 |
| 0.00 | 2.31 | 2.50 | 2.40 | 0.0251 | AT1G11130 |
| 0.00 | 2.42 | 2.39 | 2.40 | 0.0040 | AT1G65295 |
| 0.00 | 2.25 | 2.55 | 2.40 | 0.0397 | AT1G56430 |
| 0.00 | 2.46 | 2.34 | 2.40 | 0.0159 | AT2G26580 |
| 0.00 | 2.42 | 2.38 | 2.40 | 0.0053 | AT2G43050 |
| 0.00 | 2.49 | 2.31 | 2.40 | 0.0239 | AT2G43040 |
| 0.00 | 2.43 | 2.37 | 2.40 | 0.0080 | AT4G22756 |
| 0.00 | 2.48 | 2.32 | 2.40 | 0.0212 | AT1G51440 |
| 0.00 | 2.33 | 2.46 | 2.40 | 0.0173 | AT5G02220 |
| 0.00 | 2.50 | 2.29 | 2.39 | 0.0279 | AT2G35585 |
| 0.00 | 2.41 | 2.38 | 2.39 | 0.0040 | AT1G16920 |
| 0.00 | 2.41 | 2.37 | 2.39 | 0.0053 | AT5G66310 |
| 0.00 | 2.22 | 2.56 | 2.39 | 0.0452 | AT3G44610 |
| 0.00 | 2.50 | 2.28 | 2.39 | 0.0293 | AT5G11230 |
| 0.00 | 2.39 | 2.38 | 2.39 | 0.0013 | AT5G61130 |
| 0.00 | 2.54 | 2.22 | 2.38 | 0.0427 | AT1G51130 |
| 0.00 | 2.30 | 2.46 | 2.38 | 0.0214 | AT4G10960 |
| 0.00 | 2.33 | 2.43 | 2.38 | 0.0134 | AT2G44690 |
| 0.00 | 2.31 | 2.44 | 2.38 | 0.0174 | AT5G44040 |
| 0.00 | 2.26 | 2.49 | 2.38 | 0.0308 | AT3G01550 |
| 0.00 | 2.44 | 2.32 | 2.38 | 0.0160 | AT1G16780 |
| 0.00 | 2.33 | 2.42 | 2.37 | 0.0121 | AT5G66660 |
| 0.00 | 2.29 | 2.45 | 2.37 | 0.0215 | AT5G54510 |
| 0.00 | 2.28 | 2.46 | 2.37 | 0.0242 | AT1G19510 |
| 0.00 | 2.20 | 2.55 | 2.37 | 0.0468 | AT1G67600 |
| 0.00 | 2.24 | 2.50 | 2.37 | 0.0349 | AT4G20140 |
| 0.00 | 2.35 | 2.38 | 2.37 | 0.0040 | AT2G24170 |
| 0.00 | 2.35 | 2.39 | 2.37 | 0.0054 | AT5G50420 |

|      |      |      |      |        |           |
|------|------|------|------|--------|-----------|
| 0.00 | 2.23 | 2.50 | 2.37 | 0.0363 | AT4G22235 |
| 0.00 | 2.52 | 2.21 | 2.36 | 0.0417 | AT2G47360 |
| 0.00 | 2.38 | 2.34 | 2.36 | 0.0054 | AT3G50700 |
| 0.00 | 2.35 | 2.37 | 2.36 | 0.0027 | AT1G33480 |
| 0.00 | 2.45 | 2.27 | 2.36 | 0.0243 | AT3G51240 |
| 0.00 | 2.25 | 2.47 | 2.36 | 0.0297 | AT1G60960 |
| 0.00 | 2.49 | 2.22 | 2.36 | 0.0365 | AT4G09170 |
| 0.00 | 2.39 | 2.31 | 2.35 | 0.0108 | AT2G45360 |
| 0.00 | 2.38 | 2.32 | 2.35 | 0.0081 | AT1G71870 |
| 0.00 | 2.30 | 2.40 | 2.35 | 0.0135 | AT1G02190 |
| 0.00 | 2.37 | 2.33 | 2.35 | 0.0054 | AT1G27045 |
| 0.00 | 2.21 | 2.48 | 2.35 | 0.0366 | AT5G44010 |
| 0.00 | 2.25 | 2.44 | 2.34 | 0.0258 | AT1G12380 |
| 0.00 | 2.44 | 2.25 | 2.34 | 0.0258 | AT2G44130 |
| 0.00 | 2.24 | 2.44 | 2.34 | 0.0272 | AT5G19090 |
| 0.00 | 2.42 | 2.26 | 2.34 | 0.0218 | AT5G47380 |
| 0.00 | 2.30 | 2.37 | 2.34 | 0.0095 | AT2G16760 |
| 0.00 | 2.36 | 2.32 | 2.34 | 0.0054 | AT3G28857 |
| 0.00 | 2.47 | 2.20 | 2.34 | 0.0368 | AT1G62520 |
| 0.00 | 2.22 | 2.45 | 2.33 | 0.0313 | AT1G19950 |
| 0.00 | 2.40 | 2.27 | 2.33 | 0.0177 | AT2G04235 |
| 0.00 | 2.25 | 2.41 | 2.33 | 0.0218 | AT5G10160 |
| 0.00 | 2.01 | 2.64 | 2.33 | 0.0378 | AT3G09640 |
| 0.00 | 2.33 | 2.32 | 2.32 | 0.0014 | AT1G28700 |
| 0.00 | 2.41 | 2.24 | 2.32 | 0.0233 | AT1G53160 |
| 0.00 | 2.30 | 2.34 | 2.32 | 0.0055 | AT4G36105 |
| 0.00 | 2.47 | 2.16 | 2.32 | 0.0426 | AT2G21800 |
| 0.00 | 2.22 | 2.40 | 2.31 | 0.0248 | AT1G51060 |
| 0.00 | 2.34 | 2.28 | 2.31 | 0.0083 | AT2G24440 |
| 0.00 | 2.18 | 2.44 | 2.31 | 0.0358 | AT1G34430 |
| 0.00 | 2.34 | 2.27 | 2.31 | 0.0097 | AT2G42090 |
| 0.00 | 2.38 | 2.24 | 2.31 | 0.0193 | AT4G31380 |
| 0.00 | 2.17 | 2.44 | 2.31 | 0.0372 | AT1G12860 |
| 0.00 | 2.24 | 2.37 | 2.31 | 0.0179 | AT1G18350 |
| 0.00 | 2.28 | 2.33 | 2.31 | 0.0069 | AT1G79480 |
| 0.00 | 2.12 | 2.48 | 2.30 | 0.0497 | AT4G08040 |
| 0.00 | 2.32 | 2.28 | 2.30 | 0.0055 | AT3G51600 |
| 0.00 | 2.29 | 2.31 | 2.30 | 0.0028 | AT3G25700 |
| 0.00 | 2.36 | 2.24 | 2.30 | 0.0166 | AT5G39890 |
| 0.00 | 2.41 | 2.19 | 2.30 | 0.0304 | AT1G28390 |
| 0.00 | 2.15 | 2.45 | 2.30 | 0.0415 | AT2G03505 |
| 0.00 | 2.37 | 2.23 | 2.30 | 0.0194 | AT3G54920 |
| 0.00 | 2.27 | 2.33 | 2.30 | 0.0083 | AT1G70895 |
| 0.00 | 2.48 | 2.12 | 2.30 | 0.0497 | AT1G19330 |
| 0.00 | 2.41 | 2.19 | 2.30 | 0.0304 | AT5G62550 |
| 0.00 | 2.24 | 2.35 | 2.29 | 0.0153 | AT4G23640 |
| 0.00 | 2.34 | 2.25 | 2.29 | 0.0125 | AT5G15960 |
| 0.00 | 2.25 | 2.33 | 2.29 | 0.0111 | AT4G04080 |
| 0.00 | 2.17 | 2.40 | 2.29 | 0.0320 | AT1G55330 |
| 0.00 | 2.33 | 2.24 | 2.28 | 0.0125 | AT5G42120 |
| 0.00 | 2.22 | 2.34 | 2.28 | 0.0167 | AT3G43270 |
| 0.00 | 2.34 | 2.22 | 2.28 | 0.0167 | AT5G18660 |
| 0.00 | 2.20 | 2.36 | 2.28 | 0.0223 | AT4G24140 |
| 0.00 | 2.33 | 2.22 | 2.28 | 0.0154 | AT3G62050 |
| 0.00 | 2.12 | 2.43 | 2.28 | 0.0433 | AT4G33600 |
| 0.00 | 2.33 | 2.22 | 2.27 | 0.0154 | AT1G50240 |
| 0.00 | 2.45 | 2.10 | 2.27 | 0.0489 | AT5G17980 |
| 0.00 | 2.31 | 2.24 | 2.27 | 0.0098 | AT1G30040 |
| 0.00 | 2.34 | 2.19 | 2.27 | 0.0211 | AT4G04890 |

|      |      |      |      |        |           |
|------|------|------|------|--------|-----------|
| 0.00 | 2.38 | 2.15 | 2.27 | 0.0323 | AT4G17190 |
| 0.00 | 2.44 | 2.09 | 2.26 | 0.0491 | AT2G39900 |
| 0.00 | 2.18 | 2.35 | 2.26 | 0.0239 | AT1G07090 |
| 0.00 | 2.18 | 2.35 | 2.26 | 0.0239 | AT4G16360 |
| 0.00 | 2.41 | 2.12 | 2.26 | 0.0407 | AT4G32710 |
| 0.00 | 2.33 | 2.19 | 2.26 | 0.0197 | AT1G15190 |
| 0.00 | 2.11 | 2.41 | 2.26 | 0.0422 | AT2G42200 |
| 0.00 | 2.25 | 2.26 | 2.26 | 0.0014 | AT2G43550 |
| 0.00 | 2.14 | 2.37 | 2.26 | 0.0324 | AT3G59140 |
| 0.00 | 2.26 | 2.25 | 2.25 | 0.0014 | AT3G63060 |
| 0.00 | 2.28 | 2.22 | 2.25 | 0.0085 | AT1G80270 |
| 0.00 | 2.39 | 2.11 | 2.25 | 0.0396 | AT2G45340 |
| 0.00 | 2.09 | 2.41 | 2.25 | 0.0452 | AT2G43660 |
| 0.00 | 2.10 | 2.40 | 2.25 | 0.0424 | AT1G01300 |
| 0.00 | 2.24 | 2.26 | 2.25 | 0.0028 | AT1G21810 |
| 0.00 | 2.28 | 2.21 | 2.25 | 0.0099 | AT2G29050 |
| 0.00 | 2.28 | 2.21 | 2.25 | 0.0099 | AT5G21100 |
| 0.00 | 2.20 | 2.29 | 2.25 | 0.0128 | AT1G30570 |
| 0.00 | 2.26 | 2.23 | 2.24 | 0.0043 | AT5G62360 |
| 0.00 | 2.37 | 2.12 | 2.24 | 0.0354 | AT2G26640 |
| 0.00 | 2.07 | 2.42 | 2.24 | 0.0495 | AT4G12490 |
| 0.00 | 2.19 | 2.29 | 2.24 | 0.0142 | AT4G32830 |
| 0.00 | 2.08 | 2.40 | 2.24 | 0.0454 | AT5G42720 |
| 0.00 | 2.28 | 2.20 | 2.24 | 0.0114 | AT1G02340 |
| 0.00 | 2.40 | 2.07 | 2.24 | 0.0469 | AT3G18490 |
| 0.00 | 2.25 | 2.22 | 2.24 | 0.0043 | AT5G07140 |
| 0.00 | 2.10 | 2.36 | 2.23 | 0.0371 | AT4G02100 |
| 0.00 | 2.31 | 2.15 | 2.23 | 0.0228 | AT4G22010 |
| 0.00 | 2.27 | 2.18 | 2.23 | 0.0129 | AT1G70370 |
| 0.00 | 2.30 | 2.16 | 2.23 | 0.0200 | AT4G00893 |
| 0.00 | 2.39 | 2.06 | 2.22 | 0.0471 | AT3G22640 |
| 0.00 | 2.06 | 2.39 | 2.22 | 0.0471 | AT1G71020 |
| 0.00 | 2.32 | 2.13 | 2.22 | 0.0272 | AT1G17030 |
| 0.00 | 2.27 | 2.17 | 2.22 | 0.0143 | AT1G14180 |
| 0.00 | 2.14 | 2.30 | 2.22 | 0.0229 | AT5G64850 |
| 0.00 | 2.29 | 2.15 | 2.22 | 0.0201 | AT2G24970 |
| 0.00 | 2.29 | 2.15 | 2.22 | 0.0201 | AT3G18550 |
| 0.00 | 2.10 | 2.34 | 2.22 | 0.0344 | AT4G35650 |
| 0.00 | 2.32 | 2.11 | 2.22 | 0.0302 | AT1G53870 |
| 0.00 | 2.06 | 2.37 | 2.22 | 0.0445 | AT5G37980 |
| 0.00 | 2.20 | 2.23 | 2.21 | 0.0043 | AT3G04470 |
| 0.00 | 2.37 | 2.06 | 2.21 | 0.0445 | AT5G01890 |
| 0.00 | 2.10 | 2.32 | 2.21 | 0.0317 | AT1G29670 |
| 0.00 | 2.16 | 2.26 | 2.21 | 0.0144 | AT3G23805 |
| 0.00 | 2.27 | 2.14 | 2.21 | 0.0188 | AT1G10270 |
| 0.00 | 2.06 | 2.35 | 2.20 | 0.0418 | AT4G37770 |
| 0.00 | 2.07 | 2.33 | 2.20 | 0.0376 | AT1G02450 |
| 0.00 | 2.17 | 2.22 | 2.20 | 0.0073 | AT2G01120 |
| 0.00 | 2.15 | 2.24 | 2.20 | 0.0130 | AT2G30200 |
| 0.00 | 2.13 | 2.26 | 2.19 | 0.0188 | AT5G25590 |
| 0.00 | 2.05 | 2.34 | 2.19 | 0.0420 | AT4G36540 |
| 0.00 | 2.17 | 2.21 | 2.19 | 0.0058 | AT1G75960 |
| 0.00 | 2.13 | 2.26 | 2.19 | 0.0188 | AT5G57700 |
| 0.00 | 2.33 | 2.05 | 2.19 | 0.0406 | AT5G65350 |
| 0.00 | 2.22 | 2.15 | 2.19 | 0.0102 | AT1G10560 |
| 0.00 | 2.15 | 2.22 | 2.18 | 0.0102 | AT4G23690 |
| 0.00 | 2.15 | 2.22 | 2.18 | 0.0102 | AT5G47230 |
| 0.00 | 2.12 | 2.25 | 2.18 | 0.0189 | AT1G78770 |
| 0.00 | 2.07 | 2.29 | 2.18 | 0.0321 | AT5G13710 |

|      |      |      |      |        |           |
|------|------|------|------|--------|-----------|
| 0.00 | 2.24 | 2.12 | 2.18 | 0.0175 | AT1G21060 |
| 0.00 | 2.04 | 2.33 | 2.18 | 0.0422 | AT5G26000 |
| 0.00 | 2.05 | 2.31 | 2.18 | 0.0379 | AT4G19230 |
| 0.00 | 2.13 | 2.22 | 2.18 | 0.0132 | AT5G11690 |
| 0.00 | 2.07 | 2.28 | 2.18 | 0.0307 | AT4G30410 |
| 0.00 | 2.35 | 2.01 | 2.18 | 0.0495 | AT2G44930 |
| 0.00 | 2.32 | 2.02 | 2.17 | 0.0439 | AT1G06450 |
| 0.00 | 2.19 | 2.15 | 2.17 | 0.0059 | AT1G03070 |
| 0.00 | 2.12 | 2.22 | 2.17 | 0.0147 | AT3G07960 |
| 0.00 | 2.24 | 2.09 | 2.16 | 0.0220 | AT2G29370 |
| 0.00 | 2.18 | 2.14 | 2.16 | 0.0059 | AT4G40010 |
| 0.00 | 2.06 | 2.26 | 2.16 | 0.0295 | AT2G17370 |
| 0.00 | 2.01 | 2.32 | 2.16 | 0.0455 | AT1G73360 |
| 0.00 | 2.31 | 2.01 | 2.16 | 0.0441 | AT5G57240 |
| 0.00 | 2.15 | 2.17 | 2.16 | 0.0029 | AT3G29810 |
| 0.00 | 2.19 | 2.13 | 2.16 | 0.0088 | AT2G23700 |
| 0.00 | 2.04 | 2.28 | 2.16 | 0.0353 | AT5G49665 |
| 0.00 | 2.13 | 2.18 | 2.16 | 0.0074 | AT3G20670 |
| 0.00 | 2.16 | 2.15 | 2.15 | 0.0015 | AT5G41460 |
| 0.00 | 1.99 | 2.32 | 2.15 | 0.0486 | AT1G17830 |
| 0.00 | 2.01 | 2.30 | 2.15 | 0.0428 | AT3G06035 |
| 0.00 | 2.19 | 2.11 | 2.15 | 0.0118 | AT5G59800 |
| 0.00 | 2.26 | 2.04 | 2.15 | 0.0325 | AT5G05510 |
| 0.00 | 2.06 | 2.22 | 2.14 | 0.0238 | AT1G22570 |
| 0.00 | 2.16 | 2.12 | 2.14 | 0.0059 | AT1G75060 |
| 0.00 | 2.01 | 2.28 | 2.14 | 0.0400 | AT3G02170 |
| 0.00 | 2.31 | 1.98 | 2.14 | 0.0489 | AT5G15740 |
| 0.00 | 2.07 | 2.21 | 2.14 | 0.0208 | AT3G48970 |
| 0.00 | 2.23 | 2.05 | 2.14 | 0.0268 | AT5G47670 |
| 0.00 | 2.10 | 2.17 | 2.14 | 0.0104 | AT1G28010 |
| 0.00 | 2.17 | 2.10 | 2.14 | 0.0104 | AT5G50820 |
| 0.00 | 2.02 | 2.26 | 2.14 | 0.0357 | AT5G53830 |
| 0.00 | 2.07 | 2.20 | 2.13 | 0.0194 | AT3G13690 |
| 0.00 | 2.19 | 2.07 | 2.13 | 0.0179 | AT1G07420 |
| 0.00 | 2.08 | 2.18 | 2.13 | 0.0149 | AT2G34850 |
| 0.00 | 1.99 | 2.27 | 2.13 | 0.0418 | AT2G03200 |
| 0.00 | 2.04 | 2.22 | 2.13 | 0.0269 | AT1G55205 |
| 0.00 | 2.10 | 2.16 | 2.13 | 0.0090 | AT5G16080 |
| 0.00 | 2.16 | 2.10 | 2.13 | 0.0090 | AT1G78340 |
| 0.00 | 2.16 | 2.10 | 2.13 | 0.0090 | AT3G28040 |
| 0.00 | 2.28 | 1.97 | 2.13 | 0.0464 | AT3G26922 |
| 0.00 | 2.05 | 2.21 | 2.13 | 0.0239 | AT2G22600 |
| 0.00 | 2.11 | 2.14 | 2.13 | 0.0045 | AT5G25830 |
| 0.00 | 2.24 | 2.01 | 2.12 | 0.0344 | AT1G68400 |
| 0.00 | 2.14 | 2.10 | 2.12 | 0.0060 | AT2G26910 |
| 0.00 | 2.11 | 2.13 | 2.12 | 0.0030 | AT3G13672 |
| 0.00 | 2.09 | 2.15 | 2.12 | 0.0090 | AT2G25685 |
| 0.00 | 2.16 | 2.08 | 2.12 | 0.0120 | AT1G70830 |
| 0.00 | 2.15 | 2.08 | 2.12 | 0.0105 | AT1G53060 |
| 0.00 | 2.19 | 2.05 | 2.12 | 0.0210 | AT2G28740 |
| 0.00 | 2.21 | 2.02 | 2.12 | 0.0286 | AT1G65010 |
| 0.00 | 2.24 | 1.99 | 2.11 | 0.0376 | AT5G06590 |
| 0.00 | 1.99 | 2.23 | 2.11 | 0.0362 | AT3G15020 |
| 0.00 | 1.98 | 2.23 | 2.11 | 0.0378 | AT5G50940 |
| 0.00 | 2.08 | 2.13 | 2.11 | 0.0076 | AT4G19460 |
| 0.00 | 2.07 | 2.14 | 2.11 | 0.0106 | AT3G20150 |
| 0.00 | 2.19 | 2.02 | 2.10 | 0.0257 | AT5G43870 |
| 0.00 | 2.15 | 2.05 | 2.10 | 0.0152 | AT4G22290 |
| 0.00 | 2.07 | 2.12 | 2.10 | 0.0076 | AT4G35840 |



|      |      |      |      |        |           |
|------|------|------|------|--------|-----------|
| 0.00 | 2.20 | 1.99 | 2.10 | 0.0319 | AT1G08280 |
| 0.00 | 2.05 | 2.14 | 2.10 | 0.0137 | AT3G62630 |
| 0.00 | 2.00 | 2.19 | 2.09 | 0.0288 | AT2G34920 |
| 0.00 | 1.97 | 2.21 | 2.09 | 0.0365 | AT5G44020 |
| 0.00 | 2.02 | 2.16 | 2.09 | 0.0213 | AT2G48030 |
| 0.00 | 2.03 | 2.14 | 2.09 | 0.0168 | AT5G05390 |
| 0.00 | 2.00 | 2.17 | 2.09 | 0.0259 | AT5G41060 |
| 0.00 | 1.98 | 2.18 | 2.08 | 0.0306 | AT2G41650 |
| 0.00 | 2.68 | 1.48 | 2.08 | 0.0256 | AT1G20620 |
| 0.00 | 2.04 | 2.11 | 2.08 | 0.0107 | AT3G46550 |
| 0.00 | 2.15 | 2.00 | 2.07 | 0.0230 | AT3G56570 |
| 0.00 | 2.03 | 2.12 | 2.07 | 0.0138 | AT3G03680 |
| 0.00 | 2.14 | 2.01 | 2.07 | 0.0199 | AT5G35120 |
| 0.00 | 2.16 | 1.99 | 2.07 | 0.0261 | AT1G72140 |
| 0.00 | 2.03 | 2.11 | 2.07 | 0.0123 | AT2G18340 |
| 0.00 | 2.11 | 2.03 | 2.07 | 0.0123 | AT2G29570 |
| 0.00 | 2.15 | 1.98 | 2.07 | 0.0262 | AT1G59930 |
| 0.00 | 2.03 | 2.10 | 2.07 | 0.0108 | AT3G04850 |
| 0.00 | 1.95 | 2.18 | 2.07 | 0.0354 | AT5G10480 |
| 0.00 | 2.02 | 2.11 | 2.07 | 0.0139 | AT3G59900 |
| 0.00 | 2.07 | 2.06 | 2.06 | 0.0015 | AT1G04820 |
| 0.00 | 2.14 | 1.99 | 2.06 | 0.0231 | AT4G02170 |
| 0.00 | 1.92 | 2.21 | 2.06 | 0.0446 | AT5G22870 |
| 0.00 | 1.97 | 2.15 | 2.06 | 0.0278 | AT3G52370 |
| 0.00 | 1.91 | 2.21 | 2.06 | 0.0463 | AT2G46970 |
| 0.00 | 2.06 | 2.06 | 2.06 | 0.0000 | AT5G46570 |
| 0.00 | 1.99 | 2.12 | 2.06 | 0.0201 | AT2G33640 |
| 0.00 | 1.93 | 2.18 | 2.05 | 0.0387 | AT5G46710 |
| 0.00 | 2.19 | 1.92 | 2.05 | 0.0418 | AT5G46290 |
| 0.00 | 2.01 | 2.10 | 2.05 | 0.0139 | AT2G37585 |
| 0.00 | 1.95 | 2.16 | 2.05 | 0.0325 | AT3G22070 |
| 0.00 | 1.91 | 2.19 | 2.05 | 0.0434 | AT4G00390 |
| 0.00 | 2.07 | 2.02 | 2.05 | 0.0078 | AT3G23167 |
| 0.00 | 1.97 | 2.12 | 2.04 | 0.0233 | AT1G15950 |
| 0.00 | 2.18 | 1.91 | 2.04 | 0.0420 | AT2G01760 |
| 0.00 | 1.98 | 2.10 | 2.04 | 0.0187 | AT3G16570 |
| 0.00 | 1.88 | 2.20 | 2.04 | 0.0498 | AT4G30650 |
| 0.00 | 2.18 | 1.90 | 2.04 | 0.0436 | AT4G24710 |
| 0.00 | 1.93 | 2.15 | 2.04 | 0.0343 | AT3G07990 |
| 0.00 | 2.03 | 2.05 | 2.04 | 0.0031 | AT1G22980 |
| 0.00 | 2.07 | 2.00 | 2.04 | 0.0109 | AT4G11450 |
| 0.00 | 2.11 | 1.96 | 2.03 | 0.0235 | AT5G15900 |
| 0.00 | 2.08 | 1.99 | 2.03 | 0.0141 | AT4G14150 |
| 0.00 | 2.03 | 2.03 | 2.03 | 0.0000 | AT1G65370 |
| 0.00 | 2.14 | 1.93 | 2.03 | 0.0328 | AT3G19380 |
| 0.00 | 2.15 | 1.91 | 2.03 | 0.0376 | AT1G50010 |
| 0.00 | 2.04 | 2.02 | 2.03 | 0.0031 | AT1G63230 |
| 0.00 | 1.90 | 2.16 | 2.03 | 0.0407 | AT3G28500 |
| 0.00 | 2.15 | 1.90 | 2.03 | 0.0392 | AT2G35620 |
| 0.00 | 1.92 | 2.12 | 2.02 | 0.0315 | AT4G14020 |
| 0.00 | 1.98 | 2.06 | 2.02 | 0.0126 | AT2G26730 |
| 0.00 | 1.87 | 2.17 | 2.02 | 0.0472 | AT2G42300 |
| 0.00 | 1.89 | 2.14 | 2.02 | 0.0394 | AT2G45900 |
| 0.00 | 1.97 | 2.06 | 2.02 | 0.0142 | AT3G19050 |
| 0.00 | 2.11 | 1.92 | 2.01 | 0.0300 | AT5G35670 |
| 0.00 | 1.88 | 2.14 | 2.01 | 0.0411 | AT5G67200 |
| 0.00 | 2.12 | 1.91 | 2.01 | 0.0331 | AT1G51770 |
| 0.00 | 2.00 | 2.02 | 2.01 | 0.0032 | AT4G21870 |
| 0.00 | 1.96 | 2.06 | 2.01 | 0.0158 | AT4G12970 |

|      |       |       |       |        |           |
|------|-------|-------|-------|--------|-----------|
| 0.00 | 2.05  | 1.96  | 2.01  | 0.0143 | AT4G01580 |
| 0.00 | 1.98  | 2.03  | 2.00  | 0.0079 | AT1G49730 |
| 0.00 | 2.02  | 1.98  | 2.00  | 0.0064 | AT1G07640 |
| 0.00 | 1.99  | 2.01  | 2.00  | 0.0032 | AT1G62150 |
| 0.00 | 2.13  | 1.86  | 2.00  | 0.0430 | AT2G36660 |
| 0.00 | 1.90  | 2.10  | 2.00  | 0.0318 | AT4G27230 |
| 0.00 | -1.91 | -2.08 | -2.00 | 0.0271 | AT2G46360 |
| 0.00 | -2.05 | -1.96 | -2.00 | 0.0143 | AT5G61370 |
| 0.00 | -1.87 | -2.14 | -2.00 | 0.0428 | AT4G17660 |
| 0.00 | -1.92 | -2.10 | -2.01 | 0.0285 | AT2G23900 |
| 0.00 | -2.15 | -1.87 | -2.01 | 0.0443 | AT4G36850 |
| 0.00 | -2.00 | -2.02 | -2.01 | 0.0032 | AT4G39030 |
| 0.00 | -1.89 | -2.15 | -2.02 | 0.0409 | AT4G34730 |
| 0.00 | -2.02 | -2.02 | -2.02 | 0.0000 | AT4G04490 |
| 0.00 | -2.16 | -1.88 | -2.02 | 0.0441 | AT2G36120 |
| 0.00 | -1.90 | -2.14 | -2.02 | 0.0378 | AT3G14205 |
| 0.00 | -2.04 | -2.01 | -2.02 | 0.0047 | AT5G58390 |
| 0.00 | -1.88 | -2.17 | -2.02 | 0.0455 | AT1G12780 |
| 0.00 | -1.87 | -2.18 | -2.02 | 0.0486 | AT1G76370 |
| 0.00 | -2.17 | -1.89 | -2.03 | 0.0438 | AT3G62150 |
| 0.00 | -1.96 | -2.10 | -2.03 | 0.0219 | AT4G34600 |
| 0.00 | -2.15 | -1.91 | -2.03 | 0.0376 | AT4G37920 |
| 0.00 | -1.93 | -2.13 | -2.03 | 0.0313 | AT1G78830 |
| 0.00 | -2.14 | -1.93 | -2.04 | 0.0328 | AT1G11765 |
| 0.00 | -2.14 | -1.93 | -2.04 | 0.0328 | AT2G43590 |
| 0.00 | -2.20 | -1.88 | -2.04 | 0.0498 | AT2G46690 |
| 0.00 | -1.96 | -2.12 | -2.04 | 0.0250 | AT3G63500 |
| 0.00 | -2.07 | -2.01 | -2.04 | 0.0094 | AT3G01860 |
| 0.00 | -1.94 | -2.15 | -2.04 | 0.0327 | AT1G72030 |
| 0.00 | -1.89 | -2.20 | -2.04 | 0.0482 | AT1G77230 |
| 0.00 | -1.96 | -2.13 | -2.04 | 0.0264 | AT1G52240 |
| 0.00 | -2.06 | -2.03 | -2.04 | 0.0047 | AT5G23240 |
| 0.00 | -2.04 | -2.04 | -2.04 | 0.0000 | AT5G54090 |
| 0.00 | -1.91 | -2.18 | -2.04 | 0.0420 | AT3G26220 |
| 0.00 | -2.03 | -2.06 | -2.04 | 0.0047 | AT5G41040 |
| 0.00 | -2.10 | -1.99 | -2.05 | 0.0171 | AT5G36220 |
| 0.00 | -1.90 | -2.20 | -2.05 | 0.0465 | AT1G53590 |
| 0.00 | -1.92 | -2.19 | -2.05 | 0.0418 | AT5G56640 |
| 0.00 | -2.01 | -2.10 | -2.06 | 0.0139 | AT4G03400 |
| 0.00 | -1.96 | -2.16 | -2.06 | 0.0309 | AT4G34140 |
| 0.00 | -1.91 | -2.21 | -2.06 | 0.0463 | AT4G28400 |
| 0.00 | -2.07 | -2.06 | -2.06 | 0.0015 | AT3G15620 |
| 0.00 | -2.01 | -2.12 | -2.07 | 0.0170 | AT1G80440 |
| 0.00 | -1.92 | -2.22 | -2.07 | 0.0461 | AT3G06260 |
| 0.00 | -2.05 | -2.09 | -2.07 | 0.0062 | AT5G53110 |
| 0.00 | -1.92 | -2.21 | -2.07 | 0.0446 | AT4G13810 |
| 0.00 | -2.12 | -2.02 | -2.07 | 0.0154 | AT1G65660 |
| 0.00 | -2.20 | -1.95 | -2.07 | 0.0383 | AT5G64530 |
| 0.00 | -1.93 | -2.23 | -2.08 | 0.0458 | AT5G26170 |
| 0.00 | -2.07 | -2.10 | -2.08 | 0.0046 | AT3G42640 |
| 0.00 | -2.07 | -2.10 | -2.08 | 0.0046 | AT5G57630 |
| 0.00 | -1.96 | -2.21 | -2.08 | 0.0381 | AT2G18570 |
| 0.00 | -2.15 | -2.02 | -2.09 | 0.0198 | AT4G18740 |
| 0.00 | -2.02 | -2.16 | -2.09 | 0.0213 | AT4G02660 |
| 0.00 | -2.22 | -1.96 | -2.09 | 0.0395 | AT3G01085 |
| 0.00 | -2.04 | -2.15 | -2.09 | 0.0167 | AT2G16365 |
| 0.00 | -2.19 | -2.01 | -2.10 | 0.0273 | AT1G23850 |
| 0.00 | -2.19 | -2.00 | -2.10 | 0.0288 | AT5G58660 |
| 0.00 | -2.02 | -2.18 | -2.10 | 0.0242 | AT4G13580 |

|      |       |       |       |        |           |
|------|-------|-------|-------|--------|-----------|
| 0.00 | -2.16 | -2.05 | -2.10 | 0.0166 | AT1G10990 |
| 0.00 | -2.03 | -2.18 | -2.11 | 0.0227 | AT5G65610 |
| 0.00 | -2.16 | -2.05 | -2.11 | 0.0166 | AT4G31875 |
| 0.00 | -1.95 | -2.27 | -2.11 | 0.0482 | AT1G72150 |
| 0.00 | -2.12 | -2.11 | -2.11 | 0.0015 | AT3G20190 |
| 0.00 | -1.99 | -2.24 | -2.12 | 0.0376 | AT5G55570 |
| 0.00 | -2.27 | -1.97 | -2.12 | 0.0450 | AT1G71140 |
| 0.00 | -2.16 | -2.08 | -2.12 | 0.0120 | AT4G33420 |
| 0.00 | -2.19 | -2.06 | -2.12 | 0.0195 | AT2G31500 |
| 0.00 | -2.15 | -2.11 | -2.13 | 0.0060 | AT2G29070 |
| 0.00 | -2.13 | -2.13 | -2.13 | 0.0000 | AT2G01320 |
| 0.00 | -2.02 | -2.24 | -2.13 | 0.0328 | AT3G26170 |
| 0.00 | -2.09 | -2.17 | -2.13 | 0.0120 | AT3G14420 |
| 0.00 | -2.01 | -2.25 | -2.13 | 0.0358 | AT5G67340 |
| 0.00 | -2.05 | -2.21 | -2.13 | 0.0239 | AT3G48180 |
| 0.00 | -2.10 | -2.17 | -2.14 | 0.0104 | AT5G40450 |
| 0.00 | -2.15 | -2.12 | -2.14 | 0.0045 | AT1G04350 |
| 0.00 | -2.13 | -2.15 | -2.14 | 0.0030 | AT1G55930 |
| 0.00 | -2.16 | -2.13 | -2.14 | 0.0045 | AT1G10140 |
| 0.00 | -2.06 | -2.24 | -2.15 | 0.0266 | AT2G41260 |
| 0.00 | -2.05 | -2.26 | -2.15 | 0.0310 | AT5G64890 |
| 0.00 | -2.31 | -2.00 | -2.15 | 0.0457 | AT4G14560 |
| 0.00 | -2.17 | -2.14 | -2.15 | 0.0044 | AT1G58030 |
| 0.00 | -2.00 | -2.31 | -2.15 | 0.0457 | AT1G08140 |
| 0.00 | -2.16 | -2.16 | -2.16 | 0.0000 | AT5G64100 |
| 0.00 | -2.12 | -2.21 | -2.16 | 0.0132 | AT3G50970 |
| 0.00 | -2.14 | -2.19 | -2.16 | 0.0074 | AT3G09405 |
| 0.00 | -2.15 | -2.19 | -2.17 | 0.0059 | AT1G04470 |
| 0.00 | -2.32 | -2.02 | -2.17 | 0.0439 | AT5G56870 |
| 0.00 | -2.02 | -2.33 | -2.18 | 0.0453 | AT1G23560 |
| 0.00 | -2.17 | -2.19 | -2.18 | 0.0029 | AT5G53050 |
| 0.00 | -2.04 | -2.32 | -2.18 | 0.0408 | AT5G28830 |
| 0.00 | -2.02 | -2.34 | -2.18 | 0.0466 | AT1G04540 |
| 0.00 | -2.29 | -2.10 | -2.19 | 0.0275 | AT2G36650 |
| 0.00 | -2.14 | -2.25 | -2.19 | 0.0159 | AT3G13090 |
| 0.00 | -2.30 | -2.09 | -2.19 | 0.0304 | AT3G24620 |
| 0.00 | -2.10 | -2.29 | -2.20 | 0.0275 | AT5G45490 |
| 0.00 | -2.25 | -2.14 | -2.20 | 0.0159 | AT1G01460 |
| 0.00 | -2.32 | -2.08 | -2.20 | 0.0347 | AT5G13730 |
| 0.00 | -2.03 | -2.37 | -2.20 | 0.0491 | AT1G78820 |
| 0.00 | -2.21 | -2.20 | -2.20 | 0.0014 | AT3G12500 |
| 0.00 | -2.26 | -2.15 | -2.21 | 0.0159 | AT2G14800 |
| 0.00 | -2.13 | -2.28 | -2.21 | 0.0216 | AT3G53150 |
| 0.00 | -2.07 | -2.35 | -2.21 | 0.0403 | AT5G17050 |
| 0.00 | -2.35 | -2.07 | -2.21 | 0.0403 | AT1G66870 |
| 0.00 | -2.15 | -2.27 | -2.21 | 0.0173 | AT4G01630 |
| 0.00 | -2.38 | -2.05 | -2.21 | 0.0473 | AT4G31230 |
| 0.00 | -2.27 | -2.16 | -2.22 | 0.0158 | AT5G64800 |
| 0.00 | -2.26 | -2.19 | -2.22 | 0.0100 | AT1G75700 |
| 0.00 | -2.07 | -2.39 | -2.23 | 0.0456 | AT1G33960 |
| 0.00 | -2.22 | -2.24 | -2.23 | 0.0029 | AT5G23760 |
| 0.00 | -2.24 | -2.22 | -2.23 | 0.0029 | AT4G21840 |
| 0.00 | -2.07 | -2.39 | -2.23 | 0.0456 | AT1G02820 |
| 0.00 | -2.34 | -2.13 | -2.24 | 0.0299 | AT3G14690 |
| 0.00 | -2.36 | -2.12 | -2.24 | 0.0341 | AT4G35610 |
| 0.00 | -2.11 | -2.37 | -2.24 | 0.0369 | AT3G15500 |
| 0.00 | -2.40 | -2.09 | -2.24 | 0.0439 | AT2G15318 |
| 0.00 | -2.09 | -2.40 | -2.25 | 0.0439 | AT4G27500 |
| 0.00 | -2.11 | -2.39 | -2.25 | 0.0396 | AT2G32540 |

|      |       |       |       |        |           |
|------|-------|-------|-------|--------|-----------|
| 0.00 | -2.26 | -2.24 | -2.25 | 0.0028 | AT3G46690 |
| 0.00 | -2.40 | -2.09 | -2.25 | 0.0439 | AT1G18020 |
| 0.00 | -2.10 | -2.41 | -2.25 | 0.0437 | AT2G28800 |
| 0.00 | -2.24 | -2.27 | -2.25 | 0.0042 | AT1G78290 |
| 0.00 | -2.10 | -2.41 | -2.26 | 0.0437 | AT3G15356 |
| 0.00 | -2.12 | -2.39 | -2.26 | 0.0381 | AT5G56840 |
| 0.00 | -2.26 | -2.25 | -2.26 | 0.0014 | AT4G04510 |
| 0.00 | -2.12 | -2.39 | -2.26 | 0.0381 | AT5G07475 |
| 0.00 | -2.20 | -2.32 | -2.26 | 0.0169 | AT4G23540 |
| 0.00 | -2.11 | -2.41 | -2.26 | 0.0422 | AT5G03310 |
| 0.00 | -2.28 | -2.25 | -2.26 | 0.0042 | AT1G18265 |
| 0.00 | -2.30 | -2.23 | -2.27 | 0.0098 | AT1G10920 |
| 0.00 | -2.29 | -2.25 | -2.27 | 0.0056 | AT5G28690 |
| 0.00 | -2.23 | -2.32 | -2.27 | 0.0126 | AT5G24540 |
| 0.00 | -2.17 | -2.39 | -2.28 | 0.0307 | AT1G05580 |
| 0.00 | -2.39 | -2.17 | -2.28 | 0.0307 | AT2G20670 |
| 0.00 | -2.29 | -2.28 | -2.28 | 0.0014 | AT2G24850 |
| 0.00 | -2.13 | -2.45 | -2.29 | 0.0444 | AT1G66980 |
| 0.00 | -2.28 | -2.31 | -2.30 | 0.0042 | AT4G11070 |
| 0.00 | -2.17 | -2.42 | -2.30 | 0.0346 | AT1G03090 |
| 0.00 | -2.23 | -2.37 | -2.30 | 0.0194 | AT3G54800 |
| 0.00 | -2.20 | -2.40 | -2.30 | 0.0277 | AT1G74250 |
| 0.00 | -2.12 | -2.48 | -2.30 | 0.0497 | AT1G54520 |
| 0.00 | -2.16 | -2.46 | -2.31 | 0.0413 | AT3G07600 |
| 0.00 | -2.18 | -2.45 | -2.32 | 0.0371 | AT1G01490 |
| 0.00 | -2.40 | -2.24 | -2.32 | 0.0219 | AT2G15480 |
| 0.00 | -2.31 | -2.34 | -2.32 | 0.0041 | AT3G21870 |
| 0.00 | -2.38 | -2.27 | -2.32 | 0.0151 | AT4G01700 |
| 0.00 | -2.20 | -2.45 | -2.33 | 0.0342 | AT3G44735 |
| 0.00 | -2.51 | -2.15 | -2.33 | 0.0491 | AT3G62990 |
| 0.00 | -2.30 | -2.37 | -2.33 | 0.0095 | AT2G02720 |
| 0.00 | -2.18 | -2.48 | -2.33 | 0.0409 | AT1G06570 |
| 0.00 | -2.37 | -2.30 | -2.33 | 0.0095 | AT3G55970 |
| 0.00 | -2.39 | -2.28 | -2.34 | 0.0150 | AT3G43250 |
| 0.00 | -2.25 | -2.43 | -2.34 | 0.0245 | AT5G52730 |
| 0.00 | -2.25 | -2.42 | -2.34 | 0.0232 | AT4G30140 |
| 0.00 | -2.31 | -2.37 | -2.34 | 0.0082 | AT1G77330 |
| 0.00 | -2.41 | -2.28 | -2.34 | 0.0176 | AT4G36670 |
| 0.00 | -2.44 | -2.25 | -2.34 | 0.0258 | AT4G32940 |
| 0.00 | -2.31 | -2.37 | -2.34 | 0.0082 | AT3G48450 |
| 0.00 | -2.21 | -2.48 | -2.34 | 0.0366 | AT5G23270 |
| 0.00 | -2.26 | -2.43 | -2.35 | 0.0231 | AT4G15030 |
| 0.00 | -2.24 | -2.46 | -2.35 | 0.0298 | AT3G04700 |
| 0.00 | -2.21 | -2.49 | -2.35 | 0.0379 | AT4G32040 |
| 0.00 | -2.29 | -2.41 | -2.35 | 0.0163 | AT1G30320 |
| 0.00 | -2.34 | -2.38 | -2.36 | 0.0054 | AT1G77145 |
| 0.00 | -2.29 | -2.43 | -2.36 | 0.0189 | AT1G44160 |
| 0.00 | -2.36 | -2.37 | -2.37 | 0.0013 | AT1G79280 |
| 0.00 | -2.27 | -2.46 | -2.37 | 0.0256 | AT3G14630 |
| 0.00 | -2.37 | -2.37 | -2.37 | 0.0000 | AT5G63530 |
| 0.00 | -2.39 | -2.36 | -2.38 | 0.0040 | AT4G09780 |
| 0.00 | -2.24 | -2.52 | -2.38 | 0.0374 | AT1G35490 |
| 0.00 | -2.23 | -2.53 | -2.38 | 0.0401 | AT1G68010 |
| 0.00 | -2.48 | -2.29 | -2.38 | 0.0253 | AT3G05725 |
| 0.00 | -2.43 | -2.33 | -2.38 | 0.0134 | AT5G15110 |
| 0.00 | -2.31 | -2.47 | -2.39 | 0.0213 | AT1G49970 |
| 0.00 | -2.43 | -2.35 | -2.39 | 0.0107 | AT1G67980 |
| 0.00 | -2.52 | -2.27 | -2.39 | 0.0332 | AT5G67080 |
| 0.00 | -2.42 | -2.39 | -2.40 | 0.0040 | AT3G61880 |

|      |       |       |       |        |           |
|------|-------|-------|-------|--------|-----------|
| 0.00 | -2.53 | -2.28 | -2.41 | 0.0331 | AT1G78450 |
| 0.00 | -2.41 | -2.42 | -2.41 | 0.0013 | AT5G67030 |
| 0.00 | -2.35 | -2.48 | -2.41 | 0.0171 | AT1G53980 |
| 0.00 | -2.32 | -2.51 | -2.42 | 0.0250 | AT1G17540 |
| 0.00 | -2.53 | -2.33 | -2.43 | 0.0262 | AT1G76410 |
| 0.00 | -2.36 | -2.51 | -2.43 | 0.0196 | AT1G20470 |
| 0.00 | -2.32 | -2.55 | -2.44 | 0.0300 | AT5G43180 |
| 0.00 | -2.27 | -2.62 | -2.45 | 0.0455 | AT2G41870 |
| 0.00 | -2.32 | -2.58 | -2.45 | 0.0337 | AT1G65500 |
| 0.00 | -2.26 | -2.64 | -2.45 | 0.0493 | AT4G00940 |
| 0.00 | -2.42 | -2.47 | -2.45 | 0.0065 | AT1G26380 |
| 0.00 | -2.40 | -2.50 | -2.45 | 0.0130 | AT4G15130 |
| 0.00 | -2.38 | -2.52 | -2.45 | 0.0182 | AT3G28540 |
| 0.00 | -2.32 | -2.58 | -2.45 | 0.0337 | AT3G45300 |
| 0.00 | -2.39 | -2.52 | -2.45 | 0.0169 | AT1G10480 |
| 0.00 | -2.51 | -2.40 | -2.46 | 0.0143 | AT1G54410 |
| 0.00 | -2.55 | -2.37 | -2.46 | 0.0233 | AT1G07340 |
| 0.00 | -2.42 | -2.50 | -2.46 | 0.0104 | AT5G54170 |
| 0.00 | -2.43 | -2.49 | -2.46 | 0.0078 | AT1G09415 |
| 0.00 | -2.39 | -2.54 | -2.46 | 0.0194 | AT1G11070 |
| 0.00 | -2.38 | -2.56 | -2.47 | 0.0232 | AT3G54150 |
| 0.00 | -2.49 | -2.45 | -2.47 | 0.0052 | AT5G56550 |
| 0.00 | -2.36 | -2.60 | -2.48 | 0.0308 | AT2G28180 |
| 0.00 | -2.62 | -2.34 | -2.48 | 0.0359 | AT1G09080 |
| 0.00 | -2.39 | -2.59 | -2.49 | 0.0256 | AT1G77930 |
| 0.00 | -2.49 | -2.49 | -2.49 | 0.0000 | AT5G52740 |
| 0.00 | -2.55 | -2.43 | -2.49 | 0.0153 | AT4G37820 |
| 0.00 | -2.45 | -2.54 | -2.50 | 0.0115 | AT3G26440 |
| 0.00 | -2.34 | -2.66 | -2.50 | 0.0407 | AT1G33612 |
| 0.00 | -2.61 | -2.39 | -2.50 | 0.0280 | AT2G15029 |
| 0.00 | -2.49 | -2.51 | -2.50 | 0.0025 | AT2G24990 |
| 0.00 | -2.55 | -2.46 | -2.50 | 0.0114 | AT1G61820 |
| 0.00 | -2.37 | -2.64 | -2.50 | 0.0343 | AT2G01100 |
| 0.00 | -2.40 | -2.62 | -2.51 | 0.0279 | AT2G15080 |
| 0.00 | -2.70 | -2.33 | -2.51 | 0.0467 | AT4G16630 |
| 0.00 | -2.44 | -2.58 | -2.51 | 0.0177 | AT5G48570 |
| 0.00 | -2.57 | -2.46 | -2.52 | 0.0139 | AT2G02710 |
| 0.00 | -2.37 | -2.66 | -2.52 | 0.0367 | AT3G17980 |
| 0.00 | -2.33 | -2.71 | -2.52 | 0.0479 | AT1G77810 |
| 0.00 | -2.42 | -2.62 | -2.52 | 0.0252 | AT1G66852 |
| 0.00 | -2.33 | -2.71 | -2.52 | 0.0479 | AT4G37560 |
| 0.00 | -2.37 | -2.68 | -2.52 | 0.0390 | AT4G30250 |
| 0.00 | -2.46 | -2.59 | -2.52 | 0.0164 | AT1G79860 |
| 0.00 | -2.69 | -2.38 | -2.54 | 0.0389 | AT4G10500 |
| 0.00 | -2.74 | -2.35 | -2.54 | 0.0487 | AT1G18990 |
| 0.00 | -2.54 | -2.55 | -2.55 | 0.0013 | AT3G10120 |
| 0.00 | -2.40 | -2.69 | -2.55 | 0.0362 | AT3G45710 |
| 0.00 | -2.50 | -2.62 | -2.56 | 0.0149 | AT5G63970 |
| 0.00 | -2.37 | -2.77 | -2.57 | 0.0494 | AT1G17820 |
| 0.00 | -2.57 | -2.59 | -2.58 | 0.0025 | AT1G20440 |
| 0.00 | -2.61 | -2.55 | -2.58 | 0.0074 | AT3G10790 |
| 0.00 | -2.48 | -2.69 | -2.58 | 0.0258 | AT2G05850 |
| 0.00 | -2.54 | -2.63 | -2.59 | 0.0111 | AT1G16730 |
| 0.00 | -2.68 | -2.50 | -2.59 | 0.0221 | AT3G21710 |
| 0.00 | -2.73 | -2.46 | -2.59 | 0.0331 | AT4G18340 |
| 0.00 | -2.42 | -2.76 | -2.59 | 0.0417 | AT3G28930 |
| 0.00 | -2.64 | -2.56 | -2.60 | 0.0098 | AT3G26830 |
| 0.00 | -2.45 | -2.75 | -2.60 | 0.0367 | AT1G79680 |
| 0.00 | -2.52 | -2.68 | -2.60 | 0.0196 | AT4G01895 |

|      |       |       |       |        |           |
|------|-------|-------|-------|--------|-----------|
| 0.00 | -2.64 | -2.56 | -2.60 | 0.0098 | AT1G47890 |
| 0.00 | -2.53 | -2.68 | -2.60 | 0.0183 | AT4G09300 |
| 0.00 | -2.74 | -2.48 | -2.61 | 0.0317 | AT5G57520 |
| 0.00 | -2.62 | -2.61 | -2.62 | 0.0012 | AT4G31870 |
| 0.00 | -2.60 | -2.64 | -2.62 | 0.0049 | AT3G52010 |
| 0.00 | -2.53 | -2.71 | -2.62 | 0.0219 | AT3G45160 |
| 0.00 | -2.63 | -2.63 | -2.63 | 0.0000 | AT3G15840 |
| 0.00 | -2.68 | -2.57 | -2.63 | 0.0133 | AT5G45090 |
| 0.00 | -2.65 | -2.63 | -2.64 | 0.0024 | AT2G31380 |
| 0.00 | -2.52 | -2.77 | -2.64 | 0.0301 | AT1G80810 |
| 0.00 | -2.49 | -2.83 | -2.66 | 0.0406 | AT5G48140 |
| 0.00 | -2.80 | -2.52 | -2.66 | 0.0335 | AT1G52580 |
| 0.00 | -2.56 | -2.78 | -2.67 | 0.0262 | AT2G43850 |
| 0.00 | -2.66 | -2.70 | -2.68 | 0.0048 | AT2G04038 |
| 0.00 | -2.59 | -2.78 | -2.68 | 0.0225 | AT4G27300 |
| 0.00 | -2.62 | -2.75 | -2.69 | 0.0154 | AT4G13040 |
| 0.00 | -2.58 | -2.80 | -2.69 | 0.0260 | AT5G53320 |
| 0.00 | -2.66 | -2.74 | -2.70 | 0.0094 | AT4G06746 |
| 0.00 | -2.84 | -2.56 | -2.70 | 0.0330 | AT1G32510 |
| 0.00 | -2.68 | -2.73 | -2.70 | 0.0059 | AT2G19050 |
| 0.00 | -2.51 | -2.91 | -2.71 | 0.0469 | AT1G72540 |
| 0.00 | -2.63 | -2.81 | -2.72 | 0.0211 | AT3G05900 |
| 0.00 | -2.78 | -2.66 | -2.72 | 0.0140 | AT2G26975 |
| 0.00 | -2.55 | -2.91 | -2.73 | 0.0419 | AT3G20530 |
| 0.00 | -2.86 | -2.63 | -2.75 | 0.0267 | AT2G27285 |
| 0.00 | -2.69 | -2.80 | -2.75 | 0.0128 | AT1G66600 |
| 0.00 | -2.68 | -2.84 | -2.76 | 0.0184 | AT3G17510 |
| 0.00 | -2.59 | -2.95 | -2.77 | 0.0413 | AT2G05540 |
| 0.00 | -2.68 | -2.90 | -2.79 | 0.0251 | AT5G13080 |
| 0.00 | -2.66 | -2.96 | -2.81 | 0.0340 | AT1G60730 |
| 0.00 | -2.65 | -2.98 | -2.82 | 0.0373 | AT1G75040 |
| 0.00 | -2.81 | -2.83 | -2.82 | 0.0023 | AT4G04500 |
| 0.00 | -2.64 | -3.01 | -2.83 | 0.0416 | AT4G37925 |
| 0.00 | -2.73 | -2.93 | -2.83 | 0.0225 | AT3G60300 |
| 0.00 | -2.76 | -2.90 | -2.83 | 0.0157 | AT5G15140 |
| 0.00 | -2.77 | -2.92 | -2.84 | 0.0168 | AT2G30770 |
| 0.00 | -2.71 | -2.98 | -2.85 | 0.0302 | AT1G62630 |
| 0.00 | -2.79 | -2.92 | -2.85 | 0.0145 | AT1G20120 |
| 0.00 | -2.94 | -2.79 | -2.86 | 0.0167 | AT5G64110 |
| 0.00 | -2.98 | -2.75 | -2.86 | 0.0255 | AT5G58784 |
| 0.00 | -2.95 | -2.78 | -2.86 | 0.0189 | AT2G34610 |
| 0.00 | -2.79 | -2.95 | -2.87 | 0.0177 | AT3G49340 |
| 0.00 | -2.69 | -3.06 | -2.87 | 0.0409 | AT3G51880 |
| 0.00 | -2.75 | -3.02 | -2.89 | 0.0298 | AT5G07080 |
| 0.00 | -2.76 | -3.01 | -2.89 | 0.0276 | AT1G08450 |
| 0.00 | -2.72 | -3.06 | -2.89 | 0.0374 | AT3G49601 |
| 0.00 | -2.88 | -2.91 | -2.90 | 0.0033 | AT1G43160 |
| 0.00 | -3.08 | -2.73 | -2.91 | 0.0383 | AT2G07140 |
| 0.00 | -2.89 | -2.93 | -2.91 | 0.0044 | AT1G28190 |
| 0.00 | -2.91 | -2.91 | -2.91 | 0.0000 | AT5G55490 |
| 0.00 | -2.87 | -2.96 | -2.91 | 0.0098 | AT2G07040 |
| 0.00 | -2.70 | -3.15 | -2.92 | 0.0489 | AT1G02610 |
| 0.00 | -2.91 | -2.93 | -2.92 | 0.0022 | AT2G30840 |
| 0.00 | -2.71 | -3.14 | -2.93 | 0.0467 | AT3G02810 |
| 0.00 | -2.96 | -2.91 | -2.94 | 0.0054 | AT2G26410 |
| 0.00 | -2.84 | -3.04 | -2.94 | 0.0216 | AT5G12000 |
| 0.00 | -2.93 | -2.97 | -2.95 | 0.0043 | AT5G59780 |
| 0.00 | -3.10 | -2.81 | -2.96 | 0.0312 | AT4G13450 |
| 0.00 | -2.90 | -3.01 | -2.96 | 0.0118 | AT1G66700 |

|      |       |       |       |        |           |
|------|-------|-------|-------|--------|-----------|
| 0.00 | -2.88 | -3.05 | -2.96 | 0.0182 | AT3G57950 |
| 0.00 | -2.79 | -3.15 | -2.97 | 0.0385 | AT3G16530 |
| 0.00 | -2.89 | -3.04 | -2.97 | 0.0161 | AT5G40000 |
| 0.00 | -2.82 | -3.14 | -2.98 | 0.0341 | AT5G03270 |
| 0.00 | -3.10 | -2.88 | -2.99 | 0.0234 | AT2G29460 |
| 0.00 | -3.22 | -2.77 | -2.99 | 0.0477 | AT2G39410 |
| 0.00 | -3.13 | -2.89 | -3.01 | 0.0254 | AT1G67230 |
| 0.00 | -3.01 | -3.02 | -3.02 | 0.0011 | AT5G07100 |
| 0.00 | -2.91 | -3.12 | -3.02 | 0.0222 | AT3G50360 |
| 0.00 | -2.91 | -3.13 | -3.02 | 0.0232 | AT3G07820 |
| 0.00 | -2.94 | -3.11 | -3.03 | 0.0179 | AT1G67000 |
| 0.00 | -3.20 | -2.86 | -3.03 | 0.0357 | AT4G13890 |
| 0.00 | -2.87 | -3.20 | -3.04 | 0.0346 | AT1G60240 |
| 0.00 | -2.85 | -3.23 | -3.04 | 0.0397 | AT5G61590 |
| 0.00 | -3.06 | -3.07 | -3.06 | 0.0010 | AT5G52390 |
| 0.00 | -3.16 | -3.00 | -3.08 | 0.0165 | AT3G14650 |
| 0.00 | -3.03 | -3.13 | -3.08 | 0.0103 | AT3G09940 |
| 0.00 | -3.24 | -2.92 | -3.08 | 0.0330 | AT3G44300 |
| 0.00 | -3.16 | -3.01 | -3.08 | 0.0155 | AT4G08780 |
| 0.00 | -3.04 | -3.14 | -3.09 | 0.0103 | AT3G49620 |
| 0.00 | -3.20 | -2.99 | -3.10 | 0.0216 | AT2G39030 |
| 0.00 | -3.06 | -3.14 | -3.10 | 0.0082 | AT4G02650 |
| 0.00 | -2.88 | -3.32 | -3.10 | 0.0451 | AT4G12830 |
| 0.00 | -3.12 | -3.09 | -3.10 | 0.0031 | AT5G64840 |
| 0.00 | -3.17 | -3.10 | -3.14 | 0.0071 | AT3G62230 |
| 0.00 | -3.35 | -2.94 | -3.15 | 0.0414 | AT4G05030 |
| 0.00 | -3.37 | -2.94 | -3.16 | 0.0433 | AT3G53980 |
| 0.00 | -3.25 | -3.07 | -3.16 | 0.0181 | AT1G03590 |
| 0.00 | -3.01 | -3.33 | -3.17 | 0.0321 | AT2G47810 |
| 0.00 | -3.08 | -3.26 | -3.17 | 0.0181 | AT3G45130 |
| 0.00 | -3.28 | -3.06 | -3.17 | 0.0221 | AT3G04360 |
| 0.00 | -3.14 | -3.23 | -3.18 | 0.0090 | AT1G01680 |
| 0.00 | -3.29 | -3.09 | -3.19 | 0.0200 | AT3G13610 |
| 0.00 | -3.02 | -3.39 | -3.20 | 0.0367 | AT2G01530 |
| 0.00 | -3.05 | -3.36 | -3.21 | 0.0308 | AT3G14640 |
| 0.00 | -3.08 | -3.35 | -3.22 | 0.0267 | AT2G30790 |
| 0.00 | -3.09 | -3.37 | -3.23 | 0.0276 | AT5G51680 |
| 0.00 | -3.25 | -3.25 | -3.25 | 0.0000 | AT1G06160 |
| 0.00 | -3.38 | -3.12 | -3.25 | 0.0255 | AT2G17890 |
| 0.00 | -3.22 | -3.33 | -3.27 | 0.0107 | AT3G07780 |
| 0.00 | -3.20 | -3.38 | -3.29 | 0.0174 | AT1G49270 |
| 0.00 | -3.30 | -3.30 | -3.30 | 0.0000 | AT4G37150 |
| 0.00 | -3.31 | -3.31 | -3.31 | 0.0000 | AT4G25000 |
| 0.00 | -3.32 | -3.32 | -3.32 | 0.0000 | AT1G20920 |
| 0.00 | -3.18 | -3.56 | -3.37 | 0.0359 | AT5G53020 |
| 0.00 | -3.13 | -3.65 | -3.39 | 0.0487 | AT1G49520 |
| 0.00 | -3.29 | -3.54 | -3.42 | 0.0233 | AT5G44400 |
| 0.00 | -3.17 | -3.67 | -3.42 | 0.0465 | AT3G28580 |
| 0.00 | -3.70 | -3.18 | -3.44 | 0.0480 | AT2G23620 |
| 0.00 | -3.47 | -3.48 | -3.48 | 0.0009 | AT1G13650 |
| 0.00 | -3.58 | -3.37 | -3.48 | 0.0192 | AT2G36450 |
| 0.00 | -3.26 | -3.71 | -3.48 | 0.0410 | AT4G21920 |
| 0.00 | -3.61 | -3.37 | -3.49 | 0.0219 | AT4G39675 |
| 0.00 | -3.44 | -3.55 | -3.49 | 0.0100 | AT4G20860 |
| 0.00 | -3.35 | -3.65 | -3.50 | 0.0273 | AT2G22510 |
| 0.00 | -3.60 | -3.46 | -3.53 | 0.0126 | AT5G16500 |
| 0.00 | -3.60 | -3.47 | -3.53 | 0.0117 | AT5G41440 |
| 0.00 | -3.72 | -3.38 | -3.55 | 0.0305 | AT4G37710 |
| 0.00 | -3.61 | -3.51 | -3.56 | 0.0089 | AT5G44380 |



|      |       |       |       |        |           |
|------|-------|-------|-------|--------|-----------|
| 0.00 | -3.71 | -3.49 | -3.60 | 0.0194 | AT4G21200 |
| 0.00 | -3.67 | -3.80 | -3.73 | 0.0111 | AT1G74590 |
| 0.00 | -3.71 | -3.77 | -3.74 | 0.0051 | AT2G44990 |
| 0.00 | -3.99 | -3.53 | -3.76 | 0.0389 | AT1G31050 |
| 0.00 | -3.56 | -3.99 | -3.78 | 0.0362 | AT4G19370 |
| 0.00 | -3.59 | -4.00 | -3.79 | 0.0344 | AT1G52810 |
| 0.00 | -3.71 | -3.88 | -3.79 | 0.0143 | AT4G25434 |
| 0.00 | -3.94 | -3.88 | -3.91 | 0.0049 | AT1G53990 |
| 0.00 | -3.92 | -3.91 | -3.92 | 0.0008 | AT1G19530 |
| 0.00 | -3.97 | -3.88 | -3.93 | 0.0073 | AT5G06420 |
| 0.00 | -4.17 | -3.70 | -3.94 | 0.0380 | AT1G20160 |
| 0.00 | -3.78 | -4.10 | -3.94 | 0.0258 | AT2G21730 |
| 0.00 | -4.12 | -3.84 | -3.98 | 0.0224 | AT2G38390 |
| 0.00 | -4.16 | -3.84 | -4.00 | 0.0255 | AT5G22555 |
| 0.00 | -4.20 | -3.88 | -4.04 | 0.0252 | AT2G38380 |
| 0.00 | -4.10 | -3.99 | -4.05 | 0.0087 | AT4G32810 |
| 0.00 | -3.91 | -4.34 | -4.12 | 0.0332 | AT4G36430 |
| 0.00 | -4.11 | -4.31 | -4.21 | 0.0151 | AT1G61810 |
| 0.00 | -4.00 | -4.43 | -4.21 | 0.0324 | AT1G64160 |
| 0.00 | -3.92 | -4.54 | -4.23 | 0.0466 | AT1G49210 |
| 0.00 | -4.32 | -4.30 | -4.31 | 0.0015 | AT5G39100 |
| 0.00 | -4.38 | -4.33 | -4.36 | 0.0037 | AT4G38080 |
| 0.00 | -4.07 | -4.71 | -4.39 | 0.0463 | AT5G42490 |
| 0.00 | -4.34 | -4.62 | -4.48 | 0.0199 | AT2G18370 |
| 0.00 | -4.65 | -4.55 | -4.60 | 0.0069 | AT3G05950 |
| 0.00 | -5.11 | -4.41 | -4.76 | 0.0467 | AT2G44370 |
| 0.00 | -4.74 | -4.88 | -4.81 | 0.0093 | AT4G01985 |
| 0.00 | -4.72 | -4.93 | -4.82 | 0.0139 | AT5G37690 |
| 0.00 | -4.58 | -5.11 | -4.85 | 0.0348 | AT5G65600 |
| 0.00 | -4.73 | -5.12 | -4.93 | 0.0252 | AT4G17220 |
| 0.00 | -4.94 | -4.97 | -4.96 | 0.0019 | AT5G09480 |
| 0.00 | -5.03 | -5.24 | -5.13 | 0.0130 | AT5G40990 |
| 0.00 | -5.27 | -5.58 | -5.42 | 0.0182 | AT2G38600 |
| 0.00 | -5.56 | -5.45 | -5.51 | 0.0064 | AT5G58860 |
| 0.00 | -5.74 | -6.18 | -5.96 | 0.0235 | AT1G60470 |

**Supplementary material 4: List of up- and down-regulated genes (HE-6D-WL vs HE) with their normalized fold induction and adjusted p value**

| Normalized Fold OE | Fold OE-6D-WL 1 | Fold OE-6D-WL 2 | Normalized Fold OE-6D-WL | Adjusted P value | Gene ID   |
|--------------------|-----------------|-----------------|--------------------------|------------------|-----------|
| 0.00               | 7.16            | 7.19            | 7.17                     | 0.0013           | AT5G53680 |
| 0.00               | 7.14            | 6.75            | 6.95                     | 0.0179           | AT4G21830 |
| 0.00               | 6.46            | 6.52            | 6.49                     | 0.0029           | AT2G45580 |
| 0.00               | 5.86            | 6.08            | 5.97                     | 0.0117           | AT3G63380 |
| 0.00               | 5.80            | 5.99            | 5.90                     | 0.0103           | AT3G11430 |
| 0.00               | 5.90            | 5.78            | 5.84                     | 0.0065           | AT1G10585 |
| 0.00               | 5.92            | 5.76            | 5.84                     | 0.0087           | AT1G35310 |
| 0.00               | 5.76            | 5.50            | 5.63                     | 0.0147           | AT2G39030 |
| 0.00               | 5.59            | 5.37            | 5.48                     | 0.0128           | AT1G48720 |
| 0.00               | 5.62            | 5.33            | 5.48                     | 0.0169           | AT5G38910 |
| 0.00               | 5.41            | 5.17            | 5.29                     | 0.0144           | AT5G23020 |
| 0.00               | 5.36            | 5.19            | 5.28                     | 0.0103           | AT2G31230 |
| 0.00               | 5.00            | 5.00            | 5.00                     | 0.0000           | AT2G38240 |
| 0.00               | 4.68            | 5.24            | 4.96                     | 0.0359           | AT3G28810 |
| 0.00               | 4.93            | 4.94            | 4.93                     | 0.0006           | AT5G10040 |
| 0.00               | 4.87            | 4.92            | 4.89                     | 0.0033           | AT5G59720 |
| 0.00               | 4.84            | 4.93            | 4.88                     | 0.0059           | AT4G10250 |
| 0.00               | 4.90            | 4.73            | 4.82                     | 0.0112           | AT1G05700 |
| 0.00               | 4.72            | 4.81            | 4.77                     | 0.0060           | AT5G10625 |
| 0.00               | 4.61            | 4.89            | 4.75                     | 0.0188           | AT5G65600 |
| 0.00               | 4.68            | 4.69            | 4.69                     | 0.0007           | AT3G13229 |
| 0.00               | 4.47            | 4.77            | 4.62                     | 0.0207           | AT1G60470 |
| 0.00               | 4.56            | 4.59            | 4.57                     | 0.0021           | AT4G37710 |
| 0.00               | 4.21            | 4.81            | 4.51                     | 0.0423           | AT4G18450 |
| 0.00               | 4.54            | 4.46            | 4.50                     | 0.0057           | AT1G73260 |
| 0.00               | 4.22            | 4.76            | 4.49                     | 0.0382           | AT4G13450 |
| 0.00               | 4.64            | 4.33            | 4.49                     | 0.0220           | AT1G66120 |
| 0.00               | 4.24            | 4.72            | 4.48                     | 0.0341           | AT1G28305 |
| 0.00               | 4.41            | 4.30            | 4.35                     | 0.0080           | AT1G43160 |
| 0.00               | 4.57            | 4.12            | 4.34                     | 0.0329           | AT2G10970 |
| 0.00               | 4.01            | 4.66            | 4.34                     | 0.0476           | AT4G23200 |
| 0.00               | 4.56            | 4.08            | 4.32                     | 0.0353           | AT3G03520 |
| 0.00               | 3.96            | 4.60            | 4.28                     | 0.0475           | AT1G26250 |
| 0.00               | 4.24            | 4.31            | 4.27                     | 0.0052           | AT2G39518 |
| 0.00               | 4.39            | 4.12            | 4.26                     | 0.0202           | AT1G18860 |
| 0.00               | 4.19            | 4.32            | 4.25                     | 0.0097           | AT2G38940 |
| 0.00               | 4.29            | 4.17            | 4.23                     | 0.0090           | AT5G43580 |
| 0.00               | 4.12            | 4.30            | 4.21                     | 0.0136           | AT1G01453 |
| 0.00               | 4.08            | 4.32            | 4.20                     | 0.0182           | AT4G11650 |
| 0.00               | 4.44            | 3.95            | 4.20                     | 0.0371           | AT1G12940 |

|      |      |      |      |        |           |
|------|------|------|------|--------|-----------|
| 0.00 | 3.85 | 4.39 | 4.12 | 0.0417 | AT2G47950 |
| 0.00 | 4.23 | 3.98 | 4.10 | 0.0194 | AT5G39310 |
| 0.00 | 3.91 | 4.27 | 4.09 | 0.0280 | AT2G15780 |
| 0.00 | 4.02 | 4.09 | 4.05 | 0.0055 | AT5G07420 |
| 0.00 | 4.15 | 3.93 | 4.04 | 0.0173 | AT5G13080 |
| 0.00 | 3.91 | 4.16 | 4.03 | 0.0197 | AT1G64200 |
| 0.00 | 4.11 | 3.92 | 4.01 | 0.0151 | AT2G34610 |
| 0.00 | 3.83 | 4.20 | 4.01 | 0.0293 | AT2G19000 |
| 0.00 | 4.16 | 3.83 | 4.00 | 0.0263 | AT3G25240 |
| 0.00 | 3.79 | 4.18 | 3.99 | 0.0311 | AT4G28350 |
| 0.00 | 3.73 | 4.22 | 3.98 | 0.0392 | AT3G22650 |
| 0.00 | 3.82 | 4.13 | 3.98 | 0.0248 | AT4G20860 |
| 0.00 | 4.17 | 3.75 | 3.96 | 0.0337 | AT3G12230 |
| 0.00 | 3.88 | 3.96 | 3.92 | 0.0065 | AT1G68620 |
| 0.00 | 4.15 | 3.68 | 3.92 | 0.0382 | AT1G66550 |
| 0.00 | 3.92 | 3.91 | 3.91 | 0.0008 | AT2G15760 |
| 0.00 | 3.73 | 4.09 | 3.91 | 0.0293 | AT2G43386 |
| 0.00 | 4.05 | 3.76 | 3.91 | 0.0236 | AT1G62760 |
| 0.00 | 3.70 | 4.05 | 3.88 | 0.0287 | AT2G16730 |
| 0.00 | 3.82 | 3.93 | 3.88 | 0.0090 | AT4G04540 |
| 0.00 | 3.74 | 4.00 | 3.87 | 0.0214 | AT5G41590 |
| 0.00 | 3.89 | 3.84 | 3.86 | 0.0041 | AT1G32350 |
| 0.00 | 4.03 | 3.66 | 3.85 | 0.0306 | AT3G59900 |
| 0.00 | 3.83 | 3.85 | 3.84 | 0.0017 | AT5G06740 |
| 0.00 | 3.75 | 3.92 | 3.84 | 0.0141 | AT5G56640 |
| 0.00 | 3.55 | 4.10 | 3.83 | 0.0457 | AT1G60240 |
| 0.00 | 3.61 | 4.05 | 3.83 | 0.0365 | AT1G76640 |
| 0.00 | 3.73 | 3.89 | 3.81 | 0.0134 | AT3G53600 |
| 0.00 | 3.57 | 4.04 | 3.81 | 0.0393 | AT1G70540 |
| 0.00 | 3.62 | 3.98 | 3.80 | 0.0301 | AT4G06746 |
| 0.00 | 3.63 | 3.96 | 3.79 | 0.0277 | AT3G52600 |
| 0.00 | 3.71 | 3.87 | 3.79 | 0.0134 | AT2G29470 |
| 0.00 | 3.65 | 3.91 | 3.78 | 0.0219 | AT5G62750 |
| 0.00 | 3.89 | 3.66 | 3.78 | 0.0194 | AT2G47340 |
| 0.00 | 3.77 | 3.76 | 3.77 | 0.0008 | AT1G28190 |
| 0.00 | 3.52 | 4.01 | 3.76 | 0.0414 | AT2G47030 |
| 0.00 | 3.70 | 3.78 | 3.74 | 0.0068 | AT2G28210 |
| 0.00 | 4.03 | 3.45 | 3.74 | 0.0493 | AT4G18395 |
| 0.00 | 3.49 | 3.97 | 3.73 | 0.0409 | AT5G50830 |
| 0.00 | 3.61 | 3.76 | 3.68 | 0.0130 | AT5G15140 |
| 0.00 | 3.80 | 3.56 | 3.68 | 0.0208 | AT1G11770 |
| 0.00 | 3.86 | 3.49 | 3.67 | 0.0320 | AT1G52580 |
| 0.00 | 3.79 | 3.55 | 3.67 | 0.0208 | AT1G71520 |
| 0.00 | 3.74 | 3.57 | 3.66 | 0.0148 | AT1G31885 |
| 0.00 | 3.42 | 3.88 | 3.65 | 0.0401 | AT5G58170 |
| 0.00 | 3.84 | 3.44 | 3.64 | 0.0349 | AT3G10460 |

|      |      |      |      |        |           |
|------|------|------|------|--------|-----------|
| 0.00 | 3.82 | 3.45 | 3.63 | 0.0324 | AT2G19010 |
| 0.00 | 3.77 | 3.49 | 3.63 | 0.0245 | AT1G68150 |
| 0.00 | 3.52 | 3.74 | 3.63 | 0.0193 | AT5G27870 |
| 0.00 | 3.60 | 3.66 | 3.63 | 0.0053 | AT5G48140 |
| 0.00 | 3.45 | 3.81 | 3.63 | 0.0315 | AT5G66985 |
| 0.00 | 3.84 | 3.39 | 3.61 | 0.0396 | AT5G54300 |
| 0.00 | 3.79 | 3.43 | 3.61 | 0.0317 | AT2G44560 |
| 0.00 | 3.48 | 3.73 | 3.60 | 0.0221 | AT3G17980 |
| 0.00 | 3.85 | 3.36 | 3.60 | 0.0432 | AT5G51890 |
| 0.00 | 3.52 | 3.68 | 3.60 | 0.0141 | AT1G16030 |
| 0.00 | 3.51 | 3.68 | 3.59 | 0.0150 | AT5G42490 |
| 0.00 | 3.55 | 3.64 | 3.59 | 0.0080 | AT3G46520 |
| 0.00 | 3.67 | 3.50 | 3.59 | 0.0151 | AT3G28750 |
| 0.00 | 3.50 | 3.66 | 3.58 | 0.0142 | AT1G44414 |
| 0.00 | 3.44 | 3.71 | 3.57 | 0.0240 | AT4G33860 |
| 0.00 | 3.46 | 3.67 | 3.57 | 0.0187 | AT3G22510 |
| 0.00 | 3.59 | 3.54 | 3.57 | 0.0045 | AT1G11765 |
| 0.00 | 3.46 | 3.67 | 3.57 | 0.0187 | AT1G50610 |
| 0.00 | 3.35 | 3.75 | 3.55 | 0.0358 | AT2G17900 |
| 0.00 | 3.44 | 3.66 | 3.55 | 0.0197 | AT4G24640 |
| 0.00 | 3.47 | 3.63 | 3.55 | 0.0143 | AT3G05930 |
| 0.00 | 3.47 | 3.63 | 3.55 | 0.0143 | AT1G52560 |
| 0.00 | 3.72 | 3.35 | 3.54 | 0.0333 | AT3G04360 |
| 0.00 | 3.47 | 3.59 | 3.53 | 0.0108 | AT2G19050 |
| 0.00 | 3.43 | 3.63 | 3.53 | 0.0180 | AT2G28180 |
| 0.00 | 3.58 | 3.46 | 3.52 | 0.0109 | AT3G21570 |
| 0.00 | 3.61 | 3.39 | 3.50 | 0.0200 | AT2G17740 |
| 0.00 | 3.31 | 3.68 | 3.49 | 0.0337 | AT5G23270 |
| 0.00 | 3.43 | 3.55 | 3.49 | 0.0109 | AT1G27020 |
| 0.00 | 3.38 | 3.60 | 3.49 | 0.0201 | AT2G46360 |
| 0.00 | 3.43 | 3.55 | 3.49 | 0.0109 | AT5G04180 |
| 0.00 | 3.40 | 3.58 | 3.49 | 0.0164 | AT3G25165 |
| 0.00 | 3.36 | 3.60 | 3.48 | 0.0219 | AT4G37990 |
| 0.00 | 3.42 | 3.53 | 3.48 | 0.0101 | AT1G19500 |
| 0.00 | 3.30 | 3.65 | 3.48 | 0.0320 | AT1G51250 |
| 0.00 | 3.37 | 3.57 | 3.47 | 0.0183 | AT1G11250 |
| 0.00 | 3.39 | 3.52 | 3.45 | 0.0120 | AT5G15110 |
| 0.00 | 3.23 | 3.68 | 3.45 | 0.0414 | AT5G60740 |
| 0.00 | 3.39 | 3.51 | 3.45 | 0.0111 | AT4G27670 |
| 0.00 | 3.44 | 3.45 | 3.45 | 0.0009 | AT1G10370 |
| 0.00 | 3.34 | 3.55 | 3.44 | 0.0194 | AT3G01230 |
| 0.00 | 3.49 | 3.40 | 3.44 | 0.0083 | AT4G09780 |
| 0.00 | 3.37 | 3.51 | 3.44 | 0.0130 | AT3G56180 |
| 0.00 | 3.23 | 3.64 | 3.44 | 0.0379 | AT2G28640 |
| 0.00 | 3.24 | 3.63 | 3.44 | 0.0361 | AT4G15610 |
| 0.00 | 3.70 | 3.17 | 3.43 | 0.0490 | AT3G06830 |

|      |      |      |      |        |           |
|------|------|------|------|--------|-----------|
| 0.00 | 3.44 | 3.43 | 3.43 | 0.0009 | AT3G09940 |
| 0.00 | 3.53 | 3.33 | 3.43 | 0.0186 | AT5G26692 |
| 0.00 | 3.54 | 3.32 | 3.43 | 0.0204 | AT4G18980 |
| 0.00 | 3.25 | 3.61 | 3.43 | 0.0334 | AT4G30140 |
| 0.00 | 3.24 | 3.62 | 3.43 | 0.0352 | AT2G26850 |
| 0.00 | 3.20 | 3.63 | 3.42 | 0.0400 | AT4G29930 |
| 0.00 | 3.57 | 3.24 | 3.40 | 0.0308 | AT5G10500 |
| 0.00 | 3.38 | 3.42 | 3.40 | 0.0037 | AT3G18220 |
| 0.00 | 3.32 | 3.47 | 3.40 | 0.0141 | AT3G11180 |
| 0.00 | 3.15 | 3.63 | 3.39 | 0.0450 | AT1G54070 |
| 0.00 | 3.19 | 3.58 | 3.39 | 0.0366 | AT4G21920 |
| 0.00 | 3.17 | 3.60 | 3.39 | 0.0404 | AT2G43230 |
| 0.00 | 3.26 | 3.50 | 3.38 | 0.0226 | AT1G75930 |
| 0.00 | 3.13 | 3.62 | 3.37 | 0.0461 | AT4G12400 |
| 0.00 | 3.16 | 3.58 | 3.37 | 0.0396 | AT2G31430 |
| 0.00 | 3.22 | 3.52 | 3.37 | 0.0283 | AT1G55560 |
| 0.00 | 3.42 | 3.32 | 3.37 | 0.0094 | AT2G21990 |
| 0.00 | 3.26 | 3.48 | 3.37 | 0.0208 | AT3G54240 |
| 0.00 | 3.50 | 3.23 | 3.37 | 0.0255 | AT5G52720 |
| 0.00 | 3.36 | 3.36 | 3.36 | 0.0000 | AT2G26450 |
| 0.00 | 3.30 | 3.42 | 3.36 | 0.0114 | AT3G53150 |
| 0.00 | 3.43 | 3.28 | 3.36 | 0.0142 | AT2G04220 |
| 0.00 | 3.34 | 3.37 | 3.35 | 0.0028 | AT3G36659 |
| 0.00 | 3.35 | 3.34 | 3.35 | 0.0010 | AT2G44540 |
| 0.00 | 3.19 | 3.50 | 3.35 | 0.0295 | AT3G54800 |
| 0.00 | 3.52 | 3.16 | 3.34 | 0.0343 | AT2G02140 |
| 0.00 | 3.32 | 3.35 | 3.33 | 0.0029 | AT5G25430 |
| 0.00 | 3.31 | 3.34 | 3.32 | 0.0029 | AT2G24850 |
| 0.00 | 3.46 | 3.19 | 3.32 | 0.0258 | AT2G16586 |
| 0.00 | 3.07 | 3.56 | 3.32 | 0.0470 | AT5G02110 |
| 0.00 | 3.52 | 3.11 | 3.31 | 0.0393 | AT4G29740 |
| 0.00 | 3.33 | 3.29 | 3.31 | 0.0038 | AT1G16420 |
| 0.00 | 3.05 | 3.57 | 3.31 | 0.0499 | AT3G19615 |
| 0.00 | 3.26 | 3.35 | 3.31 | 0.0087 | AT3G26860 |
| 0.00 | 3.28 | 3.33 | 3.31 | 0.0048 | AT2G47180 |
| 0.00 | 3.27 | 3.34 | 3.30 | 0.0067 | AT5G39050 |
| 0.00 | 3.34 | 3.25 | 3.30 | 0.0087 | AT4G02250 |
| 0.00 | 3.35 | 3.24 | 3.30 | 0.0106 | AT2G33710 |
| 0.00 | 3.16 | 3.42 | 3.29 | 0.0251 | AT3G21230 |
| 0.00 | 3.41 | 3.18 | 3.29 | 0.0222 | AT2G46300 |
| 0.00 | 3.27 | 3.30 | 3.28 | 0.0029 | AT1G30710 |
| 0.00 | 3.51 | 3.04 | 3.27 | 0.0456 | AT5G50040 |
| 0.00 | 3.16 | 3.39 | 3.27 | 0.0223 | AT3G28830 |
| 0.00 | 3.48 | 3.06 | 3.27 | 0.0408 | AT5G37670 |
| 0.00 | 3.08 | 3.44 | 3.26 | 0.0351 | AT2G40340 |
| 0.00 | 3.23 | 3.29 | 3.26 | 0.0059 | AT1G76370 |

|      |      |      |      |        |           |
|------|------|------|------|--------|-----------|
| 0.00 | 3.19 | 3.32 | 3.26 | 0.0127 | AT5G26717 |
| 0.00 | 3.22 | 3.28 | 3.25 | 0.0059 | AT4G25780 |
| 0.00 | 3.04 | 3.46 | 3.25 | 0.0411 | AT4G29658 |
| 0.00 | 3.48 | 3.02 | 3.25 | 0.0450 | AT3G25760 |
| 0.00 | 3.39 | 3.11 | 3.25 | 0.0274 | AT4G35700 |
| 0.00 | 3.11 | 3.38 | 3.25 | 0.0265 | AT2G40850 |
| 0.00 | 3.23 | 3.25 | 3.24 | 0.0020 | AT3G46700 |
| 0.00 | 3.20 | 3.27 | 3.23 | 0.0069 | AT5G64750 |
| 0.00 | 3.23 | 3.22 | 3.23 | 0.0010 | AT3G61230 |
| 0.00 | 3.05 | 3.40 | 3.22 | 0.0345 | AT3G25655 |
| 0.00 | 3.46 | 2.97 | 3.22 | 0.0484 | AT5G35110 |
| 0.00 | 3.28 | 3.14 | 3.21 | 0.0139 | AT1G69940 |
| 0.00 | 3.37 | 3.06 | 3.21 | 0.0307 | AT1G02575 |
| 0.00 | 3.02 | 3.40 | 3.21 | 0.0376 | AT1G13520 |
| 0.00 | 3.19 | 3.23 | 3.21 | 0.0040 | AT5G58050 |
| 0.00 | 2.99 | 3.42 | 3.21 | 0.0426 | AT3G25573 |
| 0.00 | 3.19 | 3.22 | 3.21 | 0.0030 | AT3G21720 |
| 0.00 | 3.07 | 3.34 | 3.20 | 0.0268 | AT3G20580 |
| 0.00 | 3.06 | 3.35 | 3.20 | 0.0288 | AT3G02810 |
| 0.00 | 3.34 | 3.05 | 3.20 | 0.0289 | AT3G26110 |
| 0.00 | 3.21 | 3.18 | 3.19 | 0.0030 | AT4G02650 |
| 0.00 | 3.24 | 3.14 | 3.19 | 0.0100 | AT1G64170 |
| 0.00 | 3.18 | 3.20 | 3.19 | 0.0020 | AT1G01980 |
| 0.00 | 2.98 | 3.39 | 3.18 | 0.0409 | AT1G66210 |
| 0.00 | 3.19 | 3.15 | 3.17 | 0.0040 | AT5G48540 |
| 0.00 | 3.05 | 3.29 | 3.17 | 0.0241 | AT3G05150 |
| 0.00 | 3.36 | 2.98 | 3.17 | 0.0381 | AT5G25340 |
| 0.00 | 3.27 | 3.06 | 3.17 | 0.0211 | AT1G01460 |
| 0.00 | 3.16 | 3.17 | 3.16 | 0.0010 | AT1G24620 |
| 0.00 | 2.92 | 3.40 | 3.16 | 0.0483 | AT4G00940 |
| 0.00 | 3.10 | 3.22 | 3.16 | 0.0121 | AT1G74590 |
| 0.00 | 3.31 | 3.02 | 3.16 | 0.0291 | AT2G46860 |
| 0.00 | 3.21 | 3.12 | 3.16 | 0.0091 | AT5G11920 |
| 0.00 | 3.21 | 3.11 | 3.16 | 0.0101 | AT1G26380 |
| 0.00 | 3.32 | 2.99 | 3.15 | 0.0333 | AT3G44870 |
| 0.00 | 2.99 | 3.32 | 3.15 | 0.0333 | AT5G53050 |
| 0.00 | 2.99 | 3.32 | 3.15 | 0.0333 | AT1G53870 |
| 0.00 | 3.04 | 3.27 | 3.15 | 0.0232 | AT1G17540 |
| 0.00 | 3.01 | 3.29 | 3.15 | 0.0283 | AT3G47780 |
| 0.00 | 3.12 | 3.18 | 3.15 | 0.0061 | AT3G20210 |
| 0.00 | 2.97 | 3.32 | 3.14 | 0.0354 | AT5G49920 |
| 0.00 | 3.19 | 3.09 | 3.14 | 0.0101 | AT1G19610 |
| 0.00 | 3.13 | 3.15 | 3.14 | 0.0020 | AT1G54890 |
| 0.00 | 3.13 | 3.15 | 3.14 | 0.0020 | AT1G67290 |
| 0.00 | 3.38 | 2.89 | 3.14 | 0.0497 | AT4G31970 |
| 0.00 | 3.32 | 2.96 | 3.14 | 0.0365 | AT2G40180 |

|      |      |      |      |        |           |
|------|------|------|------|--------|-----------|
| 0.00 | 3.02 | 3.24 | 3.13 | 0.0224 | AT1G66600 |
| 0.00 | 3.13 | 3.13 | 3.13 | 0.0000 | AT4G36490 |
| 0.00 | 2.97 | 3.29 | 3.13 | 0.0325 | AT5G02780 |
| 0.00 | 3.14 | 3.11 | 3.12 | 0.0031 | AT5G12000 |
| 0.00 | 3.17 | 3.07 | 3.12 | 0.0102 | AT5G20390 |
| 0.00 | 3.06 | 3.17 | 3.12 | 0.0112 | AT1G49270 |
| 0.00 | 3.15 | 3.07 | 3.11 | 0.0082 | AT1G07160 |
| 0.00 | 3.11 | 3.11 | 3.11 | 0.0000 | AT2G34500 |
| 0.00 | 3.23 | 2.98 | 3.11 | 0.0256 | AT4G14710 |
| 0.00 | 3.28 | 2.93 | 3.10 | 0.0358 | AT2G26490 |
| 0.00 | 3.15 | 3.06 | 3.10 | 0.0092 | AT1G30473 |
| 0.00 | 2.91 | 3.29 | 3.10 | 0.0390 | AT3G27170 |
| 0.00 | 2.97 | 3.24 | 3.10 | 0.0277 | AT2G05850 |
| 0.00 | 3.12 | 3.08 | 3.10 | 0.0041 | AT4G19810 |
| 0.00 | 3.08 | 3.12 | 3.10 | 0.0041 | AT5G48430 |
| 0.00 | 2.90 | 3.29 | 3.09 | 0.0401 | AT1G32940 |
| 0.00 | 2.97 | 3.21 | 3.09 | 0.0247 | AT3G20530 |
| 0.00 | 2.97 | 3.21 | 3.09 | 0.0247 | AT4G26260 |
| 0.00 | 3.03 | 3.14 | 3.09 | 0.0113 | AT4G03290 |
| 0.00 | 3.21 | 2.95 | 3.08 | 0.0269 | AT5G57510 |
| 0.00 | 3.05 | 3.11 | 3.08 | 0.0062 | AT4G00350 |
| 0.00 | 2.98 | 3.17 | 3.08 | 0.0197 | AT1G69930 |
| 0.00 | 3.06 | 3.09 | 3.08 | 0.0031 | AT1G02090 |
| 0.00 | 3.05 | 3.09 | 3.07 | 0.0041 | AT3G17060 |
| 0.00 | 3.03 | 3.11 | 3.07 | 0.0083 | AT5G05070 |
| 0.00 | 2.94 | 3.20 | 3.07 | 0.0269 | AT5G15450 |
| 0.00 | 3.08 | 3.05 | 3.06 | 0.0031 | AT1G01310 |
| 0.00 | 3.14 | 2.98 | 3.06 | 0.0166 | AT3G43250 |
| 0.00 | 3.06 | 3.06 | 3.06 | 0.0000 | AT4G25200 |
| 0.00 | 3.10 | 3.01 | 3.06 | 0.0094 | AT5G55490 |
| 0.00 | 3.10 | 3.02 | 3.06 | 0.0083 | AT5G57150 |
| 0.00 | 3.17 | 2.94 | 3.05 | 0.0240 | AT4G38190 |
| 0.00 | 3.18 | 2.92 | 3.05 | 0.0271 | AT4G33905 |
| 0.00 | 3.03 | 3.07 | 3.05 | 0.0042 | AT1G05580 |
| 0.00 | 3.02 | 3.06 | 3.04 | 0.0042 | AT1G77530 |
| 0.00 | 2.86 | 3.20 | 3.03 | 0.0357 | AT3G53230 |
| 0.00 | 3.00 | 3.07 | 3.03 | 0.0073 | AT2G23900 |
| 0.00 | 3.14 | 2.93 | 3.03 | 0.0220 | AT3G21080 |
| 0.00 | 2.99 | 3.06 | 3.03 | 0.0074 | AT1G10770 |
| 0.00 | 2.92 | 3.13 | 3.03 | 0.0221 | AT1G48020 |
| 0.00 | 3.04 | 3.01 | 3.03 | 0.0032 | AT3G47760 |
| 0.00 | 3.08 | 2.97 | 3.03 | 0.0116 | AT1G61120 |
| 0.00 | 2.81 | 3.23 | 3.02 | 0.0442 | AT5G61710 |
| 0.00 | 3.19 | 2.85 | 3.02 | 0.0358 | AT3G25170 |
| 0.00 | 3.20 | 2.84 | 3.02 | 0.0379 | AT1G61800 |
| 0.00 | 3.21 | 2.81 | 3.01 | 0.0422 | AT2G02720 |



|      |      |      |      |        |           |
|------|------|------|------|--------|-----------|
| 0.00 | 2.85 | 3.17 | 3.01 | 0.0338 | AT1G60760 |
| 0.00 | 3.02 | 2.99 | 3.01 | 0.0032 | AT2G45130 |
| 0.00 | 2.84 | 3.16 | 3.00 | 0.0339 | AT1G02360 |
| 0.00 | 2.96 | 3.03 | 3.00 | 0.0074 | AT3G04700 |
| 0.00 | 2.99 | 3.00 | 3.00 | 0.0011 | AT5G45090 |
| 0.00 | 2.79 | 3.19 | 2.99 | 0.0425 | AT5G49690 |
| 0.00 | 2.78 | 3.20 | 2.99 | 0.0446 | AT4G29460 |
| 0.00 | 3.12 | 2.86 | 2.99 | 0.0277 | AT5G59540 |
| 0.00 | 3.11 | 2.85 | 2.98 | 0.0278 | AT5G20820 |
| 0.00 | 3.19 | 2.77 | 2.98 | 0.0448 | AT1G19250 |
| 0.00 | 2.88 | 3.08 | 2.98 | 0.0214 | AT1G08140 |
| 0.00 | 3.05 | 2.89 | 2.97 | 0.0171 | AT3G21520 |
| 0.00 | 2.98 | 2.96 | 2.97 | 0.0021 | AT3G19310 |
| 0.00 | 3.05 | 2.89 | 2.97 | 0.0171 | AT4G19038 |
| 0.00 | 2.91 | 3.03 | 2.97 | 0.0129 | AT5G08250 |
| 0.00 | 2.85 | 3.09 | 2.97 | 0.0257 | AT4G15980 |
| 0.00 | 3.18 | 2.75 | 2.97 | 0.0461 | AT2G29460 |
| 0.00 | 2.92 | 3.01 | 2.96 | 0.0097 | AT4G27580 |
| 0.00 | 3.07 | 2.86 | 2.96 | 0.0225 | AT1G63245 |
| 0.00 | 3.05 | 2.87 | 2.96 | 0.0194 | AT1G14880 |
| 0.00 | 3.01 | 2.91 | 2.96 | 0.0108 | AT3G13227 |
| 0.00 | 2.73 | 3.18 | 2.95 | 0.0484 | AT4G18170 |
| 0.00 | 2.74 | 3.16 | 2.95 | 0.0452 | AT2G02310 |
| 0.00 | 3.03 | 2.86 | 2.95 | 0.0184 | AT1G22400 |
| 0.00 | 3.03 | 2.86 | 2.94 | 0.0184 | AT3G05725 |
| 0.00 | 2.89 | 2.99 | 2.94 | 0.0108 | AT3G05610 |
| 0.00 | 2.80 | 3.08 | 2.94 | 0.0303 | AT1G30850 |
| 0.00 | 3.12 | 2.75 | 2.94 | 0.0401 | AT1G76070 |
| 0.00 | 2.78 | 3.09 | 2.94 | 0.0336 | AT2G33460 |
| 0.00 | 3.03 | 2.84 | 2.93 | 0.0206 | AT1G60740 |
| 0.00 | 3.04 | 2.82 | 2.93 | 0.0239 | AT5G54095 |
| 0.00 | 2.77 | 3.09 | 2.93 | 0.0347 | AT1G07500 |
| 0.00 | 2.78 | 3.08 | 2.93 | 0.0326 | AT3G04070 |
| 0.00 | 2.92 | 2.91 | 2.92 | 0.0011 | AT5G40990 |
| 0.00 | 2.74 | 3.09 | 2.91 | 0.0382 | AT1G55920 |
| 0.00 | 2.78 | 3.05 | 2.91 | 0.0295 | AT4G05100 |
| 0.00 | 2.94 | 2.88 | 2.91 | 0.0066 | AT2G35980 |
| 0.00 | 2.83 | 2.99 | 2.91 | 0.0175 | AT1G71000 |
| 0.00 | 2.96 | 2.86 | 2.91 | 0.0109 | AT5G14890 |
| 0.00 | 2.96 | 2.86 | 2.91 | 0.0109 | AT3G52010 |
| 0.00 | 3.10 | 2.71 | 2.91 | 0.0427 | AT5G57520 |
| 0.00 | 2.95 | 2.86 | 2.91 | 0.0099 | AT3G28510 |
| 0.00 | 3.03 | 2.79 | 2.91 | 0.0262 | AT5G67080 |
| 0.00 | 2.79 | 3.01 | 2.90 | 0.0241 | AT3G62180 |
| 0.00 | 2.69 | 3.09 | 2.89 | 0.0440 | AT1G51410 |
| 0.00 | 2.96 | 2.82 | 2.89 | 0.0154 | AT5G58770 |

|      |      |      |      |        |           |
|------|------|------|------|--------|-----------|
| 0.00 | 2.89 | 2.89 | 2.89 | 0.0000 | AT5G09590 |
| 0.00 | 2.89 | 2.87 | 2.88 | 0.0022 | AT4G37150 |
| 0.00 | 2.98 | 2.78 | 2.88 | 0.0221 | AT1G22810 |
| 0.00 | 2.87 | 2.90 | 2.88 | 0.0033 | AT3G20190 |
| 0.00 | 2.91 | 2.85 | 2.88 | 0.0066 | AT2G07040 |
| 0.00 | 2.93 | 2.82 | 2.88 | 0.0122 | AT5G25450 |
| 0.00 | 2.96 | 2.79 | 2.88 | 0.0188 | AT3G55970 |
| 0.00 | 2.98 | 2.77 | 2.87 | 0.0232 | AT5G48400 |
| 0.00 | 2.89 | 2.85 | 2.87 | 0.0044 | AT5G39880 |
| 0.00 | 2.89 | 2.84 | 2.87 | 0.0056 | AT1G35490 |
| 0.00 | 2.83 | 2.89 | 2.86 | 0.0067 | AT4G09300 |
| 0.00 | 2.70 | 3.01 | 2.86 | 0.0345 | AT2G38340 |
| 0.00 | 2.91 | 2.81 | 2.86 | 0.0111 | AT2G29420 |
| 0.00 | 2.78 | 2.93 | 2.85 | 0.0167 | AT1G54575 |
| 0.00 | 2.66 | 3.04 | 2.85 | 0.0424 | AT1G03050 |
| 0.00 | 2.98 | 2.72 | 2.85 | 0.0290 | AT2G39530 |
| 0.00 | 2.65 | 3.04 | 2.85 | 0.0436 | AT1G66060 |
| 0.00 | 2.65 | 3.02 | 2.84 | 0.0415 | AT3G62640 |
| 0.00 | 2.87 | 2.79 | 2.83 | 0.0090 | AT3G44860 |
| 0.00 | 2.67 | 2.99 | 2.83 | 0.0360 | AT5G26220 |
| 0.00 | 3.00 | 2.66 | 2.83 | 0.0382 | AT1G44160 |
| 0.00 | 2.83 | 2.82 | 2.83 | 0.0011 | AT5G54170 |
| 0.00 | 2.69 | 2.96 | 2.82 | 0.0304 | AT2G47040 |
| 0.00 | 2.86 | 2.78 | 2.82 | 0.0090 | AT5G50030 |
| 0.00 | 2.80 | 2.85 | 2.82 | 0.0056 | AT2G33100 |
| 0.00 | 2.64 | 2.99 | 2.81 | 0.0395 | AT3G26934 |
| 0.00 | 3.01 | 2.61 | 2.81 | 0.0452 | AT1G48820 |
| 0.00 | 2.67 | 2.94 | 2.81 | 0.0306 | AT5G42150 |
| 0.00 | 2.71 | 2.89 | 2.80 | 0.0205 | AT5G28690 |
| 0.00 | 2.74 | 2.86 | 2.80 | 0.0136 | AT3G27331 |
| 0.00 | 2.69 | 2.91 | 2.80 | 0.0250 | AT1G17170 |
| 0.00 | 2.89 | 2.71 | 2.80 | 0.0205 | AT4G25590 |
| 0.00 | 3.00 | 2.60 | 2.80 | 0.0454 | AT1G19025 |
| 0.00 | 2.88 | 2.71 | 2.79 | 0.0194 | AT1G44120 |
| 0.00 | 2.58 | 2.99 | 2.79 | 0.0468 | AT1G61680 |
| 0.00 | 2.78 | 2.80 | 2.79 | 0.0023 | AT1G76690 |
| 0.00 | 2.62 | 2.95 | 2.79 | 0.0377 | AT1G68110 |
| 0.00 | 2.83 | 2.73 | 2.78 | 0.0114 | AT5G52640 |
| 0.00 | 2.90 | 2.65 | 2.78 | 0.0287 | AT4G23493 |
| 0.00 | 2.86 | 2.69 | 2.78 | 0.0195 | AT1G23350 |
| 0.00 | 2.60 | 2.93 | 2.77 | 0.0379 | AT1G09935 |
| 0.00 | 2.70 | 2.84 | 2.77 | 0.0161 | AT3G29250 |
| 0.00 | 2.75 | 2.78 | 2.76 | 0.0035 | AT4G35170 |
| 0.00 | 2.96 | 2.56 | 2.76 | 0.0461 | AT3G19020 |
| 0.00 | 2.54 | 2.97 | 2.75 | 0.0496 | AT4G34530 |
| 0.00 | 2.92 | 2.58 | 2.75 | 0.0393 | AT1G68610 |

|      |      |      |      |        |           |
|------|------|------|------|--------|-----------|
| 0.00 | 2.75 | 2.75 | 2.75 | 0.0000 | AT4G01895 |
| 0.00 | 2.81 | 2.69 | 2.75 | 0.0139 | AT3G15500 |
| 0.00 | 2.89 | 2.61 | 2.75 | 0.0324 | AT2G31500 |
| 0.00 | 2.78 | 2.71 | 2.75 | 0.0081 | AT4G23700 |
| 0.00 | 2.60 | 2.90 | 2.75 | 0.0347 | AT3G03800 |
| 0.00 | 2.65 | 2.85 | 2.75 | 0.0231 | AT5G51680 |
| 0.00 | 2.81 | 2.68 | 2.75 | 0.0151 | AT1G13890 |
| 0.00 | 2.70 | 2.78 | 2.74 | 0.0093 | AT4G38060 |
| 0.00 | 2.87 | 2.61 | 2.74 | 0.0302 | AT5G51440 |
| 0.00 | 2.66 | 2.81 | 2.74 | 0.0175 | AT1G11100 |
| 0.00 | 2.72 | 2.75 | 2.73 | 0.0035 | AT1G76680 |
| 0.00 | 2.74 | 2.73 | 2.73 | 0.0012 | AT5G15250 |
| 0.00 | 2.72 | 2.73 | 2.72 | 0.0012 | AT2G44240 |
| 0.00 | 2.73 | 2.71 | 2.72 | 0.0023 | AT1G49520 |
| 0.00 | 2.75 | 2.68 | 2.72 | 0.0082 | AT2G25600 |
| 0.00 | 2.82 | 2.60 | 2.71 | 0.0258 | AT1G02390 |
| 0.00 | 2.70 | 2.72 | 2.71 | 0.0023 | AT2G25140 |
| 0.00 | 2.62 | 2.80 | 2.71 | 0.0211 | AT3G47440 |
| 0.00 | 2.70 | 2.71 | 2.71 | 0.0012 | AT3G09520 |
| 0.00 | 2.59 | 2.82 | 2.70 | 0.0270 | AT5G45880 |
| 0.00 | 2.52 | 2.88 | 2.70 | 0.0424 | AT1G30475 |
| 0.00 | 2.65 | 2.75 | 2.70 | 0.0118 | AT2G29410 |
| 0.00 | 2.75 | 2.64 | 2.70 | 0.0130 | AT1G74010 |
| 0.00 | 2.86 | 2.53 | 2.70 | 0.0389 | AT3G01700 |
| 0.00 | 2.51 | 2.89 | 2.70 | 0.0447 | AT5G62660 |
| 0.00 | 2.79 | 2.60 | 2.69 | 0.0224 | AT2G19190 |
| 0.00 | 2.77 | 2.61 | 2.69 | 0.0189 | AT5G47000 |
| 0.00 | 2.75 | 2.63 | 2.69 | 0.0142 | AT4G28290 |
| 0.00 | 2.71 | 2.65 | 2.68 | 0.0071 | AT1G17870 |
| 0.00 | 2.55 | 2.80 | 2.68 | 0.0297 | AT1G01750 |
| 0.00 | 2.75 | 2.59 | 2.67 | 0.0191 | AT1G79400 |
| 0.00 | 2.59 | 2.75 | 2.67 | 0.0191 | AT5G15600 |
| 0.00 | 2.71 | 2.63 | 2.67 | 0.0095 | AT5G61680 |
| 0.00 | 2.79 | 2.54 | 2.67 | 0.0298 | AT1G65610 |
| 0.00 | 2.87 | 2.46 | 2.67 | 0.0489 | AT1G72510 |
| 0.00 | 2.66 | 2.67 | 2.66 | 0.0012 | AT1G70140 |
| 0.00 | 2.72 | 2.61 | 2.66 | 0.0131 | AT5G07430 |
| 0.00 | 2.53 | 2.78 | 2.66 | 0.0300 | AT1G67000 |
| 0.00 | 2.68 | 2.62 | 2.65 | 0.0072 | AT1G62730 |
| 0.00 | 2.65 | 2.65 | 2.65 | 0.0000 | AT1G12060 |
| 0.00 | 2.67 | 2.62 | 2.65 | 0.0060 | AT5G19473 |
| 0.00 | 2.45 | 2.84 | 2.64 | 0.0468 | AT3G48520 |
| 0.00 | 2.74 | 2.54 | 2.64 | 0.0241 | AT3G57690 |
| 0.00 | 2.50 | 2.79 | 2.64 | 0.0349 | AT2G18210 |
| 0.00 | 2.56 | 2.72 | 2.64 | 0.0193 | AT2G28490 |
| 0.00 | 2.51 | 2.76 | 2.63 | 0.0302 | AT3G06260 |

|      |      |      |      |        |           |
|------|------|------|------|--------|-----------|
| 0.00 | 2.76 | 2.50 | 2.63 | 0.0314 | AT4G39610 |
| 0.00 | 2.68 | 2.57 | 2.63 | 0.0133 | AT1G08310 |
| 0.00 | 2.50 | 2.75 | 2.63 | 0.0303 | AT2G47050 |
| 0.00 | 2.73 | 2.52 | 2.63 | 0.0255 | AT3G26830 |
| 0.00 | 2.51 | 2.74 | 2.62 | 0.0279 | AT2G17050 |
| 0.00 | 2.71 | 2.53 | 2.62 | 0.0219 | AT5G36220 |
| 0.00 | 2.76 | 2.48 | 2.62 | 0.0340 | AT5G48570 |
| 0.00 | 2.72 | 2.52 | 2.62 | 0.0243 | AT5G55970 |
| 0.00 | 2.55 | 2.66 | 2.61 | 0.0134 | AT2G35765 |
| 0.00 | 2.71 | 2.49 | 2.60 | 0.0269 | AT3G28210 |
| 0.00 | 2.63 | 2.56 | 2.60 | 0.0086 | AT2G27180 |
| 0.00 | 2.77 | 2.42 | 2.59 | 0.0429 | AT5G25350 |
| 0.00 | 2.42 | 2.76 | 2.59 | 0.0417 | AT2G22180 |
| 0.00 | 2.51 | 2.67 | 2.59 | 0.0197 | AT1G48000 |
| 0.00 | 2.64 | 2.54 | 2.59 | 0.0123 | AT4G21120 |
| 0.00 | 2.54 | 2.64 | 2.59 | 0.0123 | AT5G02750 |
| 0.00 | 2.58 | 2.59 | 2.59 | 0.0012 | AT4G21850 |
| 0.00 | 2.47 | 2.70 | 2.58 | 0.0283 | AT1G78340 |
| 0.00 | 2.54 | 2.62 | 2.58 | 0.0099 | AT3G09960 |
| 0.00 | 2.71 | 2.43 | 2.57 | 0.0346 | AT2G33270 |
| 0.00 | 2.58 | 2.55 | 2.57 | 0.0037 | AT1G04470 |
| 0.00 | 2.62 | 2.50 | 2.56 | 0.0149 | AT2G42005 |
| 0.00 | 2.63 | 2.49 | 2.56 | 0.0174 | AT1G14080 |
| 0.00 | 2.60 | 2.51 | 2.56 | 0.0112 | AT3G18250 |
| 0.00 | 2.41 | 2.69 | 2.55 | 0.0349 | AT4G32810 |
| 0.00 | 2.45 | 2.65 | 2.55 | 0.0250 | AT1G01940 |
| 0.00 | 2.45 | 2.65 | 2.55 | 0.0250 | AT5G10410 |
| 0.00 | 2.50 | 2.59 | 2.55 | 0.0113 | AT4G12545 |
| 0.00 | 2.51 | 2.58 | 2.55 | 0.0088 | AT5G56840 |
| 0.00 | 2.57 | 2.52 | 2.55 | 0.0063 | AT2G22340 |
| 0.00 | 2.34 | 2.74 | 2.54 | 0.0500 | AT5G51060 |
| 0.00 | 2.71 | 2.37 | 2.54 | 0.0425 | AT2G29490 |
| 0.00 | 2.56 | 2.50 | 2.53 | 0.0075 | AT1G02920 |
| 0.00 | 2.51 | 2.56 | 2.53 | 0.0063 | AT4G04510 |
| 0.00 | 2.70 | 2.35 | 2.53 | 0.0441 | AT5G16500 |
| 0.00 | 2.51 | 2.54 | 2.53 | 0.0038 | AT3G08970 |
| 0.00 | 2.60 | 2.45 | 2.52 | 0.0189 | AT3G43120 |
| 0.00 | 2.53 | 2.51 | 2.52 | 0.0025 | AT3G52450 |
| 0.00 | 2.48 | 2.56 | 2.52 | 0.0101 | AT1G03070 |
| 0.00 | 2.54 | 2.50 | 2.52 | 0.0051 | AT4G15420 |
| 0.00 | 2.44 | 2.59 | 2.51 | 0.0190 | AT1G13970 |
| 0.00 | 2.41 | 2.61 | 2.51 | 0.0253 | AT4G36990 |
| 0.00 | 2.35 | 2.66 | 2.50 | 0.0393 | AT2G32530 |
| 0.00 | 2.33 | 2.67 | 2.50 | 0.0432 | AT1G73165 |
| 0.00 | 2.48 | 2.52 | 2.50 | 0.0051 | AT1G30070 |
| 0.00 | 2.52 | 2.47 | 2.50 | 0.0064 | AT5G13150 |

|      |      |      |      |        |           |
|------|------|------|------|--------|-----------|
| 0.00 | 2.50 | 2.49 | 2.50 | 0.0013 | AT4G35180 |
| 0.00 | 2.62 | 2.37 | 2.50 | 0.0319 | AT5G60260 |
| 0.00 | 2.34 | 2.65 | 2.49 | 0.0395 | AT3G10320 |
| 0.00 | 2.61 | 2.37 | 2.49 | 0.0307 | AT2G26410 |
| 0.00 | 2.41 | 2.56 | 2.48 | 0.0192 | AT1G63930 |
| 0.00 | 2.58 | 2.37 | 2.47 | 0.0270 | AT1G11720 |
| 0.00 | 2.58 | 2.35 | 2.47 | 0.0297 | AT1G51890 |
| 0.00 | 2.44 | 2.48 | 2.46 | 0.0052 | AT5G26700 |
| 0.00 | 2.40 | 2.52 | 2.46 | 0.0155 | AT1G61610 |
| 0.00 | 2.59 | 2.32 | 2.46 | 0.0350 | AT2G02320 |
| 0.00 | 2.38 | 2.53 | 2.46 | 0.0194 | AT1G77450 |
| 0.00 | 2.46 | 2.45 | 2.45 | 0.0013 | AT4G17250 |
| 0.00 | 2.31 | 2.60 | 2.45 | 0.0376 | AT2G29950 |
| 0.00 | 2.58 | 2.33 | 2.45 | 0.0324 | AT2G04070 |
| 0.00 | 2.53 | 2.37 | 2.45 | 0.0208 | AT5G16980 |
| 0.00 | 2.42 | 2.48 | 2.45 | 0.0078 | AT1G66700 |
| 0.00 | 2.45 | 2.45 | 2.45 | 0.0000 | AT4G08170 |
| 0.00 | 2.51 | 2.38 | 2.45 | 0.0169 | AT4G12500 |
| 0.00 | 2.33 | 2.56 | 2.44 | 0.0299 | AT5G45810 |
| 0.00 | 2.48 | 2.40 | 2.44 | 0.0104 | AT2G17500 |
| 0.00 | 2.25 | 2.62 | 2.44 | 0.0483 | AT5G60300 |
| 0.00 | 2.55 | 2.32 | 2.43 | 0.0300 | AT5G12340 |
| 0.00 | 2.49 | 2.38 | 2.43 | 0.0144 | AT1G22985 |
| 0.00 | 2.53 | 2.33 | 2.43 | 0.0262 | AT4G18430 |
| 0.00 | 2.51 | 2.33 | 2.42 | 0.0237 | AT5G39520 |
| 0.00 | 2.39 | 2.46 | 2.42 | 0.0092 | AT3G48450 |
| 0.00 | 2.26 | 2.58 | 2.42 | 0.0420 | AT2G32830 |
| 0.00 | 2.42 | 2.42 | 2.42 | 0.0000 | AT3G62230 |
| 0.00 | 2.49 | 2.35 | 2.42 | 0.0184 | AT5G16010 |
| 0.00 | 2.43 | 2.41 | 2.42 | 0.0026 | AT1G62420 |
| 0.00 | 2.27 | 2.56 | 2.42 | 0.0382 | AT2G30770 |
| 0.00 | 2.49 | 2.35 | 2.42 | 0.0184 | AT3G48850 |
| 0.00 | 2.53 | 2.28 | 2.41 | 0.0331 | AT1G13360 |
| 0.00 | 2.30 | 2.50 | 2.40 | 0.0265 | AT5G48410 |
| 0.00 | 2.51 | 2.29 | 2.40 | 0.0292 | AT2G45210 |
| 0.00 | 2.45 | 2.34 | 2.40 | 0.0146 | AT2G39410 |
| 0.00 | 2.45 | 2.33 | 2.39 | 0.0160 | AT2G44940 |
| 0.00 | 2.35 | 2.41 | 2.38 | 0.0080 | AT5G44920 |
| 0.00 | 2.36 | 2.39 | 2.38 | 0.0040 | AT2G01920 |
| 0.00 | 2.19 | 2.55 | 2.37 | 0.0483 | AT3G04710 |
| 0.00 | 2.37 | 2.36 | 2.37 | 0.0013 | AT3G42640 |
| 0.00 | 2.33 | 2.40 | 2.36 | 0.0094 | AT4G19760 |
| 0.00 | 2.23 | 2.48 | 2.36 | 0.0338 | AT2G30840 |
| 0.00 | 2.50 | 2.22 | 2.36 | 0.0377 | AT2G33420 |
| 0.00 | 2.42 | 2.27 | 2.34 | 0.0204 | AT4G09100 |
| 0.00 | 2.42 | 2.27 | 2.34 | 0.0204 | AT1G53990 |

|      |      |      |      |        |           |
|------|------|------|------|--------|-----------|
| 0.00 | 2.41 | 2.28 | 2.34 | 0.0176 | AT1G51920 |
| 0.00 | 2.26 | 2.42 | 2.34 | 0.0218 | AT1G17020 |
| 0.00 | 2.38 | 2.30 | 2.34 | 0.0109 | AT5G13220 |
| 0.00 | 2.16 | 2.52 | 2.34 | 0.0489 | AT5G37340 |
| 0.00 | 2.18 | 2.49 | 2.34 | 0.0422 | AT2G43000 |
| 0.00 | 2.32 | 2.35 | 2.34 | 0.0041 | AT3G47420 |
| 0.00 | 2.44 | 2.23 | 2.33 | 0.0286 | AT5G03630 |
| 0.00 | 2.30 | 2.36 | 2.33 | 0.0082 | AT4G03320 |
| 0.00 | 2.28 | 2.38 | 2.33 | 0.0137 | AT5G38900 |
| 0.00 | 2.23 | 2.43 | 2.33 | 0.0273 | AT4G27410 |
| 0.00 | 2.30 | 2.36 | 2.33 | 0.0082 | AT2G32120 |
| 0.00 | 2.45 | 2.20 | 2.33 | 0.0342 | AT1G66510 |
| 0.00 | 2.41 | 2.23 | 2.32 | 0.0247 | AT3G17790 |
| 0.00 | 2.46 | 2.19 | 2.32 | 0.0369 | AT1G03780 |
| 0.00 | 2.34 | 2.30 | 2.32 | 0.0055 | AT2G43018 |
| 0.00 | 2.29 | 2.34 | 2.32 | 0.0069 | AT5G04610 |
| 0.00 | 2.28 | 2.35 | 2.31 | 0.0096 | AT2G03850 |
| 0.00 | 2.39 | 2.24 | 2.31 | 0.0206 | AT3G23220 |
| 0.00 | 2.29 | 2.34 | 2.31 | 0.0069 | AT3G59940 |
| 0.00 | 2.48 | 2.15 | 2.31 | 0.0453 | AT4G12410 |
| 0.00 | 2.31 | 2.30 | 2.30 | 0.0014 | AT5G01550 |
| 0.00 | 2.34 | 2.27 | 2.30 | 0.0097 | AT1G55570 |
| 0.00 | 2.26 | 2.35 | 2.30 | 0.0124 | AT5G49700 |
| 0.00 | 2.34 | 2.26 | 2.30 | 0.0111 | AT3G01630 |
| 0.00 | 2.30 | 2.30 | 2.30 | 0.0000 | AT5G44990 |
| 0.00 | 2.47 | 2.13 | 2.30 | 0.0470 | AT1G32970 |
| 0.00 | 2.35 | 2.25 | 2.30 | 0.0138 | AT2G35730 |
| 0.00 | 2.15 | 2.44 | 2.30 | 0.0402 | AT3G52080 |
| 0.00 | 2.32 | 2.27 | 2.30 | 0.0069 | AT1G09480 |
| 0.00 | 2.22 | 2.37 | 2.30 | 0.0208 | AT4G33467 |
| 0.00 | 2.31 | 2.28 | 2.29 | 0.0042 | AT2G46240 |
| 0.00 | 2.28 | 2.30 | 2.29 | 0.0028 | AT3G62170 |
| 0.00 | 2.12 | 2.45 | 2.28 | 0.0459 | AT3G18950 |
| 0.00 | 2.43 | 2.13 | 2.28 | 0.0418 | AT4G13560 |
| 0.00 | 2.26 | 2.30 | 2.28 | 0.0056 | AT1G47890 |
| 0.00 | 2.32 | 2.25 | 2.28 | 0.0098 | AT2G21640 |
| 0.00 | 2.18 | 2.37 | 2.28 | 0.0266 | AT4G26120 |
| 0.00 | 2.24 | 2.31 | 2.27 | 0.0098 | AT4G21840 |
| 0.00 | 2.31 | 2.24 | 2.27 | 0.0098 | AT3G21180 |
| 0.00 | 2.36 | 2.18 | 2.27 | 0.0252 | AT5G14380 |
| 0.00 | 2.26 | 2.27 | 2.27 | 0.0014 | AT4G27790 |
| 0.00 | 2.19 | 2.34 | 2.26 | 0.0211 | AT3G22600 |
| 0.00 | 2.38 | 2.14 | 2.26 | 0.0338 | AT1G43800 |
| 0.00 | 2.31 | 2.21 | 2.26 | 0.0141 | AT1G68630 |
| 0.00 | 2.21 | 2.31 | 2.26 | 0.0141 | AT2G29440 |
| 0.00 | 2.37 | 2.14 | 2.26 | 0.0324 | AT3G55890 |

|      |      |      |      |        |           |
|------|------|------|------|--------|-----------|
| 0.00 | 2.10 | 2.41 | 2.25 | 0.0437 | AT1G15380 |
| 0.00 | 2.25 | 2.25 | 2.25 | 0.0000 | AT1G76930 |
| 0.00 | 2.17 | 2.31 | 2.24 | 0.0199 | AT3G52460 |
| 0.00 | 2.20 | 2.28 | 2.24 | 0.0114 | AT3G24620 |
| 0.00 | 2.19 | 2.28 | 2.24 | 0.0128 | AT1G61860 |
| 0.00 | 2.35 | 2.13 | 2.24 | 0.0312 | AT1G63910 |
| 0.00 | 2.33 | 2.14 | 2.23 | 0.0270 | AT2G35210 |
| 0.00 | 2.25 | 2.22 | 2.23 | 0.0043 | AT2G22055 |
| 0.00 | 2.23 | 2.24 | 2.23 | 0.0014 | AT5G04890 |
| 0.00 | 2.07 | 2.40 | 2.23 | 0.0469 | AT5G13330 |
| 0.00 | 2.29 | 2.17 | 2.23 | 0.0171 | AT3G21700 |
| 0.00 | 2.28 | 2.18 | 2.23 | 0.0143 | AT4G14630 |
| 0.00 | 2.37 | 2.08 | 2.23 | 0.0414 | AT5G03610 |
| 0.00 | 2.28 | 2.17 | 2.23 | 0.0157 | AT1G76080 |
| 0.00 | 2.33 | 2.11 | 2.22 | 0.0315 | AT3G51910 |
| 0.00 | 2.18 | 2.26 | 2.22 | 0.0115 | AT5G50760 |
| 0.00 | 2.27 | 2.16 | 2.21 | 0.0158 | AT2G25470 |
| 0.00 | 2.25 | 2.18 | 2.21 | 0.0101 | AT3G13390 |
| 0.00 | 2.19 | 2.23 | 2.21 | 0.0058 | AT2G36690 |
| 0.00 | 2.28 | 2.14 | 2.21 | 0.0202 | AT3G09440 |
| 0.00 | 2.13 | 2.28 | 2.20 | 0.0216 | AT1G68390 |
| 0.00 | 2.13 | 2.27 | 2.20 | 0.0202 | AT3G49580 |
| 0.00 | 2.07 | 2.33 | 2.20 | 0.0376 | AT1G15520 |
| 0.00 | 2.29 | 2.11 | 2.20 | 0.0260 | AT2G45610 |
| 0.00 | 2.37 | 2.03 | 2.20 | 0.0491 | AT2G42360 |
| 0.00 | 2.16 | 2.23 | 2.20 | 0.0102 | AT3G22620 |
| 0.00 | 2.29 | 2.08 | 2.19 | 0.0306 | AT3G05140 |
| 0.00 | 2.17 | 2.20 | 2.18 | 0.0044 | AT3G46690 |
| 0.00 | 2.28 | 2.08 | 2.18 | 0.0292 | AT5G19875 |
| 0.00 | 2.13 | 2.22 | 2.18 | 0.0132 | AT3G02410 |
| 0.00 | 2.33 | 2.02 | 2.18 | 0.0453 | AT2G23770 |
| 0.00 | 2.29 | 2.06 | 2.18 | 0.0336 | AT3G51660 |
| 0.00 | 2.12 | 2.23 | 2.17 | 0.0161 | AT1G61290 |
| 0.00 | 2.24 | 2.11 | 2.17 | 0.0190 | AT5G45820 |
| 0.00 | 2.25 | 2.09 | 2.17 | 0.0235 | AT3G01240 |
| 0.00 | 2.26 | 2.08 | 2.17 | 0.0264 | AT5G64510 |
| 0.00 | 2.00 | 2.33 | 2.17 | 0.0484 | AT3G12910 |
| 0.00 | 2.03 | 2.29 | 2.16 | 0.0383 | AT4G36050 |
| 0.00 | 2.03 | 2.28 | 2.16 | 0.0369 | AT4G11170 |
| 0.00 | 2.32 | 1.99 | 2.16 | 0.0486 | AT2G02010 |
| 0.00 | 2.15 | 2.16 | 2.15 | 0.0015 | AT3G09405 |
| 0.00 | 2.19 | 2.11 | 2.15 | 0.0118 | AT1G17615 |
| 0.00 | 2.29 | 2.00 | 2.15 | 0.0430 | AT1G72416 |
| 0.00 | 2.07 | 2.21 | 2.14 | 0.0208 | AT4G15130 |
| 0.00 | 2.28 | 2.00 | 2.14 | 0.0416 | AT4G04078 |
| 0.00 | 2.21 | 2.07 | 2.14 | 0.0208 | AT1G69880 |



|      |      |      |      |        |           |
|------|------|------|------|--------|-----------|
| 0.00 | 2.10 | 2.18 | 2.14 | 0.0119 | AT5G36970 |
| 0.00 | 2.19 | 2.07 | 2.13 | 0.0179 | AT1G30700 |
| 0.00 | 2.26 | 1.99 | 2.13 | 0.0404 | AT3G01270 |
| 0.00 | 2.21 | 2.04 | 2.13 | 0.0255 | AT3G13310 |
| 0.00 | 2.29 | 1.96 | 2.13 | 0.0493 | AT1G67920 |
| 0.00 | 2.04 | 2.20 | 2.12 | 0.0240 | AT3G16530 |
| 0.00 | 2.19 | 2.04 | 2.12 | 0.0226 | AT5G64790 |
| 0.00 | 2.18 | 2.04 | 2.11 | 0.0211 | AT1G07350 |
| 0.00 | 2.15 | 2.08 | 2.11 | 0.0105 | AT3G56200 |
| 0.00 | 2.03 | 2.19 | 2.11 | 0.0241 | AT3G02150 |
| 0.00 | 2.00 | 2.22 | 2.11 | 0.0332 | AT1G78380 |
| 0.00 | 2.15 | 2.06 | 2.11 | 0.0136 | AT3G07090 |
| 0.00 | 2.16 | 2.06 | 2.11 | 0.0151 | AT5G51740 |
| 0.00 | 2.11 | 2.10 | 2.11 | 0.0015 | AT5G55090 |
| 0.00 | 2.27 | 1.94 | 2.10 | 0.0498 | AT3G18773 |
| 0.00 | 2.18 | 2.03 | 2.10 | 0.0227 | AT2G30480 |
| 0.00 | 2.01 | 2.20 | 2.10 | 0.0287 | AT5G55930 |
| 0.00 | 1.99 | 2.21 | 2.10 | 0.0333 | AT1G26770 |
| 0.00 | 2.01 | 2.18 | 2.09 | 0.0258 | AT3G50360 |
| 0.00 | 2.00 | 2.17 | 2.09 | 0.0259 | AT3G62590 |
| 0.00 | 1.95 | 2.22 | 2.09 | 0.0412 | AT4G13180 |
| 0.00 | 1.96 | 2.21 | 2.08 | 0.0381 | AT5G19580 |
| 0.00 | 2.12 | 2.03 | 2.08 | 0.0138 | AT5G60270 |
| 0.00 | 2.20 | 1.95 | 2.08 | 0.0383 | AT3G01085 |
| 0.00 | 2.16 | 1.99 | 2.07 | 0.0261 | AT2G26560 |
| 0.00 | 2.12 | 2.03 | 2.07 | 0.0138 | AT5G27520 |
| 0.00 | 2.18 | 1.96 | 2.07 | 0.0338 | AT3G11170 |
| 0.00 | 2.15 | 1.98 | 2.06 | 0.0262 | AT3G16330 |
| 0.00 | 2.04 | 2.08 | 2.06 | 0.0062 | AT1G18350 |
| 0.00 | 2.10 | 2.01 | 2.06 | 0.0139 | AT2G47000 |
| 0.00 | 2.15 | 1.96 | 2.05 | 0.0294 | AT1G33030 |
| 0.00 | 2.04 | 2.07 | 2.05 | 0.0046 | AT4G25380 |
| 0.00 | 2.04 | 2.06 | 2.05 | 0.0031 | AT3G16040 |
| 0.00 | 2.06 | 2.04 | 2.05 | 0.0031 | AT1G10140 |
| 0.00 | 2.00 | 2.10 | 2.05 | 0.0155 | AT5G13490 |
| 0.00 | 1.89 | 2.21 | 2.05 | 0.0496 | AT2G16060 |
| 0.00 | 1.91 | 2.18 | 2.05 | 0.0420 | AT1G29280 |
| 0.00 | 1.97 | 2.12 | 2.04 | 0.0233 | AT5G03350 |
| 0.00 | 2.20 | 1.89 | 2.04 | 0.0482 | AT2G19310 |
| 0.00 | 2.19 | 1.89 | 2.04 | 0.0467 | AT1G55790 |
| 0.00 | 2.02 | 2.06 | 2.04 | 0.0062 | AT3G01180 |
| 0.00 | 2.01 | 2.07 | 2.04 | 0.0094 | AT5G22570 |
| 0.00 | 2.05 | 2.02 | 2.03 | 0.0047 | AT2G15480 |
| 0.00 | 1.95 | 2.11 | 2.03 | 0.0251 | AT3G55870 |
| 0.00 | 1.89 | 2.17 | 2.03 | 0.0438 | AT3G01620 |
| 0.00 | 2.13 | 1.93 | 2.03 | 0.0313 | AT5G02500 |

|      |       |       |       |        |           |
|------|-------|-------|-------|--------|-----------|
| 0.00 | 2.13  | 1.93  | 2.03  | 0.0313 | AT5G42020 |
| 0.00 | 1.98  | 2.07  | 2.02  | 0.0141 | AT1G30050 |
| 0.00 | 1.89  | 2.16  | 2.02  | 0.0424 | AT1G76190 |
| 0.00 | 1.91  | 2.14  | 2.02  | 0.0361 | AT2G35070 |
| 0.00 | 2.00  | 2.04  | 2.02  | 0.0063 | AT4G04020 |
| 0.00 | 2.00  | 2.03  | 2.02  | 0.0047 | AT3G63010 |
| 0.00 | 1.98  | 2.05  | 2.01  | 0.0111 | AT2G27690 |
| 0.00 | 2.02  | 2.01  | 2.01  | 0.0016 | AT3G22370 |
| 0.00 | 1.95  | 2.07  | 2.01  | 0.0190 | AT3G22235 |
| 0.00 | 1.97  | 2.05  | 2.01  | 0.0127 | AT4G28550 |
| 0.00 | 2.15  | 1.87  | 2.01  | 0.0443 | AT5G47830 |
| 0.00 | 1.93  | 2.08  | 2.01  | 0.0238 | AT5G56760 |
| 0.00 | 2.02  | 1.98  | 2.00  | 0.0064 | AT4G32510 |
| 0.00 | 1.86  | 2.14  | 2.00  | 0.0445 | AT5G24080 |
| 0.00 | 2.04  | 1.96  | 2.00  | 0.0127 | AT4G26780 |
| 0.00 | 2.13  | 1.86  | 2.00  | 0.0430 | AT1G44350 |
| 0.00 | 1.93  | 2.07  | 2.00  | 0.0223 | AT1G60730 |
| 0.00 | -1.92 | -2.07 | -2.00 | 0.0239 | AT1G77200 |
| 0.00 | -2.12 | -1.88 | -2.00 | 0.0382 | AT1G33610 |
| 0.00 | -2.04 | -1.97 | -2.00 | 0.0111 | AT5G23280 |
| 0.00 | -2.11 | -1.90 | -2.01 | 0.0333 | AT1G58270 |
| 0.00 | -1.96 | -2.05 | -2.01 | 0.0143 | AT1G64760 |
| 0.00 | -2.05 | -1.97 | -2.01 | 0.0127 | AT5G56490 |
| 0.00 | -1.92 | -2.10 | -2.01 | 0.0285 | AT3G28220 |
| 0.00 | -1.96 | -2.06 | -2.01 | 0.0158 | AT2G19620 |
| 0.00 | -1.89 | -2.14 | -2.01 | 0.0394 | AT2G45050 |
| 0.00 | -2.13 | -1.90 | -2.01 | 0.0363 | AT4G28720 |
| 0.00 | -2.08 | -1.95 | -2.02 | 0.0205 | AT2G30150 |
| 0.00 | -2.07 | -1.97 | -2.02 | 0.0158 | AT4G08874 |
| 0.00 | -1.97 | -2.07 | -2.02 | 0.0158 | AT5G58400 |
| 0.00 | -1.95 | -2.09 | -2.02 | 0.0221 | AT3G13175 |
| 0.00 | -1.91 | -2.14 | -2.02 | 0.0361 | AT2G40530 |
| 0.00 | -2.03 | -2.03 | -2.03 | 0.0000 | AT2G42200 |
| 0.00 | -2.14 | -1.92 | -2.03 | 0.0345 | AT2G42540 |
| 0.00 | -2.12 | -1.94 | -2.03 | 0.0282 | AT1G30740 |
| 0.00 | -2.13 | -1.94 | -2.03 | 0.0297 | AT5G43020 |
| 0.00 | -2.11 | -1.96 | -2.03 | 0.0235 | AT4G03330 |
| 0.00 | -1.90 | -2.17 | -2.04 | 0.0422 | AT1G77060 |
| 0.00 | -2.09 | -2.01 | -2.05 | 0.0124 | AT1G03170 |
| 0.00 | -2.20 | -1.90 | -2.05 | 0.0465 | AT1G08080 |
| 0.00 | -1.90 | -2.20 | -2.05 | 0.0465 | AT3G48360 |
| 0.00 | -2.00 | -2.10 | -2.05 | 0.0155 | AT3G44350 |
| 0.00 | -1.94 | -2.17 | -2.05 | 0.0356 | AT4G16980 |
| 0.00 | -1.96 | -2.16 | -2.06 | 0.0309 | AT3G53232 |
| 0.00 | -2.01 | -2.13 | -2.07 | 0.0184 | AT1G70390 |
| 0.00 | -1.99 | -2.16 | -2.07 | 0.0261 | AT4G02200 |

|      |       |       |       |        |           |
|------|-------|-------|-------|--------|-----------|
| 0.00 | -1.99 | -2.15 | -2.07 | 0.0246 | AT3G10080 |
| 0.00 | -2.09 | -2.06 | -2.07 | 0.0046 | AT2G26190 |
| 0.00 | -2.15 | -2.00 | -2.08 | 0.0230 | AT2G39855 |
| 0.00 | -2.00 | -2.15 | -2.08 | 0.0230 | AT3G51060 |
| 0.00 | -2.08 | -2.08 | -2.08 | 0.0000 | AT1G74450 |
| 0.00 | -2.04 | -2.13 | -2.08 | 0.0137 | AT5G19530 |
| 0.00 | -2.08 | -2.09 | -2.08 | 0.0015 | AT4G22010 |
| 0.00 | -2.16 | -2.01 | -2.08 | 0.0229 | AT4G02290 |
| 0.00 | -2.09 | -2.09 | -2.09 | 0.0000 | AT3G19380 |
| 0.00 | -1.97 | -2.21 | -2.09 | 0.0365 | AT1G27890 |
| 0.00 | -1.96 | -2.22 | -2.09 | 0.0395 | AT3G10570 |
| 0.00 | -2.13 | -2.05 | -2.09 | 0.0122 | AT5G07030 |
| 0.00 | -2.09 | -2.11 | -2.10 | 0.0030 | AT1G72920 |
| 0.00 | -2.22 | -1.99 | -2.11 | 0.0347 | AT2G34060 |
| 0.00 | -1.97 | -2.25 | -2.11 | 0.0422 | AT1G01380 |
| 0.00 | -2.02 | -2.21 | -2.11 | 0.0286 | AT5G61480 |
| 0.00 | -2.15 | -2.11 | -2.13 | 0.0060 | AT5G03960 |
| 0.00 | -2.06 | -2.19 | -2.13 | 0.0195 | AT1G47655 |
| 0.00 | -2.05 | -2.21 | -2.13 | 0.0239 | AT1G01200 |
| 0.00 | -2.03 | -2.25 | -2.14 | 0.0327 | AT1G15760 |
| 0.00 | -2.14 | -2.14 | -2.14 | 0.0000 | AT3G57920 |
| 0.00 | -2.00 | -2.27 | -2.14 | 0.0402 | AT2G15300 |
| 0.00 | -2.21 | -2.08 | -2.15 | 0.0193 | AT2G22190 |
| 0.00 | -2.23 | -2.07 | -2.15 | 0.0237 | AT3G27200 |
| 0.00 | -2.19 | -2.12 | -2.15 | 0.0103 | AT1G69120 |
| 0.00 | -2.02 | -2.29 | -2.16 | 0.0398 | AT5G21960 |
| 0.00 | -2.10 | -2.21 | -2.16 | 0.0162 | AT4G12690 |
| 0.00 | -2.11 | -2.22 | -2.16 | 0.0162 | AT3G24450 |
| 0.00 | -2.09 | -2.24 | -2.16 | 0.0220 | AT1G52000 |
| 0.00 | -2.13 | -2.21 | -2.17 | 0.0117 | AT1G22550 |
| 0.00 | -2.12 | -2.23 | -2.17 | 0.0161 | AT3G07540 |
| 0.00 | -2.05 | -2.34 | -2.20 | 0.0420 | AT5G12900 |
| 0.00 | -2.06 | -2.36 | -2.21 | 0.0431 | AT5G15580 |
| 0.00 | -2.13 | -2.29 | -2.21 | 0.0230 | AT1G65900 |
| 0.00 | -2.20 | -2.22 | -2.21 | 0.0029 | AT3G24520 |
| 0.00 | -2.21 | -2.23 | -2.22 | 0.0029 | AT1G70740 |
| 0.00 | -2.17 | -2.27 | -2.22 | 0.0143 | AT1G10380 |
| 0.00 | -2.29 | -2.16 | -2.23 | 0.0186 | AT5G16190 |
| 0.00 | -2.26 | -2.20 | -2.23 | 0.0086 | AT4G28703 |
| 0.00 | -2.23 | -2.24 | -2.24 | 0.0014 | AT2G36570 |
| 0.00 | -2.28 | -2.21 | -2.24 | 0.0099 | AT1G06830 |
| 0.00 | -2.14 | -2.36 | -2.25 | 0.0311 | AT1G27770 |
| 0.00 | -2.36 | -2.13 | -2.25 | 0.0326 | AT5G19190 |
| 0.00 | -2.08 | -2.43 | -2.25 | 0.0493 | AT5G45530 |
| 0.00 | -2.11 | -2.41 | -2.26 | 0.0422 | AT2G01420 |
| 0.00 | -2.17 | -2.35 | -2.26 | 0.0253 | AT3G48550 |

|      |       |       |       |        |           |
|------|-------|-------|-------|--------|-----------|
| 0.00 | -2.22 | -2.30 | -2.26 | 0.0113 | AT1G27820 |
| 0.00 | -2.22 | -2.30 | -2.26 | 0.0113 | AT2G46780 |
| 0.00 | -2.26 | -2.27 | -2.26 | 0.0014 | AT2G21050 |
| 0.00 | -2.25 | -2.27 | -2.26 | 0.0028 | AT1G45207 |
| 0.00 | -2.33 | -2.20 | -2.26 | 0.0183 | AT5G34830 |
| 0.00 | -2.27 | -2.27 | -2.27 | 0.0000 | AT2G28950 |
| 0.00 | -2.28 | -2.26 | -2.27 | 0.0028 | AT4G13600 |
| 0.00 | -2.27 | -2.29 | -2.28 | 0.0028 | AT3G57270 |
| 0.00 | -2.26 | -2.31 | -2.29 | 0.0070 | AT5G40630 |
| 0.00 | -2.21 | -2.37 | -2.29 | 0.0222 | AT3G01490 |
| 0.00 | -2.25 | -2.34 | -2.29 | 0.0125 | AT4G02130 |
| 0.00 | -2.21 | -2.39 | -2.30 | 0.0249 | AT1G41830 |
| 0.00 | -2.22 | -2.42 | -2.32 | 0.0274 | AT4G02850 |
| 0.00 | -2.30 | -2.34 | -2.32 | 0.0055 | AT5G20740 |
| 0.00 | -2.21 | -2.43 | -2.32 | 0.0302 | AT4G02170 |
| 0.00 | -2.22 | -2.42 | -2.32 | 0.0274 | AT5G03840 |
| 0.00 | -2.36 | -2.29 | -2.32 | 0.0096 | AT3G56880 |
| 0.00 | -2.30 | -2.38 | -2.34 | 0.0109 | AT1G56430 |
| 0.00 | -2.28 | -2.40 | -2.34 | 0.0163 | AT3G03030 |
| 0.00 | -2.44 | -2.25 | -2.35 | 0.0258 | AT1G11850 |
| 0.00 | -2.21 | -2.49 | -2.35 | 0.0379 | AT5G16030 |
| 0.00 | -2.31 | -2.41 | -2.36 | 0.0135 | AT3G48100 |
| 0.00 | -2.32 | -2.40 | -2.36 | 0.0108 | AT5G44630 |
| 0.00 | -2.29 | -2.45 | -2.37 | 0.0215 | AT5G47380 |
| 0.00 | -2.46 | -2.28 | -2.37 | 0.0242 | AT5G51870 |
| 0.00 | -2.36 | -2.38 | -2.37 | 0.0027 | AT1G63860 |
| 0.00 | -2.34 | -2.41 | -2.38 | 0.0094 | AT4G16140 |
| 0.00 | -2.36 | -2.40 | -2.38 | 0.0053 | AT2G42800 |
| 0.00 | -2.47 | -2.29 | -2.38 | 0.0241 | AT1G33440 |
| 0.00 | -2.21 | -2.55 | -2.38 | 0.0454 | AT1G75500 |
| 0.00 | -2.42 | -2.35 | -2.38 | 0.0093 | AT1G05835 |
| 0.00 | -2.42 | -2.35 | -2.38 | 0.0093 | AT1G56240 |
| 0.00 | -2.36 | -2.41 | -2.39 | 0.0067 | AT4G26890 |
| 0.00 | -2.32 | -2.46 | -2.39 | 0.0186 | AT1G70370 |
| 0.00 | -2.48 | -2.31 | -2.40 | 0.0226 | AT1G74440 |
| 0.00 | -2.23 | -2.57 | -2.40 | 0.0450 | AT5G55750 |
| 0.00 | -2.42 | -2.38 | -2.40 | 0.0053 | AT1G72230 |
| 0.00 | -2.33 | -2.47 | -2.40 | 0.0186 | AT1G49830 |
| 0.00 | -2.46 | -2.34 | -2.40 | 0.0159 | AT4G38400 |
| 0.00 | -2.58 | -2.23 | -2.40 | 0.0462 | AT5G17260 |
| 0.00 | -2.22 | -2.59 | -2.41 | 0.0489 | AT1G11500 |
| 0.00 | -2.56 | -2.26 | -2.41 | 0.0396 | AT4G15670 |
| 0.00 | -2.42 | -2.41 | -2.41 | 0.0013 | AT2G47780 |
| 0.00 | -2.31 | -2.52 | -2.41 | 0.0277 | AT1G78400 |
| 0.00 | -2.34 | -2.52 | -2.43 | 0.0236 | AT3G60670 |
| 0.00 | -2.39 | -2.48 | -2.43 | 0.0118 | AT3G12610 |

|      |       |       |       |        |           |
|------|-------|-------|-------|--------|-----------|
| 0.00 | -2.39 | -2.48 | -2.44 | 0.0118 | AT1G77760 |
| 0.00 | -2.34 | -2.55 | -2.44 | 0.0273 | AT3G05860 |
| 0.00 | -2.41 | -2.47 | -2.44 | 0.0078 | AT1G04330 |
| 0.00 | -2.27 | -2.62 | -2.45 | 0.0455 | AT1G52770 |
| 0.00 | -2.29 | -2.62 | -2.46 | 0.0427 | AT1G73550 |
| 0.00 | -2.46 | -2.45 | -2.46 | 0.0013 | AT1G66180 |
| 0.00 | -2.30 | -2.63 | -2.46 | 0.0426 | AT1G79760 |
| 0.00 | -2.36 | -2.57 | -2.46 | 0.0271 | AT2G41010 |
| 0.00 | -2.63 | -2.30 | -2.47 | 0.0426 | AT5G67450 |
| 0.00 | -2.34 | -2.60 | -2.47 | 0.0335 | AT4G01130 |
| 0.00 | -2.57 | -2.38 | -2.47 | 0.0244 | AT5G08330 |
| 0.00 | -2.47 | -2.49 | -2.48 | 0.0026 | AT5G48900 |
| 0.00 | -2.49 | -2.47 | -2.48 | 0.0026 | AT5G25460 |
| 0.00 | -2.42 | -2.56 | -2.49 | 0.0179 | AT1G75920 |
| 0.00 | -2.42 | -2.55 | -2.49 | 0.0166 | AT1G72910 |
| 0.00 | -2.41 | -2.57 | -2.49 | 0.0204 | AT1G23340 |
| 0.00 | -2.60 | -2.38 | -2.49 | 0.0281 | AT4G00770 |
| 0.00 | -2.40 | -2.58 | -2.49 | 0.0230 | AT2G40610 |
| 0.00 | -2.54 | -2.44 | -2.49 | 0.0128 | AT1G27670 |
| 0.00 | -2.40 | -2.59 | -2.50 | 0.0242 | AT4G17280 |
| 0.00 | -2.46 | -2.53 | -2.50 | 0.0089 | AT1G49500 |
| 0.00 | -2.39 | -2.62 | -2.50 | 0.0292 | AT1G33170 |
| 0.00 | -2.46 | -2.56 | -2.51 | 0.0127 | AT3G45710 |
| 0.00 | -2.68 | -2.34 | -2.51 | 0.0431 | AT4G20670 |
| 0.00 | -2.43 | -2.59 | -2.51 | 0.0203 | AT5G40910 |
| 0.00 | -2.34 | -2.70 | -2.52 | 0.0454 | AT4G14650 |
| 0.00 | -2.48 | -2.56 | -2.52 | 0.0101 | AT5G61850 |
| 0.00 | -2.70 | -2.35 | -2.52 | 0.0441 | AT3G45960 |
| 0.00 | -2.37 | -2.69 | -2.53 | 0.0402 | AT5G40330 |
| 0.00 | -2.47 | -2.59 | -2.53 | 0.0151 | AT2G29290 |
| 0.00 | -2.61 | -2.46 | -2.53 | 0.0188 | AT5G55470 |
| 0.00 | -2.51 | -2.61 | -2.56 | 0.0124 | AT1G67750 |
| 0.00 | -2.57 | -2.54 | -2.56 | 0.0037 | AT4G11000 |
| 0.00 | -2.71 | -2.41 | -2.56 | 0.0373 | AT3G12890 |
| 0.00 | -2.38 | -2.76 | -2.57 | 0.0470 | AT1G54820 |
| 0.00 | -2.60 | -2.63 | -2.61 | 0.0037 | AT1G01600 |
| 0.00 | -2.64 | -2.65 | -2.64 | 0.0012 | AT2G43610 |
| 0.00 | -2.57 | -2.72 | -2.65 | 0.0180 | AT2G01950 |
| 0.00 | -2.50 | -2.84 | -2.67 | 0.0405 | AT5G48490 |
| 0.00 | -2.51 | -2.84 | -2.68 | 0.0392 | AT5G62340 |
| 0.00 | -2.60 | -2.77 | -2.69 | 0.0201 | AT2G30432 |
| 0.00 | -2.66 | -2.71 | -2.69 | 0.0059 | AT4G34220 |
| 0.00 | -2.73 | -2.66 | -2.70 | 0.0083 | AT5G62040 |
| 0.00 | -2.68 | -2.74 | -2.71 | 0.0070 | AT1G09750 |
| 0.00 | -2.84 | -2.60 | -2.72 | 0.0281 | AT3G46130 |
| 0.00 | -2.90 | -2.55 | -2.73 | 0.0408 | AT1G01130 |

|      |       |       |       |        |           |
|------|-------|-------|-------|--------|-----------|
| 0.00 | -2.83 | -2.62 | -2.73 | 0.0245 | AT3G29410 |
| 0.00 | -2.52 | -2.95 | -2.73 | 0.0499 | AT3G58850 |
| 0.00 | -2.94 | -2.54 | -2.74 | 0.0464 | AT2G33000 |
| 0.00 | -2.79 | -2.71 | -2.75 | 0.0093 | AT1G04800 |
| 0.00 | -2.72 | -2.78 | -2.75 | 0.0069 | AT3G45650 |
| 0.00 | -2.80 | -2.71 | -2.76 | 0.0104 | AT4G17490 |
| 0.00 | -2.79 | -2.76 | -2.78 | 0.0034 | AT5G15265 |
| 0.00 | -2.61 | -2.97 | -2.79 | 0.0410 | AT4G19230 |
| 0.00 | -2.86 | -2.81 | -2.83 | 0.0056 | AT3G10720 |
| 0.00 | -2.80 | -2.90 | -2.85 | 0.0112 | AT3G01550 |
| 0.00 | -2.67 | -3.03 | -2.85 | 0.0402 | AT4G32717 |
| 0.00 | -2.89 | -2.88 | -2.88 | 0.0011 | AT5G15780 |
| 0.00 | -3.06 | -2.79 | -2.92 | 0.0294 | AT5G12235 |
| 0.00 | -2.85 | -3.00 | -2.92 | 0.0163 | AT2G28410 |
| 0.00 | -2.87 | -3.02 | -2.94 | 0.0162 | AT5G04150 |
| 0.00 | -2.72 | -3.18 | -2.95 | 0.0495 | AT3G18050 |
| 0.00 | -2.97 | -2.93 | -2.95 | 0.0043 | AT4G15690 |
| 0.00 | -3.06 | -2.98 | -3.02 | 0.0084 | AT2G35640 |
| 0.00 | -3.06 | -3.00 | -3.03 | 0.0063 | AT2G47930 |
| 0.00 | -3.25 | -2.82 | -3.04 | 0.0450 | AT3G52810 |
| 0.00 | -2.85 | -3.24 | -3.04 | 0.0407 | AT2G44930 |
| 0.00 | -2.96 | -3.13 | -3.04 | 0.0178 | AT2G01300 |
| 0.00 | -2.95 | -3.15 | -3.05 | 0.0209 | AT2G20870 |
| 0.00 | -2.86 | -3.29 | -3.08 | 0.0444 | AT3G21945 |
| 0.00 | -2.88 | -3.35 | -3.12 | 0.0479 | AT2G23800 |
| 0.00 | -3.08 | -3.16 | -3.12 | 0.0082 | AT5G33370 |
| 0.00 | -3.28 | -2.97 | -3.12 | 0.0316 | AT3G12710 |
| 0.00 | -3.29 | -2.96 | -3.12 | 0.0336 | AT3G01840 |
| 0.00 | -3.01 | -3.24 | -3.13 | 0.0234 | AT4G02330 |
| 0.00 | -3.15 | -3.12 | -3.13 | 0.0030 | AT1G71450 |
| 0.00 | -2.93 | -3.36 | -3.14 | 0.0435 | AT1G12570 |
| 0.00 | -3.23 | -3.09 | -3.16 | 0.0141 | AT5G02200 |
| 0.00 | -3.13 | -3.27 | -3.20 | 0.0139 | AT1G12845 |
| 0.00 | -3.01 | -3.39 | -3.20 | 0.0378 | AT4G15660 |
| 0.00 | -3.27 | -3.15 | -3.21 | 0.0119 | AT2G31980 |
| 0.00 | -3.26 | -3.15 | -3.21 | 0.0109 | AT2G32885 |
| 0.00 | -3.13 | -3.32 | -3.22 | 0.0187 | AT5G04370 |
| 0.00 | -3.21 | -3.25 | -3.23 | 0.0039 | AT3G59310 |
| 0.00 | -3.21 | -3.26 | -3.24 | 0.0049 | AT3G43083 |
| 0.00 | -3.25 | -3.36 | -3.31 | 0.0106 | AT5G63090 |
| 0.00 | -3.13 | -3.49 | -3.31 | 0.0346 | AT1G66100 |
| 0.00 | -3.26 | -3.36 | -3.31 | 0.0096 | AT4G15680 |
| 0.00 | -3.06 | -3.56 | -3.31 | 0.0480 | AT2G42990 |
| 0.00 | -3.12 | -3.51 | -3.31 | 0.0374 | AT5G45340 |
| 0.00 | -3.06 | -3.58 | -3.32 | 0.0498 | AT1G66760 |
| 0.00 | -3.39 | -3.25 | -3.32 | 0.0134 | AT1G01190 |

|      |       |       |       |        |           |
|------|-------|-------|-------|--------|-----------|
| 0.00 | -3.27 | -3.37 | -3.32 | 0.0096 | AT3G10600 |
| 0.00 | -3.36 | -3.29 | -3.33 | 0.0067 | AT5G22380 |
| 0.00 | -3.30 | -3.37 | -3.34 | 0.0067 | AT5G42290 |
| 0.00 | -3.20 | -3.56 | -3.38 | 0.0339 | AT4G08040 |
| 0.00 | -3.55 | -3.21 | -3.38 | 0.0320 | AT3G17520 |
| 0.00 | -3.42 | -3.35 | -3.38 | 0.0066 | AT1G15360 |
| 0.00 | -3.31 | -3.46 | -3.39 | 0.0141 | AT3G46880 |
| 0.00 | -3.48 | -3.32 | -3.40 | 0.0150 | AT5G38000 |
| 0.00 | -3.17 | -3.63 | -3.40 | 0.0430 | AT1G17700 |
| 0.00 | -3.35 | -3.53 | -3.44 | 0.0167 | AT3G54000 |
| 0.00 | -3.43 | -3.47 | -3.45 | 0.0037 | AT1G63030 |
| 0.00 | -3.56 | -3.35 | -3.45 | 0.0193 | AT1G06350 |
| 0.00 | -3.60 | -3.36 | -3.48 | 0.0219 | AT1G23600 |
| 0.00 | -3.54 | -3.49 | -3.52 | 0.0045 | AT2G10940 |
| 0.00 | -3.57 | -3.50 | -3.53 | 0.0063 | AT5G55450 |
| 0.00 | -3.39 | -3.70 | -3.54 | 0.0278 | AT5G15230 |
| 0.00 | -3.51 | -3.70 | -3.60 | 0.0168 | AT5G20630 |
| 0.00 | -3.60 | -3.63 | -3.62 | 0.0026 | AT5G12940 |
| 0.00 | -3.63 | -3.75 | -3.69 | 0.0104 | AT2G29130 |
| 0.00 | -3.45 | -3.95 | -3.70 | 0.0429 | AT1G33760 |
| 0.00 | -3.75 | -3.85 | -3.80 | 0.0084 | AT4G25470 |
| 0.00 | -3.79 | -3.87 | -3.83 | 0.0066 | AT3G11825 |
| 0.00 | -4.13 | -3.64 | -3.88 | 0.0401 | AT5G18430 |
| 0.00 | -3.88 | -3.98 | -3.93 | 0.0081 | AT1G80660 |
| 0.00 | -3.81 | -4.27 | -4.04 | 0.0362 | AT1G02810 |
| 0.00 | -3.86 | -4.22 | -4.04 | 0.0283 | AT5G22430 |
| 0.00 | -4.15 | -3.95 | -4.05 | 0.0157 | AT5G61605 |
| 0.00 | -4.14 | -4.06 | -4.10 | 0.0062 | AT2G28405 |
| 0.00 | -4.07 | -4.18 | -4.12 | 0.0085 | AT5G55720 |
| 0.00 | -4.12 | -4.16 | -4.14 | 0.0031 | AT3G19200 |
| 0.00 | -3.92 | -4.36 | -4.14 | 0.0338 | AT5G07560 |
| 0.00 | -4.17 | -4.12 | -4.14 | 0.0038 | AT1G14480 |
| 0.00 | -4.07 | -4.28 | -4.18 | 0.0160 | AT2G28190 |
| 0.00 | -4.50 | -4.26 | -4.38 | 0.0174 | AT5G51190 |
| 0.00 | -4.30 | -4.60 | -4.45 | 0.0215 | AT2G28355 |
| 0.00 | -4.34 | -4.57 | -4.45 | 0.0164 | AT3G09870 |
| 0.00 | -4.53 | -4.56 | -4.54 | 0.0021 | AT5G10100 |
| 0.00 | -4.66 | -4.62 | -4.64 | 0.0027 | AT2G24610 |
| 0.00 | -4.43 | -4.93 | -4.68 | 0.0340 | AT3G54070 |
| 0.00 | -4.62 | -4.86 | -4.74 | 0.0161 | AT5G37940 |
| 0.00 | -5.17 | -5.03 | -5.10 | 0.0087 | AT5G07530 |
| 0.00 | -4.91 | -5.67 | -5.29 | 0.0457 | AT1G66850 |
| 0.00 | -5.09 | -5.54 | -5.32 | 0.0269 | AT4G25490 |
| 0.00 | -6.05 | -5.97 | -6.01 | 0.0042 | AT5G07550 |



**Supplementary material 5: List of up- and down-regulated genes (HE-6D-WL vs WT-6D-WL) with their normalized fold induction and adjusted p value**

| Normalized Fold WT-6D-WL | Fold OE-6D-WL 1 | Fold OE-6D-WL 2 | Normalized Fold OE-6D-WL | Adjusted P value | Gene ID   |
|--------------------------|-----------------|-----------------|--------------------------|------------------|-----------|
| 0.00                     | 6.93            | 7.00            | 6.97                     | 0.0032           | AT3G12000 |
| 0.00                     | 6.83            | 6.41            | 6.62                     | 0.0202           | AT4G11180 |
| 0.00                     | 6.99            | 6.08            | 6.54                     | 0.0443           | AT1G53130 |
| 0.00                     | 6.41            | 6.63            | 6.52                     | 0.0107           | AT3G04290 |
| 0.00                     | 6.39            | 6.33            | 6.36                     | 0.0030           | AT5G38910 |
| 0.00                     | 6.45            | 5.67            | 6.06                     | 0.0409           | AT1G11600 |
| 0.00                     | 6.07            | 6.02            | 6.04                     | 0.0026           | AT4G11320 |
| 0.00                     | 6.17            | 5.65            | 5.91                     | 0.0280           | AT1G72290 |
| 0.00                     | 5.94            | 5.47            | 5.71                     | 0.0262           | AT3G11430 |
| 0.00                     | 5.15            | 5.58            | 5.37                     | 0.0255           | AT4G23680 |
| 0.00                     | 5.61            | 4.98            | 5.30                     | 0.0378           | AT1G26945 |
| 0.00                     | 5.59            | 4.81            | 5.20                     | 0.0477           | AT4G30180 |
| 0.00                     | 5.12            | 5.22            | 5.17                     | 0.0062           | AT2G14690 |
| 0.00                     | 4.90            | 5.43            | 5.16                     | 0.0326           | AT5G47600 |
| 0.00                     | 4.90            | 5.21            | 5.06                     | 0.0195           | AT5G45950 |
| 0.00                     | 5.37            | 4.68            | 5.03                     | 0.0436           | AT4G19430 |
| 0.00                     | 5.07            | 4.70            | 4.89                     | 0.0241           | AT1G17180 |
| 0.00                     | 5.21            | 4.49            | 4.85                     | 0.0472           | AT5G22430 |
| 0.00                     | 5.08            | 4.39            | 4.74                     | 0.0463           | AT2G18620 |
| 0.00                     | 4.62            | 4.82            | 4.72                     | 0.0135           | AT1G11850 |
| 0.00                     | 4.64            | 4.59            | 4.62                     | 0.0034           | AT2G24210 |
| 0.00                     | 4.47            | 4.28            | 4.37                     | 0.0138           | AT1G24130 |
| 0.00                     | 4.29            | 4.32            | 4.30                     | 0.0022           | AT5G08000 |
| 0.00                     | 3.91            | 4.50            | 4.21                     | 0.0446           | AT1G22760 |
| 0.00                     | 4.27            | 4.01            | 4.14                     | 0.0200           | AT5G20630 |
| 0.00                     | 3.89            | 4.21            | 4.05                     | 0.0251           | AT5G44300 |
| 0.00                     | 4.16            | 3.81            | 3.98                     | 0.0279           | AT1G66120 |
| 0.00                     | 3.82            | 4.13            | 3.98                     | 0.0248           | AT4G10260 |
| 0.00                     | 3.70            | 4.21            | 3.96                     | 0.0410           | AT1G31310 |
| 0.00                     | 3.90            | 3.96            | 3.93                     | 0.0049           | AT1G28170 |
| 0.00                     | 3.61            | 4.17            | 3.89                     | 0.0457           | AT3G28220 |
| 0.00                     | 3.97            | 3.75            | 3.86                     | 0.0181           | AT5G59040 |
| 0.00                     | 4.13            | 3.55            | 3.84                     | 0.0480           | AT3G59610 |
| 0.00                     | 3.75            | 3.91            | 3.83                     | 0.0133           | AT5G24780 |
| 0.00                     | 4.00            | 3.59            | 3.80                     | 0.0344           | AT4G32714 |
| 0.00                     | 3.80            | 3.64            | 3.72                     | 0.0137           | AT1G23200 |
| 0.00                     | 3.49            | 3.83            | 3.66                     | 0.0295           | AT1G52690 |
| 0.00                     | 3.69            | 3.61            | 3.65                     | 0.0070           | AT5G53680 |
| 0.00                     | 3.64            | 3.65            | 3.65                     | 0.0009           | AT4G36610 |
| 0.00                     | 3.39            | 3.66            | 3.53                     | 0.0244           | AT2G10940 |

|      |      |      |      |        |           |
|------|------|------|------|--------|-----------|
| 0.00 | 3.46 | 3.56 | 3.51 | 0.0091 | AT3G27810 |
| 0.00 | 3.67 | 3.27 | 3.47 | 0.0367 | AT5G25330 |
| 0.00 | 3.22 | 3.65 | 3.43 | 0.0398 | AT5G12460 |
| 0.00 | 3.16 | 3.69 | 3.43 | 0.0492 | AT3G08900 |
| 0.00 | 3.52 | 3.33 | 3.42 | 0.0177 | AT3G03240 |
| 0.00 | 3.67 | 3.14 | 3.41 | 0.0494 | AT5G53390 |
| 0.00 | 3.63 | 3.16 | 3.40 | 0.0440 | AT4G29305 |
| 0.00 | 3.40 | 3.35 | 3.38 | 0.0047 | AT1G19320 |
| 0.00 | 3.09 | 3.53 | 3.31 | 0.0423 | AT2G38530 |
| 0.00 | 3.03 | 3.54 | 3.29 | 0.0493 | AT2G23400 |
| 0.00 | 3.10 | 3.47 | 3.28 | 0.0358 | AT1G25340 |
| 0.00 | 3.20 | 3.34 | 3.27 | 0.0136 | AT5G65730 |
| 0.00 | 3.22 | 3.27 | 3.25 | 0.0049 | AT4G13790 |
| 0.00 | 3.42 | 3.01 | 3.22 | 0.0405 | AT5G40420 |
| 0.00 | 3.17 | 3.25 | 3.21 | 0.0079 | AT3G47350 |
| 0.00 | 3.03 | 3.38 | 3.21 | 0.0347 | AT3G17760 |
| 0.00 | 3.26 | 3.09 | 3.17 | 0.0170 | AT5G25460 |
| 0.00 | 3.18 | 3.16 | 3.17 | 0.0020 | AT1G70970 |
| 0.00 | 3.35 | 2.99 | 3.17 | 0.0361 | AT5G50335 |
| 0.00 | 3.30 | 3.03 | 3.17 | 0.0271 | AT5G37810 |
| 0.00 | 2.93 | 3.38 | 3.16 | 0.0453 | AT2G16580 |
| 0.00 | 3.35 | 2.92 | 3.14 | 0.0436 | AT4G18320 |
| 0.00 | 3.21 | 3.00 | 3.10 | 0.0215 | AT2G23060 |
| 0.00 | 2.96 | 3.20 | 3.08 | 0.0248 | AT1G28700 |
| 0.00 | 3.04 | 3.11 | 3.07 | 0.0072 | AT5G03620 |
| 0.00 | 2.91 | 3.21 | 3.06 | 0.0312 | AT1G31530 |
| 0.00 | 2.99 | 3.12 | 3.05 | 0.0135 | AT4G38860 |
| 0.00 | 2.97 | 3.14 | 3.05 | 0.0177 | AT5G61850 |
| 0.00 | 2.88 | 3.19 | 3.04 | 0.0325 | AT1G19640 |
| 0.00 | 3.11 | 2.95 | 3.03 | 0.0168 | AT1G80080 |
| 0.00 | 2.90 | 3.13 | 3.01 | 0.0243 | AT4G15620 |
| 0.00 | 3.08 | 2.93 | 3.01 | 0.0159 | AT2G34315 |
| 0.00 | 2.96 | 2.99 | 2.98 | 0.0032 | AT4G20670 |
| 0.00 | 3.01 | 2.93 | 2.97 | 0.0086 | AT3G47340 |
| 0.00 | 2.83 | 3.08 | 2.96 | 0.0269 | AT2G46870 |
| 0.00 | 2.87 | 2.99 | 2.93 | 0.0130 | AT5G63225 |
| 0.00 | 3.06 | 2.74 | 2.90 | 0.0351 | AT1G07340 |
| 0.00 | 3.06 | 2.70 | 2.88 | 0.0397 | AT4G39760 |
| 0.00 | 3.05 | 2.71 | 2.88 | 0.0375 | AT5G17340 |
| 0.00 | 2.89 | 2.84 | 2.86 | 0.0056 | AT1G26796 |
| 0.00 | 2.94 | 2.78 | 2.86 | 0.0178 | AT3G61840 |
| 0.00 | 2.90 | 2.80 | 2.85 | 0.0112 | AT4G27330 |
| 0.00 | 2.64 | 3.06 | 2.85 | 0.0468 | AT2G32530 |
| 0.00 | 2.78 | 2.90 | 2.84 | 0.0134 | AT5G20240 |
| 0.00 | 2.95 | 2.66 | 2.81 | 0.0329 | AT2G40610 |
| 0.00 | 2.83 | 2.78 | 2.80 | 0.0057 | AT3G02640 |

|      |      |      |      |        |           |
|------|------|------|------|--------|-----------|
| 0.00 | 2.98 | 2.61 | 2.79 | 0.0421 | AT2G14620 |
| 0.00 | 2.83 | 2.75 | 2.79 | 0.0091 | AT1G02810 |
| 0.00 | 2.89 | 2.65 | 2.77 | 0.0276 | AT1G15160 |
| 0.00 | 2.57 | 2.97 | 2.77 | 0.0459 | AT3G49580 |
| 0.00 | 2.81 | 2.69 | 2.75 | 0.0139 | AT5G38080 |
| 0.00 | 2.66 | 2.84 | 2.75 | 0.0208 | AT1G61090 |
| 0.00 | 2.86 | 2.64 | 2.75 | 0.0255 | AT3G23730 |
| 0.00 | 2.71 | 2.78 | 2.74 | 0.0081 | AT4G28365 |
| 0.00 | 2.78 | 2.71 | 2.74 | 0.0081 | AT1G49810 |
| 0.00 | 2.66 | 2.82 | 2.74 | 0.0186 | AT3G44250 |
| 0.00 | 2.91 | 2.56 | 2.73 | 0.0407 | AT5G11130 |
| 0.00 | 2.67 | 2.79 | 2.73 | 0.0140 | AT1G27461 |
| 0.00 | 2.93 | 2.52 | 2.73 | 0.0478 | AT1G77830 |
| 0.00 | 2.71 | 2.72 | 2.71 | 0.0012 | AT1G27220 |
| 0.00 | 2.61 | 2.80 | 2.70 | 0.0223 | AT1G66850 |
| 0.00 | 2.56 | 2.80 | 2.68 | 0.0285 | AT1G30950 |
| 0.00 | 2.68 | 2.67 | 2.68 | 0.0012 | AT1G02065 |
| 0.00 | 2.55 | 2.76 | 2.66 | 0.0252 | AT1G75880 |
| 0.00 | 2.48 | 2.82 | 2.65 | 0.0408 | AT1G26390 |
| 0.00 | 2.72 | 2.55 | 2.63 | 0.0205 | AT3G18360 |
| 0.00 | 2.66 | 2.60 | 2.63 | 0.0073 | AT5G20820 |
| 0.00 | 2.47 | 2.78 | 2.63 | 0.0375 | AT3G06220 |
| 0.00 | 2.55 | 2.68 | 2.61 | 0.0158 | AT4G10490 |
| 0.00 | 2.40 | 2.81 | 2.61 | 0.0500 | AT1G13420 |
| 0.00 | 2.58 | 2.61 | 2.60 | 0.0037 | AT4G23380 |
| 0.00 | 2.46 | 2.74 | 2.60 | 0.0342 | AT5G51210 |
| 0.00 | 2.48 | 2.70 | 2.59 | 0.0270 | AT5G27200 |
| 0.00 | 2.42 | 2.76 | 2.59 | 0.0417 | AT4G22810 |
| 0.00 | 2.58 | 2.58 | 2.58 | 0.0000 | AT3G21830 |
| 0.00 | 2.74 | 2.41 | 2.57 | 0.0407 | AT1G60470 |
| 0.00 | 2.71 | 2.41 | 2.56 | 0.0373 | AT5G07500 |
| 0.00 | 2.61 | 2.49 | 2.55 | 0.0150 | AT1G69530 |
| 0.00 | 2.61 | 2.49 | 2.55 | 0.0150 | AT1G12805 |
| 0.00 | 2.71 | 2.39 | 2.55 | 0.0399 | AT1G29490 |
| 0.00 | 2.42 | 2.67 | 2.55 | 0.0312 | AT4G30230 |
| 0.00 | 2.46 | 2.63 | 2.55 | 0.0213 | AT3G21840 |
| 0.00 | 2.40 | 2.66 | 2.53 | 0.0327 | AT4G39590 |
| 0.00 | 2.58 | 2.47 | 2.52 | 0.0139 | AT5G48100 |
| 0.00 | 2.56 | 2.46 | 2.51 | 0.0127 | AT2G02540 |
| 0.00 | 2.60 | 2.42 | 2.51 | 0.0228 | AT2G16060 |
| 0.00 | 2.60 | 2.41 | 2.50 | 0.0241 | AT5G18020 |
| 0.00 | 2.59 | 2.42 | 2.50 | 0.0216 | AT4G02330 |
| 0.00 | 2.52 | 2.48 | 2.50 | 0.0051 | AT3G45248 |
| 0.00 | 2.46 | 2.53 | 2.49 | 0.0089 | AT1G04250 |
| 0.00 | 2.38 | 2.60 | 2.49 | 0.0281 | AT1G52695 |
| 0.00 | 2.47 | 2.50 | 2.49 | 0.0038 | AT1G53285 |

|      |      |      |      |        |           |
|------|------|------|------|--------|-----------|
| 0.00 | 2.33 | 2.64 | 2.48 | 0.0397 | AT4G12825 |
| 0.00 | 2.52 | 2.44 | 2.48 | 0.0103 | AT2G41280 |
| 0.00 | 2.60 | 2.34 | 2.47 | 0.0335 | AT1G70560 |
| 0.00 | 2.43 | 2.50 | 2.46 | 0.0090 | AT3G50010 |
| 0.00 | 2.46 | 2.46 | 2.46 | 0.0000 | AT1G68570 |
| 0.00 | 2.28 | 2.62 | 2.45 | 0.0441 | AT1G05835 |
| 0.00 | 2.53 | 2.37 | 2.45 | 0.0208 | AT1G26795 |
| 0.00 | 2.35 | 2.52 | 2.43 | 0.0222 | AT2G10535 |
| 0.00 | 2.47 | 2.39 | 2.43 | 0.0105 | AT3G23130 |
| 0.00 | 2.49 | 2.33 | 2.41 | 0.0211 | AT5G36770 |
| 0.00 | 2.29 | 2.52 | 2.40 | 0.0304 | AT5G51490 |
| 0.00 | 2.47 | 2.34 | 2.40 | 0.0172 | AT5G06839 |
| 0.00 | 2.27 | 2.54 | 2.40 | 0.0357 | AT4G21690 |
| 0.00 | 2.32 | 2.49 | 2.40 | 0.0225 | AT5G08250 |
| 0.00 | 2.27 | 2.52 | 2.39 | 0.0332 | AT4G15090 |
| 0.00 | 2.48 | 2.31 | 2.39 | 0.0226 | AT2G45830 |
| 0.00 | 2.35 | 2.43 | 2.39 | 0.0107 | AT5G59720 |
| 0.00 | 2.41 | 2.37 | 2.39 | 0.0053 | AT4G31910 |
| 0.00 | 2.53 | 2.24 | 2.38 | 0.0387 | AT4G33560 |
| 0.00 | 2.38 | 2.38 | 2.38 | 0.0000 | AT1G02575 |
| 0.00 | 2.23 | 2.54 | 2.38 | 0.0413 | AT3G24690 |
| 0.00 | 2.38 | 2.37 | 2.38 | 0.0013 | AT2G43050 |
| 0.00 | 2.45 | 2.29 | 2.37 | 0.0215 | AT3G12145 |
| 0.00 | 2.52 | 2.22 | 2.37 | 0.0402 | AT3G12470 |
| 0.00 | 2.49 | 2.24 | 2.37 | 0.0336 | AT1G21910 |
| 0.00 | 2.42 | 2.31 | 2.36 | 0.0148 | AT3G60780 |
| 0.00 | 2.22 | 2.50 | 2.36 | 0.0377 | AT4G10250 |
| 0.00 | 2.38 | 2.33 | 2.36 | 0.0068 | AT5G49100 |
| 0.00 | 2.41 | 2.30 | 2.36 | 0.0149 | AT4G12500 |
| 0.00 | 2.48 | 2.23 | 2.36 | 0.0338 | AT1G23570 |
| 0.00 | 2.47 | 2.20 | 2.34 | 0.0368 | AT5G17700 |
| 0.00 | 2.35 | 2.32 | 2.34 | 0.0041 | AT1G78160 |
| 0.00 | 2.48 | 2.17 | 2.33 | 0.0424 | AT2G45610 |
| 0.00 | 2.32 | 2.34 | 2.33 | 0.0027 | AT4G12490 |
| 0.00 | 2.34 | 2.29 | 2.32 | 0.0069 | AT5G18050 |
| 0.00 | 2.13 | 2.48 | 2.31 | 0.0482 | AT4G35160 |
| 0.00 | 2.31 | 2.26 | 2.28 | 0.0070 | AT5G23020 |
| 0.00 | 2.34 | 2.22 | 2.28 | 0.0167 | AT4G32490 |
| 0.00 | 2.29 | 2.25 | 2.27 | 0.0056 | AT5G18080 |
| 0.00 | 2.10 | 2.43 | 2.26 | 0.0463 | AT3G12870 |
| 0.00 | 2.23 | 2.29 | 2.26 | 0.0085 | AT1G61095 |
| 0.00 | 2.18 | 2.32 | 2.25 | 0.0198 | AT5G10140 |
| 0.00 | 2.26 | 2.24 | 2.25 | 0.0028 | AT4G13700 |
| 0.00 | 2.19 | 2.31 | 2.25 | 0.0170 | AT1G61093 |
| 0.00 | 2.26 | 2.24 | 2.25 | 0.0028 | AT4G30880 |
| 0.00 | 2.10 | 2.39 | 2.24 | 0.0411 | AT1G66430 |

|      |      |      |      |        |           |
|------|------|------|------|--------|-----------|
| 0.00 | 2.21 | 2.28 | 2.24 | 0.0099 | AT5G01075 |
| 0.00 | 2.32 | 2.16 | 2.24 | 0.0227 | AT3G17070 |
| 0.00 | 2.34 | 2.14 | 2.24 | 0.0284 | AT3G42725 |
| 0.00 | 2.14 | 2.33 | 2.24 | 0.0270 | AT5G07160 |
| 0.00 | 2.29 | 2.18 | 2.23 | 0.0157 | AT5G16250 |
| 0.00 | 2.17 | 2.30 | 2.23 | 0.0185 | AT2G17470 |
| 0.00 | 2.25 | 2.21 | 2.23 | 0.0057 | AT4G08950 |
| 0.00 | 2.15 | 2.28 | 2.22 | 0.0187 | AT4G24275 |
| 0.00 | 2.21 | 2.21 | 2.21 | 0.0000 | AT4G01140 |
| 0.00 | 2.14 | 2.28 | 2.21 | 0.0202 | AT2G22805 |
| 0.00 | 2.26 | 2.14 | 2.20 | 0.0174 | AT4G32100 |
| 0.00 | 2.31 | 2.09 | 2.20 | 0.0318 | AT5G07200 |
| 0.00 | 2.05 | 2.34 | 2.19 | 0.0420 | AT5G38960 |
| 0.00 | 2.20 | 2.19 | 2.19 | 0.0015 | AT2G17723 |
| 0.00 | 2.08 | 2.31 | 2.19 | 0.0333 | AT3G05980 |
| 0.00 | 2.13 | 2.23 | 2.18 | 0.0146 | AT5G50770 |
| 0.00 | 2.09 | 2.27 | 2.18 | 0.0263 | AT1G63060 |
| 0.00 | 2.18 | 2.17 | 2.17 | 0.0015 | AT1G70440 |
| 0.00 | 2.25 | 2.10 | 2.17 | 0.0219 | AT4G38660 |
| 0.00 | 2.14 | 2.20 | 2.17 | 0.0088 | AT4G01500 |
| 0.00 | 2.31 | 2.04 | 2.17 | 0.0395 | AT1G54560 |
| 0.00 | 2.10 | 2.24 | 2.17 | 0.0205 | AT2G43386 |
| 0.00 | 2.29 | 2.03 | 2.16 | 0.0383 | AT1G15150 |
| 0.00 | 2.06 | 2.25 | 2.16 | 0.0280 | AT1G75640 |
| 0.00 | 2.28 | 2.02 | 2.15 | 0.0384 | AT1G26250 |
| 0.00 | 2.27 | 2.03 | 2.15 | 0.0355 | AT1G26799 |
| 0.00 | 2.08 | 2.22 | 2.15 | 0.0207 | AT4G34760 |
| 0.00 | 2.29 | 2.00 | 2.14 | 0.0430 | AT3G54400 |
| 0.00 | 2.23 | 2.05 | 2.14 | 0.0268 | AT5G09970 |
| 0.00 | 2.02 | 2.26 | 2.14 | 0.0357 | AT2G16300 |
| 0.00 | 2.13 | 2.15 | 2.14 | 0.0030 | AT5G13170 |
| 0.00 | 2.16 | 2.11 | 2.13 | 0.0075 | AT3G03820 |
| 0.00 | 2.04 | 2.22 | 2.13 | 0.0269 | AT3G55660 |
| 0.00 | 2.14 | 2.12 | 2.13 | 0.0030 | AT5G12940 |
| 0.00 | 2.00 | 2.24 | 2.12 | 0.0360 | AT1G22110 |
| 0.00 | 2.11 | 2.13 | 2.12 | 0.0030 | AT1G29450 |
| 0.00 | 2.19 | 2.02 | 2.11 | 0.0257 | AT3G17130 |
| 0.00 | 2.10 | 2.11 | 2.11 | 0.0015 | AT3G14210 |
| 0.00 | 2.24 | 1.95 | 2.10 | 0.0440 | AT4G38850 |
| 0.00 | 2.05 | 2.14 | 2.09 | 0.0137 | AT1G43666 |
| 0.00 | 1.98 | 2.20 | 2.09 | 0.0335 | AT3G06840 |
| 0.00 | 2.11 | 2.06 | 2.09 | 0.0076 | AT4G35170 |
| 0.00 | 2.07 | 2.09 | 2.08 | 0.0031 | AT5G39560 |
| 0.00 | 1.97 | 2.19 | 2.08 | 0.0336 | AT3G21910 |
| 0.00 | 2.11 | 2.04 | 2.07 | 0.0107 | AT5G57920 |
| 0.00 | 1.99 | 2.16 | 2.07 | 0.0261 | AT2G42900 |

|      |       |       |       |        |           |
|------|-------|-------|-------|--------|-----------|
| 0.00 | 1.96  | 2.16  | 2.06  | 0.0309 | AT1G65450 |
| 0.00 | 2.19  | 1.93  | 2.06  | 0.0401 | AT3G25750 |
| 0.00 | 1.95  | 2.16  | 2.06  | 0.0325 | AT1G48930 |
| 0.00 | 2.18  | 1.93  | 2.06  | 0.0387 | AT5G07030 |
| 0.00 | 2.11  | 2.00  | 2.06  | 0.0170 | AT1G65610 |
| 0.00 | 1.97  | 2.14  | 2.05  | 0.0263 | AT4G38000 |
| 0.00 | 2.02  | 2.06  | 2.04  | 0.0062 | AT1G78950 |
| 0.00 | 1.99  | 2.09  | 2.04  | 0.0156 | AT1G07476 |
| 0.00 | 2.03  | 2.05  | 2.04  | 0.0031 | AT1G44414 |
| 0.00 | 2.01  | 2.06  | 2.04  | 0.0078 | AT2G43610 |
| 0.00 | 1.96  | 2.11  | 2.04  | 0.0235 | AT2G36790 |
| 0.00 | 1.89  | 2.18  | 2.03  | 0.0453 | AT2G32610 |
| 0.00 | 1.97  | 2.09  | 2.03  | 0.0188 | AT4G27810 |
| 0.00 | 1.89  | 2.17  | 2.03  | 0.0438 | AT3G23167 |
| 0.00 | 1.89  | 2.16  | 2.02  | 0.0424 | AT5G05810 |
| 0.00 | 2.13  | 1.92  | 2.02  | 0.0330 | AT1G62340 |
| 0.00 | 2.12  | 1.92  | 2.02  | 0.0315 | AT4G33660 |
| 0.00 | 2.01  | 2.03  | 2.02  | 0.0032 | AT4G28950 |
| 0.00 | 1.96  | 2.08  | 2.02  | 0.0189 | AT1G17170 |
| 0.00 | 2.03  | 2.00  | 2.02  | 0.0047 | AT5G65370 |
| 0.00 | 1.95  | 2.08  | 2.01  | 0.0205 | AT1G53520 |
| 0.00 | 1.86  | 2.17  | 2.01  | 0.0489 | AT5G37473 |
| 0.00 | 1.94  | 2.08  | 2.01  | 0.0222 | AT2G03770 |
| 0.00 | 2.10  | 1.91  | 2.00  | 0.0301 | AT3G26140 |
| 0.00 | 1.99  | 2.01  | 2.00  | 0.0032 | AT2G44240 |
| 0.00 | 2.12  | 1.88  | 2.00  | 0.0382 | AT2G34700 |
| 0.00 | 1.91  | 2.08  | 2.00  | 0.0271 | AT2G27385 |
| 0.00 | -2.01 | -2.00 | -2.00 | 0.0357 | AT5G37478 |
| 0.00 | -2.12 | -1.92 | -2.02 | 0.0251 | AT1G29720 |
| 0.00 | -1.89 | -2.16 | -2.02 | 0.0029 | AT1G30860 |
| 0.00 | -2.05 | -2.00 | -2.02 | 0.0031 | AT4G34600 |
| 0.00 | -2.22 | -1.85 | -2.03 | 0.0177 | AT1G69970 |
| 0.00 | -2.05 | -2.03 | -2.04 | 0.0392 | AT5G61040 |
| 0.00 | -1.96 | -2.12 | -2.04 | 0.0160 | AT2G15320 |
| 0.00 | -2.05 | -2.05 | -2.05 | 0.0270 | AT1G48970 |
| 0.00 | -1.94 | -2.19 | -2.06 | 0.0236 | AT1G17455 |
| 0.00 | -2.34 | -1.79 | -2.07 | 0.0162 | AT4G21930 |
| 0.00 | -2.03 | -2.11 | -2.07 | 0.0371 | AT2G07728 |
| 0.00 | -2.26 | -1.92 | -2.09 | 0.0062 | AT1G13609 |
| 0.00 | -1.92 | -2.30 | -2.11 | 0.0118 | AT5G54225 |
| 0.00 | -1.13 | -3.11 | -2.12 | 0.0441 | AT4G04740 |
| 0.00 | -1.93 | -2.33 | -2.13 | 0.0106 | AT3G01680 |
| 0.00 | -1.77 | -2.55 | -2.16 | 0.0185 | AT1G17940 |
| 0.00 | -2.13 | -2.23 | -2.18 | 0.0317 | AT5G44660 |
| 0.00 | -2.37 | -2.00 | -2.18 | 0.0023 | AT5G62940 |
| 0.00 | -2.90 | -1.53 | -2.21 | 0.0311 | AT4G08874 |

|      |       |       |       |        |           |
|------|-------|-------|-------|--------|-----------|
| 0.00 | -2.00 | -2.49 | -2.24 | 0.0211 | AT3G04450 |
| 0.00 | -2.14 | -2.35 | -2.25 | 0.0099 | AT1G18730 |
| 0.00 | -2.38 | -2.12 | -2.25 | 0.0148 | AT4G32785 |
| 0.00 | -2.03 | -2.48 | -2.25 | 0.0358 | AT1G73390 |
| 0.00 | -2.26 | -2.38 | -2.32 | 0.0433 | AT5G06610 |
| 0.00 | -2.88 | -1.81 | -2.35 | 0.0185 | AT2G32290 |
| 0.00 | -2.39 | -2.55 | -2.47 | 0.0029 | AT2G45900 |
| 0.00 | -2.14 | -2.81 | -2.48 | 0.0081 | AT5G48110 |
| 0.00 | -2.29 | -2.70 | -2.49 | 0.0185 | AT5G64905 |
| 0.00 | -2.75 | -2.25 | -2.50 | 0.0090 | AT1G27620 |
| 0.00 | -2.63 | -2.47 | -2.55 | 0.0205 | AT5G64910 |
| 0.00 | -3.02 | -2.15 | -2.58 | 0.0163 | AT5G24990 |
| 0.00 | -2.40 | -2.78 | -2.59 | 0.0442 | AT2G22980 |
| 0.00 | -2.63 | -2.57 | -2.60 | 0.0000 | AT4G39650 |
| 0.00 | -2.84 | -2.44 | -2.64 | 0.0374 | AT4G37150 |
| 0.00 | -2.72 | -2.58 | -2.65 | 0.0147 | AT3G27027 |
| 0.00 | -2.46 | -2.95 | -2.70 | 0.0409 | AT3G01860 |
| 0.00 | -2.52 | -2.90 | -2.71 | 0.0381 | AT1G54445 |
| 0.00 | -1.53 | -3.92 | -2.73 | 0.0448 | AT5G10970 |
| 0.00 | -2.93 | -2.56 | -2.75 | 0.0000 | AT1G69080 |
| 0.00 | -2.92 | -2.57 | -2.75 | 0.0159 | AT1G10920 |
| 0.00 | -2.81 | -2.69 | -2.75 | 0.0261 | AT1G49820 |
| 0.00 | -3.39 | -2.20 | -2.79 | 0.0258 | AT2G33480 |
| 0.00 | -2.52 | -3.10 | -2.81 | 0.0271 | AT1G56240 |
| 0.00 | -1.84 | -3.87 | -2.86 | 0.0062 | AT2G23148 |
| 0.00 | -2.69 | -3.06 | -2.87 | 0.0434 | AT3G03650 |
| 0.00 | -3.00 | -3.05 | -3.03 | 0.0172 | AT5G67370 |
| 0.00 | -2.67 | -3.43 | -3.05 | 0.0366 | AT1G18485 |
| 0.00 | -2.01 | -4.15 | -3.08 | 0.0177 | AT1G48260 |
| 0.00 | -3.39 | -2.90 | -3.14 | 0.0189 | AT4G30830 |
| 0.00 | -3.58 | -2.78 | -3.18 | 0.0428 | AT1G69550 |
| 0.00 | -2.42 | -4.02 | -3.22 | 0.0406 | AT2G36145 |
| 0.00 | -3.12 | -3.33 | -3.22 | 0.0123 | AT2G41850 |
| 0.00 | -3.66 | -2.85 | -3.25 | 0.0146 | AT1G73260 |
| 0.00 | -3.02 | -3.50 | -3.26 | 0.0441 | AT2G07787 |
| 0.00 | -3.30 | -3.24 | -3.27 | 0.0416 | AT2G24540 |
| 0.00 | -2.62 | -3.92 | -3.27 | 0.0297 | AT1G30700 |
| 0.00 | -3.23 | -3.31 | -3.27 | 0.0152 | AT3G01670 |
| 0.00 | -3.07 | -3.56 | -3.31 | 0.0454 | AT5G46115 |
| 0.00 | -3.64 | -3.03 | -3.34 | 0.0030 | AT3G24520 |
| 0.00 | -3.37 | -3.31 | -3.34 | 0.0415 | AT2G47950 |
| 0.00 | -3.86 | -2.84 | -3.35 | 0.0205 | AT5G14360 |
| 0.00 | -3.28 | -3.56 | -3.42 | 0.0111 | AT1G69490 |
| 0.00 | -3.44 | -3.45 | -3.45 | 0.0460 | AT3G27425 |
| 0.00 | -3.42 | -3.51 | -3.46 | 0.0452 | AT1G49720 |
| 0.00 | -3.23 | -3.75 | -3.49 | 0.0404 | AT3G19370 |



|      |       |       |       |        |           |
|------|-------|-------|-------|--------|-----------|
| 0.00 | -3.69 | -3.38 | -3.53 | 0.0207 | AT5G04150 |
| 0.00 | -3.24 | -4.02 | -3.63 | 0.0470 | AT5G04200 |
| 0.00 | -3.03 | -4.37 | -3.70 | 0.0122 | AT4G15765 |
| 0.00 | -4.78 | -2.68 | -3.73 | 0.0473 | AT3G14570 |
| 0.00 | -3.76 | -3.72 | -3.74 | 0.0450 | AT1G19220 |
| 0.00 | -3.55 | -4.23 | -3.89 | 0.0306 | AT2G02515 |
| 0.00 | -4.28 | -3.71 | -3.99 | 0.0340 | AT2G39470 |
| 0.00 | -4.18 | -3.91 | -4.05 | 0.0039 | AT4G34560 |
| 0.00 | -3.65 | -4.49 | -4.07 | 0.0395 | AT4G32110 |
| 0.00 | -4.67 | -3.53 | -4.10 | 0.0019 | AT5G39260 |
| 0.00 | -4.15 | -4.19 | -4.17 | 0.0256 | AT5G45890 |
| 0.00 | -4.45 | -3.90 | -4.18 | 0.0454 | AT2G32860 |
| 0.00 | -4.14 | -4.56 | -4.35 | 0.0303 | AT3G48420 |
| 0.00 | -4.30 | -4.47 | -4.38 | 0.0319 | AT1G70760 |
| 0.00 | -4.65 | -4.14 | -4.39 | 0.0248 | AT1G15980 |
| 0.00 | -3.80 | -5.19 | -4.49 | 0.0219 | AT3G06500 |
| 0.00 | -4.25 | -4.81 | -4.53 | 0.0155 | AT1G49620 |
| 0.00 | -5.23 | -4.09 | -4.66 | 0.0131 | AT4G37390 |
| 0.00 | -4.41 | -5.57 | -4.99 | 0.0389 | AT3G12890 |
| 0.00 | -5.02 | -5.00 | -5.01 | 0.0242 | AT3G26130 |
| 0.00 | -5.03 | -5.00 | -5.02 | 0.0141 | AT2G17940 |
| 0.00 | -4.97 | -5.20 | -5.08 | 0.0484 | AT3G18290 |
| 0.00 | -5.57 | -4.91 | -5.24 | 0.0484 | AT3G56810 |
| 0.00 | -6.36 | -5.61 | -5.99 | 0.0335 | AT2G34000 |
| 0.00 | -5.89 | -6.76 | -6.32 | 0.0469 | AT5G23810 |
| 0.00 | -7.03 | -7.27 | -7.15 | 0.0310 | AT2G39850 |

## Supplementary material 6

### Up-regulated Functional category

| Term                                                           | Number of genes | P- Value      |
|----------------------------------------------------------------|-----------------|---------------|
| GO:0050896~response to stimulus                                | 532             | <b>0.0000</b> |
| GO:0006950~response to stress                                  | 326             | <b>0.0000</b> |
| GO:0051707~response to other organism                          | 145             | <b>0.0000</b> |
| GO:0005576~extracellular region                                | 188             | <b>0.0000</b> |
| GO:0009628~response to abiotic stimulus                        | 191             | <b>0.0000</b> |
| GO:0009607~response to biotic stimulus                         | 151             | <b>0.0000</b> |
| GO:0032502~developmental process                               | 256             | <b>0.0000</b> |
| GO:0042221~response to chemical stimulus                       | 275             | <b>0.0000</b> |
| GO:0007275~multicellular organismal development                | 238             | <b>0.0000</b> |
| GO:0032501~multicellular organismal process                    | 247             | <b>0.0000</b> |
| GO:0048513~organ development                                   | 120             | <b>0.0000</b> |
| GO:0048731~system development                                  | 120             | <b>0.0000</b> |
| GO:0051704~multi-organism process                              | 160             | <b>0.0000</b> |
| GO:0010033~response to organic substance                       | 183             | <b>0.0000</b> |
| GO:0009719~response to endogenous stimulus                     | 158             | <b>0.0000</b> |
| GO:0048856~anatomical structure development                    | 198             | <b>0.0000</b> |
| GO:0001906~cell killing                                        | 68              | <b>0.0000</b> |
| GO:0031640~killing of cells of another organism                | 68              | <b>0.0000</b> |
| GO:0009620~response to fungus                                  | 86              | <b>0.0000</b> |
| GO:0032787~monocarboxylic acid metabolic process               | 74              | <b>0.0000</b> |
| GO:0050832~defense response to fungus                          | 78              | <b>0.0000</b> |
| GO:0009698~phenylpropanoid metabolic process                   | 44              | <b>0.0000</b> |
| GO:0009725~response to hormone stimulus                        | 139             | <b>0.0000</b> |
| GO:0006631~fatty acid metabolic process                        | 50              | <b>0.0000</b> |
| GO:0004497~monooxygenase activity                              | 61              | <b>0.0000</b> |
| GO:0009813~flavonoid biosynthetic process                      | 22              | <b>0.0000</b> |
| GO:0042398~cellular amino acid derivative biosynthetic process | 46              | <b>0.0000</b> |
| GO:0005506~iron ion binding                                    | 107             | <b>0.0000</b> |
| GO:0019825~oxygen binding                                      | 48              | <b>0.0000</b> |
| GO:0009699~phenylpropanoid biosynthetic process                | 35              | <b>0.0000</b> |
| GO:0009812~flavonoid metabolic process                         | 22              | <b>0.0000</b> |
| GO:0003677~DNA binding                                         | 276             | <b>0.0000</b> |
| GO:0006575~cellular amino acid derivative metabolic process    | 57              | <b>0.0000</b> |
| GO:0009416~response to light stimulus                          | 81              | <b>0.0000</b> |
| GO:0035251~UDP-glucosyltransferase activity                    | 31              | <b>0.0000</b> |
| GO:0009266~response to temperature stimulus                    | 66              | <b>0.0000</b> |
| GO:0009314~response to radiation                               | 82              | <b>0.0000</b> |
| GO:0009414~response to water deprivation                       | 41              | <b>0.0000</b> |
| GO:0046527~glucosyltransferase activity                        | 33              | <b>0.0000</b> |
| GO:0008194~UDP-glycosyltransferase activity                    | 46              | <b>0.0000</b> |
| GO:0003700~transcription factor activity                       | 200             | <b>0.0000</b> |
| GO:0009415~response to water                                   | 42              | <b>0.0000</b> |
| GO:0006633~fatty acid biosynthetic process                     | 38              | <b>0.0000</b> |
| GO:0006952~defense response                                    | 145             | <b>0.0000</b> |
| GO:0016758~transferase activity, transferring hexosyl groups   | 65              | <b>0.0000</b> |
| GO:0020037~heme binding                                        | 62              | <b>0.0000</b> |
| GO:0006725~cellular aromatic compound metabolic process        | 63              | <b>0.0000</b> |
| GO:0046906~tetrapyrrole binding                                | 65              | <b>0.0000</b> |
| GO:0009408~response to heat                                    | 32              | <b>0.0000</b> |
| GO:0042546~cell wall biogenesis                                | 23              | <b>0.0000</b> |
| GO:0019748~secondary metabolic process                         | 72              | <b>0.0000</b> |
| GO:0046658~anchored to plasma membrane                         | 21              | <b>0.0000</b> |
| GO:0009739~response to gibberellin stimulus                    | 30              | <b>0.0000</b> |

|                                                                  |     |        |
|------------------------------------------------------------------|-----|--------|
| GO:0016053~organic acid biosynthetic process                     | 69  | 0.0000 |
| GO:0046394~carboxylic acid biosynthetic process                  | 69  | 0.0000 |
| GO:0022621~shoot system development                              | 53  | 0.0000 |
| GO:0016757~transferase activity, transferring glycosyl groups    | 74  | 0.0000 |
| GO:0046914~transition metal ion binding                          | 294 | 0.0000 |
| GO:0009753~response to jasmonic acid stimulus                    | 35  | 0.0000 |
| GO:0010383~cell wall polysaccharide metabolic process            | 10  | 0.0000 |
| GO:0016491~oxidoreductase activity                               | 176 | 0.0000 |
| GO:0048367~shoot development                                     | 52  | 0.0000 |
| GO:0005634~nucleus                                               | 363 | 0.0000 |
| GO:0003006~reproductive developmental process                    | 114 | 0.0000 |
| GO:0009908~flower development                                    | 45  | 0.0000 |
| GO:0030528~transcription regulator activity                      | 214 | 0.0000 |
| GO:0080044~quercetin 7-O-glucosyltransferase activity            | 10  | 0.0000 |
| GO:0008610~lipid biosynthetic process                            | 68  | 0.0000 |
| GO:0048608~reproductive structure development                    | 105 | 0.0000 |
| GO:0006629~lipid metabolic process                               | 110 | 0.0000 |
| GO:0042180~cellular ketone metabolic process                     | 110 | 0.0000 |
| GO:0019438~aromatic compound biosynthetic process                | 42  | 0.0000 |
| GO:0043436~oxoacid metabolic process                             | 108 | 0.0000 |
| GO:0019752~carboxylic acid metabolic process                     | 108 | 0.0000 |
| GO:0006082~organic acid metabolic process                        | 108 | 0.0000 |
| GO:0009791~post-embryonic development                            | 117 | 0.0000 |
| GO:0080043~quercetin 3-O-glucosyltransferase activity            | 11  | 0.0000 |
| GO:0043167~ion binding                                           | 362 | 0.0000 |
| GO:0043169~cation binding                                        | 361 | 0.0000 |
| GO:0048869~cellular developmental process                        | 69  | 0.0000 |
| GO:0045491~xylan metabolic process                               | 8   | 0.0000 |
| GO:0010410~hemicellulose metabolic process                       | 8   | 0.0000 |
| GO:0010417~glucuronoxylan biosynthetic process                   | 7   | 0.0000 |
| GO:0045492~xylan biosynthetic process                            | 7   | 0.0000 |
| GO:0070592~cell wall polysaccharide biosynthetic process         | 7   | 0.0000 |
| GO:0010413~glucuronoxylan metabolic process                      | 7   | 0.0000 |
| GO:0065007~biological regulation                                 | 444 | 0.0000 |
| GO:0044255~cellular lipid metabolic process                      | 73  | 0.0000 |
| GO:0022414~reproductive process                                  | 119 | 0.0000 |
| GO:0042445~hormone metabolic process                             | 20  | 0.0000 |
| GO:0031226~intrinsic to plasma membrane                          | 24  | 0.0000 |
| GO:0010817~regulation of hormone levels                          | 27  | 0.0000 |
| GO:0006350~transcription                                         | 163 | 0.0000 |
| GO:0000003~reproduction                                          | 120 | 0.0000 |
| GO:0009888~tissue development                                    | 43  | 0.0000 |
| GO:0009653~anatomical structure morphogenesis                    | 70  | 0.0000 |
| GO:0065008~regulation of biological quality                      | 90  | 0.0000 |
| GO:0016051~carbohydrate biosynthetic process                     | 44  | 0.0001 |
| GO:0009832~plant-type cell wall biogenesis                       | 16  | 0.0001 |
| GO:0010382~cellular cell wall macromolecule metabolic process    | 8   | 0.0001 |
| GO:0048046~apoplast                                              | 57  | 0.0001 |
| GO:0030054~cell junction                                         | 10  | 0.0001 |
| GO:0008202~steroid metabolic process                             | 18  | 0.0001 |
| GO:0046872~metal ion binding                                     | 336 | 0.0001 |
| GO:0055044~symplast                                              | 8   | 0.0001 |
| GO:0009506~plasmodesma                                           | 8   | 0.0001 |
| GO:0009723~response to ethylene stimulus                         | 43  | 0.0001 |
| GO:0006970~response to osmotic stress                            | 60  | 0.0001 |
| GO:0031323~regulation of cellular metabolic process              | 247 | 0.0002 |
| GO:0070589~cellular component macromolecule biosynthetic process | 7   | 0.0002 |
| GO:0044038~cell wall macromolecule biosynthetic process          | 7   | 0.0002 |

|                                                                                                  |     |               |
|--------------------------------------------------------------------------------------------------|-----|---------------|
| GO:0048827~phyllome development                                                                  | 36  | <b>0.0002</b> |
| GO:0030154~cell differentiation                                                                  | 49  | <b>0.0002</b> |
| GO:0003824~catalytic activity                                                                    | 770 | <b>0.0002</b> |
| GO:0009889~regulation of biosynthetic process                                                    | 237 | <b>0.0002</b> |
| GO:0031326~regulation of cellular biosynthetic process                                           | 237 | <b>0.0002</b> |
| GO:0008544~epidermis development                                                                 | 24  | <b>0.0003</b> |
| GO:0007398~ectoderm development                                                                  | 24  | <b>0.0003</b> |
| GO:0048523~negative regulation of cellular process                                               | 34  | <b>0.0003</b> |
| GO:0000786~nucleosome                                                                            | 16  | <b>0.0003</b> |
| GO:0032993~protein-DNA complex                                                                   | 17  | <b>0.0003</b> |
| GO:0010286~heat acclimation                                                                      | 8   | <b>0.0003</b> |
| GO:0010025~wax biosynthetic process                                                              | 8   | <b>0.0003</b> |
| GO:0019219~regulation of nucleobase, nucleoside, nucleotide and nucleic acid metabolic process   | 231 | <b>0.0003</b> |
| GO:0009873~ethylene mediated signaling pathway                                                   | 31  | <b>0.0003</b> |
| GO:0051171~regulation of nitrogen compound metabolic process                                     | 232 | <b>0.0003</b> |
| GO:0009605~response to external stimulus                                                         | 53  | <b>0.0003</b> |
| GO:0006519~cellular amino acid and derivative metabolic process                                  | 82  | <b>0.0004</b> |
| GO:0051716~cellular response to stimulus                                                         | 121 | <b>0.0004</b> |
| GO:0009055~electron carrier activity                                                             | 80  | <b>0.0004</b> |
| GO:0048825~cotyledon development                                                                 | 10  | <b>0.0004</b> |
| GO:0010556~regulation of macromolecule biosynthetic process                                      | 232 | <b>0.0004</b> |
| GO:0010166~wax metabolic process                                                                 | 8   | <b>0.0004</b> |
| GO:0045449~regulation of transcription                                                           | 227 | <b>0.0005</b> |
| GO:0031225~anchored to membrane                                                                  | 47  | <b>0.0005</b> |
| GO:0009913~epidermal cell differentiation                                                        | 23  | <b>0.0005</b> |
| GO:0005911~cell-cell junction                                                                    | 8   | <b>0.0005</b> |
| GO:0051219~phosphoprotein binding                                                                | 7   | <b>0.0005</b> |
| GO:0045309~protein phosphorylated amino acid binding                                             | 7   | <b>0.0005</b> |
| GO:0019439~aromatic compound catabolic process                                                   | 10  | <b>0.0006</b> |
| GO:0009808~lignin metabolic process                                                              | 16  | <b>0.0006</b> |
| GO:0006333~chromatin assembly or disassembly                                                     | 20  | <b>0.0006</b> |
| GO:0047262~polygalacturonate 4-alpha-galacturonosyltransferase activity                          | 9   | <b>0.0007</b> |
| GO:0016628~oxidoreductase activity, acting on the CH-CH group of donors, NAD or NADP as acceptor | 9   | <b>0.0007</b> |
| GO:0031407~oxylipin metabolic process                                                            | 11  | <b>0.0007</b> |
| GO:0009834~secondary cell wall biogenesis                                                        | 8   | <b>0.0007</b> |
| GO:0051213~dioxygenase activity                                                                  | 15  | <b>0.0007</b> |
| GO:0000785~chromatin                                                                             | 19  | <b>0.0007</b> |
| GO:0006355~regulation of transcription, DNA-dependent                                            | 131 | <b>0.0008</b> |
| GO:0055114~oxidation reduction                                                                   | 141 | <b>0.0008</b> |
| GO:0009611~response to wounding                                                                  | 27  | <b>0.0008</b> |
| GO:0033692~cellular polysaccharide biosynthetic process                                          | 21  | <b>0.0009</b> |
| GO:0051252~regulation of RNA metabolic process                                                   | 131 | <b>0.0009</b> |
| GO:0034637~cellular carbohydrate biosynthetic process                                            | 32  | <b>0.0010</b> |
| GO:0080090~regulation of primary metabolic process                                               | 240 | <b>0.0010</b> |
| GO:0009651~response to salt stress                                                               | 53  | <b>0.0010</b> |
| GO:0009718~anthocyanin biosynthetic process                                                      | 6   | <b>0.0011</b> |
| GO:0032870~cellular response to hormone stimulus                                                 | 60  | <b>0.0011</b> |
| GO:0009755~hormone-mediated signaling                                                            | 60  | <b>0.0011</b> |
| GO:0006334~nucleosome assembly                                                                   | 16  | <b>0.0012</b> |
| GO:0034728~nucleosome organization                                                               | 16  | <b>0.0012</b> |
| GO:0009409~response to cold                                                                      | 37  | <b>0.0012</b> |
| GO:0050794~regulation of cellular process                                                        | 360 | <b>0.0012</b> |
| GO:0016679~oxidoreductase activity, acting on diphenols and related substances as donors         | 11  | <b>0.0012</b> |
| GO:0016128~phytosteroid metabolic process                                                        | 7   | <b>0.0014</b> |
| GO:0016131~brassinosteroid metabolic process                                                     | 7   | <b>0.0014</b> |

|                                                                                                                                          |     |               |
|------------------------------------------------------------------------------------------------------------------------------------------|-----|---------------|
| GO:0044036~cell wall macromolecule metabolic process                                                                                     | 13  | <b>0.0015</b> |
| GO:0000271~polysaccharide biosynthetic process                                                                                           | 21  | <b>0.0015</b> |
| GO:0048518~positive regulation of biological process                                                                                     | 34  | <b>0.0015</b> |
| GO:0009639~response to red or far red light                                                                                              | 29  | <b>0.0015</b> |
| GO:0006694~steroid biosynthetic process                                                                                                  | 12  | <b>0.0016</b> |
| GO:0043565~sequence-specific DNA binding                                                                                                 | 60  | <b>0.0016</b> |
| GO:0031497~chromatin assembly                                                                                                            | 16  | <b>0.0016</b> |
| GO:0009694~jasmonic acid metabolic process                                                                                               | 9   | <b>0.0016</b> |
| GO:0016563~transcription activator activity                                                                                              | 24  | <b>0.0017</b> |
| GO:0016702~oxidoreductase activity, acting on single donors with incorporation of molecular oxygen, incorporation of two atoms of oxygen | 14  | <b>0.0017</b> |
| GO:0008471~laccase activity                                                                                                              | 7   | <b>0.0018</b> |
| GO:0048437~floral organ development                                                                                                      | 23  | <b>0.0018</b> |
| GO:0065004~protein-DNA complex assembly                                                                                                  | 16  | <b>0.0019</b> |
| GO:0044427~chromosomal part                                                                                                              | 26  | <b>0.0021</b> |
| GO:0016701~oxidoreductase activity, acting on single donors with incorporation of molecular oxygen                                       | 15  | <b>0.0021</b> |
| GO:0009751~response to salicylic acid stimulus                                                                                           | 26  | <b>0.0023</b> |
| GO:0048878~chemical homeostasis                                                                                                          | 22  | <b>0.0024</b> |
| GO:0044459~plasma membrane part                                                                                                          | 39  | <b>0.0024</b> |
| GO:0019904~protein domain specific binding                                                                                               | 7   | <b>0.0025</b> |
| GO:0019222~regulation of metabolic process                                                                                               | 255 | <b>0.0026</b> |
| GO:0046271~phenylpropanoid catabolic process                                                                                             | 7   | <b>0.0029</b> |
| GO:0046274~lignin catabolic process                                                                                                      | 7   | <b>0.0029</b> |
| GO:0007017~microtubule-based process                                                                                                     | 22  | <b>0.0030</b> |
| GO:0048569~post-embryonic organ development                                                                                              | 29  | <b>0.0031</b> |
| GO:0044264~cellular polysaccharide metabolic process                                                                                     | 26  | <b>0.0032</b> |
| GO:0016043~cellular component organization                                                                                               | 144 | <b>0.0033</b> |
| GO:0006323~DNA packaging                                                                                                                 | 16  | <b>0.0037</b> |
| GO:0048236~plant-type spore development                                                                                                  | 7   | <b>0.0041</b> |
| GO:0050789~regulation of biological process                                                                                              | 381 | <b>0.0041</b> |
| GO:0004126~cytidine deaminase activity                                                                                                   | 5   | <b>0.0042</b> |
| GO:0009937~regulation of gibberellic acid mediated signaling                                                                             | 6   | <b>0.0043</b> |
| GO:0048316~seed development                                                                                                              | 57  | <b>0.0046</b> |
| GO:0010468~regulation of gene expression                                                                                                 | 235 | <b>0.0046</b> |
| GO:0010154~fruit development                                                                                                             | 59  | <b>0.0049</b> |
| GO:0004838~L-tyrosine:2-oxoglutarate aminotransferase activity                                                                           | 4   | <b>0.0050</b> |
| GO:0080087~callose binding                                                                                                               | 4   | <b>0.0050</b> |
| GO:0070547~L-tyrosine aminotransferase activity                                                                                          | 4   | <b>0.0050</b> |
| GO:0005694~chromosome                                                                                                                    | 31  | <b>0.0051</b> |
| GO:0006325~chromatin organization                                                                                                        | 33  | <b>0.0052</b> |
| GO:0048522~positive regulation of cellular process                                                                                       | 23  | <b>0.0053</b> |
| GO:0009644~response to high light intensity                                                                                              | 11  | <b>0.0054</b> |
| GO:0000041~transition metal ion transport                                                                                                | 15  | <b>0.0057</b> |
| GO:0009642~response to light intensity                                                                                                   | 15  | <b>0.0057</b> |
| GO:0004312~fatty-acid synthase activity                                                                                                  | 6   | <b>0.0057</b> |
| GO:0006826~iron ion transport                                                                                                            | 8   | <b>0.0057</b> |
| GO:0046135~pyrimidine nucleoside catabolic process                                                                                       | 5   | <b>0.0060</b> |
| GO:0046133~pyrimidine ribonucleoside catabolic process                                                                                   | 5   | <b>0.0060</b> |
| GO:0010043~response to zinc ion                                                                                                          | 5   | <b>0.0060</b> |
| GO:0048583~regulation of response to stimulus                                                                                            | 25  | <b>0.0060</b> |
| GO:0030244~cellulose biosynthetic process                                                                                                | 10  | <b>0.0061</b> |
| GO:0046283~anthocyanin metabolic process                                                                                                 | 6   | <b>0.0062</b> |
| GO:0060255~regulation of macromolecule metabolic process                                                                                 | 242 | <b>0.0065</b> |
| GO:0010023~proanthocyanidin biosynthetic process                                                                                         | 4   | <b>0.0066</b> |
| GO:0016682~oxidoreductase activity, acting on diphenols and related substances as donors, oxygen as acceptor                             | 8   | <b>0.0066</b> |
| GO:0048229~gametophyte development                                                                                                       | 29  | <b>0.0066</b> |



|                                                                                                                  |    |               |
|------------------------------------------------------------------------------------------------------------------|----|---------------|
| GO:0009740~gibberellic acid mediated signaling                                                                   | 9  | <b>0.0068</b> |
| GO:0010476~gibberellin-mediated signaling                                                                        | 9  | <b>0.0068</b> |
| GO:0006869~lipid transport                                                                                       | 24 | <b>0.0073</b> |
| GO:0006996~organelle organization                                                                                | 74 | <b>0.0077</b> |
| GO:0010876~lipid localization                                                                                    | 26 | <b>0.0080</b> |
| GO:0005783~endoplasmic reticulum                                                                                 | 55 | <b>0.0080</b> |
| GO:0044430~cytoskeletal part                                                                                     | 28 | <b>0.0082</b> |
| GO:0009553~embryo sac development                                                                                | 15 | <b>0.0082</b> |
| GO:0045735~nutrient reservoir activity                                                                           | 13 | <b>0.0083</b> |
| GO:0016746~transferase activity, transferring acyl groups                                                        | 38 | <b>0.0089</b> |
| GO:0022402~cell cycle process                                                                                    | 22 | <b>0.0091</b> |
| GO:0048366~leaf development                                                                                      | 28 | <b>0.0092</b> |
| GO:0009164~nucleoside catabolic process                                                                          | 5  | <b>0.0093</b> |
| GO:0042454~ribonucleoside catabolic process                                                                      | 5  | <b>0.0093</b> |
| GO:0033205~cytokinesis during cell cycle                                                                         | 7  | <b>0.0093</b> |
| GO:0009922~fatty acid elongase activity                                                                          | 4  | <b>0.0094</b> |
| GO:0010279~indole-3-acetic acid amido synthetase activity                                                        | 4  | <b>0.0094</b> |
| GO:0048467~gynoecium development                                                                                 | 12 | <b>0.0099</b> |
| GO:0030312~external encapsulating structure                                                                      | 72 | <b>0.0102</b> |
| GO:0003993~acid phosphatase activity                                                                             | 10 | <b>0.0104</b> |
| GO:0008289~lipid binding                                                                                         | 32 | <b>0.0105</b> |
| GO:0008092~cytoskeletal protein binding                                                                          | 18 | <b>0.0106</b> |
| GO:0019842~vitamin binding                                                                                       | 24 | <b>0.0108</b> |
| GO:0032989~cellular component morphogenesis                                                                      | 33 | <b>0.0113</b> |
| GO:0009737~response to abscisic acid stimulus                                                                    | 39 | <b>0.0113</b> |
| GO:0015674~di-, tri-valent inorganic cation transport                                                            | 12 | <b>0.0113</b> |
| GO:0022622~root system development                                                                               | 29 | <b>0.0115</b> |
| GO:0048364~root development                                                                                      | 29 | <b>0.0115</b> |
| GO:0010252~auxin homeostasis                                                                                     | 6  | <b>0.0117</b> |
| GO:0009556~microsporogenesis                                                                                     | 6  | <b>0.0117</b> |
| GO:0009606~tropism                                                                                               | 11 | <b>0.0118</b> |
| GO:0009867~jasmonic acid mediated signaling pathway                                                              | 9  | <b>0.0119</b> |
| GO:0005856~cytoskeleton                                                                                          | 33 | <b>0.0120</b> |
| GO:0009629~response to gravity                                                                                   | 10 | <b>0.0120</b> |
| GO:0016747~transferase activity, transferring acyl groups other than amino-acyl groups                           | 35 | <b>0.0121</b> |
| GO:0007049~cell cycle                                                                                            | 33 | <b>0.0135</b> |
| GO:0034655~nucleobase, nucleoside, nucleotide and nucleic acid catabolic process                                 | 5  | <b>0.0135</b> |
| GO:0034656~nucleobase, nucleoside and nucleotide catabolic process                                               | 5  | <b>0.0135</b> |
| GO:0042219~cellular amino acid derivative catabolic process                                                      | 8  | <b>0.0135</b> |
| GO:0007568~aging                                                                                                 | 14 | <b>0.0140</b> |
| GO:0009617~response to bacterium                                                                                 | 34 | <b>0.0143</b> |
| GO:0005618~cell wall                                                                                             | 70 | <b>0.0143</b> |
| GO:0001708~cell fate specification                                                                               | 7  | <b>0.0149</b> |
| GO:0044270~nitrogen compound catabolic process                                                                   | 7  | <b>0.0149</b> |
| GO:0005507~copper ion binding                                                                                    | 24 | <b>0.0150</b> |
| GO:0000160~two-component signal transduction system (phosphorelay)                                               | 31 | <b>0.0150</b> |
| GO:0048438~floral whorl development                                                                              | 18 | <b>0.0153</b> |
| GO:0010436~carotenoid dioxygenase activity                                                                       | 4  | <b>0.0154</b> |
| GO:0045549~9-cis-epoxycarotenoid dioxygenase activity                                                            | 4  | <b>0.0154</b> |
| GO:0040007~growth                                                                                                | 34 | <b>0.0159</b> |
| GO:0009574~preprophase band                                                                                      | 5  | <b>0.0160</b> |
| GO:0016627~oxidoreductase activity, acting on the CH-CH group of donors                                          | 13 | <b>0.0162</b> |
| GO:0016705~oxidoreductase activity, acting on paired donors, with incorporation or reduction of molecular oxygen | 27 | <b>0.0162</b> |

|                                                                                                                                                                                       |     |               |
|---------------------------------------------------------------------------------------------------------------------------------------------------------------------------------------|-----|---------------|
| GO:0046700~heterocycle catabolic process                                                                                                                                              | 8   | <b>0.0163</b> |
| GO:0051258~protein polymerization                                                                                                                                                     | 8   | <b>0.0163</b> |
| GO:0016036~cellular response to phosphate starvation                                                                                                                                  | 9   | <b>0.0166</b> |
| GO:0032535~regulation of cellular component size                                                                                                                                      | 33  | <b>0.0169</b> |
| GO:0016740~transferase activity                                                                                                                                                       | 272 | <b>0.0172</b> |
| GO:0005102~receptor binding                                                                                                                                                           | 9   | <b>0.0176</b> |
| GO:0015020~glucuronosyltransferase activity                                                                                                                                           | 5   | <b>0.0182</b> |
| GO:0009887~organ morphogenesis                                                                                                                                                        | 25  | <b>0.0183</b> |
| GO:0051276~chromosome organization                                                                                                                                                    | 35  | <b>0.0187</b> |
| GO:0000325~plant-type vacuole                                                                                                                                                         | 13  | <b>0.0188</b> |
| GO:0007018~microtubule-based movement                                                                                                                                                 | 14  | <b>0.0193</b> |
| GO:0000226~microtubule cytoskeleton organization                                                                                                                                      | 9   | <b>0.0194</b> |
| GO:0009269~response to desiccation                                                                                                                                                    | 6   | <b>0.0196</b> |
| GO:0007010~cytoskeleton organization                                                                                                                                                  | 18  | <b>0.0198</b> |
| GO:0009705~plant-type vacuole membrane                                                                                                                                                | 9   | <b>0.0201</b> |
| GO:0005975~carbohydrate metabolic process                                                                                                                                             | 107 | <b>0.0205</b> |
| GO:0016760~cellulose synthase (UDP-forming) activity                                                                                                                                  | 7   | <b>0.0208</b> |
| GO:0022607~cellular component assembly                                                                                                                                                | 41  | <b>0.0212</b> |
| GO:0015630~microtubule cytoskeleton                                                                                                                                                   | 23  | <b>0.0213</b> |
| GO:0005835~fatty acid synthase complex                                                                                                                                                | 3   | <b>0.0214</b> |
| GO:0009630~gravitropism                                                                                                                                                               | 9   | <b>0.0225</b> |
| GO:0009850~auxin metabolic process                                                                                                                                                    | 9   | <b>0.0225</b> |
| GO:0009615~response to virus                                                                                                                                                          | 9   | <b>0.0225</b> |
| GO:0016126~sterol biosynthetic process                                                                                                                                                | 8   | <b>0.0229</b> |
| GO:0080046~quercetin 4'-O-glucosyltransferase activity                                                                                                                                | 4   | <b>0.0231</b> |
| GO:0016165~lipoxygenase activity                                                                                                                                                      | 4   | <b>0.0231</b> |
| GO:0008361~regulation of cell size                                                                                                                                                    | 31  | <b>0.0237</b> |
| GO:0000902~cell morphogenesis                                                                                                                                                         | 29  | <b>0.0239</b> |
| GO:0032271~regulation of protein polymerization                                                                                                                                       | 6   | <b>0.0247</b> |
| GO:0010035~response to inorganic substance                                                                                                                                            | 64  | <b>0.0250</b> |
| GO:0031324~negative regulation of cellular metabolic process                                                                                                                          | 15  | <b>0.0255</b> |
| GO:0048584~positive regulation of response to stimulus                                                                                                                                | 11  | <b>0.0256</b> |
| GO:0015197~peptide transporter activity                                                                                                                                               | 6   | <b>0.0257</b> |
| GO:0015198~oligopeptide transporter activity                                                                                                                                          | 6   | <b>0.0257</b> |
| GO:0042446~hormone biosynthetic process                                                                                                                                               | 9   | <b>0.0259</b> |
| GO:0042401~biogenic amine biosynthetic process                                                                                                                                        | 9   | <b>0.0259</b> |
| GO:0009790~embryonic development                                                                                                                                                      | 51  | <b>0.0266</b> |
| GO:0051493~regulation of cytoskeleton organization                                                                                                                                    | 7   | <b>0.0268</b> |
| GO:0048481~ovule development                                                                                                                                                          | 8   | <b>0.0269</b> |
| GO:0005874~microtubule                                                                                                                                                                | 18  | <b>0.0286</b> |
| GO:0016709~oxidoreductase activity, acting on paired donors, with incorporation or reduction of molecular oxygen, NADH or NADPH as one donor, and incorporation of one atom of oxygen | 10  | <b>0.0287</b> |
| GO:0044262~cellular carbohydrate metabolic process                                                                                                                                    | 61  | <b>0.0289</b> |
| GO:0000910~cytokinesis                                                                                                                                                                | 9   | <b>0.0297</b> |
| GO:0009972~cytidine deamination                                                                                                                                                       | 4   | <b>0.0299</b> |
| GO:0046087~cytidine metabolic process                                                                                                                                                 | 4   | <b>0.0299</b> |
| GO:0006216~cytidine catabolic process                                                                                                                                                 | 4   | <b>0.0299</b> |
| GO:0006260~DNA replication                                                                                                                                                            | 19  | <b>0.0302</b> |
| GO:0044087~regulation of cellular component biogenesis                                                                                                                                | 6   | <b>0.0305</b> |
| GO:0010647~positive regulation of cell communication                                                                                                                                  | 6   | <b>0.0305</b> |
| GO:0043254~regulation of protein complex assembly                                                                                                                                     | 6   | <b>0.0305</b> |
| GO:0048440~carpel development                                                                                                                                                         | 10  | <b>0.0313</b> |
| GO:0004366~glycerol-3-phosphate O-acyltransferase activity                                                                                                                            | 4   | <b>0.0326</b> |
| GO:0016139~glycoside catabolic process                                                                                                                                                | 5   | <b>0.0329</b> |
| GO:0016049~cell growth                                                                                                                                                                | 29  | <b>0.0331</b> |
| GO:0009119~ribonucleoside metabolic process                                                                                                                                           | 9   | <b>0.0339</b> |
| GO:0008415~acyltransferase activity                                                                                                                                                   | 28  | <b>0.0342</b> |
| GO:0016759~cellulose synthase activity                                                                                                                                                | 8   | <b>0.0343</b> |



|                                                               |     |               |
|---------------------------------------------------------------|-----|---------------|
| GO:0015631~tubulin binding                                    | 8   | <b>0.0343</b> |
| GO:0009886~post-embryonic morphogenesis                       | 13  | <b>0.0349</b> |
| GO:0043086~negative regulation of catalytic activity          | 12  | <b>0.0355</b> |
| GO:0016125~sterol metabolic process                           | 8   | <b>0.0361</b> |
| GO:0030170~pyridoxal phosphate binding                        | 17  | <b>0.0363</b> |
| GO:0070279~vitamin B6 binding                                 | 17  | <b>0.0363</b> |
| GO:0070704~sterol desaturase activity                         | 3   | <b>0.0367</b> |
| GO:0047215~indole-3-acetate beta-glucosyltransferase activity | 3   | <b>0.0367</b> |
| GO:0019239~deaminase activity                                 | 5   | <b>0.0381</b> |
| GO:0009250~glucan biosynthetic process                        | 13  | <b>0.0383</b> |
| GO:0042594~response to starvation                             | 12  | <b>0.0391</b> |
| GO:0035315~hair cell differentiation                          | 11  | <b>0.0396</b> |
| GO:0010026~trichome differentiation                           | 11  | <b>0.0396</b> |
| GO:0042440~pigment metabolic process                          | 16  | <b>0.0403</b> |
| GO:0048037~cofactor binding                                   | 56  | <b>0.0407</b> |
| GO:0012505~endomembrane system                                | 386 | <b>0.0410</b> |
| GO:0010227~floral organ abscission                            | 5   | <b>0.0417</b> |
| GO:0016129~phytosteroid biosynthetic process                  | 4   | <b>0.0419</b> |
| GO:0016132~brassinosteroid biosynthetic process               | 4   | <b>0.0419</b> |
| GO:0031224~intrinsic to membrane                              | 256 | <b>0.0423</b> |
| GO:0005976~polysaccharide metabolic process                   | 29  | <b>0.0427</b> |
| GO:0005774~vacuolar membrane                                  | 13  | <b>0.0433</b> |
| GO:0016143~S-glycoside metabolic process                      | 9   | <b>0.0433</b> |
| GO:0019757~glucosinolate metabolic process                    | 9   | <b>0.0433</b> |
| GO:0009741~response to brassinosteroid stimulus               | 9   | <b>0.0433</b> |
| GO:0019760~glucosinolate metabolic process                    | 9   | <b>0.0433</b> |
| GO:0045165~cell fate commitment                               | 7   | <b>0.0438</b> |
| GO:0015692~lead ion transport                                 | 3   | <b>0.0441</b> |
| GO:0032101~regulation of response to external stimulus        | 3   | <b>0.0441</b> |
| GO:0032104~regulation of response to extracellular stimulus   | 3   | <b>0.0441</b> |
| GO:0032107~regulation of response to nutrient levels          | 3   | <b>0.0441</b> |
| GO:0009833~primary cell wall biogenesis                       | 3   | <b>0.0441</b> |
| GO:0080027~response to herbivore                              | 3   | <b>0.0441</b> |
| GO:0007242~intracellular signaling cascade                    | 87  | <b>0.0471</b> |
| GO:0031669~cellular response to nutrient levels               | 12  | <b>0.0471</b> |
| GO:0009267~cellular response to starvation                    | 11  | <b>0.0482</b> |
| GO:0010038~response to metal ion                              | 46  | <b>0.0486</b> |
| GO:0009809~lignin biosynthetic process                        | 9   | <b>0.0487</b> |

#### Down-regulated Functional category

| Term                                                            | Number of genes | P- Value      |
|-----------------------------------------------------------------|-----------------|---------------|
| GO:0045087~innate immune response                               | 52              | <b>0.0000</b> |
| GO:0006955~immune response                                      | 54              | <b>0.0000</b> |
| GO:0002376~immune system process                                | 55              | <b>0.0000</b> |
| GO:0006457~protein folding                                      | 48              | <b>0.0000</b> |
| GO:0004888~transmembrane receptor activity                      | 44              | <b>0.0000</b> |
| GO:0012501~programmed cell death                                | 44              | <b>0.0000</b> |
| GO:0006915~apoptosis                                            | 37              | <b>0.0000</b> |
| GO:0031072~heat shock protein binding                           | 32              | <b>0.0000</b> |
| GO:0016265~death                                                | 45              | <b>0.0000</b> |
| GO:0008219~cell death                                           | 45              | <b>0.0000</b> |
| GO:0009507~chloroplast                                          | 343             | <b>0.0000</b> |
| GO:0009536~plastid                                              | 347             | <b>0.0000</b> |
| GO:0005488~binding                                              | 1109            | <b>0.0000</b> |
| GO:0051082~unfolded protein binding                             | 24              | <b>0.0000</b> |
| GO:0006800~oxygen and reactive oxygen species metabolic process | 22              | <b>0.0001</b> |
| GO:0004872~receptor activity                                    | 78              | <b>0.0001</b> |

|                                                                                                       |     |               |
|-------------------------------------------------------------------------------------------------------|-----|---------------|
| GO:0034614~cellular response to reactive oxygen species                                               | 20  | <b>0.0001</b> |
| GO:0034599~cellular response to oxidative stress                                                      | 20  | <b>0.0001</b> |
| GO:0070301~cellular response to hydrogen peroxide                                                     | 18  | <b>0.0002</b> |
| GO:0042744~hydrogen peroxide catabolic process                                                        | 18  | <b>0.0002</b> |
| GO:0020037~heme binding                                                                               | 53  | <b>0.0002</b> |
| GO:0042743~hydrogen peroxide metabolic process                                                        | 18  | <b>0.0003</b> |
| GO:0055114~oxidation reduction                                                                        | 123 | <b>0.0003</b> |
| GO:0046983~protein dimerization activity                                                              | 39  | <b>0.0003</b> |
| GO:0004713~protein tyrosine kinase activity                                                           | 45  | <b>0.0006</b> |
| GO:0046914~transition metal ion binding                                                               | 278 | <b>0.0007</b> |
| GO:0009570~chloroplast stroma                                                                         | 56  | <b>0.0008</b> |
| GO:0046906~tetrapyrrole binding                                                                       | 54  | <b>0.0008</b> |
| GO:0000302~response to reactive oxygen species                                                        | 23  | <b>0.0009</b> |
| GO:0044434~chloroplast part                                                                           | 109 | <b>0.0010</b> |
| GO:0009055~electron carrier activity                                                                  | 79  | <b>0.0013</b> |
| GO:0009532~plastid stroma                                                                             | 56  | <b>0.0024</b> |
| GO:0006468~protein amino acid phosphorylation                                                         | 107 | <b>0.0025</b> |
| GO:0044435~plastid part                                                                               | 109 | <b>0.0028</b> |
| GO:0004601~peroxidase activity                                                                        | 21  | <b>0.0031</b> |
| GO:0016684~oxidoreductase activity, acting on peroxide as acceptor                                    | 21  | <b>0.0031</b> |
| GO:0060089~molecular transducer activity                                                              | 88  | <b>0.0034</b> |
| GO:0004871~signal transducer activity                                                                 | 88  | <b>0.0034</b> |
| GO:0043167~ion binding                                                                                | 344 | <b>0.0037</b> |
| GO:0016491~oxidoreductase activity                                                                    | 157 | <b>0.0038</b> |
| GO:0043169~cation binding                                                                             | 343 | <b>0.0038</b> |
| GO:0044436~thylakoid part                                                                             | 46  | <b>0.0038</b> |
| GO:0016209~antioxidant activity                                                                       | 23  | <b>0.0040</b> |
| GO:0046872~metal ion binding                                                                          | 327 | <b>0.0044</b> |
| GO:0031976~plastid thylakoid                                                                          | 45  | <b>0.0045</b> |
| GO:0009534~chloroplast thylakoid                                                                      | 45  | <b>0.0045</b> |
| GO:0031984~organelle subcompartment                                                                   | 45  | <b>0.0050</b> |
| GO:0043687~post-translational protein modification                                                    | 134 | <b>0.0052</b> |
| GO:0000166~nucleotide binding                                                                         | 320 | <b>0.0059</b> |
| GO:0003677~DNA binding                                                                                | 240 | <b>0.0061</b> |
| GO:0005524~ATP binding                                                                                | 231 | <b>0.0067</b> |
| GO:0042542~response to hydrogen peroxide                                                              | 18  | <b>0.0074</b> |
| GO:0045038~protein import into chloroplast thylakoid membrane                                         | 4   | <b>0.0074</b> |
| GO:0007165~signal transduction                                                                        | 115 | <b>0.0081</b> |
| GO:0005506~iron ion binding                                                                           | 81  | <b>0.0081</b> |
| GO:0051716~cellular response to stimulus                                                              | 96  | <b>0.0083</b> |
| GO:0016998~cell wall macromolecule catabolic process                                                  | 8   | <b>0.0092</b> |
| GO:0032559~adenyl ribonucleotide binding                                                              | 232 | <b>0.0093</b> |
| GO:0006979~response to oxidative stress                                                               | 34  | <b>0.0118</b> |
| GO:0006950~response to stress                                                                         | 209 | <b>0.0123</b> |
| GO:0009579~thylakoid                                                                                  | 57  | <b>0.0132</b> |
| GO:0008270~zinc ion binding                                                                           | 166 | <b>0.0132</b> |
| GO:0001883~purine nucleoside binding                                                                  | 244 | <b>0.0147</b> |
| GO:0030554~adenyl nucleotide binding                                                                  | 244 | <b>0.0147</b> |
| GO:0004518~nuclease activity                                                                          | 26  | <b>0.0160</b> |
| GO:0009734~auxin mediated signaling pathway                                                           | 17  | <b>0.0160</b> |
| GO:0008937~ferredoxin reductase activity                                                              | 4   | <b>0.0163</b> |
| GO:0016731~oxidoreductase activity, acting on iron-sulfur proteins as donors, NAD or NADP as acceptor | 4   | <b>0.0163</b> |
| GO:0001882~nucleoside binding                                                                         | 244 | <b>0.0166</b> |
| GO:0032553~ribonucleotide binding                                                                     | 251 | <b>0.0181</b> |
| GO:0032555~purine ribonucleotide binding                                                              | 251 | <b>0.0181</b> |
| GO:0033903~endo-1,3(4)-beta-glucanase activity                                                        | 3   | <b>0.0203</b> |
| GO:0009535~chloroplast thylakoid membrane                                                             | 36  | <b>0.0207</b> |

|                                                                                                                                                                                                              |     |               |
|--------------------------------------------------------------------------------------------------------------------------------------------------------------------------------------------------------------|-----|---------------|
| GO:0055035~plastid thylakoid membrane                                                                                                                                                                        | 36  | <b>0.0207</b> |
| GO:0016790~thiolester hydrolase activity                                                                                                                                                                     | 16  | <b>0.0208</b> |
| GO:0006464~protein modification process                                                                                                                                                                      | 145 | <b>0.0216</b> |
| GO:0005515~protein binding                                                                                                                                                                                   | 343 | <b>0.0221</b> |
| GO:0045036~protein targeting to chloroplast                                                                                                                                                                  | 6   | <b>0.0226</b> |
| GO:0051276~chromosome organization                                                                                                                                                                           | 30  | <b>0.0229</b> |
| GO:0017076~purine nucleotide binding                                                                                                                                                                         | 264 | <b>0.0257</b> |
| GO:0042651~thylakoid membrane                                                                                                                                                                                | 37  | <b>0.0260</b> |
| GO:0006325~chromatin organization                                                                                                                                                                            | 26  | <b>0.0278</b> |
| GO:0008080~N-acetyltransferase activity                                                                                                                                                                      | 10  | <b>0.0291</b> |
| GO:0010051~xylem and phloem pattern formation                                                                                                                                                                | 8   | <b>0.0299</b> |
| GO:0032870~cellular response to hormone stimulus                                                                                                                                                             | 45  | <b>0.0303</b> |
| GO:0009755~hormone-mediated signaling                                                                                                                                                                        | 45  | <b>0.0303</b> |
| GO:0048511~rhythmic process                                                                                                                                                                                  | 9   | <b>0.0307</b> |
| GO:0016310~phosphorylation                                                                                                                                                                                   | 108 | <b>0.0314</b> |
| GO:0005529~sugar binding                                                                                                                                                                                     | 18  | <b>0.0322</b> |
| GO:0004672~protein kinase activity                                                                                                                                                                           | 112 | <b>0.0339</b> |
| GO:0044036~cell wall macromolecule metabolic process                                                                                                                                                         | 9   | <b>0.0342</b> |
| GO:0016730~oxidoreductase activity, acting on iron-sulfur proteins as donors                                                                                                                                 | 4   | <b>0.0345</b> |
| GO:0010305~leaf vascular tissue pattern formation                                                                                                                                                            | 5   | <b>0.0360</b> |
| GO:0004392~heme oxygenase (decyclizing) activity                                                                                                                                                             | 3   | <b>0.0383</b> |
| GO:0009733~response to auxin stimulus                                                                                                                                                                        | 36  | <b>0.0384</b> |
| GO:0016706~oxidoreductase activity, acting on paired donors, with incorporation or reduction of molecular oxygen, 2-oxoglutarate as one donor, and incorporation of one atom each of oxygen into both donors | 13  | <b>0.0393</b> |
| GO:0004386~helicase activity                                                                                                                                                                                 | 23  | <b>0.0396</b> |
| GO:0017111~nucleoside-triphosphatase activity                                                                                                                                                                | 83  | <b>0.0400</b> |
| GO:0030246~carbohydrate binding                                                                                                                                                                              | 27  | <b>0.0410</b> |
| GO:0043412~biopolymer modification                                                                                                                                                                           | 154 | <b>0.0458</b> |
| GO:0010588~cotyledon vascular tissue pattern formation                                                                                                                                                       | 4   | <b>0.0460</b> |
| GO:0043226~organelle                                                                                                                                                                                         | 785 | <b>0.0465</b> |
| GO:0008037~cell recognition                                                                                                                                                                                  | 7   | <b>0.0469</b> |
| GO:0048544~recognition of pollen                                                                                                                                                                             | 7   | <b>0.0469</b> |
| GO:0034357~photosynthetic membrane                                                                                                                                                                           | 38  | <b>0.0473</b> |
| GO:0043229~intracellular organelle                                                                                                                                                                           | 785 | <b>0.0485</b> |
| GO:0016410~N-acyltransferase activity                                                                                                                                                                        | 10  | <b>0.0489</b> |
| GO:0010345~suberin biosynthetic process                                                                                                                                                                      | 3   | <b>0.0498</b> |

### Up-regulated Pathway categories

| Term                                             | Number of genes | P- Value      |
|--------------------------------------------------|-----------------|---------------|
| ath00941:Flavonoid biosynthesis                  | 8               | <b>0.0008</b> |
| P00049:Parkinson disease                         | 18              | <b>0.0018</b> |
| ath01070:Biosynthesis of plant hormones          | 42              | <b>0.0035</b> |
| ath00592:alpha-Linolenic acid metabolism         | 8               | <b>0.0099</b> |
| ath01062:Biosynthesis of terpenoids and steroids | 28              | <b>0.0112</b> |
| ath00905:Brassinosteroid biosynthesis            | 4               | <b>0.0117</b> |
| P00059:p53 pathway                               | 11              | <b>0.0154</b> |
| P00006:Apoptosis signaling pathway               | 11              | <b>0.0171</b> |
| ath01061:Biosynthesis of phenylpropanoids        | 33              | <b>0.0179</b> |
| P00048:PI3 kinase pathway                        | 7               | <b>0.0219</b> |
| ath00908:Zeatin biosynthesis                     | 6               | <b>0.0346</b> |
| ath00940:Phenylpropanoid biosynthesis            | 16              | <b>0.0421</b> |

### Down-regulated Pathway categories

| Term                                                           | Number of genes | P- Value      |
|----------------------------------------------------------------|-----------------|---------------|
| ath00680:Methane metabolism                                    | 17              | <b>0.0001</b> |
| ath00940:Phenylpropanoid biosynthesis                          | 18              | <b>0.0005</b> |
| ath00360:Phenylalanine metabolism                              | 14              | <b>0.0023</b> |
| ath00945:Stilbenoid, diarylheptanoid and gingerol biosynthesis | 11              | <b>0.0121</b> |
| ath00903:Limonene and pinene degradation                       | 11              | <b>0.0164</b> |
| ath03060:Protein export                                        | 6               | <b>0.0201</b> |
| ath00910:Nitrogen metabolism                                   | 8               | <b>0.0210</b> |

**Supplementary material 7: List of Bins with their names and normalized p-value used in Me**

| Bins          | Name                                                                                | P-value     |
|---------------|-------------------------------------------------------------------------------------|-------------|
| 10            | cell wall                                                                           | 0           |
| 20.1.7.12     | stress.biotic.PR-proteins.plant defensins                                           | 0           |
| 29.2.1.2      | protein.synthesis.ribosomal protein.eukaryotic                                      | 0           |
| 29.2.1        | protein.synthesis.ribosomal protein                                                 | 8.88178E-16 |
| 29.2.1.2.1    | protein.synthesis.ribosomal protein.eukaryotic.40S subunit                          | 1.60525E-11 |
| 29.4          | protein.postranslational modification                                               | 2.09438E-11 |
| 20.2.1        | stress.abiotic.heat                                                                 | 2.9415E-10  |
| 26.21         | misc.protease inhibitor/seed storage/lipid transfer protein (LTP) family protein    | 7.80184E-10 |
| 35.1.5        | not assigned.no ontology.pentatricopeptide (PPR) repeat-containing protein          | 2.10511E-09 |
| 26.28         | misc.GDSL-motif lipase                                                              | 5.76489E-09 |
| 29.2.1.2.2    | protein.synthesis.ribosomal protein.eukaryotic.60S subunit                          | 6.77337E-09 |
| 29.2          | protein.synthesis                                                                   | 4.00594E-08 |
| 30            | signalling                                                                          | 2.67655E-07 |
| 16.7          | secondary metabolism.wax                                                            | 3.54081E-07 |
| 30.2.3        | signalling.receptor kinases.leucine rich repeat III                                 | 4.75969E-07 |
| 30.2.17       | signalling.receptor kinases.DUF 26                                                  | 5.49564E-07 |
| 10.5.1        | cell wall.cell wall proteins.AGPs                                                   | 5.77453E-07 |
| 26.19         | misc.plastocyanin-like                                                              | 8.09148E-07 |
| 27.3.32       | RNA.regulation of transcription.WRKY domain transcription factor family             | 9.57122E-07 |
| 17            | hormone metabolism                                                                  | 1.03302E-06 |
| 28.1.3        | DNA.synthesis/chromatin structure.histone                                           | 4.57722E-06 |
| 29.4.1        | protein.postranslational modification.kinase                                        | 4.76782E-06 |
| 10.7          | cell wall.modification                                                              | 5.576E-06   |
| 3.5           | minor CHO metabolism.others                                                         | 1.14161E-05 |
| 29.5.11.4.3   | protein.degradation.ubiquitin.E3.SCF                                                | 1.97895E-05 |
| 27.3.41       | RNA.regulation of transcription.B3 transcription factor family                      | 2.46821E-05 |
| 10.6.3        | cell wall.degradation.pectate lyases and polygalacturonases                         | 3.10815E-05 |
| 17.2.3        | hormone metabolism.auxin.induced-regulated-responsive-activated                     | 3.32029E-05 |
| 20.1.7        | stress.biotic.PR-proteins                                                           | 3.95973E-05 |
| 11.4          | lipid metabolism.TAG synthesis                                                      | 5.20752E-05 |
| 27.1.1        | RNA.processing.splicing                                                             | 5.64054E-05 |
| 29.4.1.57     | protein.postranslational modification.kinase.receptor like cytoplasmatic kinase VII | 6.87772E-05 |
| 17.6          | hormone metabolism.gibberelin                                                       | 8.79341E-05 |
| 10.8.99       | cell wall.pectin*esterases.misc                                                     | 8.96677E-05 |
| 29.5.7        | protein.degradation.metalloprotease                                                 | 0.000131563 |
| 11.1          | lipid metabolism.FA synthesis and FA elongation                                     | 0.000151908 |
| 30.2.25       | signalling.receptor kinases.wall associated kinase                                  | 0.000171498 |
| 17.2          | hormone metabolism.auxin                                                            | 0.000227617 |
| 10.6          | cell wall.degradation                                                               | 0.000233265 |
| 26.4          | misc.beta 1,3 glucan hydrolases                                                     | 0.000236293 |
| 29.5.11.4.3.2 | protein.degradation.ubiquitin.E3.SCF.FBOX                                           | 0.000264372 |
| 11.1.10       | lipid metabolism.FA synthesis and FA elongation.beta ketoacyl CoA synthase          | 0.000265685 |
| 35.1.21       | not assigned.no ontology.epsin N-terminal homology (ENTH) domain-containing pro     | 0.000284465 |
| 27.3.1        | RNA.regulation of transcription.ABI3/VP1-related B3-domain-containing transcripti   | 0.000357717 |
| 10.5          | cell wall.cell wall proteins                                                        | 0.000382628 |
| 20.2.3        | stress.abiotic.drought/salt                                                         | 0.000389247 |
| 34.8          | transport.metabolite transporters at the envelope membrane                          | 0.000406728 |
| 27.1          | RNA.processing                                                                      | 0.000449219 |
| 26.3.4        | misc.gluco-, galacto- and mannosidases.endoglucanase                                | 0.000466589 |
| 10.8          | cell wall.pectin*esterases                                                          | 0.000494611 |
| 17.6.3        | hormone metabolism.gibberelin.induced-regulated-responsive-activated                | 0.000563582 |
| 1             | PS                                                                                  | 0.000569326 |
| 17.3          | hormone metabolism.brassinosteroid                                                  | 0.000634884 |

|               |                                                                                           |             |
|---------------|-------------------------------------------------------------------------------------------|-------------|
| 30.3          | signalling.calcium                                                                        | 0.000686324 |
| 17.3.1        | hormone metabolism.brassinosteroid.synthesis-degradation                                  | 0.000817501 |
| 26.1          | misc.misc2                                                                                | 0.000928231 |
| 35.1.8        | not assigned.no ontology.BSD domain-containing protein                                    | 0.000955535 |
| 33            | development                                                                               | 0.001006017 |
| 29.8          | protein.assembly and cofactor ligation                                                    | 0.001093822 |
| 27.3.80       | RNA.regulation of transcription.zf-HD                                                     | 0.001202283 |
| 30.2.13       | signalling.receptor kinases.leucine rich repeat XIII                                      | 0.001335132 |
| 27.3.52       | RNA.regulation of transcription.Global transcription factor group                         | 0.001335748 |
| 11            | lipid metabolism                                                                          | 0.001468945 |
| 27.3.10       | RNA.regulation of transcription.C2C2(Zn) YABBY family                                     | 0.001532093 |
| 30.2.7        | signalling.receptor kinases.leucine rich repeat VII                                       | 0.00155352  |
| 29.5.1        | protein.degradation.subtilases                                                            | 0.001654204 |
| 26.8          | misc.nitrilases, *nitrile lyases, berberine bridge enzymes, reticuline oxidases, troponin | 0.001691843 |
| 10.5.4        | cell wall.cell wall proteins.HRGP                                                         | 0.001799806 |
| 35.1.22       | not assigned.no ontology.late embryogenesis abundant domain-containing protein            | 0.001949375 |
| 13.1.6        | amino acid metabolism.synthesis.aromatic aa                                               | 0.002486261 |
| 27.3.9        | RNA.regulation of transcription.C2C2(Zn) GATA transcription factor family                 | 0.002653566 |
| 27.3.14       | RNA.regulation of transcription.CCAAT box binding factor family, HAP2                     | 0.002700364 |
| 30.2.20       | signalling.receptor kinases.wheat LRK10 like                                              | 0.002762455 |
| 20.2          | stress.abiotic                                                                            | 0.003097627 |
| 33.99         | development.unspecified                                                                   | 0.003253772 |
| 27.3.29       | RNA.regulation of transcription.TCP transcription factor family                           | 0.003359612 |
| 20.1.2        | stress.biotic.receptors                                                                   | 0.00338976  |
| 14            | S-assimilation                                                                            | 0.003407025 |
| 11.1.12       | lipid metabolism.FA synthesis and FA elongation.ACP protein                               | 0.003680423 |
| 30.4          | signalling.phosphoinositides                                                              | 0.004363324 |
| 17.6.1.13     | hormone metabolism.gibberelin.synthesis-degradation.GA2 oxidase                           | 0.0048055   |
| 30.2.16       | signalling.receptor kinases.Catharanthus roseus-like RLK1                                 | 0.004976964 |
| 10.2          | cell wall.cellulose synthesis                                                             | 0.005155882 |
| 30.2.24       | signalling.receptor kinases.S-locus glycoprotein like                                     | 0.005436124 |
| 29.5.11.4.3.1 | protein.degradation.ubiquitin.E3.SCF.SKP                                                  | 0.005447694 |
| 34.13         | transport.peptides and oligopeptides                                                      | 0.005847368 |
| 21.1          | redox.thioredoxin                                                                         | 0.005998359 |
| 21.4          | redox.glutaredoxins                                                                       | 0.006142178 |
| 29.5.4        | protein.degradation.aspartate protease                                                    | 0.006319734 |
| 18            | Co-factor and vitamine metabolism                                                         | 0.006671858 |
| 13.1.6.5      | amino acid metabolism.synthesis.aromatic aa.tryptophan                                    | 0.006758265 |
| 1.1.6         | PS.lightreaction.NADH DH                                                                  | 0.00684309  |
| 29            | protein                                                                                   | 0.006885524 |
| 8.3           | TCA / org. transformation.carbonic anhydrases                                             | 0.007334831 |
| 11.6          | lipid metabolism.lipid transfer proteins etc                                              | 0.008291534 |
| 13.1.1.3      | amino acid metabolism.synthesis.central amino acid metabolism.alanine                     | 0.008500813 |
| 17.3.1.1      | hormone metabolism.brassinosteroid.synthesis-degradation.BRs                              | 0.008631142 |
| 13.1.1.3.1    | amino acid metabolism.synthesis.central amino acid metabolism.alanine.alanine amin        | 0.008915676 |
| 17.6.1.11     | hormone metabolism.gibberelin.synthesis-degradation.GA20 oxidase                          | 0.009022883 |
| 29.2.1.2.2.82 | protein.synthesis.ribosomal protein.eukaryotic.60S subunit.P2                             | 0.009872045 |
| 3.2           | minor CHO metabolism.trehalose                                                            | 0.010227501 |
| 29.4.1.59     | protein.postranslational modification.kinase.receptor like cytoplasmatic kinase IX        | 0.010475802 |
| 30.2.15       | signalling.receptor kinases.thaumatin like                                                | 0.011048342 |
| 26            | misc                                                                                      | 0.011217075 |
| 1.1.5.3       | PS.lightreaction.other electron carrier (ox/red).ferredoxin reductase                     | 0.011487263 |
| 3.2.1         | minor CHO metabolism.trehalose.TPS                                                        | 0.011651487 |
| 16.1          | secondary metabolism.simple phenols                                                       | 0.011727781 |
| 26.24         | misc.GCN5-related N-acetyltransferase                                                     | 0.01206135  |
| 11.5.2        | lipid metabolism.glycerol metabolism.Glycerol-3-phosphate dehydrogenase (NAD+)            | 0.012278261 |
| 3.2.2         | minor CHO metabolism.trehalose.TPP                                                        | 0.012615494 |
| 21.2          | redox.ascorbate and glutathione                                                           | 0.013272539 |

|               |                                                                                     |             |
|---------------|-------------------------------------------------------------------------------------|-------------|
| 14.1          | S-assimilation.APS                                                                  | 0.014125754 |
| 27.3.73       | RNA.regulation of transcription.Zn-finger(CCHC)                                     | 0.01477027  |
| 29.3.4        | protein.targeting.secretory pathway                                                 | 0.015025832 |
| 16.8.1.1      | secondary metabolism.flavonoids.anthocyanins.leucocyanidin oxygenase                | 0.015070825 |
| 29.2.99       | protein.synthesis.misc                                                              | 0.015129737 |
| 16.5.1.3.3    | secondary metabolism.sulfur-containing.glucosinolates.degradation.nitrilase         | 0.016167547 |
| 29.3.3        | protein.targeting.chloroplast                                                       | 0.016171814 |
| 16.8.3.1      | secondary metabolism.flavonoids.dihydroflavonols.dihydrokaempferol 4-reductase      | 0.017158364 |
| 17.7.1.5      | hormone metabolism.jasmonate.synthesis-degradation.12-Oxo-PDA-reductase             | 0.017218443 |
| 31.3          | cell.cycle                                                                          | 0.017861337 |
| 33.3          | development.squamosa promoter binding like (SPL)                                    | 0.019078503 |
| 26.1          | misc.cytochrome P450                                                                | 0.01951085  |
| 17.5.3        | hormone metabolism.ethylene.induced-regulated-responsive-activated                  | 0.020111612 |
| 30.2.9        | signalling.receptor kinases.leucine rich repeat IX                                  | 0.020597085 |
| 1.1           | PS.lightreaction                                                                    | 0.02109758  |
| 1.2           | PS.photorespiration                                                                 | 0.021114347 |
| 29.3.5        | protein.targeting.peroxisomes                                                       | 0.021690896 |
| 30.2.4        | signalling.receptor kinases.leucine rich repeat IV                                  | 0.022312313 |
| 27.3.40       | RNA.regulation of transcription.Aux/IAA family                                      | 0.022967211 |
| 11.3.3        | lipid metabolism.Phospholipid synthesis.phosphatidate cytidyltransferase            | 0.023343342 |
| 29.2.1.2.1.17 | protein.synthesis.ribosomal protein.eukaryotic.40S subunit.S17                      | 0.023534604 |
| 30.9          | signalling.lipids                                                                   | 0.023699289 |
| 26.4.1        | misc.beta 1,3 glucan hydrolases.glucan endo-1,3-beta-glucosidase                    | 0.023889211 |
| 11.1.11       | lipid metabolism.FA synthesis and FA elongation.fatty acid elongase                 | 0.024048573 |
| 21.6          | redox.dismutases and catalases                                                      | 0.024563978 |
| 29.3.4.3      | protein.targeting.secretory pathway.vacuole                                         | 0.02460487  |
| 21            | redox                                                                               | 0.025198092 |
| 27.3.8        | RNA.regulation of transcription.C2C2(Zn) DOF zinc finger family                     | 0.02554474  |
| 11.3.6        | lipid metabolism.Phospholipid synthesis.choline-phosphate cytidyltransferase        | 0.025647728 |
| 13.2.4.4      | amino acid metabolism.degradation.branched-chain group.leucine                      | 0.025852935 |
| 29.2.1.1.3.2  | protein.synthesis.ribosomal protein.prokaryotic.unknown organellar.50S subunit      | 0.027620755 |
| 13.1.6.1      | amino acid metabolism.synthesis.aromatic aa.chorismate                              | 0.02770433  |
| 16.8.4        | secondary metabolism.flavonoids.flavonols                                           | 0.027715863 |
| 20.1.3        | stress.biotic.signalling                                                            | 0.027797018 |
| 30.2.8        | signalling.receptor kinases                                                         | 0.028910755 |
| 35.1.42       | not assigned.no ontology.proline rich family                                        | 0.029747601 |
| 10.5.2        | cell wall.cell wall proteins.proline rich proteins                                  | 0.03040922  |
| 17.3.1.2      | hormone metabolism.brassinosteroid.synthesis-degradation.sterols                    | 0.030879451 |
| 16.8.4.1      | secondary metabolism.flavonoids.flavonols.dihydrokaempferol 4-reductase             | 0.031579472 |
| 29.3          | protein.targeting                                                                   | 0.031617945 |
| 29.2.1.1      | protein.synthesis.ribosomal protein.prokaryotic                                     | 0.033043305 |
| 27.3.35       | RNA.regulation of transcription.bZIP transcription factor family                    | 0.033165034 |
| 13.1.6.5.5    | amino acid metabolism.synthesis.aromatic aa.tryptophan.tryptophan synthase          | 0.034502533 |
| 27.3.36       | RNA.regulation of transcription.Argonaute                                           | 0.034688039 |
| 1.1.5         | PS.lightreaction.other electron carrier (ox/red)                                    | 0.034841083 |
| 10.1.12       | cell wall.precursor synthesis.KDO pathway                                           | 0.035119656 |
| 30.7          | signalling.14-3-3 proteins                                                          | 0.036196273 |
| 27.3.99       | RNA.regulation of transcription.unclassified                                        | 0.036358735 |
| 16.8.1.21     | secondary metabolism.flavonoids.anthocyanins.anthocyanin 5-aromatic acyltransferase | 0.036494554 |
| 27.4          | RNA.RNA binding                                                                     | 0.036579604 |
| 16            | secondary metabolism                                                                | 0.03714996  |
| 29.2.1.2.2.81 | protein.synthesis.ribosomal protein.eukaryotic.60S subunit.P1                       | 0.037497251 |
| 15.2          | metal handling.binding, chelation and storage                                       | 0.038294312 |
| 29.2.1.2.1.11 | protein.synthesis.ribosomal protein.eukaryotic.40S subunit.S11                      | 0.038829164 |
| 29.2.1.2.1.15 | protein.synthesis.ribosomal protein.eukaryotic.40S subunit.S15                      | 0.03914259  |
| 10.6.1        | cell wall.degradation.cellulases and beta -1,4-glucanases                           | 0.0396184   |
| 34            | transport                                                                           | 0.039848321 |
| 13            | amino acid metabolism                                                               | 0.040245246 |



|               |                                                                                  |             |
|---------------|----------------------------------------------------------------------------------|-------------|
| 10.3          | cell wall.hemicellulose synthesis                                                | 0.040493885 |
| 17.4.1        | hormone metabolism.cytokinin.synthesis-degradation                               | 0.040697319 |
| 29.1.22       | protein.aa activation.asparagine-tRNA ligase                                     | 0.04092272  |
| 3             | minor CHO metabolism                                                             | 0.041282792 |
| 27.3.66       | RNA.regulation of transcription.Psdo ARR transcription factor family             | 0.041354873 |
| 27.3.71       | RNA.regulation of transcription.SNF7                                             | 0.041396223 |
| 10.1.4        | cell wall.precursor synthesis.UGD                                                | 0.041501876 |
| 29.5.9        | protein.degradation.AAA type                                                     | 0.042426528 |
| 34.19         | transport.Major Intrinsic Proteins                                               | 0.04250865  |
| 35.1          | not assigned.no ontology                                                         | 0.043164097 |
| 29.2.1.2.1.25 | protein.synthesis.ribosomal protein.eukaryotic.40S subunit.S25                   | 0.043757296 |
| 29.5.11.4.5.1 | protein.degradation.ubiquitin.E3.BTB/POZ Cullin3.Cullin3                         | 0.043967882 |
| 30.1          | signalling.in sugar and nutrient physiology                                      | 0.044114771 |
| 17.1.3        | hormone metabolism.abscisic acid.induced-regulated-responsive-activated          | 0.044327721 |
| 30.8          | signalling.misc                                                                  | 0.045462772 |
| 27.3.3        | RNA.regulation of transcription.AP2/EREBP, APETALA2/Ethylene-responsive elem     | 0.045507464 |
| 10.2.2        | cell wall.cellulose synthesis.COBRA                                              | 0.045897048 |
| 1.1.40        | PS.lightreaction.cyclic electron flow-chlororespiration                          | 0.046865323 |
| 23.1.99       | nucleotide metabolism.synthesis.unspecified                                      | 0.047421445 |
| 8.1.4         | TCA / org. transformation.TCA.IDH                                                | 0.047961762 |
| 11.1.5        | lipid metabolism.FA synthesis and FA elongation.beta hydroxyacyl ACP dehydratase | 0.048645432 |
| 27.3.37       | RNA.regulation of transcription.AS2,Lateral Organ Boundaries Gene Family         | 0.049217439 |
| 30.2.8.2      | signalling.receptor kinases.leucine rich repeat VIII-2                           | 0.049719082 |
| 26.13         | misc.acid and other phosphatases                                                 | 0.049871408 |

**apman**

**Supplementary material 8: List of up-regulated genes with MaRAP2-4 interacting *cis*-elements**

| DRE       | JARE      | GCC       |
|-----------|-----------|-----------|
| AT4G15750 | AT5G20630 | AT5G50790 |
| AT2G42840 | AT4G12870 | AT3G26140 |
| AT5G45670 | AT1G16390 | AT1G10640 |
| AT4G29030 | AT2G10940 | AT4G35725 |
| AT4G12870 | AT3G16370 | AT4G14750 |
| AT5G39220 | AT3G17600 | AT3G10570 |
| AT5G50790 | AT5G63230 | AT1G15150 |
| AT3G54340 | AT5G51490 | AT5G07540 |
| AT1G53130 | AT2G32370 | AT4G33790 |
| AT5G01075 | AT4G26590 | AT5G48100 |
| AT5G08000 | AT4G14750 | AT4G31840 |
| AT3G04280 | AT1G70560 | AT1G78760 |
| AT5G51950 | AT5G24780 | AT5G12940 |
| AT5G09370 | AT5G47150 | AT2G29790 |
| AT4G12890 | AT5G38180 | AT1G80100 |
| AT1G26945 | AT1G31310 | AT2G28040 |
| AT3G17600 | AT1G43640 | AT2G38530 |
| AT1G55260 | AT1G49770 | AT4G02830 |
| AT3G12610 | AT3G50870 | AT1G28360 |
| AT5G25460 | AT1G28590 | AT2G34870 |
| AT1G10640 | AT1G09380 | AT5G66590 |
| AT4G39330 | AT3G18470 | AT1G01110 |
| AT2G35310 | AT3G61970 | AT3G14190 |
| AT2G27880 | AT2G37380 | AT1G68460 |
| AT5G01790 | AT2G38995 | AT1G50110 |
| AT1G52695 | AT5G08640 | AT4G29150 |
| AT1G34580 | AT4G22430 | AT2G14620 |
| AT2G42110 | AT5G12270 | AT4G27330 |
| AT4G15210 | AT1G68500 | AT5G59040 |
| AT4G28780 | AT4G30610 | AT1G24590 |
| AT1G31310 | AT1G44760 | AT5G02890 |
| AT3G43960 | AT5G57920 | AT5G18030 |
| AT4G17480 | AT1G23200 | AT1G08560 |
| AT3G05980 | AT5G09970 | AT3G46320 |
| AT5G48100 | AT5G47920 | AT5G17220 |
| AT2G20870 | AT1G70720 | AT4G25480 |
| AT3G13540 | AT5G45960 | AT2G33850 |
| AT4G23600 | AT4G01080 | AT1G47610 |
| AT5G48900 | AT5G40040 | AT5G51480 |
| AT1G06360 | AT4G02290 | AT1G49430 |
| AT5G53390 | AT3G23140 | AT1G34640 |
| AT2G02990 | AT4G24275 | AT4G18920 |
| AT1G78760 | AT5G55132 | AT1G17560 |
| AT5G12940 | AT3G17760 | AT1G65900 |
| AT2G37640 | AT5G62170 | AT2G47880 |
| AT3G61970 | AT5G13140 | AT3G15357 |
| AT3G54550 | AT1G52690 | AT3G13175 |
| AT1G78170 | AT5G02890 | AT2G38760 |
| AT5G01180 | AT3G16670 | AT4G28430 |
| AT2G38530 | AT1G08560 | AT3G61490 |
| AT4G10290 | AT5G23940 | AT3G52810 |
| AT1G67750 | AT3G46320 | AT1G53140 |

| DRE+JARE  | DRE+GCC   | JARE+GCC  |
|-----------|-----------|-----------|
| AT4G12870 | AT5G50790 | AT4G14750 |
| AT3G17600 | AT1G10640 | AT5G02890 |
| AT1G31310 | AT5G48100 | AT1G08560 |
| AT3G61970 | AT1G78760 | AT3G46320 |
| AT1G44760 | AT5G12940 | AT5G17220 |
| AT5G09970 | AT2G38530 | AT2G33850 |
| AT1G70720 | AT2G34870 | AT4G12690 |
| AT4G02290 | AT5G66590 | AT4G23380 |
| AT3G17760 | AT3G14190 | AT1G02460 |
| AT5G62170 | AT1G68460 | AT3G24220 |
| AT5G02890 | AT1G50110 | AT4G23800 |
| AT3G16670 | AT5G02890 | AT1G25450 |
| AT1G08560 | AT1G08560 | AT5G44110 |
| AT5G23940 | AT5G17220 | AT3G52340 |
| AT5G17220 | AT4G25480 | AT5G10720 |
| AT4G18570 | AT2G33850 | AT2G13820 |
| AT4G13840 | AT5G51480 | AT3G11600 |
| AT2G14900 | AT1G49430 | AT3G08030 |
| AT5G02540 | AT2G47880 | AT3G14740 |
| AT1G70710 | AT3G15357 | AT2G35585 |
| AT4G02800 | AT3G13175 | AT2G45360 |
| AT1G76500 | AT3G61490 | AT1G71870 |
| AT3G20820 | AT3G52810 | AT3G59140 |
| AT2G33850 | AT1G53140 | AT3G04850 |
| AT4G33270 | AT4G11310 | AT5G35670 |
| AT1G34355 | AT2G26250 |           |
| AT3G59890 | AT3G19270 |           |
| AT1G12010 | AT1G67035 |           |
| AT4G34220 | AT1G60060 |           |
| AT2G02100 | AT4G28250 |           |
| AT1G52190 | AT5G61570 |           |
| AT1G26770 | AT4G10190 |           |
| AT1G75710 | AT1G02460 |           |
| AT4G33260 | AT4G01410 |           |
| AT4G38660 | AT2G17630 |           |
| AT2G15440 | AT1G09540 |           |
| AT3G57510 | AT1G54040 |           |
| AT4G36380 | AT4G23800 |           |
| AT3G07010 | AT2G34650 |           |
| AT4G35190 | AT5G44110 |           |
| AT5G67360 | AT4G12730 |           |
| AT1G02460 | AT1G55740 |           |
| AT1G29460 | AT3G12700 |           |
| AT4G13710 | AT2G38110 |           |
| AT5G42280 | AT5G39320 |           |
| AT3G49220 | AT1G19940 |           |
| AT4G00160 | AT1G29660 |           |
| AT4G23800 | AT3G08030 |           |
| AT1G68570 | AT2G37560 |           |
| AT2G43820 | AT3G03170 |           |
| AT5G44110 | AT2G35585 |           |
| AT5G10430 | AT5G11230 |           |

| DRE+JARE+GCC |
|--------------|
| AT5G02890    |
| AT1G08560    |
| AT5G17220    |
| AT2G33850    |
| AT1G02460    |
| AT4G23800    |
| AT5G44110    |
| AT3G08030    |
| AT2G35585    |
| AT1G71870    |
| AT3G59140    |
| AT3G04850    |

|           |           |           |
|-----------|-----------|-----------|
| AT3G29370 | AT5G17220 | AT4G11310 |
| AT2G34870 | AT3G48350 | AT1G71695 |
| AT3G53530 | AT4G39650 | AT2G07170 |
| AT5G47590 | AT3G09950 | AT1G01610 |
| AT1G79840 | AT1G68450 | AT4G12690 |
| AT2G42590 | AT4G18570 | AT2G26250 |
| AT2G45470 | AT4G13840 | AT5G14410 |
| AT1G44760 | AT2G14900 | AT5G55480 |
| AT5G07280 | AT5G02540 | AT5G65010 |
| AT2G23800 | AT1G70710 | AT1G19830 |
| AT5G17430 | AT5G11130 | AT3G04290 |
| AT5G18290 | AT4G02800 | AT3G19270 |
| AT5G09970 | AT1G76500 | AT5G27330 |
| AT5G07200 | AT3G20820 | AT1G67035 |
| AT1G05490 | AT5G23400 | AT4G23380 |
| AT3G02480 | AT2G33850 | AT1G60060 |
| AT5G66590 | AT4G33270 | AT4G28250 |
| AT5G43020 | AT5G40630 | AT5G61570 |
| AT1G70720 | AT1G34355 | AT1G77210 |
| AT5G37810 | AT3G28860 | AT5G28000 |
| AT5G03120 | AT3G50740 | AT4G10190 |
| AT4G02290 | AT3G55660 | AT2G43360 |
| AT1G78220 | AT3G54180 | AT1G02460 |
| AT4G00400 | AT3G59890 | AT4G01410 |
| AT5G02580 | AT2G26180 | AT3G24220 |
| AT2G01520 | AT4G23870 | AT2G17630 |
| AT3G21420 | AT2G45420 | AT1G09540 |
| AT1G02070 | AT1G12010 | AT1G54040 |
| AT2G40170 | AT5G24790 | AT4G23800 |
| AT1G30920 | AT4G34220 | AT1G25450 |
| AT2G13610 | AT2G02100 | AT2G34650 |
| AT4G29285 | AT4G10895 | AT5G01910 |
| AT4G02330 | AT4G24260 | AT5G44110 |
| AT3G14190 | AT1G52190 | AT5G07500 |
| AT1G68460 | AT1G26770 | AT3G52340 |
| AT5G67110 | AT1G75710 | AT1G62640 |
| AT1G50110 | AT4G33260 | AT4G12730 |
| AT2G42540 | AT1G80280 | AT3G27060 |
| AT5G05220 | AT3G23890 | AT1G72130 |
| AT3G21620 | AT1G48480 | AT1G55740 |
| AT3G17760 | AT2G21650 | AT5G10720 |
| AT5G62170 | AT3G10520 | AT1G02180 |
| AT3G63430 | AT4G38660 | AT3G12700 |
| AT5G66580 | AT4G39590 | AT4G37580 |
| AT2G31980 | AT1G61070 | AT2G13820 |
| AT2G18500 | AT2G15440 | AT2G38110 |
| AT5G46795 | AT3G57510 | AT1G75390 |
| AT5G02890 | AT3G24340 | AT3G11600 |
| AT1G05260 | AT4G12690 | AT5G39320 |
| AT1G70270 | AT4G36380 | AT1G19940 |
| AT5G16250 | AT4G28680 | AT5G05965 |
| AT3G03820 | AT3G07010 | AT1G29660 |
| AT3G16670 | AT5G09210 | AT3G08030 |
| AT3G02640 | AT4G35190 | AT2G37560 |
| AT5G20240 | AT2G27040 | AT5G08260 |
| AT1G08560 | AT4G23380 | AT1G48100 |
| AT3G17520 | AT1G10680 | AT3G14740 |
| AT2G45050 | AT5G67360 | AT3G03170 |

|           |           |
|-----------|-----------|
| AT5G65410 | AT1G71870 |
| AT3G23670 | AT1G34430 |
| AT4G25850 | AT2G43550 |
| AT3G22880 | AT3G59140 |
| AT1G70680 | AT2G26640 |
| AT3G22770 | AT3G13690 |
| AT3G48460 | AT3G04850 |
| AT5G65420 | AT3G52370 |
| AT2G22900 |           |
| AT2G01660 |           |
| AT1G66730 |           |
| AT2G24230 |           |
| AT3G08030 |           |
| AT3G60530 |           |
| AT1G11740 |           |
| AT2G35730 |           |
| AT1G56430 |           |
| AT2G35585 |           |
| AT1G67600 |           |
| AT2G24170 |           |
| AT1G71870 |           |
| AT4G36105 |           |
| AT5G18660 |           |
| AT3G59140 |           |
| AT5G62360 |           |
| AT5G64850 |           |
| AT1G02450 |           |
| AT3G02170 |           |
| AT3G62630 |           |
| AT3G04850 |           |
| AT2G46970 |           |

|           |           |           |
|-----------|-----------|-----------|
| AT5G23940 | AT1G02460 | AT3G54750 |
| AT4G32540 | AT1G29460 | AT5G02220 |
| AT4G35670 | AT5G48950 | AT2G35585 |
| AT5G17220 | AT4G13710 | AT5G11230 |
| AT1G62340 | AT5G42280 | AT1G19510 |
| AT2G05790 | AT3G24220 | AT2G45360 |
| AT4G39070 | AT3G49220 | AT1G71870 |
| AT4G36350 | AT4G18760 | AT1G02190 |
| AT3G28290 | AT4G00160 | AT1G34430 |
| AT3G51280 | AT2G16850 | AT2G43550 |
| AT3G01490 | AT2G36080 | AT3G59140 |
| AT4G18570 | AT1G71770 | AT2G26640 |
| AT4G13840 | AT4G23800 | AT1G71020 |
| AT2G14900 | AT1G25450 | AT1G75060 |
| AT5G38170 | AT3G52970 | AT3G13690 |
| AT4G25480 | AT4G25960 | AT2G26910 |
| AT5G02540 | AT1G68570 | AT1G08280 |
| AT1G70710 | AT2G43820 | AT1G72140 |
| AT5G55730 | AT5G44110 | AT3G04850 |
| AT4G02800 | AT3G57860 | AT5G10480 |
| AT1G76500 | AT5G20850 | AT3G52370 |
| AT5G42910 | AT5G10430 | AT5G35670 |
| AT3G11520 | AT5G65410 |           |
| AT5G55340 | AT5G14920 |           |
| AT5G35550 | AT4G11211 |           |
| AT4G12910 | AT3G54250 |           |
| AT3G20820 | AT3G52340 |           |
| AT5G65390 | AT3G23670 |           |
| AT2G33850 | AT3G01410 |           |
| AT1G07610 | AT2G35640 |           |
| AT4G33270 | AT4G25850 |           |
| AT3G11180 | AT3G22880 |           |
| AT5G64080 | AT5G10720 |           |
| AT5G51480 | AT3G55360 |           |
| AT2G32765 | AT1G70680 |           |
| AT2G36190 | AT5G65710 |           |
| AT3G46490 | AT1G23130 |           |
| AT1G34355 | AT5G60490 |           |
| AT3G50620 | AT3G22770 |           |
| AT1G79720 | AT4G15530 |           |
| AT2G36560 | AT5G14130 |           |
| AT5G50750 | AT3G48460 |           |
| AT5G65730 | AT5G65420 |           |
| AT4G37800 | AT2G22900 |           |
| AT5G23650 | AT2G13820 |           |
| AT4G27260 | AT1G09200 |           |
| AT1G49430 | AT5G51890 |           |
| AT5G18430 | AT3G11600 |           |
| AT2G32990 | AT3G43160 |           |
| AT4G32980 | AT2G01660 |           |
| AT3G59890 | AT4G36770 |           |
| AT4G23496 | AT3G26770 |           |
| AT5G01015 | AT1G49580 |           |
| AT1G48990 | AT1G66730 |           |
| AT2G47880 | AT4G38050 |           |
| AT4G14770 | AT4G30800 |           |
| AT3G15357 | AT2G24230 |           |
| AT5G66780 | AT3G08030 |           |

|           |           |
|-----------|-----------|
| AT5G38160 | AT3G60530 |
| AT4G03010 | AT1G11740 |
| AT3G09870 | AT2G35730 |
| AT3G13175 | AT3G47600 |
| AT5G26850 | AT1G10550 |
| AT4G11290 | AT3G46660 |
| AT1G27030 | AT3G14740 |
| AT4G29610 | AT4G10910 |
| AT1G56580 | AT1G56430 |
| AT3G61490 | AT1G51440 |
| AT4G31290 | AT2G35585 |
| AT1G12010 | AT1G67600 |
| AT5G39160 | AT4G20140 |
| AT3G52810 | AT2G24170 |
| AT3G58070 | AT2G45360 |
| AT4G34220 | AT1G71870 |
| AT2G02100 | AT5G44010 |
| AT2G27535 | AT2G16760 |
| AT5G59970 | AT1G19950 |
| AT1G52190 | AT4G36105 |
| AT1G26770 | AT1G51060 |
| AT5G64330 | AT2G24440 |
| AT1G53140 | AT4G04080 |
| AT4G23750 | AT5G18660 |
| AT1G75710 | AT1G07090 |
| AT1G72810 | AT3G59140 |
| AT4G33260 | AT1G21810 |
| AT2G38170 | AT5G62360 |
| AT5G24580 | AT4G32830 |
| AT4G12880 | AT1G70370 |
| AT3G43720 | AT5G64850 |
| AT5G67270 | AT1G02450 |
| AT5G59320 | AT2G30200 |
| AT1G01250 | AT3G29810 |
| AT1G17140 | AT2G23700 |
| AT4G11310 | AT3G02170 |
| AT1G12080 | AT1G70830 |
| AT4G38660 | AT3G62630 |
| AT3G59220 | AT5G44020 |
| AT1G45010 | AT3G04850 |
| AT2G15440 | AT2G46970 |
| AT5G04160 | AT4G00390 |
| AT3G57510 | AT4G14150 |
| AT4G02810 | AT5G35670 |
| AT1G76310 |           |
| AT4G23490 |           |
| AT2G45570 |           |
| AT4G36700 |           |
| AT2G26250 |           |
| AT4G36380 |           |
| AT4G16980 |           |
| AT4G16515 |           |
| AT5G39130 |           |
| AT4G33280 |           |
| AT1G58360 |           |
| AT5G60220 |           |
| AT3G07010 |           |
| AT4G28720 |           |

|           |
|-----------|
| AT2G45970 |
| AT5G20790 |
| AT4G35190 |
| AT1G19640 |
| AT3G19270 |
| AT2G39060 |
| AT4G15680 |
| AT4G16140 |
| AT3G28220 |
| AT2G23050 |
| AT5G40310 |
| AT1G67035 |
| AT4G28250 |
| AT5G61570 |
| AT3G59420 |
| AT1G60060 |
| AT3G52820 |
| AT2G35760 |
| AT1G75750 |
| AT3G16240 |
| AT5G67360 |
| AT4G10190 |
| AT1G01900 |
| AT1G07370 |
| AT1G26100 |
| AT4G01410 |
| AT1G02460 |
| AT1G29460 |
| AT4G13710 |
| AT5G42280 |
| AT3G45230 |
| AT4G31760 |
| AT1G33170 |
| AT2G02130 |
| AT3G54560 |
| AT3G49220 |
| AT2G47780 |
| AT2G17630 |
| AT3G51470 |
| AT1G77270 |
| AT5G66800 |
| AT4G00160 |
| AT1G52400 |
| AT1G54040 |
| AT2G45490 |
| AT1G74160 |
| AT3G53080 |
| AT5G56580 |
| AT1G09540 |
| AT2G15090 |
| AT4G26320 |
| AT3G60220 |
| AT5G03840 |
| AT4G23800 |
| AT1G03170 |
| AT2G34170 |
| AT5G49800 |
| AT1G68570 |



|           |
|-----------|
| AT1G11220 |
| AT2G34650 |
| AT5G13790 |
| AT2G43820 |
| AT4G01730 |
| AT4G13990 |
| AT3G18630 |
| AT5G44110 |
| AT5G25470 |
| AT1G68250 |
| AT5G65410 |
| AT1G65920 |
| AT1G09350 |
| AT1G71830 |
| AT5G10430 |
| AT3G14240 |
| AT5G15660 |
| AT1G78090 |
| AT1G10380 |
| AT3G19850 |
| AT1G23080 |
| AT1G16850 |
| AT3G05020 |
| AT5G49215 |
| AT2G05990 |
| AT3G23670 |
| AT4G25850 |
| AT4G12730 |
| AT1G57750 |
| AT3G13520 |
| AT1G17060 |
| AT1G09750 |
| AT1G21460 |
| AT1G55740 |
| AT5G59020 |
| AT5G59510 |
| AT3G22880 |
| AT5G15950 |
| AT3G12700 |
| AT1G13250 |
| AT5G57260 |
| AT1G70680 |
| AT2G26330 |
| AT1G03440 |
| AT1G45130 |
| AT1G70990 |
| AT3G22770 |
| AT4G14690 |
| AT3G56260 |
| AT3G05890 |
| AT2G38060 |
| AT2G28620 |
| AT5G62960 |
| AT3G05400 |
| AT1G27670 |
| AT5G65420 |
| AT5G22740 |
| AT4G13700 |

|           |
|-----------|
| AT2G22900 |
| AT3G48460 |
| AT4G16460 |
| AT1G35310 |
| AT2G27060 |
| AT1G78390 |
| AT4G13230 |
| AT1G29640 |
| AT3G56480 |
| AT1G27120 |
| AT5G20270 |
| AT2G28330 |
| AT5G24570 |
| AT2G02780 |
| AT2G38110 |
| AT5G22140 |
| AT2G01660 |
| AT5G39320 |
| AT4G11180 |
| AT2G33560 |
| AT2G16440 |
| AT1G19940 |
| AT2G27130 |
| AT1G66730 |
| AT1G10370 |
| AT4G28703 |
| AT1G29660 |
| AT4G37295 |
| AT3G13000 |
| AT5G15310 |
| AT1G77760 |
| AT5G18600 |
| AT2G29130 |
| AT2G24230 |
| AT3G08030 |
| AT2G37560 |
| AT3G22830 |
| AT3G14890 |
| AT1G60390 |
| AT1G29395 |
| AT2G43800 |
| AT3G06140 |
| AT2G25530 |
| AT1G66760 |
| AT3G60530 |
| AT1G69480 |
| AT1G62050 |
| AT5G63650 |
| AT1G11740 |
| AT1G58340 |
| AT2G35730 |
| AT3G22790 |
| AT4G04460 |
| AT5G52900 |
| AT5G23910 |
| AT1G67630 |
| AT5G10620 |
| AT4G27730 |

|           |
|-----------|
| AT1G35780 |
| AT4G22250 |
| AT3G61930 |
| AT5G11510 |
| AT4G22756 |
| AT1G56430 |
| AT2G26580 |
| AT3G19820 |
| AT3G03170 |
| AT1G10030 |
| AT4G36360 |
| AT2G35585 |
| AT1G67600 |
| AT5G66310 |
| AT3G44610 |
| AT5G11230 |
| AT2G24170 |
| AT5G50420 |
| AT3G01550 |
| AT1G12380 |
| AT2G44130 |
| AT4G09170 |
| AT5G47380 |
| AT1G71870 |
| AT1G53160 |
| AT4G36105 |
| AT1G34430 |
| AT5G39890 |
| AT5G15960 |
| AT3G43270 |
| AT5G18660 |
| AT2G42200 |
| AT2G43550 |
| AT3G59140 |
| AT3G63060 |
| AT5G62360 |
| AT2G26640 |
| AT4G12490 |
| AT5G42720 |
| AT1G02340 |
| AT4G02100 |
| AT4G22010 |
| AT5G64850 |
| AT5G37980 |
| AT3G04470 |
| AT1G29670 |
| AT4G37770 |
| AT1G02450 |
| AT1G10560 |
| AT5G47230 |
| AT1G21060 |
| AT4G30410 |
| AT2G29370 |
| AT4G40010 |
| AT5G41460 |
| AT3G06035 |
| AT3G02170 |
| AT5G15740 |

|           |
|-----------|
| AT3G13690 |
| AT2G34850 |
| AT5G16080 |
| AT2G22600 |
| AT5G25830 |
| AT1G68400 |
| AT2G28740 |
| AT5G43870 |
| AT4G22290 |
| AT3G62630 |
| AT2G41650 |
| AT3G03680 |
| AT3G04850 |
| AT3G52370 |
| AT2G46970 |
| AT5G46570 |
| AT5G46710 |
| AT4G30650 |
| AT1G22980 |
| AT4G11450 |
| AT1G65370 |
| AT2G35620 |
| AT4G14020 |
| AT2G42300 |
| AT2G45900 |

## Supplementary material 9

### Supplementary material & methods

#### Microarray preparation and analysis

Total RNA was isolated from control and 6 days waterlogged *Arabidopsis* whole plants (both OE lines and WT) by QIAGEN RNeasy<sup>(R)</sup> Plant Mini Kit. The yield and RNA purity were measured by NanodropND 2000 and Bioanalyser. The mRNA from control and treated roots was used as probe against Arabidopsis\_GXP\_4x44K AMADID slide. RNA labeling and single microarray hybridization involved 2 technical replicates. Each oligonucleotide was randomly replicated and printed on the array. Briefly, 0.5 µg of total RNA was amplified by the Agilent's Quick-Amp labeling Kit (p/n5190-0442) and labeled with Cy3-CTP. T7 promoter based-linear amplification method was used to generate labeled complementary RNA for One-Color Microarray-Based Gene Expression Analysis. In total, 0.825 µg Cy-labeled cRNA was fragmented to an average size of about 50–100 nucleotides by incubation with fragmentation buffer (Agilent Technologies) at 60 °C for 30 min. The fragmented labeled cRNA was then pooled and hybridized to Arabidopsis\_GXP\_4x44K AMADID slide with Agilent's In situ Hybridization kit following manufacture's protocol. After washing and blow-drying with a nitrogen gun, microarrays were scanned with Agilent microarray scanner (Agilent Technologies) at 535 nm for Cy3. Scanned images were analyzed by Agilent Feature Extraction Software (v10.7) to quantify signal and background intensity for each feature. The Microarray images were overall clean showing uniform intensity with very low background noise. GeneSpring GX 12.6 Software determined the normalization and statistical significance. In intra array normalization, gProcessed signal (dye normalized background subtracted signal intensity) is log transformed and then for each of the array the 75th percentile value is calculated separately. In each sample the log transformed intensity values for each probe is subtracted by the calculated 75th percentile value of the respective array and expression values are obtained. Fold induction values from both the microarray analysis were normalized to a single fold value. For filtering up-regulation we consider flag should be Detected in the treated sample and can be compromised or Detected in the control samples and Fold  $\geq 2$  in treated. For filtering down-regulation we consider flag can be Detected or compromised in the treated sample and should be Detected in the control sample and Fold  $\leq 2$  in treated. *P* values were adjusted for 2 experimental replicates using Student's t-test. Fold induction values from both the microarrays along with their normalized fold induction and adjusted *P* values for individual genes are given in Supplementary material 2, 3 and 4. Responsive genes were classified into functional and pathway categories by DAVID database (Supplementary material 5). The microarray data described in this study have been processed for deposition in Gene Expression Omnibus

with GEO accession number: GSE64070. Microarray expression data were visualized using the Mapman 3.6 software (Thimm *et al.* 2004), and functional bins were identified as being significantly responsive to waterlogging stress. Bins with their name and p-value corrected with Wilcoxon rank sum test are given in Supplementary material 6.

### Quantification of total Carbohydrate content

Carbohydrate estimation was done by measuring absorbance at 490 nm by Chow and Landhäusser 2004, Qi *et al.* 2012. For this 200 mg of whole plant tissue was taken; carbohydrates were hydrolyzed and extracted by boiling in 2.5N HCl for 3 hours, cooled to (room temperature) RT and neutralized by Sodium carbonate till the effervescence disappear. Volume was made to 50 ml and to 0.5 ml of the sample added 250 µl of 4% phenol and 1.25 ml 96% Sulphuric acid, mixed properly and OD taken. Standard curve was prepared by diluting 50µg/ml of standard glucose solution.

$$\text{Concentration } \left( \frac{\text{mol}}{\text{g}} \right) = \frac{x(\text{gm})}{\text{Mol. wt } \left( \frac{\text{gm}}{\text{mol}} \right) * \text{weight (gm)}}$$

**X (gm)** = mass of sugar sample deduced from graph

**Mol.wt** = mol.wt of monosaccharide/polysaccharide

**Weight** = fresh weight of the sample

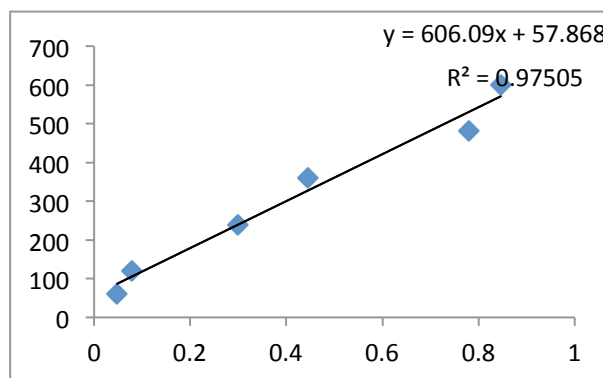

### Quantification of total soluble protein

Protein estimation was done by Bradford method using Bradford reagent (CBB G250). Approximately 200 mg tissue was taken and ground finely in 1 ml of extraction buffer (100 mM KPO4 -pH 7.8, 1 mM EDTA, 1% Triton X-100, and 10% glycerol), vortexed for 3 seconds and incubated at room temperature for 30 minutes to extract protein, again vortexed and centrifuged at 5000g for 10 minutes, pellet discarded and supernatant was taken. To 1 ml of sample 5 ml of 1:4 diluted Bradford dye was added and mixed properly and absorbance was taken at 595 nm against blank (dye reagent + NaOH). Protein contents of all the samples were deduced from the standard curve prepared with BSA concentrations 20, 40, 60, 80, 100 and 120 µg/µl.

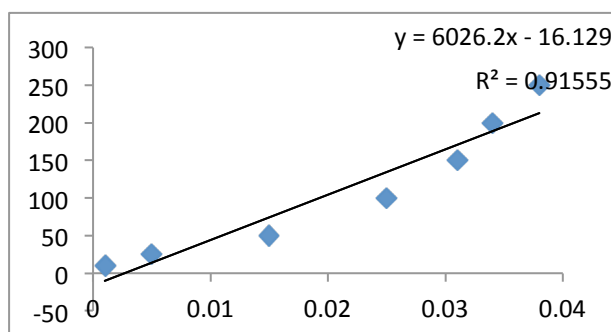

### **Quantification of total chlorophyll content**

Chlorophyll estimation was performed as described by Vernon (1960). Approximately 100 mg of deveined leaf tissue was taken and ground to a fine paste in 80% chilled acetone and the suspension was subjected to centrifugation at maximum speed for 15 minutes. Pellet discarded and supernatant was taken, final volume was made to 10 ml by 80% chilled acetone. Absorbance was taken at 663 nm and 645 nm wavelengths. Amount of chlorophyll was calculated using following formula

$$\text{Total chlorophyll content} = \frac{(A_{663} \times 8.02) + (A_{645} \times 20.2) \times \text{Total volume}}{\text{Volume of solution used for abs.} \times \text{Gram fresh wt. of tissue taken}}$$

### **Measurement of Relative Water Content**

The relative water content (RWC) was determined as described by Yamasaki and Dillenburg (1999). Leaves were cut from treated plants and their fresh weight (FW) was measured. To determine turgid mass (TM), the leaves were floated in deionized water for 7 hours. Finally, the leaf samples were dried in an oven at 80°C for 48 hours to obtain the dry weight (DW). The RWC was then calculated using the following formula

$$\text{RWC\%} = \frac{(\text{FW} - \text{DW})}{(\text{TM} - \text{DW})} \times 100$$

### **Measurement of Lipid peroxidation**

Lipid peroxidation was analyzed by the thiobarbituric acid test, which determines MDA as an end product of lipid peroxidation (Hodges et al., 1999). For this 50 mg of whole plant tissue was crushed in 1 ml of phosphate buffer pH 7.4, centrifuged at 48°C for 20 minutes, mixed with 500 µl 20% TCA and incubated on ice for 30 minutes. Added 500 µl of 0.65% of TBA and incubated at 95°C for 30 minutes. Centrifuged and absorbance of the supernatant was measured at 532 nm. The MDA concentration was calculated from the extinction coefficient 155 mM<sup>-1</sup> cm<sup>-1</sup> using the following formula

$$\text{MDA level} = \left[ \frac{\text{OD}_{532} \times 100}{1.56} \right] \times \frac{\text{TV}}{[\text{wt} \times 1000]}$$

OD = optical density; TV = total volume of the extract (ml); wt = weight of the leaf tissue (g)

### **Extraction for antioxidant activity measurement**

For assays of the enzymatic cellular antioxidants whole plant samples (0.4–0.8 g) were homogenized in ice-cold extraction buffer (pH 7.5) containing 50 mM 4-(2-hydroxyethyl)-1-piperazineethanesulfonic acid (HEPES),



0.4mM ethylenediaminetetraacetic acid (EDTA), 5 mM MgCl<sub>2</sub>, 10 % glycerol, 1% polyvinylpyrrolidone (PVP), 2 mM dithiothreitol (DTT), and 1 mM phenyl methyl sulfonyl fluoride (Gegenheimer, 1990). The homogenate was centrifuged (14,000 g) at 4 °C for 20 min. The supernatant was assayed for enzyme activity.

#### **Quantification of Catalase activity**

Catalase assay was done as described by Sinha (1972). The extract (0.5 ml) was added to the reaction mixture containing 1 ml of 0.01 M phosphate buffer (pH 7.0), 0.5 ml of 0.2 M H<sub>2</sub>O<sub>2</sub>, 0.4 ml H<sub>2</sub>O and incubated for different time period. Reaction was terminated by adding the 2 ml of acid reagent (5% K<sub>2</sub>Cr<sub>2</sub>O<sub>7</sub> with glacial acetic acid in 1:3 ratios). To the control, the enzyme was added after the addition of acid reagent. Tubes were heated for 10 minutes and absorbance was recorded at 610 nm. Catalase activity was expressed in terms of – Enzyme unit (EU) of H<sub>2</sub>O<sub>2</sub> consumed/min/mg FW using following formula

$$\frac{\Delta C}{min} = \frac{\Delta A}{min} \times \frac{1}{pathlength} \times \frac{1}{extinction\ coefficient}$$

#### **Quantification of SOD activity**

Total **SOD activity** was assayed according to Das et al. (2000). The 3 ml reaction mixture contained 50 mM potassium phosphate buffer (pH 7.8), 13 mM methionine, 75 mM NBT, 2 mM riboflavin, 0.1 mM EDTA, and 100 µl enzyme extract. Reaction mixture was illuminated for 15 minutes at a light intensity of 5000 lx. One unit of SOD activity was defined as the amount of enzyme required to cause 50 % inhibition of the reduction of NBT as monitored at 560 nm.

$$\% \text{ Scavenging} = \frac{\text{Absorbance control} - \text{Absorbance sample}}{\text{Absorbance control}} \times 100$$

#### **Quantification of GPx activity**

GPx activity was measured according to the procedure of Rotruck et al. (1973) with some modifications. The reaction mixture consisting of 0.4 ml of 0.4 M sodium phosphate buffer (pH 7.0), 0.1 ml of 10 mM NaN<sub>3</sub>, 0.2 ml of 4 mM reduced glutathione, 0.1 ml of 2.5 mM H<sub>2</sub>O<sub>2</sub>, 0.2 ml of water and 0.5 ml of enzyme was incubated at 0, 30, 60, 90 seconds respectively. Reaction was terminated with 0.5 ml of 10% TCA and after centrifugation; 2 ml of the supernatant was added to 3 ml of phosphate buffer and 1ml of DTNB reagent (0.04% DTNB in 1% sodium citrate). The color developed was read at 412 nm and the enzyme activity is expressed in terms of EU of glutathione utilized/min/mg FW using the following formula

$$\frac{\Delta C}{min} = \frac{\Delta A}{min} \times \frac{1}{pathlength} \times \frac{1}{extinction\ coefficient}$$

### DPPH radical scavenging assay

For DPPH radical scavenging activity aliquots of extracts were made to total volume of 3 ml using methanol. 0.15 ml of freshly prepared DPPH solution (98 $\mu$ g/ml) was added, stirred and left to stand at RT for 30 minutes in dark. The control contains only DPPH solution in methanol while methanol served as the blank (negative control). The reduction capability of DPPH radical was determined by the decrease in its absorbance at 517 nm (Patel et al., 2011).

$$\% \text{ Scavenging} = \frac{\text{Absorbance control} - \text{Absorbance sample}}{\text{Absorbance control}} \times 100$$

### FRAP assay

Total antioxidant activity by FRAP assay was done according to Benzie and Strain (1996). 1.5 ml of freshly prepared FRAP solution, containing 25 ml of 300 mM acetate buffer pH 3.6, 2.5 ml of 10 mM TPTZ in 40 mM HCl, and 2.5 ml of 20 mM FeCl<sub>3</sub>•6H<sub>2</sub>O solution, was mixed with 1ml of extracts, and absorbance was read at 593 nm. The standard curve was linear between 100 and 500  $\mu$ M FeSO<sub>4</sub>•7H<sub>2</sub>O. Results are expressed in  $\mu$ g Fe(II)/mg FW plant material and compared with that of ascorbic acid.

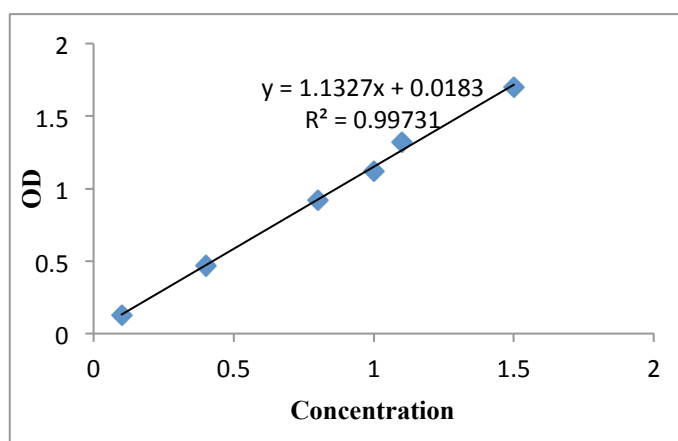

### Quantification of GSH

For Estimation of GSH Boyne and Ellman (1972) method was applied. 1ml of the sample extract was treated with 4 ml of metaphosphoric acid precipitating solution (1.67 g of glacial metaphosphoric acid, 0.2 g EDTA and 30 g NaCl in 100 ml water). After centrifugation, 2.0 ml of the protein-free supernatant was mixed with 0.2 ml of 0.4 M Na<sub>2</sub>HPO<sub>4</sub> and 1 ml of DTNB reagent (40 mg DTNB in 100 ml of aqueous 1% Na<sub>3</sub>C<sub>6</sub>H<sub>5</sub>O<sub>7</sub>).

Absorbance was read at 412 nm within 2 minutes. GSH concentration was expressed as  $\mu\text{g}/\text{mg}$  FW using following formula using standard graph

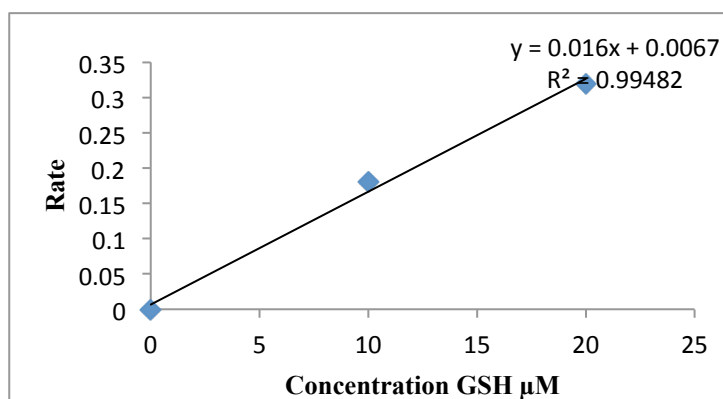

#### Quantification of NO scavenging activity

50  $\mu\text{l}$  of test sample previously dissolved in DMSO was added to 200  $\mu\text{l}$  of 10 mM Sodium Nitroprusside and incubated at room temperature for 2 hours. From it 50  $\mu\text{l}$  of the sample was taken and to it added 100  $\mu\text{l}$  of Griess reagent (1 part of the 0.1 % Naphthalene Diamine Dihydrochloride in water and 1 part 1% sulphanilamide in 5% concentrated phosphoric acid). The absorbance of chromophore formed was measured at 546 nm on UV-visible spectrometer (Patel et al. 2011). NO scavenging was calculated using following formula:

$$\% \text{ Scavenging} = \frac{\text{Absorbance control} - \text{Absorbance sample}}{\text{Absorbance control}} \times 100$$
